# Supplementary material for: Proteomic Comparison of MCF-7 Tumoursphere and Monolayer Cultures
Source: PLoS One. 2012 Dec 20;7(12):e52692. doi: 10.1371/journal.pone.0052692 (PMC3527578; doi:10.1371/journal.pone.0052692)
Supplement: Table S1 — Total list of proteins identified using the MaxQuant method. List of 3542 proteins identified and analysed for differential expression of proteins amongst the three groups via ANOVA and t-test from adherent cells to P2 spheres to P5 spheres. Intensity of counts is shown for the three biological replicates within each group. ANOVA and t-test p values are as indicated. (XLSX) [file pone.0052692.s001.xlsx]

## Sheet: Sheet1-Table-all-proteins
id	Protein Names	ln (LFQ Intensity Adherent3)	ln (LFQ Intensity Adherent6)	ln (LFQ Intensity Adherent9)	ln (LFQ Intensity Passage2-3)	ln (LFQ Intensity Passage2-6)	ln (LFQ Intensity Passage2-9)	ln (LFQ Intensity Passage5-3)	ln (LFQ Intensity Passage5-6)	ln (LFQ Intensity Passage5-9)	ANOVA Significant	t-test Significant Adh-P2	t-test Significant_Adh-P5	t-test Significant__P2-P5	Razor + unique Peptides	Razor + unique Peptides Adherent3	Razor + unique Peptides Adherent6	Razor + unique Peptides Adherent9	Razor + unique Peptides Passage2-3	Razor + unique Peptides Passage2-6	Razor + unique Peptides Passage2-9	Razor + unique Peptides Passage5-3	Razor + unique Peptides Passage5-6	Razor + unique Peptides Passage5-9	Sequence Coverage [%]	Unique + Razor Sequence Coverage [%]	Mol. Weight [kDa]	PEP	LFQ Intensity Adherent3	LFQ Intensity Adherent6	LFQ Intensity Adherent9	Av.LFQ Intensity Adherent	LFQ Intensity Passage2-3	LFQ Intensity Passage2-6	LFQ Intensity Passage2-9	Av.LFQ Intensity Passage2	LFQ Intensity Passage5-3	LFQ Intensity Passage5-6	LFQ Intensity Passage5-9	Av.LFQ Intensity Passage5	ratio (Adh+1)/(P2+1)	ratio (Adh+1)/(P5+1)	ratio (P2+1)/(P5+1)	MS/MS Count Adherent3	MS/MS Count Adherent6	MS/MS Count Adherent9	MS/MS Count Passage2-3	MS/MS Count Passage2-6	MS/MS Count Passage2-9
3954	Exosome complex exonuclease MTR3;Exosome component 6;mRNA transport regulator 3 homolog;p11	26.3896	26.36	26.3183	25.7322	25.6102	25.6184	25.1754	25.1914	25.1814	+	+	+	+	3	2	3	3	2	3	2	2	3	2	15.4	15.4	28.235	3.9159e-27	87915000	86131000	83675000	85907000	55741000	51220000	51512000	5.28243e+07	37893000	38314000	38051000	38086000	1.62628	2.25561	1.38698	2	3	3	2	3	2
4224	KDEL motif-containing protein 2	22.606	23.8291	23.145	25.3812	25.3632	25.4415	26.1383	26.1589	26.1842	+	+	+	+	5	2	3	2	4	3	4	4	4	4	13.8	13.8	58.572	2.6212e-147	6383900	14903000	9275200	1.01874e+07	43702000	43161000	45569000	44144000	73863000	74925000	76246000	7.50113e+07	0.230776	0.135811	0.588498	2	5	3	6	7	7
5142	WD repeat-containing protein 33;WD repeat-containing protein WDC146	28.6434	29.2744	28.8648	26.6962	27.1136	27.5743	17.3646	17	16.9241	+	+	+	+	12	6	7	7	3	3	4	1	1	0	15.9	15.4	145.89	5.245e-60	419290000	649330000	488850000	5.19157e+08	108730000	145210000	199850000	1.51263e+08	0	0	0	0	3.43214	5.19157e+08	1.51263e+08	7	8	8	3	3	4
56	Putative uncharacterized protein FLNA	17.7699	16.9448	16.1733	16.8683	17.2672	16.9059	27.5273	27.8329	25.5313	+		+	+	2	1	1	1	1	1	1	2	2	2	49.3	0.6	245.86	0	0	0	0	0	0	0	0	0	193440000	239080000	48493000	1.60338e+08	1	6.23684e-09	6.23684e-09	2	2	2	2	3	1
2963	Carcinoembryonic antigen-related cell adhesion molecule 6;Non-specific crossreacting antigen;Normal cross-reacting antigen	16.3541	16.4555	17.9386	15.448	17.1224	18.1655	28.1599	28.4467	29.634	+		+	+	3	0	1	0	1	1	1	3	3	3	21.5	17.4	37.194	1.8121e-274	0	0	0	0	0	0	0	0	299900000	365850000	833180000	4.99643e+08	1	2.00143e-09	2.00143e-09	0	2	0	2	1	2
3630	Bleomycin hydrolase	24.7769	25.1076	24.821	24.7276	24.2723	24.3588	16.9254	17.5127	15.9605	+		+	+	4	2	3	2	2	2	3	1	1	1	12.3	12.3	52.562	1.8452e-10	28746000	36153000	29640000	31513000	27781000	20262000	21514000	2.31857e+07	0	0	0	0	1.35916	31513001	2.31857e+07	2	4	2	2	2	3
2721	Insulin-like growth factor-binding protein 3;cDNA FLJ43234 fis, clone HCHON2002964, highly similar to Insulin-like growth factor-binding protein 3;Insulin-like growth factor binding protein 3, isoform CRA_b;cDNA FLJ35128 fis, clone PLACE6008768, moderately similar to Insulin-like growth factor-binding protein 3;cDNA FLJ38655 fis, clone HHDPC2009208, highly similar to Insulin-like growth factor-bi…	17.8644	17.6544	15.9094	17.4646	17.3932	16.6576	26.0405	24.9231	26.4984	+		+	+	6	0	0	0	1	1	0	2	4	5	25.8	25.8	31.674	1.105e-20	0	0	0	0	0	0	0	0	69019000	31813000	94799000	6.52103e+07	1	1.5335e-08	1.5335e-08	0	0	0	1	1	0
1542	22 kDa pancornulin;Cornifin beta;Esophagin;Small proline-rich protein 3	17.1771	17.0216	16.1669	16.1604	16.6114	16.2119	25.3265	26.2646	25.8307	+		+	+	7	0	0	0	0	0	0	3	5	4	66.3	66.3	18.154	9.1682e-25	0	0	0	0	0	0	0	0	42076000	80621000	59680000	6.07923e+07	1	1.64494e-08	1.64494e-08	0	0	0	0	0	0
4333	RNA-binding protein RBP;Splicing factor 4	25.987	26.1426	26.4622	25.8727	25.1482	25.6404	17.2813	16.8931	14.7652	+		+	+	7	4	5	4	5	4	2	1	1	0	16.3	16.3	72.47	1.9625e-52	66508000	74083000	92454000	7.76817e+07	61442000	37184000	52302000	5.03093e+07	0	0	0	0	1.54408	7.76817e+07	5.03093e+07	5	6	6	6	5	2
1995	Enhancer of split groucho-like protein 3;Transducin-like enhancer protein 3;cDNA FLJ58232, highly similar to Transducin-like enhancer protein 3	26.5803	26.4095	27.6384	26.7502	27.4389	26.7261	16.8366	17.1429	17.406	+		+	+	10	6	3	8	4	4	3	1	1	1	21.5	21.5	84.477	2.975e-81	100340000	89139000	208920000	1.328e+08	112880000	181940000	111010000	1.35277e+08	0	0	0	0	0.981689	1.328e+08	1.35277e+08	7	3	8	5	4	3
3414	Gastric mucin;Lewis B blood group antigen;Major airway glycoprotein;Mucin-5 subtype AC, tracheobronchial;Mucin-5AC;Tracheobronchial mucin	16.5664	16.339	16.4817	16.3486	16.889	16.2022	28.5994	26.9067	28.2552	+		+	+	10	0	0	0	1	1	0	3	5	7	7.5	7.5	526.6	1.6567e-42	0	0	0	0	0	0	0	0	406700000	125810000	320370000	2.84293e+08	1	3.51749e-09	3.51749e-09	0	0	0	1	1	0
31	Monocyte protein 3;Protein strawberry notch homolog 1;Protein strawberry notch homolog 2	23.54	23.5816	23.0673	16.6607	17.17	16.6035	16.562	16.8839	16.8924	+	+	+		2	2	2	2	0	1	0	0	0	0	1.9	1.9	154.31	8.9578e-05	12197000	12554000	8789300	11180100	0	0	0	0	0	0	0	0	11180101	11180101	1	2	2	2	0	1	0
1541	Another new gene 1 protein;C-14 sterol reductase;Delta(14)-sterol reductase;Putative sterol reductase SR-1;Sterol C14-reductase;Transmembrane 7 superfamily member 2	16.5689	17.2953	17.273	25.0764	24.8669	24.7836	25.0982	25.2293	24.8073	+	+	+		2	1	1	1	2	2	2	2	2	2	5.5	5.5	46.405	2.9862e-19	0	0	0	0	35378000	30598000	28880000	3.16187e+07	35917000	39334000	29360000	3.48703e+07	3.16269e-08	2.86777e-08	0.90675	1	1	1	2	2	2
2045	Uroplakin II;Uroplakin-2	15.7585	16.1797	16.8295	24.7905	24.2543	23.9736	24.8533	25.0217	24.5931	+	+	+		2	0	1	0	2	2	2	2	2	2	12	12	19.438	0.0017212	0	0	0	0	29019000	20011000	16473000	2.18343e+07	30310000	34063000	25308000	2.98937e+07	4.57994e-08	3.34519e-08	0.7304	0	0	0	2	2	2
2624	Ras-related protein Ral-A	28.0166	27.8191	28.0408	27.0831	27.3036	27.3109	27.3184	27.4275	27.2452	+	+	+		2	2	2	2	2	2	2	2	2	2	25.2	14.1	23.567	6.1512e-75	271550000	236800000	276140000	2.61497e+08	142180000	165650000	166490000	1.58107e+08	167360000	180510000	159080000	1.68983e+08	1.65393	1.54747	0.935635	3	3	3	3	3	3
3104	Guanine nucleotide-binding protein alpha-q;Guanine nucleotide-binding protein G(q) subunit alpha;Guanine nucleotide binding protein (G protein), q polypeptide	25.1007	25.7413	25.0503	16.2255	16.4599	16.1404	17.0782	17.3133	14.5294	+	+	+		2	2	2	2	0	1	1	0	1	1	17.3	10	42.142	6.5216e-94	35980000	56091000	34745000	42272000	0	0	0	0	0	0	0	0	42272001	42272001	1	2	2	2	0	1	1
3497	Bcl-2-like protein 3;Bcl-2-related protein EAT/mcl1;Induced myeloid leukemia cell differentiation protein Mcl-1;mcl1/EAT	25.4643	26.0793	25.4621	15.7127	17.4082	16.5909	16.2679	16.9364	17.5658	+	+	+		2	2	2	2	1	1	0	1	1	1	8.9	8.9	37.337	8.1505e-09	46294000	70903000	46222000	54473000	0	0	0	0	0	0	0	0	54473001	54473001	1	2	2	2	1	1	0
5290	Cysteine--tRNA ligase;Probable cysteinyl-tRNA synthetase, mitochondrial	24.8948	25.5965	24.9315	17.3062	16.3143	16.4922	16.7385	17.6085	16.7987	+	+	+		2	2	2	2	0	0	0	0	1	0	4.6	4.6	62.223	0.00010031	31194000	50736000	31999000	3.79763e+07	0	0	0	0	0	0	0	0	3.79763e+07	3.79763e+07	1	2	2	2	0	0	0
437	39S ribosomal protein L48, mitochondrial;cDNA FLJ60720, highly similar to Homo sapiens mitochondrial ribosomal protein L48 (MRPL48), transcript variant 1, mRNA	26.6982	25.9724	25.5327	18.0896	17.4702	16.1298	17.5542	15.2456	16.5351	+	+	+		3	2	2	3	1	1	0	1	1	1	17	17	23.934	1.5818e-29	108880000	65837000	48542000	7.44197e+07	0	0	0	0	0	0	0	0	7.44197e+07	7.44197e+07	1	3	2	3	1	1	0
467	Epididymal secretory protein E1;Human epididymis-specific protein 1;Niemann-Pick disease type C2 protein;cDNA FLJ51947, highly similar to Epididymal secretory protein E1	16.577	17.0961	15.9154	27.0275	26.1726	25.7729	27.5154	27.2953	25.0256	+	+	+		3	1	1	1	2	2	2	2	3	2	21.7	21.7	23.699	9.8235e-171	0	0	0	0	136800000	75639000	57335000	8.99247e+07	191850000	164700000	34156000	1.30235e+08	1.11204e-08	7.67841e-09	0.690478	1	1	1	3	2	2
1171	Splicing factor, arginine/serine-rich 10;Transformer-2 protein homolog B;Transformer-2 protein homolog beta	27.0064	27.6254	26.9095	17.1713	15.9601	17.0201	16.5278	16.3852	16.3353	+	+	+		3	3	2	3	0	0	1	0	1	0	12.8	12.8	33.665	1.3164e-49	134810000	207050000	126060000	1.55973e+08	0	0	0	0	0	0	0	0	1.55973e+08	1.55973e+08	1	3	2	4	0	0	1
1287	Intestinal trefoil factor;Polypeptide P1.B;Trefoil factor 3	15.9359	18.1394	16.0676	28.9123	28.0714	26.3502	28.9382	27.8254	26.7935	+	+	+		3	0	1	0	3	3	3	3	3	2	33	33	10.181	1.1621e-11	0	0	0	0	505220000	282060000	85545000	2.90942e+08	514340000	237840000	116320000	289500000	3.43712e-09	3.45423e-09	1.00498	0	1	0	4	4	3
3227	ATP synthase subunit e, mitochondrial	27.7715	27.5107	27.7819	28.6714	28.8214	28.4522	29.121	29.1314	29.0222	+	+	+		3	2	3	2	2	3	3	3	3	3	37.7	37.7	7.9331	1.245e-29	229110000	191220000	230770000	2.17033e+08	427500000	474370000	367250000	423040000	583820000	588060000	545210000	5.72363e+08	0.513033	0.379188	0.739111	5	6	5	6	9	6
3507	Antigenic surface determinant protein OA3;Integrin-associated protein;Leukocyte surface antigen CD47;Protein MER6	26.3353	26.1595	26.9326	17.4908	15.9945	15.3613	17.1994	17.4543	17.9124	+	+	+		3	2	2	3	1	1	0	1	1	0	9	9	35.213	1.1266e-09	84665000	74952000	128090000	9.59023e+07	0	0	0	0	0	0	0	0	9.59023e+07	9.59023e+07	1	3	2	3	1	1	0
4306	Developmentally-regulated RNA-binding protein 1;RNA-binding motif protein 45;RNA-binding protein 45	26.5586	26.853	26.7571	16.7882	16.5023	16.2868	16.5381	16.8956	17.3108	+	+	+		3	2	3	2	1	1	1	1	1	1	8.4	8.4	53.502	8.5258e-13	98839000	121220000	113420000	1.1116e+08	0	0	0	0	0	0	0	0	1.1116e+08	1.1116e+08	1	2	3	2	1	1	1
4593	IRS-1 PH domain-binding protein;PH-interacting protein;WD repeat-containing protein 11	25.5049	25.5552	24.5769	15.6071	15.1184	16.7206	17.4137	16.8996	16.5231	+	+	+		3	2	3	3	0	0	0	0	0	0	2.3	2.3	206.69	3.6564e-09	47614000	49303000	25025000	4.06473e+07	0	0	0	0	0	0	0	0	4.06473e+07	4.06473e+07	1	2	3	3	0	0	0
4832	MLL partner containing FYVE domain;Zinc finger FYVE domain-containing protein 19	27.0965	27.4356	27.5195	28.9992	28.6176	28.3986	28.0963	28.3906	28.5009	+	+	+		3	3	3	2	3	3	3	3	3	3	8.7	8.7	51.546	3.1883e-20	143500000	181530000	192390000	1.72473e+08	536580000	411860000	353850000	4.34097e+08	286970000	351890000	379870000	3.39577e+08	0.397315	0.507907	1.27835	4	4	2	4	3	3
4952	EBNA1-binding protein 2;Nucleolar protein p40;Probable rRNA-processing protein EBP2	25.9872	26.2378	26.198	18.79	18.4002	15.8017	16.5366	17.3088	15.5787	+	+	+		3	3	3	2	1	1	1	1	1	1	12.4	12.4	34.852	8.3541e-43	66517000	79132000	76979000	7.42093e+07	0	0	0	0	0	0	0	0	7.42093e+07	7.42093e+07	1	3	4	3	1	1	1
4997	Endogenous carboxypeptidase inhibitor;Latexin;MUM;Tissue carboxypeptidase inhibitor	29.7619	29.7191	29.538	30.4586	30.3737	30.1169	30.8634	30.5245	31.1444	+	+	+		3	2	2	2	3	2	3	3	2	3	16.7	16.7	25.75	1.5567e-86	910370000	883790000	779530000	8.57897e+08	1475500000	1391200000	1164400000	1343700000	1953500000	1544500000	2373500000	1.95717e+09	0.638458	0.438336	0.686554	5	5	5	8	6	8
581	cDNA FLJ58780, highly similar to Homo sapiens lysosomal-associated membrane protein 2 (LAMP2), transcript variant LAMP2B, mRNA;CD107 antigen-like family member B;Lysosome-associated membrane glycoprotein 2;cDNA FLJ52540, highly similar to Lysosome-associated membrane glycoprotein 2	28.8038	28.7056	28.7468	29.6158	29.5996	29.3952	29.9908	29.6231	29.8925	+	+	+		4	3	4	3	3	2	2	3	3	3	9	9	44.955	7.2592e-38	468620000	437760000	450460000	452280000	822690000	813540000	706070000	7.80767e+08	1066900000	826890000	996670000	9.63487e+08	0.579277	0.46942	0.810355	6	8	5	7	6	3
615	Putative uncharacterized protein C2orf43;UPF0554 protein C2orf43;cDNA, FLJ79209;cDNA, FLJ79061;cDNA, FLJ79103	24.5944	24.4205	24.5518	16.8722	15.8166	16.6548	16.7904	17.0288	17.0343	+	+	+		4	2	2	2	1	2	2	1	0	0	17.8	17.8	42.668	6.755e-22	25331000	22454000	24594000	2.41263e+07	0	0	0	0	0	0	0	0	2.41263e+07	2.41263e+07	1	2	2	2	1	2	1
646	Protein NDRG3;cDNA FLJ54521, highly similar to Protein NDRG3;NDRG family member 3;NDRG family member 3, isoform CRA_c	26.4241	26.1397	26.6363	27.2733	27.1335	27.2412	27.4369	27.4134	27.2904	+	+	+		4	2	2	2	3	3	4	4	4	3	17.3	17.3	41.408	5.5474e-125	90045000	73935000	104310000	89430000	162210000	147230000	158640000	1.56027e+08	181690000	178750000	164150000	1.74863e+08	0.573171	0.511428	0.892278	2	2	3	3	3	4
778	RNA-binding motif protein 12B;RNA-binding protein 12B;Putative uncharacterized protein RBM12B	25.3856	25.3616	25.321	15.2691	17.4112	16.952	16.7829	17.4118	17.3509	+	+	+		4	3	3	2	0	0	0	0	0	0	5.4	5.4	118.1	6.859e-13	43836000	43112000	41915000	4.29543e+07	0	0	0	0	0	0	0	0	4.29543e+07	4.29543e+07	1	3	5	2	0	0	0
1497	TLD domain-containing protein KIAA1609	17.9734	15.8895	17.3923	27.9519	27.1034	27.9497	28.6232	27.9235	28.1292	+	+	+		4	1	1	1	3	2	2	2	3	3	13.4	13.4	50.993	2.7112e-39	0	0	0	0	259630000	144190000	259240000	221020000	413470000	254580000	293590000	3.20547e+08	4.52448e-09	3.11967e-09	0.68951	2	2	2	4	2	3
1954	4-alpha-hydroxy-tetrahydropterin dehydratase 2;DcoH-like protein DCoHm;Dimerization cofactor of hepatocyte nuclear factor 1 from muscle;HNF-1-alpha dimerization cofactor;Pterin-4-alpha-carbinolamine dehydratase 2	27.0973	26.4403	27.1232	28.6354	28.7994	28.7217	29.1132	28.1846	29.2612	+	+	+		4	3	2	4	3	3	3	2	3	2	36.2	36.2	14.365	3.806e-100	143580000	91057000	146180000	126939000	416970000	467170000	442670000	442270000	580690000	305070000	643430000	509730000	0.287017	0.249032	0.867655	4	2	4	4	4	4
3223	Novel nuclear protein 1;Nucleolar protein Nop52;Ribosomal RNA processing protein 1 homolog A;RRP1-like protein	26.4938	26.9716	26.3813	17.6441	16.4892	16.5814	17.0575	17.198	16.6003	+	+	+		4	3	4	2	1	0	1	0	0	0	12.1	12.1	52.839	1.3099e-25	94497000	131600000	87412000	104503000	0	0	0	0	0	0	0	0	104503001	104503001	1	6	5	3	1	0	1
3667	Guanidinoacetate N-methyltransferase;cDNA FLJ76206, highly similar to Homo sapiens guanidinoacetate N-methyltransferase (GAMT), transcript variant 2, mRNA;Guanidinoacetate N-methyltransferase, isoform CRA_a	24.4397	24.5097	25.0466	26.3119	26.3218	26.2083	26.2847	26.2874	26.3155	+	+	+		4	2	3	3	4	2	4	4	4	4	22	22	26.318	3.2764e-81	22755000	23886000	34657000	2.70993e+07	83308000	83876000	77533000	8.15723e+07	81749000	81900000	83515000	82388000	0.332212	0.328923	0.9901	2	4	3	4	2	5
3724	Bromodomain-containing protein 3;RING3-like protein	25.6348	26.1342	25.2802	17.39	17.3021	17.7568	16.64	16.4386	17.1578	+	+	+		4	2	2	3	1	0	1	0	0	0	10.7	6.5	79.541	1.3848e-44	52099000	73652000	40746000	55499000	0	0	0	0	0	0	0	0	55499001	55499001	1	2	2	3	1	0	1
3969	SH3 domain-binding glutamic acid-rich-like protein 3;SH3 domain-binding protein 1;SH3 domain binding glutamic acid-rich protein like 3	28.854	28.8335	28.9814	29.8461	30.1015	30.023	30.3725	29.9661	30.2677	+	+	+		4	3	3	2	3	3	2	3	3	2	32.3	32.3	10.438	3.3842e-107	485200000	478360000	530000000	4.97853e+08	965080000	1152000000	1091000000	1069360000	1390100000	1048800000	1292700000	1.24387e+09	0.465562	0.400247	0.859706	4	4	3	4	4	3
4106	Integrator complex subunit 5	26.8113	25.8558	25.3483	16.0344	16.7993	16.7045	18.3721	16.2144	16.8685	+	+	+		4	2	2	4	1	0	0	0	0	0	5	5	107.99	4.8775e-07	117760000	60726000	42716000	73734000	0	0	0	0	0	0	0	0	73734001	73734001	1	2	2	4	1	0	0
4619	Histone H1x	29.496	29.4451	29.0766	28.0902	28.4601	28.2856	27.951	27.1918	27.2852	+	+	+		4	4	4	3	3	3	3	3	2	3	23.9	23.9	22.487	3.6146e-48	757160000	730900000	566130000	684730000	285750000	369280000	327190000	3.27407e+08	259480000	153300000	163560000	1.92113e+08	2.09137	3.5642	1.70424	11	7	8	5	5	7
4955	Serine/threonine-protein kinase VRK1;Vaccinia-related kinase 1	26.7128	27.3567	27.1234	17.0221	17.4791	15.0278	16.2641	17.1439	15.7162	+	+	+		4	3	4	3	1	1	0	0	0	0	15.2	15.2	45.476	1.204e-33	109990000	171870000	146200000	1.42687e+08	0	0	0	0	0	0	0	0	1.42687e+08	1.42687e+08	1	3	6	3	1	1	0
4986	Programmed cell death protein 2-like	22.7161	23.6176	22.5226	15.7	16.9357	17.2371	15.8993	16.5844	17.6864	+	+	+		4	2	2	2	3	1	1	1	1	1	18.2	18.2	39.416	1.8956e-20	6890200	12871000	6025500	8.59557e+06	0	0	0	0	0	0	0	0	8.59557e+06	8.59557e+06	1	2	3	3	3	2	4
5738	Protein kinase C and casein kinase substrate in neurons protein 2	27.1444	27.064	27.2904	27.7913	27.8681	27.7303	27.843	28.0019	28.0186	+	+	+		4	3	3	3	3	3	3	4	3	3	11.5	11.5	55.738	1.6417e-75	148350000	140310000	164140000	1.50933e+08	232280000	244990000	222660000	233310000	240760000	268780000	271920000	2.60487e+08	0.646922	0.579428	0.89567	3	3	3	4	3	3
5760	Paraplegin;Spastic paraplegia 7 protein	24.9196	25.5171	25.231	15.9202	16.3956	16.1677	16.7528	16.5285	17.441	+	+	+		4	2	2	3	2	1	0	0	0	0	10.3	10.3	88.234	6.9288e-61	31735000	48020000	39381000	39712000	0	0	0	0	0	0	0	0	39712001	39712001	1	2	2	3	2	1	0
219	Putative uncharacterized protein SRRM1;Serine/arginine repetitive matrix 1;Ser/Arg-related nuclear matrix protein;Serine/arginine repetitive matrix protein 1;SR-related nuclear matrix protein of 160 kDa	28.7271	28.7314	28.785	26.7998	27.5105	27.2094	27.0766	26.7506	26.7466	+	+	+		5	3	5	4	3	3	4	3	5	4	9.5	9.5	103.79	1.4673e-121	444350000	445670000	462540000	4.50853e+08	116830000	191200000	155180000	1.54403e+08	141540000	112910000	112600000	122350000	2.91997	3.68495	1.26198	6	9	8	3	5	5
414	Mitochondrial ornithine transporter 1;Solute carrier family 25 member 15;cDNA FLJ51231, highly similar to Mitochondrial ornithine transporter 1	27.2288	26.7455	25.404	15.9957	16.8935	16.9586	17.1999	17.9259	17.6561	+	+	+		5	3	3	3	1	1	0	1	1	2	23.3	23.3	32.736	1.9505e-30	157280000	112510000	44398000	1.04729e+08	0	0	0	0	0	0	0	0	1.04729e+08	1.04729e+08	1	4	4	3	1	1	0
441	ATP-dependent metalloprotease FtsH1;ATP-dependent metalloprotease YME1L1;Meg-4;Presenilin-associated metalloprotease;YME1-like protein 1;YME1-like 1 (S. cerevisiae);cDNA FLJ58153, highly similar to ATP-dependent metalloprotease YME1L1 (EC 3.4.24.-);YME1-like 1 (S. cerevisiae), isoform CRA_c	25.7865	25.7319	25.5216	17.0675	16.7386	16.6405	16.7633	16.0057	17.4066	+	+	+		5	3	3	3	0	0	1	0	0	0	9.4	9.4	86.454	6.1704e-34	57876000	55727000	48170000	5.39243e+07	0	0	0	0	0	0	0	0	5.39243e+07	5.39243e+07	1	3	3	3	0	0	1
574	Pre-mRNA-splicing factor SRP20;Splicing factor, arginine/serine-rich 3;cDNA FLJ52832, highly similar to Splicing factor, arginine/serine-rich 3;Splicing factor, arginine/serine-rich 3, isoform CRA_a	30.8288	30.9208	30.5043	29.9578	30.0987	29.8563	29.7074	29.4789	29.4114	+	+	+		5	4	4	5	3	3	4	3	4	4	28.7	28.7	19.329	4.8698e-106	1907200000	2032700000	1523000000	1.82097e+09	1042800000	1149800000	971940000	1.05485e+09	876660000	748210000	714010000	7.79627e+08	1.72629	2.33569	1.35302	9	11	9	6	5	5
623	KINDLIN2 isoform 2;Fermitin family homolog 2;Kindlin-2;Mitogen-inducible gene 2 protein;Pleckstrin homology domain-containing family C member 1	17.527	16.8846	16.0802	25.3619	25.9973	26.3707	25.3426	25.6562	25.969	+	+	+		5	1	1	1	2	3	2	3	4	3	11.9	11.9	78.675	3.6647e-14	0	0	0	0	43121000	66981000	86768000	6.56233e+07	42549000	52878000	65681000	5.37027e+07	1.52385e-08	1.8621e-08	1.22198	1	1	1	2	3	3
1312	Rabphilin-11;WD repeat-containing protein 44	17.9261	17.395	16.164	25.6823	25.3771	26.0034	25.5517	25.9672	25.0995	+	+	+		5	0	1	1	5	3	3	3	3	2	7	7	101.37	1.5714e-32	0	0	0	0	53846000	43578000	67267000	54897000	49183000	65599000	35949000	5.02437e+07	1.82159e-08	1.9903e-08	1.09262	0	2	1	7	3	4
1402	GTP-binding protein 7;Mitochondrial GTPase 1;cDNA FLJ43022 fis, clone BRTHA2018591, highly similar to Homo sapiens mitochondrial GTPase 1 homolog (MTG1), mRNA	24.9758	25.7351	23.626	15.6509	16.6491	16.8025	17.9539	16.3885	18.2111	+	+	+		5	3	5	2	1	1	0	1	0	0	22.1	22.1	37.186	3.1751e-16	32996000	55852000	12946000	3.39313e+07	0	0	0	0	0	0	0	0	3.39313e+07	3.39313e+07	1	4	7	2	1	1	0
2860	GTP cyclohydrolase 1 feedback regulatory protein;GTP cyclohydrolase I feedback regulatory protein;p35;GCHFR protein	16.8424	17.9177	17.5379	29.4093	29.2933	29.2227	28.6705	28.7735	28.898	+	+	+		5	1	0	1	5	3	3	4	5	3	91.7	91.7	9.6981	2.1359e-70	0	0	0	0	713000000	657910000	626460000	665790000	427250000	458860000	500220000	462110000	1.50198e-09	2.16399e-09	1.44076	1	0	1	7	4	4
2986	Actin-related protein 1B;Beta-centractin	17.2067	17.3912	16.057	26.3343	26.6491	26.7829	26.4709	27.112	26.5819	+	+	+		5	0	1	0	3	3	3	3	4	3	40.7	18.6	42.293	6.5883e-138	0	0	0	0	84610000	105240000	115470000	1.01773e+08	93014000	145050000	100450000	112838000	9.82576e-09	8.86226e-09	0.901942	0	1	0	3	3	3
3131	Dual specificity protein phosphatase 3;Dual specificity protein phosphatase VHR;DUSP3 protein	26.6068	26.3719	26.698	28.1731	28.2303	28.4118	28.5476	28.6722	28.9175	+	+	+		5	2	2	4	4	4	5	5	5	4	33.5	33.5	20.478	5.2737e-136	102200000	86842000	108870000	99304000	302650000	314890000	357120000	3.24887e+08	392370000	427750000	507040000	4.42387e+08	0.305657	0.224473	0.734395	3	2	5	7	6	7
3382	Caspase and RIP adapter with death domain;Death domain-containing protein CRADD;RIP-associated protein with a death domain;cDNA FLJ50762, highly similar to Death domain-containing protein CRADD	16.8897	17.2222	16.9683	26.1714	25.5407	26.2698	26.159	26.1561	26.3599	+	+	+		5	0	1	1	2	2	2	4	3	2	29.6	29.6	22.745	9.0502e-70	0	0	0	0	75573000	48811000	80910000	6.84313e+07	74926000	74776000	86123000	7.86083e+07	1.46132e-08	1.27213e-08	0.870535	0	1	1	3	2	3
3681	Interferon regulatory factor 3;Interferon regulatory factor 3 nirs variant 3	16.8914	15.848	16.806	26.6193	26.7866	27.4501	26.4864	26.8176	27.268	+	+	+		5	1	0	0	2	2	5	3	4	3	23.7	23.7	47.219	2.5493e-68	0	0	0	0	103090000	115760000	183360000	134070000	94016000	118280000	161620000	1.24639e+08	7.45879e-09	8.02319e-09	1.07567	1	0	0	3	2	7
3720	Ribosome biogenesis regulatory protein homolog	27.6621	27.2619	26.5407	16.1894	15.9098	17.4458	17.615	16.8339	16.9223	+	+	+		5	3	5	4	0	1	0	0	0	0	23.3	23.3	41.193	5.5428e-51	212390000	160930000	97620000	156980000	0	0	0	0	0	0	0	0	156980001	156980001	1	4	7	4	0	1	0
4656	68 kDa TATA-binding protein-associated factor;RNA-binding protein 56;TATA-binding protein-associated factor 2N	27.3585	27.6642	27.85	25.1607	26.241	25.3287	25.9981	25.6862	25.2503	+	+	+		5	5	4	4	2	3	2	3	2	2	12.5	12.5	61.829	0	172080000	212690000	241930000	208900000	37507000	79309000	42140000	5.29853e+07	67022000	53991000	39912000	5.36417e+07	3.9426	3.89436	0.987764	8	6	6	2	3	2
4816	GDP-mannose pyrophosphorylase A;GTP-mannose-1-phosphate guanylyltransferase alpha;Mannose-1-phosphate guanyltransferase alpha	28.8811	28.6669	28.7572	30.0347	29.6107	29.6281	29.9424	29.6912	30.0569	+	+	+		5	2	2	3	3	4	3	4	4	4	16.1	16.1	52.017	4.5445e-164	494390000	426180000	453710000	4.58093e+08	1099900000	819780000	829760000	916480000	1031700000	866870000	1116900000	1.00516e+09	0.49984	0.455743	0.911778	4	5	7	7	8	7
5259	Brix domain-containing protein 1;Ribosome biogenesis protein RPF2 homolog;Ribosome production factor 2 homolog;Brix domain containing 1	25.5482	25.6095	26.2953	17.7868	17.0462	15.7553	16.8005	17.4546	16.5719	+	+	+		5	3	3	3	0	0	0	0	0	0	19.6	19.6	35.582	1.2881e-30	49065000	51195000	82352000	6.08707e+07	0	0	0	0	0	0	0	0	6.08707e+07	6.08707e+07	1	3	3	4	0	0	0
5293	Nicotinamide mononucleotide adenylyltransferase 1;Nicotinate-nucleotide adenylyltransferase 1	24.9185	25.3103	24.7779	16.4612	16.4746	16.8438	16.9728	16.5107	17.5492	+	+	+		5	3	3	2	2	1	0	0	1	1	24.4	24.4	31.932	1.1315e-07	31711000	41606000	28767000	34028000	0	0	0	0	0	0	0	0	34028001	34028001	1	3	3	2	2	1	0
5400	14 kDa phosphohistidine phosphatase;Phosphohistidine phosphatase 1;Protein janus-A homolog	29.908	29.6814	30.1814	31.2511	31.3744	31.2417	31.4059	31.0721	31.3861	+	+	+		5	3	5	5	5	5	5	5	5	5	44	44	13.832	8.123e-175	1007400000	861000000	1217600000	1.02867e+09	2555800000	2783800000	2539200000	2.62627e+09	2845300000	2257500000	2806500000	2.63643e+09	0.391684	0.390174	0.996144	4	7	9	11	11	11
5403	Protein FAM114A2;cDNA FLJ38127 fis, clone D6OST2000245	17.2628	16.9862	16.5767	24.1509	24.2688	24.2364	24.3191	24.6894	24.414	+	+	+		5	1	1	1	3	2	2	2	2	4	15.4	15.4	55.468	2.1047e-14	0	0	0	0	18627000	20213000	19764000	1.95347e+07	20930000	27055000	22354000	2.34463e+07	5.1191e-08	4.26506e-08	0.833165	1	1	2	3	3	2
5475	H/ACA ribonucleoprotein complex subunit 2;Nucleolar protein family A member 2;snoRNP protein NHP2	29.0254	29.6938	29.2105	27.5313	27.8468	27.286	27.7648	27.7533	27.1026	+	+	+		5	3	4	4	3	2	2	2	2	4	54.2	54.2	17.201	5.4824e-117	546410000	868400000	621190000	6.78667e+08	193980000	241390000	163650000	1.99673e+08	228060000	226250000	144110000	1.99473e+08	3.39888	3.40229	1.001	5	7	7	3	3	2
5672	Alpha-crystallin C chain;E2-induced gene 1 protein;Heat shock protein beta-8;Protein kinase H11;Small stress protein-like protein HSP22	30.0767	30.869	30.7751	28.9407	29.0611	28.8128	29.2683	29.4913	29.0035	+	+	+		5	5	4	3	3	3	2	3	4	3	30.1	30.1	21.604	1.7869e-53	1132400000	1961100000	1837500000	1.64367e+09	515250000	560090000	471550000	515630000	646600000	754690000	538160000	6.46483e+08	3.18769	2.54247	0.797592	8	6	5	3	3	3
261	cDNA FLJ56152, highly similar to Rho guanine nucleotide exchange factor 7;Rho guanine nucleotide exchange factor (GEF) 7;Beta-Pix;COOL-1;p85;PAK-interacting exchange factor beta;Rho guanine nucleotide exchange factor 7	16.9047	16.6417	15.5024	24.9827	25.725	26.0669	25.8144	26.0321	26.1056	+	+	+		6	0	0	1	2	2	3	5	3	3	15.7	15.7	82.57	1.4906e-11	0	0	0	0	33155000	55462000	70295000	5.29707e+07	59008000	68617000	72203000	6.66093e+07	1.88784e-08	1.50129e-08	0.795244	0	0	1	2	2	3
704	51 kDa FK506-binding protein;54 kDa progesterone receptor-associated immunophilin;Androgen-regulated protein 6;FF1 antigen;FK506-binding protein 5;FKBP54;HSP90-binding immunophilin;Peptidyl-prolyl cis-trans isomerase FKBP5;Rotamase;cDNA FLJ58213, highly similar to FK506-binding protein 5 (EC 5.2.1.8);cDNA FLJ57237, highly similar to FK506-binding protein 5 (EC 5.2.1.8)	28.2616	25.7553	26.4983	16.5818	15.0837	16.1349	16.1424	17.8425	17.4938	+	+	+		6	3	6	2	2	1	1	1	1	0	17.5	17.5	51.212	4.6851e-39	321800000	56638000	94798000	1.57745e+08	0	0	0	0	0	0	0	0	1.57745e+08	1.57745e+08	1	3	6	3	1	1	1
1225	B-CK;Creatine kinase B chain;Creatine kinase B-type	16.4886	16.9158	16.9612	26.2282	26.6462	27.3212	26.3574	25.7931	26.6919	+	+	+		6	0	0	0	3	3	4	2	2	3	29.9	29.9	42.644	3.4071e-10	0	0	0	0	78607000	105030000	167690000	117109000	85973000	58144000	108410000	8.41757e+07	8.53905e-09	1.18799e-08	1.39125	0	0	0	3	3	4
1570	Anaphase-promoting complex subunit 5;Cyclosome subunit 5	25.6393	26.0936	25.9703	16.6452	15.9521	16.2822	15.982	16.8182	16.7216	+	+	+		6	4	4	4	1	1	0	1	1	0	10.6	10.6	85.076	4.8172e-37	52265000	71605000	65742000	63204000	0	0	0	0	0	0	0	0	63204001	63204001	1	5	5	4	1	1	0
1806	Arylsulfatase A;Arylsulfatase A component B;Arylsulfatase A component C;Cerebroside-sulfatase	17.0323	18.0952	17.774	27.3986	27.0711	26.986	26.8038	27.3957	27.5898	+	+	+		6	0	1	1	2	6	5	4	5	3	18.7	18.7	53.588	1.5421e-50	0	0	0	0	176930000	141000000	132920000	1.50283e+08	117150000	176580000	202000000	1.65243e+08	6.6541e-09	6.05168e-09	0.909467	0	1	1	4	6	6
2611	Microsomal glutathione S-transferase 1;Microsomal GST-I	26.4754	27.3678	27.458	29.2391	29.21	28.7172	29.1629	29.2107	29.2697	+	+	+		6	4	3	4	4	6	5	5	5	5	30.3	30.3	17.598	7.4215e-118	93303000	173190000	184360000	1.50284e+08	633630000	620990000	441300000	5.65307e+08	601060000	621300000	647220000	6.23193e+08	0.265846	0.241152	0.907113	4	3	6	6	8	7
2827	13 kDa FK506-binding protein;FK506-binding protein 2;Immunophilin FKBP13;Peptidyl-prolyl cis-trans isomerase FKBP2;Rotamase	27.6855	28.2254	27.7151	29.5548	29.9134	29.3126	29.7953	29.7672	29.6338	+	+	+		6	3	4	5	5	5	6	5	5	5	38.7	38.7	15.649	1.7075e-85	215860000	313820000	220330000	2.50003e+08	788630000	1011200000	666770000	822200000	931700000	913710000	833060000	8.92823e+08	0.304066	0.280014	0.920899	3	6	6	8	8	10
3453	Dual specificity mitogen-activated protein kinase kinase 1;ERK activator kinase 1;MAPK/ERK kinase 1	25.9621	26.0385	26.0997	27.7197	27.738	28.0416	27.9812	27.9042	28.2324	+	+	+		6	2	2	3	3	4	3	3	4	3	39.9	23.7	43.439	7.0852e-164	65367000	68925000	71909000	6.87337e+07	221040000	223850000	276290000	2.40393e+08	264960000	251190000	315350000	2.77167e+08	0.285922	0.247987	0.867324	2	2	3	6	6	6
3741	Nicotinate-nucleotide pyrophosphorylase [carboxylating];Quinolinate phosphoribosyltransferase [decarboxylating];Putative uncharacterized protein QPRT	27.8175	27.3323	27.5458	30.868	30.386	29.8744	30.7638	30.1971	30.2773	+	+	+		6	2	2	2	6	6	6	6	6	5	38.4	38.4	30.845	3.7839e-206	236530000	168980000	195930000	200480000	1959700000	1403100000	984190000	1.449e+09	1823200000	1230900000	1301300000	1451800000	0.138358	0.138091	0.998069	3	2	3	11	11	9
3869	Mitochondrial import inner membrane translocase subunit TIM50;TIM50L;TIMM50 protein	28.7259	28.8321	28.5303	27.7885	27.7101	27.7959	27.5542	27.3613	27.5345	+	+	+		6	6	6	4	3	4	3	5	4	4	16.9	16.9	50.464	6.5847e-95	443980000	477880000	387680000	4.36513e+08	231830000	219570000	233030000	2.28143e+08	197080000	172410000	194410000	1.87967e+08	1.91333	2.32229	1.21374	9	11	6	5	5	4
4236	UPF0469 protein KIAA0907	25.8819	25.8455	25.4339	16.3052	17.4953	16.1169	16.8093	17.3974	17.6803	+	+	+		6	4	3	3	1	1	0	0	2	1	24.8	24.8	64.845	3.0966e-17	61835000	60295000	45327000	55819000	0	0	0	0	0	0	0	0	55819001	55819001	1	4	3	3	1	1	0
4253	Nuclear poly(A)-binding protein 1;Poly(A)-binding protein II;Polyadenylate-binding nuclear protein 1;Polyadenylate-binding protein 2;cDNA FLJ57714, highly similar to Poly(A)-binding protein 2	30.511	30.1241	30.2919	29.3076	28.9933	29.1173	28.9663	29.1932	29.4196	+	+	+		6	3	6	5	3	6	5	5	5	3	31.4	31.4	32.749	3.34e-156	1530100000	1170200000	1314500000	1.33827e+09	664450000	534400000	582330000	5.93727e+08	524460000	613790000	718090000	618780000	2.25401	2.16275	0.959512	17	17	17	12	13	10
4393	Pyridine nucleotide-disulfide oxidoreductase domain-containing protein 2	26.3851	26.5865	26.038	17.2124	15.9017	17.0149	16.645	17.481	17.1241	+	+	+		6	3	5	3	1	0	1	0	0	1	18.2	18.2	63.067	6.495e-32	87641000	100770000	68902000	85771000	0	0	0	0	0	0	0	0	85771001	85771001	1	3	5	3	1	0	1
4508	Ganglioside-induced differentiation-associated protein 1	25.3767	26.2032	25.9286	17.2904	15.5965	17.5296	15.8685	16.633	16.6973	+	+	+		6	3	4	4	0	0	1	1	1	0	19.6	19.6	41.345	3.9948e-15	43567000	77257000	63868000	61564000	0	0	0	0	0	0	0	0	61564001	61564001	1	3	4	4	0	0	1
5007	Rhotekin	16.7768	17.9241	17.9825	26.4212	26.2824	26.501	26.6659	26.6373	27.0495	+	+	+		6	1	0	1	4	3	3	3	5	3	17.6	17.6	62.667	4.6253e-24	0	0	0	0	89860000	81617000	94970000	8.88157e+07	106470000	104380000	138900000	1.16583e+08	1.12593e-08	8.57756e-09	0.761821	1	0	1	5	3	3
5453	Integrator complex subunit 10	26.3129	25.291	25.4618	17.0606	17.8634	16.4867	18.1023	16.3907	16.6526	+	+	+		6	3	4	3	1	0	1	1	0	0	13.7	13.7	82.235	4.0136e-42	83360000	41053000	46214000	5.68757e+07	0	0	0	0	0	0	0	0	5.68757e+07	5.68757e+07	1	3	4	3	1	0	1
5614	Leucine-rich repeat and WD repeat-containing protein 1	25.8779	25.8513	26.2237	17.3164	17.3906	16.4215	17.2418	16.9145	18.0599	+	+	+		6	4	3	3	0	1	0	0	1	0	15	15	70.86	3.7127e-11	61663000	60538000	78366000	6.68557e+07	0	0	0	0	0	0	0	0	6.68557e+07	6.68557e+07	1	4	3	3	0	1	0
5841	FIS1 homolog;Mitochondrial fission 1 protein;Tetratricopeptide repeat protein 11	28.54	28.3328	28.5919	29.0597	29.3156	29.0733	29.6087	29.5936	29.3307	+	+	+		6	3	5	4	3	4	5	4	5	6	45.4	45.4	16.937	6.5317e-139	390310000	338080000	404600000	3.77663e+08	559570000	668170000	564850000	597530000	818680000	810160000	675200000	7.68013e+08	0.632041	0.491741	0.77802	5	5	4	4	5	5
273	Breast carcinoma-associated antigen DF3;Carcinoma-associated mucin;Episialin;H23AG;MUC1-CT;Mucin-1;Mucin-1 subunit alpha;Mucin-1 subunit beta;Peanut-reactive urinary mucin;PEMT;Polymorphic epithelial mucin;Tumor-associated epithelial membrane antigen;Tumor-associated mucin;Mucin 1, cell surface associated;MUC1 isoform J13;MUC1 isoform T10	16.1214	16.1993	16.6176	28.1781	27.192	27.1142	29.0157	28.3449	27.4502	+	+	+		7	1	0	0	2	6	2	6	4	3	68.7	68.7	122.94	1.157e-72	0	0	0	0	303700000	153320000	145270000	2.00763e+08	542730000	340930000	183370000	3.55677e+08	4.98099e-09	2.81154e-09	0.564455	1	0	0	3	6	2
444	Abhydrolase domain-containing protein 14B;CCG1-interacting factor B;cDNA FLJ52710, highly similar to Abhydrolase domain-containing protein 14B;cDNA FLJ52723, highly similar to Abhydrolase domain-containing protein 14B	29.0166	29.0831	29.2811	30.0523	29.8481	29.9886	30.107	29.8154	30.3578	+	+	+		7	3	6	5	5	4	6	6	5	6	51.9	51.9	22.345	6.1732e-102	543070000	568720000	652360000	588050000	1113400000	966410000	1065300000	1048370000	1156400000	944770000	1376000000	1.15906e+09	0.560918	0.507352	0.904503	3	5	5	7	7	11
1851	Nuclear protein SkiP;Nuclear receptor coactivator NCoA-62;Ski-interacting protein;SNW domain-containing protein 1	29.306	29.1683	28.9855	27.5228	28.0523	28.0859	28.1758	28.0271	27.6795	+	+	+		7	4	4	3	3	2	4	2	2	3	17.3	17.3	65.391	1.2578e-70	663730000	603280000	531520000	599510000	192840000	278340000	284900000	2.52027e+08	303230000	273530000	214960000	2.63907e+08	2.37876	2.27167	0.954984	6	5	4	3	3	5
2030	Quiescin Q6;Sulfhydryl oxidase 1	17.7939	17.0069	16.5398	26.4832	25.3672	25.61	26.3936	25.7648	26.0411	+	+	+		7	1	1	0	2	3	5	2	3	3	13	13	82.577	3.9479e-28	0	0	0	0	93806000	43279000	51214000	6.27663e+07	88160000	57012000	69048000	7.14067e+07	1.59321e-08	1.40043e-08	0.878998	1	1	0	2	3	5
2099	Zinc finger protein 609	25.641	26.0613	24.9718	16.8127	18.1662	17.4692	18.2892	16.7476	15.7336	+	+	+		7	2	4	4	1	2	0	0	0	1	8.3	8.3	151.19	2.8497e-117	52326000	70021000	32905000	5.17507e+07	0	0	0	0	0	0	0	0	5.17507e+07	5.17507e+07	1	2	4	4	1	2	0
2270	Apoptosis repressor with CARD;Muscle-enriched cytoplasmic protein;Nucleolar protein 3;Nucleolar protein of 30 kDa	26.9199	27.9524	27.8634	30.7338	30.4427	30.2842	30.4529	30.174	30.6392	+	+	+		7	2	2	3	4	4	4	4	5	4	49.5	49.5	22.629	9.0218e-128	126970000	259730000	244190000	2.10297e+08	1785700000	1459400000	1307500000	1.51753e+09	1469700000	1211400000	1672300000	1.45113e+09	0.138578	0.144919	1.04576	2	2	4	9	5	5
2290	Cytochrome c-releasing factor 21;Gamma-glutamylcyclotransferase;Putative uncharacterized protein GGCT	28.3357	27.856	27.8135	28.8959	28.9226	28.8492	29.1802	29.0337	29.0784	+	+	+		7	3	5	5	6	4	7	7	7	6	47.3	47.3	21.007	2.2652e-162	338760000	242940000	235890000	272530000	499510000	508830000	483600000	4.97313e+08	608300000	549570000	566850000	5.74907e+08	0.548005	0.474042	0.865033	4	6	5	7	7	8
2321	Delta(3),delta(2)-enoyl-CoA isomerase;Diazepam-binding inhibitor-related protein 1;Dodecenoyl-CoA isomerase;DRS-1;Hepatocellular carcinoma-associated antigen 88;Peroxisomal 3,2-trans-enoyl-CoA isomerase;Renal carcinoma antigen NY-REN-1;Putative uncharacterized protein PECI	28.0119	28.2247	28.1236	28.6522	28.8411	28.6586	28.5912	28.6313	28.6309	+	+	+		7	3	6	5	6	6	5	6	5	6	24.1	24.1	43.585	3.0678e-171	270660000	313670000	292450000	292260000	421870000	480880000	423730000	442160000	404390000	415800000	415690000	411960000	0.660982	0.709438	1.07331	4	8	7	7	9	7
2803	Insulin-like growth factor-binding protein 5;Putative uncharacterized protein IGFBP5	16.8696	16.5288	16.982	27.9148	27.6795	27.0271	28.2793	27.3385	27.4737	+	+	+		7	0	1	0	4	5	2	5	6	7	27.9	27.9	30.57	4.0958e-42	0	0	0	0	253040000	214960000	136760000	2.01587e+08	325770000	169710000	186380000	2.27287e+08	4.96065e-09	4.39973e-09	0.886927	0	1	0	4	5	2
2859	D-dopachrome decarboxylase;D-dopachrome tautomerase;Phenylpyruvate tautomerase II;Putative uncharacterized protein DDT;Putative uncharacterized protein DDTL;D-dopachrome decarboxylase-like protein;D-dopachrome tautomerase-like protein;cDNA FLJ51263, moderately similar to D-dopachrome decarboxylase (EC 4.1.1.84);D-dopachrome tautomerase, isoform CRA_a	31.1053	31.4282	31.7254	32.5335	32.7193	32.5084	32.861	32.4693	32.9292	+	+	+		7	7	7	6	6	7	7	7	6	6	55.9	55.9	12.712	6.496e-210	2310000000	2889500000	3550600000	2916700000	6216600000	7071300000	6109400000	6.46577e+09	7801200000	5946300000	8178600000	7308700000	0.451099	0.399072	0.884667	13	15	12	16	17	17
3172	Cysteine-rich protein 2;Protein ESP1;cDNA FLJ56946, highly similar to Cysteine-rich protein 2	32.6578	32.62	32.7652	33.2532	33.6197	33.3255	33.4746	33.5425	33.9571	+	+	+		7	4	5	4	5	4	4	6	5	6	62.5	62.5	22.492	9.9399e-191	6775900000	6600800000	7299700000	6.89213e+09	10238000000	13199000000	10764000000	1.14003e+10	11936000000	12511000000	16677000000	13708000000	0.604555	0.502782	0.831655	10	10	11	11	12	13
3217	FTP-3;Heterogeneous nuclear ribonucleoprotein H;Heterogeneous nuclear ribonucleoprotein H2;cDNA FLJ57964, highly similar to Heterogeneous nuclear ribonucleoprotein H	31.2904	30.9257	31.3647	30.239	30.298	29.8777	30.1765	29.7617	30.1895	+	+	+		7	4	5	7	4	4	5	5	4	5	46.3	29.8	49.263	0	2626400000	2039700000	2765200000	2477100000	1267200000	1320100000	986500000	1.19127e+09	1213500000	910260000	1224500000	1.11609e+09	2.07938	2.21945	1.06736	8	6	12	6	6	7
3448	Dihydroorotate dehydrogenase, mitochondrial;Dihydroorotate oxidase;Putative uncharacterized protein DHODH	27.644	28.0148	27.4833	17.6209	17.1051	17.0231	16.5111	16.8467	16.197	+	+	+		7	4	5	2	1	1	1	0	0	0	27.8	27.8	42.867	1.6198e-72	209740000	271200000	187630000	2.22857e+08	0	0	0	0	0	0	0	0	2.22857e+08	2.22857e+08	1	4	8	3	1	1	1
3498	Alpha-2-macroglobulin receptor;Apolipoprotein E receptor;Low-density lipoprotein receptor-related protein 1 515 kDa subunit;Low-density lipoprotein receptor-related protein 1 85 kDa subunit;Low-density lipoprotein receptor-related protein 1 intracellular domain;Prolow-density lipoprotein receptor-related protein 1	17.0077	16.0682	18.9367	26.4539	26.1481	26.6702	26.3714	26.807	26.7591	+	+	+		7	0	0	1	5	5	5	4	4	5	2	2	504.6	1.9496e-73	0	0	0	0	91925000	74364000	106790000	9.10263e+07	86812000	117410000	113580000	105934000	1.09858e-08	9.43984e-09	0.859274	0	0	1	5	4	5
3567	Heterogeneous nuclear ribonucleoprotein A0	30.4424	30.8811	30.5658	28.8525	28.985	28.9748	29.0759	29.0819	28.9925	+	+	+		7	6	7	6	6	5	5	5	6	5	36.7	36.7	30.84	0	1459100000	1977600000	1589400000	1.67537e+09	484690000	531320000	527570000	5.14527e+08	565880000	568250000	534080000	556070000	3.25613	3.01287	0.925291	12	18	14	8	6	8
4691	Elongation factor G 2, mitochondrial;Elongation factor G2;Ribosome-releasing factor 2, mitochondrial	25.3419	26.1294	24.4004	16.2407	17.0428	17.0907	16.5508	15.9481	17.7793	+	+	+		7	4	3	4	0	1	1	2	1	1	13.1	13.1	86.6	1.0612e-39	42527000	73406000	22144000	4.60257e+07	0	0	0	0	0	0	0	0	4.60257e+07	4.60257e+07	1	5	5	6	0	1	2
4818	4-hydroxyphenylpyruvate dioxygenase-like protein;Glyoxalase domain-containing protein 1	27.8129	28.1609	27.6386	26.3841	26.0806	26.2095	26.8252	26.5067	26.5958	+	+	+		7	4	6	4	3	5	4	2	4	3	37.2	37.2	39.385	5.8131e-64	235790000	300110000	208960000	2.48287e+08	87580000	70966000	77597000	7.87143e+07	118900000	95346000	101420000	105222000	3.15428	2.35965	0.748079	4	8	6	3	5	4
5337	Ras-related protein Rab-18;RAB18, member RAS oncogene family	27.1477	27.0922	26.9817	27.7637	27.9757	27.9863	27.9612	28.235	28.0848	+	+	+		7	3	3	3	6	3	4	5	5	4	40.3	40.3	22.977	9.2065e-99	148690000	143070000	132530000	141430000	227880000	263960000	265900000	252580000	261320000	315920000	284680000	2.87307e+08	0.559941	0.492261	0.87913	3	3	3	6	3	4
5928	GTP-binding protein B;GTP-binding protein SAR1b;cDNA FLJ32259 fis, clone PROST1000298, highly similar to GTP-binding protein SAR1b;Putative uncharacterized protein DKFZp434B2017	26.7251	26.5065	26.4909	27.5209	27.388	27.4252	27.9783	27.7646	27.272	+	+	+		7	3	4	5	5	6	6	5	6	4	72.2	61.1	22.41	6.3461e-65	110930000	95337000	94309000	100192000	192580000	175640000	180220000	1.82813e+08	264420000	228030000	162060000	218170000	0.548056	0.459238	0.83794	3	4	5	5	8	6
5937	2-5-oligoadenylate synthase 3;p100 OAS	16.38	17.1193	17.1544	25.8481	26.1623	26.6226	25.8582	26.7096	26.3857	+	+	+		7	1	0	0	3	4	5	3	4	4	13.6	13.6	121.17	5.3253e-23	0	0	0	0	60400000	75101000	103320000	79607000	60826000	109750000	87679000	86085000	1.25617e-08	1.16164e-08	0.924749	1	0	0	3	5	5
1106	TCP1-chaperonin cofactor A;Tubulin-folding cofactor A;Tubulin-specific chaperone A;cDNA FLJ57496, moderately similar to Tubulin-specific chaperone A	30.8257	31.2881	31.3103	32.4286	32.3608	32.3322	32.618	32.7712	32.7615	+	+	+		8	5	6	4	5	7	6	7	7	6	57.1	57.1	14.306	8.2367e-246	1903100000	2622200000	2662800000	2.39603e+09	5780600000	5515500000	5407100000	5.56773e+09	6591500000	7330400000	7281100000	7.06767e+09	0.430343	0.339013	0.787775	9	9	7	11	15	14
1691	Mevalonate kinase;cDNA FLJ57872, highly similar to Mevalonate kinase (EC 2.7.1.36);Mevalonate kinase (Mevalonic aciduria), isoform CRA_a	27.6638	27.2962	27.55	28.4387	28.215	28.1985	28.4727	28.8397	28.3983	+	+	+		8	3	4	3	3	3	4	3	5	4	33.3	33.3	42.45	4.7824e-128	212640000	164810000	196510000	191320000	363840000	311570000	308020000	327810000	372510000	480430000	353790000	4.02243e+08	0.583631	0.475632	0.814954	3	4	3	3	3	4
2108	Doublecortin domain-containing protein 3A;Doublecortin-like and CAM kinase-like 1;Doublecortin-like kinase 1;Serine/threonine-protein kinase DCLK1;cDNA FLJ60535, highly similar to Serine/threonine-protein kinase DCAMKL1 (EC 2.7.11.1);Doublecortin and CaM kinase-like 1	17.6533	16.7137	17.0352	26.086	26.655	27.1866	25.1272	26.5322	24.9094	+	+	+		8	1	1	1	6	5	8	2	3	3	14.5	14.5	82.223	5.2114e-75	0	0	0	0	71229000	105670000	152750000	109883000	36647000	97051000	31513000	5.50703e+07	9.10059e-09	1.81586e-08	1.99532	1	1	1	6	5	9
2569	U1 small nuclear ribonucleoprotein 70 kDa	30.5541	30.8141	30.5174	29.5126	29.5501	29.7712	29.7425	29.1758	29.5283	+	+	+		8	6	7	5	4	5	5	5	5	3	19.2	19.2	51.556	9.1859e-38	1576500000	1887900000	1536900000	1667100000	765930000	786090000	916300000	8.22773e+08	898200000	606450000	774310000	7.59653e+08	2.0262	2.19455	1.08309	10	10	8	6	7	8
2850	Cellular retinoic acid-binding protein 1;Cellular retinoic acid-binding protein I	29.2461	28.9526	28.9369	30.8375	30.3974	30.4912	30.7888	30.9387	30.4407	+	+	+		8	4	4	7	6	7	7	8	8	8	62.8	57.7	15.565	6.0958e-169	636740000	519520000	513890000	5.56717e+08	1918700000	1414300000	1509300000	1614100000	1855000000	2058200000	1457300000	1.79017e+09	0.344908	0.310986	0.901648	9	7	10	11	11	15
2867	Cyclophilin F;Peptidyl-prolyl cis-trans isomerase F, mitochondrial;Rotamase F;Peptidyl-prolyl cis-trans isomerase	30.7073	30.8715	30.2452	29.3909	29.5152	29.0744	29.0979	29.3691	28.9319	+	+	+		8	5	7	5	4	3	4	3	4	4	60.4	57.5	22.04	4.9314e-112	1753100000	1964500000	1272700000	1.66343e+09	703930000	767300000	565300000	6.78843e+08	574560000	693400000	512110000	5.93357e+08	2.45039	2.80343	1.14407	14	17	13	9	9	8
2885	Ribonucleoside-diphosphate reductase subunit M2;Ribonucleotide reductase small chain;Ribonucleotide reductase small subunit;Putative uncharacterized protein RRM2	26.1718	26.0906	26.2108	26.9107	26.9708	27.2076	26.7589	27.0529	26.766	+	+	+		8	4	6	4	6	5	5	6	7	4	30.6	30.6	44.877	1.1456e-41	75596000	71457000	77665000	74906000	126160000	131530000	154990000	137560000	113560000	139230000	114120000	1.22303e+08	0.544533	0.612461	1.12474	5	7	5	8	6	9
2895	Caspase-14;Caspase-14 subunit p10;Caspase-14 subunit p19	18.9571	16.4031	16.6682	26.5586	26.0806	26.2305	27.0734	26.4528	26.5196	+	+	+		8	0	0	2	5	4	5	3	3	6	39.7	39.7	27.679	6.483e-164	0	0	0	0	98841000	70967000	78735000	8.28477e+07	141220000	91848000	96205000	1.09758e+08	1.20703e-08	9.11098e-09	0.754824	0	0	2	6	6	6
2955	Glycoprotein p43;Heterogeneous nuclear ribonucleoprotein G;Heterogeneous nuclear ribonucleoprotein G, N-terminally processed;RNA-binding motif protein, X chromosome;cDNA FLJ59107, moderately similar to Heterogeneous nuclear ribonucleoprotein G	30.7221	30.4267	30.3592	29.5199	29.7197	29.431	29.4483	29.2383	28.7628	+	+	+		8	7	7	5	5	6	5	6	6	4	21.7	21.7	42.331	2.3077e-222	1771200000	1443300000	1377300000	1530600000	769780000	884110000	723780000	7.92557e+08	732500000	633310000	455480000	6.07097e+08	1.93122	2.52118	1.30549	14	10	8	7	8	8
3412	Forkhead box protein K1;Myocyte nuclear factor	27.2349	27.5057	27.5949	26.8235	26.6505	26.5738	26.7577	26.8614	26.6622	+	+	+		8	4	5	5	5	5	6	3	6	6	15.6	15.6	75.456	4.4524e-67	157950000	190570000	202720000	1.83747e+08	118760000	105340000	99885000	107995000	113470000	121920000	106200000	1.13863e+08	1.70144	1.61375	0.948462	4	5	6	5	6	6
3642	Alpha-dystroglycan;Beta-dystroglycan;Dystroglycan;Dystrophin-associated glycoprotein 1	27.9988	28.0215	27.8744	28.5114	28.7028	28.4155	28.6947	28.4463	28.8613	+	+	+		8	2	4	3	6	4	5	4	6	8	14.7	14.7	97.44	6.1524e-81	268220000	272460000	246060000	2.62247e+08	382640000	436930000	358020000	392530000	434480000	365750000	487650000	4.29293e+08	0.668093	0.61088	0.914363	2	4	3	7	4	6
3689	Ribosome assembly protein BMS1 homolog;Ribosome biogenesis protein BMS1 homolog	27.2084	27.4247	26.6235	17.0697	17.1964	17.5969	16.4817	16.7211	16.6568	+	+	+		8	3	6	4	1	0	1	1	1	1	9.8	9.8	145.81	2.0521e-80	155080000	180160000	103390000	146210000	0	0	0	0	0	0	0	0	146210001	146210001	1	4	7	4	1	0	1
3920	Ubiquinone biosynthesis methyltransferase COQ5, mitochondrial;cDNA FLJ55122, highly similar to Ubiquinone biosynthesis methyltransferaseCOQ5, mitochondrial (EC 2.1.1.-)	27.9132	28.1992	27.8066	26.9829	26.8646	26.707	26.8201	26.7879	27.094	+	+	+		8	6	7	7	5	4	3	5	3	5	36.4	36.4	37.14	1.1021e-229	252760000	308180000	234750000	265230000	132640000	122190000	109550000	121460000	118480000	115870000	143250000	1.25867e+08	2.18368	2.10723	0.964989	7	7	8	5	4	3
4975	Lipin-3;Lipin-3-like;Phosphatidate phosphatase LPIN3	16.1616	16.9003	17.2468	25.5855	26.5062	26.5437	26.7115	26.5336	27.155	+	+	+		8	0	1	1	4	4	2	5	3	3	12.8	12.8	93.613	1.3187e-41	0	0	0	0	50350000	95318000	97823000	8.11637e+07	109890000	97140000	149440000	1.18823e+08	1.23208e-08	8.41586e-09	0.683062	0	1	1	4	4	2
5536	Butyrate-induced protein 1;Protein tyrosine phosphatase-like protein PTPLAD1;Protein-tyrosine phosphatase-like A domain-containing protein 1;cDNA FLJ54138, highly similar to Homo sapiens butyrate-induced transcript 1 (HSPC121), mRNA	29.1208	29.0031	28.9871	28.4363	28.1939	28.3342	28.3627	28.1903	28.4373	+	+	+		8	6	7	7	5	3	5	6	6	3	25.4	25.4	43.159	1.8907e-135	583760000	538020000	532110000	5.51297e+08	363220000	307060000	338400000	3.36227e+08	345170000	306280000	363480000	338310000	1.63966	1.62956	0.993842	6	8	10	6	4	5
174	Putative uncharacterized protein FAM98B;Protein FAM98B	28.8929	29.0554	29.0245	28.7124	28.6695	28.6717	28.2963	28.4878	28.3731	+	+	+		9	7	8	8	7	8	6	5	6	5	30.5	30.5	45.547	4.6057e-195	498460000	557890000	546060000	5.34137e+08	439850000	426950000	427620000	4.31473e+08	329630000	376440000	347660000	3.51243e+08	1.23794	1.5207	1.22842	10	12	14	10	11	11
381	RNA-binding protein Musashi homolog 2;cDNA FLJ56904, highly similar to RNA-binding protein Musashi homolog 2;cDNA FLJ52888, highly similar to RNA-binding protein Musashi homolog 2	30.1253	30.1396	30.2615	29.6461	29.8336	29.6905	29.2669	29.3137	29.2846	+	+	+		9	7	8	6	6	6	5	5	6	5	31.7	31.7	35.196	0	1171200000	1182800000	1287100000	1213700000	840170000	956790000	866400000	8.87787e+08	645980000	667280000	653950000	6.55737e+08	1.36711	1.8509	1.35388	10	12	9	10	9	8
867	Putative uncharacterized protein GRHL2;Brother of mammalian grainyhead;Grainyhead-like protein 2 homolog;Transcription factor CP2-like 3	28.8848	28.8556	28.5948	27.8046	28.0996	28.0285	27.8714	27.7486	27.8967	+	+	+		9	6	9	5	5	4	5	5	6	5	26.2	26.2	71.044	1.6636e-250	495670000	485730000	405400000	4.62267e+08	234440000	287620000	273800000	2.65287e+08	245540000	225510000	249890000	2.40313e+08	1.74252	1.9236	1.10392	8	13	7	6	5	7
1793	Cohesin subunit SA-2;SCC3 homolog 2;Stromal antigen 2	27.9131	28.0214	27.6122	26.5094	26.4751	26.5114	26.5514	26.1139	25.7772	+	+	+		9	7	5	7	4	5	5	3	4	3	9.7	9.7	141.32	2.7608e-79	252740000	272450000	205170000	2.43453e+08	95525000	93284000	95657000	94822000	98349000	72620000	57507000	7.61587e+07	2.56748	3.19666	1.24506	10	9	9	5	5	6
1844	CROC-1;TRAF6-regulated IKK activator 1 beta Uev1A;Ubiquitin-conjugating enzyme E2 variant 1	29.7464	29.6003	29.8971	30.9642	31.002	30.6465	31.1571	30.571	30.8533	+	+	+		9	6	7	7	6	7	7	8	8	7	24.6	24.6	42.208	2.6572e-181	900650000	813940000	999830000	9.04807e+08	2094900000	2150500000	1680800000	1975400000	2394600000	1595100000	1939900000	1.97653e+09	0.458037	0.457775	0.999427	11	9	13	12	14	15
2429	Associated molecule with the SH3 domain of STAM;Endosome-associated ubiquitin isopeptidase;STAM-binding protein;Putative uncharacterized protein STAMBP	27.589	27.8262	27.949	28.5767	28.9603	28.934	28.6758	28.6209	28.7932	+	+	+		9	2	6	3	5	6	5	5	6	4	33	33	48.076	1.9444e-119	201890000	237970000	259110000	232990000	400340000	522300000	512870000	4.78503e+08	428810000	412800000	465170000	4.35593e+08	0.486914	0.53488	1.09851	3	7	4	6	8	8
2448	DDAHII;Dimethylargininase-2;N(G),N(G)-dimethylarginine dimethylaminohydrolase 2;Protein G6a;S-phase protein;Dimethylarginine dimethylaminohydrolase 2	29.807	29.8141	29.7263	30.2888	30.1794	30.0635	30.414	30.3445	30.43	+	+	+		9	4	5	6	6	5	8	6	8	8	65.3	65.3	29.644	2.4973e-218	939260000	943940000	888190000	9.23797e+08	1311700000	1215900000	1122100000	1.21657e+09	1430600000	1363300000	1446600000	1413500000	0.759347	0.653553	0.860677	5	6	7	7	7	8
2720	35 kDa lectin;Carbohydrate-binding protein 35;Galactose-specific lectin 3;Galactoside-binding protein;Galectin-3;IgE-binding protein;L-31;Laminin-binding protein;Lectin L-29;Mac-2 antigen	34.3483	34.5921	34.4207	35.23	35.2869	34.9909	36.0328	35.5559	36.0427	+	+	+		9	6	8	8	8	7	7	8	9	9	31.2	31.2	26.152	2.079e-183	21871000000	25897000000	22996000000	23588000000	40297000000	41919000000	34144000000	3.87867e+10	70301000000	50512000000	70783000000	6.38653e+10	0.608147	0.36934	0.60732	30	34	39	40	40	38
2725	Insulin-like growth factor-binding protein 2;Putative uncharacterized protein IGFBP2	16.2894	18.0462	15.6889	28.6994	28.7925	28.1227	28.3278	28.5462	28.0181	+	+	+		9	1	1	1	7	5	4	6	5	8	40.6	40.6	34.814	1.0796e-151	0	0	0	0	435900000	464960000	292270000	397710000	336900000	391990000	271820000	333570000	2.51439e-09	2.99787e-09	1.19228	1	1	2	7	6	4
3220	GDNF family receptor alpha-1;RET ligand 1;TGF-beta-related neurotrophic factor receptor 1;cDNA FLJ51412, highly similar to GDNF family receptor alpha-1	30.3305	30.1931	30.685	27.9536	27.8981	28.156	28.013	26.6313	26.962	+	+	+		9	7	7	6	3	4	5	2	4	3	25.4	25.4	50.838	6.9749e-111	1350200000	1227500000	1726200000	1.43463e+09	259940000	250130000	299090000	269720000	270860000	103950000	130730000	1.68513e+08	5.31897	8.51347	1.60059	10	10	12	3	4	6
3499	Alternative-splicing factor 1;pre-mRNA-splicing factor SF2, P33 subunit;Splicing factor, arginine/serine-rich 1	30.1045	29.9352	30.0646	28.1749	28.4142	28.6083	27.8187	28.2755	28.4506	+	+	+		9	7	8	8	4	5	5	4	4	3	35.5	35.5	27.744	1.1374e-68	1154400000	1026600000	1122900000	1101300000	303040000	357710000	409220000	3.56657e+08	236740000	324930000	366860000	309510000	3.08784	3.5582	1.15233	20	17	17	9	7	6
3827		29.0839	29.6155	29.1284	30.3054	30.3622	30.1034	30.2247	30.2776	30.4504	+	+	+		9	5	7	5	7	7	8	6	8	7	48.8	48.8	28.86	1.5079e-149	569020000	822540000	586830000	6.59463e+08	1326900000	1380200000	1153500000	1.28687e+09	1254700000	1301600000	1467200000	1.34117e+09	0.512457	0.491709	0.959513	8	13	8	11	10	13
3888	Gene regulated in breast cancer 1 protein;Protein GREB1	26.1881	26.7548	27.7525	15.8646	18.0219	17.2429	17.0478	16.5621	17.1565	+	+	+		9	6	7	8	0	0	0	0	0	0	7.9	7.9	216.46	2.2874e-67	76452000	113240000	226120000	138604000	0	0	0	0	0	0	0	0	138604001	138604001	1	6	8	10	0	0	0
3977	CFTR-associated protein of 70 kDa;Na(+)/H(+) exchange regulatory cofactor NHE-RF3;Na(+)/H(+) exchanger regulatory factor 3;Na/Pi cotransporter C-terminal-associated protein 1;PDZ domain-containing protein 1;Sodium-hydrogen exchanger regulatory factor 3;Putative PDZ domain-containing protein 1P	26.5941	26.4821	29.0875	16.2773	16.9185	16.8129	17.0163	17.8397	16.9671	+	+	+		9	2	4	9	0	0	0	0	0	0	30.3	30.3	57.129	7.2998e-83	101300000	93735000	570430000	255155000	0	0	0	0	0	0	0	0	255155001	255155001	1	2	4	11	0	0	0
4472	1-acylglycerophosphocholine O-acyltransferase;1-alkylglycerophosphocholine O-acetyltransferase;Acetyl-CoA:lyso-platelet-activating factor acetyltransferase;Acyltransferase-like 2;Lysophosphatidylcholine acyltransferase 1;Phosphonoformate immuno-associated protein 3	30.017	30.2516	29.9651	28.8343	28.6656	28.6083	28.5167	28.6631	28.2464	+	+	+		9	7	8	7	5	4	4	6	5	5	23.4	23.4	59.151	5.2417e-74	1086500000	1278300000	1048100000	1.13763e+09	478610000	425790000	409220000	4.37873e+08	384040000	425070000	318420000	3.75843e+08	2.59809	3.02688	1.16504	11	12	12	8	7	5
4517	Phosphatidylinositol-5-phosphate 4-kinase type II gamma;Phosphatidylinositol-5-phosphate 4-kinase type-2 gamma;cDNA FLJ52923, highly similar to Homo sapiens phosphatidylinositol-4-phosphate 5-kinase, type II, gamma (PIP5K2C), mRNA;cDNA FLJ60683, highly similar to Homo sapiens phosphatidylinositol-4-phosphate 5-kinase, type II, gamma (PIP5K2C), mRNA	27.083	27.3076	27.315	28.4046	28.1313	27.9959	28.328	28.3528	28.2312	+	+	+		9	2	4	3	5	5	5	4	4	3	26.4	26.4	47.299	4.1546e-131	142170000	166110000	166970000	1.58417e+08	355340000	294020000	267670000	3.05677e+08	336960000	342800000	315090000	3.31617e+08	0.518249	0.47771	0.921777	3	5	3	7	7	6
4680	Calcium pump 3;Sarcoplasmic/endoplasmic reticulum calcium ATPase 3	27.1008	27.2577	27.5751	28.8658	29.065	29.2635	28.9742	29.3396	29.3992	+	+	+		9	4	4	4	5	6	7	6	6	6	17.1	11.7	112.78	0	143930000	160470000	199950000	1.68117e+08	489200000	561620000	644470000	5.65097e+08	527350000	679380000	708020000	638250000	0.297501	0.263403	0.885385	4	5	6	9	10	13
4762	DAZ-associated protein 1;Deleted in azoospermia-associated protein 1	29.1192	29.0447	28.543	27.7694	27.9143	27.5884	27.8673	27.5246	27.8681	+	+	+		9	6	9	7	3	5	5	4	5	4	34.2	34.2	43.383	2.3692e-244	583110000	553750000	391100000	509320000	228790000	252950000	201810000	227850000	244840000	193080000	244980000	2.27633e+08	2.23533	2.23746	1.00095	9	10	9	3	6	5
5199	Vacuolar protein sorting-associated protein 16 homolog;Vacuolar protein sorting 16 homolog (S. cerevisiae)	26.1349	26.6843	26.8122	16.2601	18.246	16.6988	18.142	17.5417	17.7022	+	+	+		9	2	5	3	2	1	3	2	2	1	16.8	16.8	94.693	2.1905e-65	73688000	107840000	117840000	9.97893e+07	0	0	0	0	0	0	0	0	9.97893e+07	9.97893e+07	1	3	5	4	3	2	4
5396	Heme-binding protein 1;p22HBP	29.3237	28.93	28.9478	30.4237	30.449	30.463	30.306	30.3354	30.5174	+	+	+		9	6	9	6	7	9	8	7	8	9	65.1	65.1	21.097	0	671920000	511450000	517780000	567050000	1440300000	1465800000	1480100000	1.46207e+09	1327400000	1354800000	1536900000	1.40637e+09	0.387841	0.403202	1.03961	10	11	8	11	15	13
5901	GDP-mannose pyrophosphorylase B;GTP-mannose-1-phosphate guanylyltransferase beta;Mannose-1-phosphate guanyltransferase beta	27.4147	27.3266	27.3029	28.3445	28.2736	28.4414	28.134	28.1737	27.9298	+	+	+		9	4	3	4	7	6	6	5	6	6	30.5	30.5	42.621	1.0824e-153	178920000	168310000	165580000	1.70937e+08	340840000	324480000	364510000	3.43277e+08	294570000	302780000	255680000	2.84343e+08	0.497956	0.601163	1.20726	4	3	5	9	6	8
50	Phosphoglycolate phosphatase	29.8018	29.8998	30.0371	30.8475	30.8997	30.7525	31.2154	30.712	31.0526	+	+	+		10	3	4	3	4	5	5	5	7	7	57.9	57.9	34.006	9.9715e-289	935920000	1001700000	1101700000	1.01311e+09	1932100000	2003300000	1809000000	1914800000	2493200000	1758900000	2227200000	2.15977e+09	0.529093	0.469082	0.886577	4	5	4	6	7	7
282	Heterogeneous nuclear ribonucleoproteins C1/C2;cDNA, FLJ92712, highly similar to Homo sapiens heterogeneous nuclear ribonucleoprotein C (C1/C2) (HNRPC), transcript variant 1, mRNA;cDNA FLJ53542, highly similar to Heterogeneous nuclear ribonucleoproteins C;Heterogeneous nuclear ribonucleoprotein C-like 1;hnRNP core protein C-like 1	30.3641	30.7341	30.5185	28.9922	29.4241	29.534	28.1377	28.3628	28.7149	+	+	+		10	7	7	7	5	6	5	6	5	3	29.4	29.4	33.67	3.3537e-179	1382000000	1786000000	1538100000	1568700000	533970000	720330000	777340000	6.77213e+08	295320000	345190000	440610000	3.60373e+08	2.3164	4.35299	1.8792	23	22	18	6	10	9
487	5-methyltetrahydrofolate--homocysteine methyltransferase;Methionine synthase;Vitamin-B12 dependent methionine synthase;MTR protein;cDNA FLJ56487, highly similar to Methionine synthase (EC 2.1.1.13);5-methyltetrahydrofolate-homocysteine methyltransferase	16.9537	16.3724	16.2664	25.6318	25.4445	26.0165	25.7812	25.6966	26.0359	+	+	+		10	0	0	1	7	2	6	5	5	3	11.1	11.1	140.53	1.0875e-37	0	0	0	0	51991000	45664000	67879000	55178000	57667000	54381000	68802000	6.02833e+07	1.81232e-08	1.65883e-08	0.915311	0	0	1	6	2	6
507	Putative uncharacterized protein BPNT1;3(2),5-bisphosphate nucleotidase 1;Bisphosphate 3-nucleotidase 1;PAP-inositol-1,4-phosphatase;cDNA FLJ52417, highly similar to 3(2),5-bisphosphate nucleotidase 1 (EC 3.1.3.7);cDNA FLJ52203, highly similar to 3(2),5-bisphosphate nucleotidase 1 (EC 3.1.3.7)	29.5984	29.6947	29.3645	30.0923	30.2159	30.0992	30.3889	30.3441	30.019	+	+	+		10	3	5	4	7	8	9	5	5	7	37.2	37.2	35.744	3.412e-99	812850000	868980000	691200000	791010000	1144700000	1247100000	1150200000	1.18067e+09	1405900000	1363000000	1088000000	1.28563e+09	0.669969	0.615269	0.918354	5	7	4	7	9	9
2199	Mitochondrial import inner membrane translocase subunit TIM44	29.3647	29.7273	29.2766	28.3752	28.4182	28.4099	28.3224	28.4657	27.7262	+	+	+		10	7	9	5	6	9	4	6	6	5	20.4	20.4	51.355	1.0364e-131	691270000	888790000	650310000	7.43457e+08	348160000	358700000	356650000	3.54503e+08	335660000	370700000	222040000	3.09467e+08	2.09718	2.40238	1.14553	10	15	7	7	12	5
2517	Interferon-induced 15 kDa protein;Interferon-induced 17 kDa protein;Ubiquitin cross-reactive protein	28.9107	28.4415	29.346	31.554	30.5793	31.161	30.8493	30.414	31.2363	+	+	+		10	5	5	6	8	7	6	6	6	6	53.9	53.9	17.887	8.5813e-190	504630000	364540000	682380000	5.17183e+08	3152800000	1604300000	2401000000	2.38603e+09	1934500000	1430600000	2529600000	1964900000	0.216754	0.263211	1.21433	6	5	8	18	12	13
2757	Cysteine and glycine-rich protein 1;Cysteine-rich protein 1;cDNA FLJ16406 fis, clone UTERU2026142, highly similar to Cysteine and glycine-rich protein 1	30.3436	30.2399	30.6622	32.4545	32.3458	31.8677	32.5636	32.3491	32.5072	+	+	+		10	6	5	5	6	7	8	8	8	8	67.9	67.9	20.567	1.3413e-286	1362500000	1268000000	1699200000	1.44323e+09	5885400000	5458300000	3918600000	5.08743e+09	6347900000	5470700000	6104500000	5.97437e+09	0.283686	0.241571	0.851544	9	11	11	16	19	17
2868	Glycylpeptide N-tetradecanoyltransferase 1;Myristoyl-CoA:protein N-myristoyltransferase 1;Peptide N-myristoyltransferase 1	27.2022	27.0597	27.2828	27.9056	28.0836	28.0047	27.6376	27.6661	27.7719	+	+	+		10	5	4	4	5	4	6	5	7	7	28.8	28.8	56.806	2.7338e-163	154410000	139890000	163280000	1.52527e+08	251440000	284450000	269310000	268400000	208800000	212970000	229180000	2.16983e+08	0.568281	0.702942	1.23696	5	4	5	7	6	9
2871	Alpha-2-macroglobulin receptor-associated protein;Low density lipoprotein receptor-related protein-associated protein 1	28.8004	28.694	29.0893	30.111	30.3587	29.8959	29.9835	29.9839	30.3595	+	+	+		10	5	9	8	10	10	10	10	10	9	31.4	31.4	41.465	1.0365e-104	467500000	434250000	571160000	490970000	1159600000	1376800000	998980000	1178460000	1061500000	1061800000	1377600000	1.16697e+09	0.41662	0.420723	1.00985	7	12	13	15	14	17
2874	Glutathione S-transferase theta-1;Glutathione transferase T1-1;GST class-theta-1	28.0314	28.2888	28.4217	29.1888	29.3628	28.9991	29.0872	29.1987	29.3877	+	+	+		10	2	4	6	6	7	6	7	7	8	55	55	27.335	5.2003e-65	274340000	327930000	359560000	320610000	611920000	690360000	536540000	612940000	570320000	616150000	702400000	6.29623e+08	0.523069	0.509209	0.973503	3	6	7	7	10	7
2933	Protein DEK;cDNA FLJ53031, highly similar to Protein DEK;cDNA FLJ52337, highly similar to Protein DEK	30.0136	29.826	29.8342	29.2181	29.368	29.1648	29.2659	28.9219	29.089	+	+	+		10	8	7	8	5	7	6	5	7	6	22.1	22.1	42.674	5.1715e-199	1083900000	951770000	957190000	997620000	624490000	692850000	601840000	6.39727e+08	645520000	508590000	571050000	5.75053e+08	1.55945	1.73483	1.11246	10	9	10	6	8	6
3051	Iron regulatory protein 2;Iron-responsive element-binding protein 2	16.1032	15.6009	15.4858	26.2625	26.1308	26.2306	26.6465	27.5472	27.0539	+	+	+		10	0	0	0	5	5	5	7	8	7	19.3	19.3	105.04	1.9546e-74	0	0	0	0	80501000	73477000	78738000	77572000	105050000	196120000	139330000	1.46833e+08	1.28912e-08	6.81044e-09	0.5283	0	0	0	5	5	5
3329	Histone H4	33.2548	33.5878	33.0207	30.9321	31.3503	31.6516	32.3183	32.2381	32.1979	+	+	+		10	9	10	9	6	6	8	9	10	7	60.2	60.2	11.367	5.6619e-249	10249000000	12910000000	8714200000	10624400000	2048700000	2737600000	3373400000	2719900000	5355200000	5065800000	4926400000	5115800000	3.90617	2.07678	0.531667	39	44	39	18	23	24
3634	Bystin	28.7345	28.4643	28.6247	27.6301	27.524	27.6853	27.4626	27.6292	27.7157	+	+	+		10	5	8	6	5	5	4	5	4	4	32.3	32.3	49.601	1.5876e-60	446640000	370350000	413900000	4.10297e+08	207730000	193000000	215830000	205520000	184960000	207600000	220420000	2.04327e+08	1.99638	2.00804	1.00584	7	9	7	7	5	5
4912	Calponin H2, smooth muscle;Calponin-2;Neutral calponin;Calponin 2, isoform CRA_a;cDNA FLJ44427 fis, clone UTERU2007724, highly similar to Homo sapiens calponin 2 (CNN2), transcript variant 2, mRNA;Putative uncharacterized protein CNN2	30.0267	30.3775	30.2297	29.2366	29.3618	28.9193	29.0875	29.1301	28.9151	+	+	+		10	8	10	7	7	6	7	6	5	5	48.2	48.2	33.697	3.7507e-254	1093800000	1394900000	1259100000	1.24927e+09	632540000	689890000	507670000	6.10033e+08	570450000	587530000	506190000	5.54723e+08	2.04787	2.25205	1.09971	12	17	13	9	9	8
5287	39S ribosomal protein L44, mitochondrial	29.9457	30.2425	30.2565	29.1531	29.342	29.1784	29.4414	28.7448	28.9518	+	+	+		10	8	9	6	7	6	6	6	5	5	30.4	30.4	37.535	4.403e-245	1034100000	1270300000	1282700000	1195700000	596970000	680500000	607550000	628340000	729010000	449820000	519230000	566020000	1.90295	2.11247	1.1101	8	13	9	8	8	8
5662	GlcNAc kinase;N-acetyl-D-glucosamine kinase;Putative uncharacterized protein NAGK	28.6476	28.6635	28.9154	29.696	29.7088	29.9025	29.8103	29.7717	29.9232	+	+	+		10	7	7	9	8	9	10	8	7	9	45.1	45.1	37.375	2.0809e-121	420520000	425170000	506280000	4.50657e+08	869730000	877460000	1003600000	916930000	941450000	916560000	1018100000	9.58703e+08	0.491484	0.470069	0.956427	8	7	9	9	10	11
173	Putative uncharacterized protein DKC1;CBF5 homolog;Dyskerin;H/ACA ribonucleoprotein complex subunit 4;Nopp140-associated protein of 57 kDa;Nucleolar protein family A member 4;Nucleolar protein NAP57;snoRNP protein DKC1	29.3379	29.1428	29.5945	28.0722	27.8952	27.2948	27.6281	27.8338	27.7619	+	+	+		11	6	9	8	2	2	2	4	4	6	33.7	33.7	57.644	3.2642e-73	678550000	592740000	810630000	6.93973e+08	282210000	249630000	164650000	2.32163e+08	207430000	239230000	227590000	224750000	2.98916	3.08776	1.03298	9	12	10	3	2	2
830	Insulin-like growth factor 1 receptor;Insulin-like growth factor 1 receptor alpha chain;Insulin-like growth factor 1 receptor beta chain;Insulin-like growth factor I receptor;Tyrosine-protein kinase receptor	25.8068	25.6385	24.6732	16.7601	16.2547	17.1524	16.6227	17.2535	16.2845	+	+	+		11	3	8	6	0	0	0	0	0	0	9.9	9.9	154.79	4.9645e-35	58697000	52233000	26753000	4.58943e+07	0	0	0	0	0	0	0	0	4.58943e+07	4.58943e+07	1	4	10	7	0	0	0
924	Putative uncharacterized protein UFD1L;Ubiquitin fusion degradation protein 1 homolog	28.4548	28.561	28.5116	29.2969	29.1967	29.1659	29.1526	29.2449	29.1346	+	+	+		11	7	8	7	8	8	8	7	7	8	38.5	38.5	38.53	3.5932e-110	367910000	396020000	382680000	3.82203e+08	659570000	615300000	602320000	625730000	596760000	636210000	589380000	607450000	0.610812	0.629193	1.03009	8	8	8	10	10	9
1900	28S ribosomal protein S22, mitochondrial;Brain my045 protein	29.9289	29.9719	29.8104	28.9424	29.394	29.05	28.9378	28.7865	29.0839	+	+	+		11	10	7	7	7	7	5	6	7	5	33.3	33.3	41.28	6.924e-168	1022100000	1053000000	941530000	1.00554e+09	515860000	705480000	555820000	5.92387e+08	514230000	463020000	569030000	5.15427e+08	1.69744	1.9509	1.14931	12	10	10	8	10	8
1914	Heterogeneous nuclear ribonucleoprotein H;Heterogeneous nuclear ribonucleoprotein H, N-terminally processed	33.6157	33.3988	33.4645	32.3934	32.5548	32.2318	32.556	32.0239	32.0003	+	+	+		11	10	8	9	7	7	8	7	8	9	44.3	38.6	51.229	0	13162000000	11325000000	11853000000	1.21133e+10	5641200000	6309000000	5043600000	5664600000	6314500000	4366700000	4296000000	4992400000	2.13843	2.42635	1.13464	63	78	72	32	29	22
2028	Chloride channel ABP;Chloride intracellular channel protein 1;Nuclear chloride ion channel 27;Regulatory nuclear chloride ion channel protein	31.3259	31.3173	31.3794	32.0417	31.8084	31.8049	31.897	31.7244	32.1245	+	+	+		11	8	8	9	10	10	7	7	10	7	61	58.5	26.922	2.3337e-266	2691700000	2675700000	2793400000	2.72027e+09	4420900000	3760900000	3751800000	3.97787e+09	3999000000	3548000000	4682000000	4.07633e+09	0.683851	0.667332	0.975844	22	23	21	28	22	18
2153	Procollagen-proline,2-oxoglutarate-4-dioxygenase subunit alpha-2;Prolyl 4-hydroxylase subunit alpha-2	26.097	27.2595	26.3588	28.9787	28.9678	29.21	29.1946	29.4441	29.5693	+	+	+		11	3	4	3	7	10	6	8	8	8	30.3	30.3	60.901	1.0783e-262	71778000	160670000	86056000	106168000	529010000	525010000	620980000	5.58333e+08	614390000	730410000	796590000	7.13797e+08	0.190152	0.148737	0.782202	3	5	3	11	13	10
2345	eIF3 p42;eIF3 p44;eIF-3-delta;Eukaryotic translation initiation factor 3 RNA-binding subunit;Eukaryotic translation initiation factor 3 subunit 4;Eukaryotic translation initiation factor 3 subunit G	29.4172	29.3904	29.3235	29.9546	29.7528	29.8318	29.8059	29.7212	29.9446	+	+	+		11	7	8	8	6	8	8	7	8	6	35.9	35.9	35.611	3.638e-262	716880000	703710000	671820000	697470000	1040500000	904660000	955580000	9.66913e+08	938560000	885030000	1033300000	9.52297e+08	0.721337	0.732408	1.01535	8	11	11	9	10	10
2577	2-phospho-D-glycerate hydro-lyase;Enolase 2;Gamma-enolase;Neural enolase;Neuron-specific enolase;Enolase	28.5561	28.6052	29.2242	32.2744	31.8426	32.2233	32.3875	32.356	32.8171	+	+	+		11	5	6	8	9	9	9	9	10	10	48.4	40.8	47.268	0	394690000	408340000	627130000	476720000	5194600000	3851100000	5014100000	4686600000	5618200000	5496900000	7566900000	6.22733e+09	0.10172	0.0765528	0.752585	8	6	11	16	18	23
3091	Arg/Glu/Asp-rich protein of 120 kDa;Protein S164;RNA-binding motif protein 25;RNA-binding protein 25;RNA-binding region-containing protein 7	28.9523	29.275	29.0058	28.2367	28.3081	28.4188	28.2794	28.202	28.5754	+	+	+		11	9	10	10	6	10	8	7	9	7	21.2	21.2	100.18	2.3914e-93	519410000	649600000	539030000	5.69347e+08	316290000	332350000	358850000	335830000	325790000	308790000	400000000	344860000	1.69534	1.65095	0.973815	15	13	15	8	10	9
3181	Diphosphomevalonate decarboxylase;Mevalonate (diphospho)decarboxylase;Mevalonate pyrophosphate decarboxylase	27.3241	27.5177	27.5329	28.6952	28.3489	28.8863	29.204	29.0297	28.9282	+	+	+		11	6	5	3	7	6	8	8	7	7	46.5	46.5	43.404	1.6988e-120	168020000	192150000	194190000	1.84787e+08	434630000	341880000	496190000	4.24233e+08	618410000	548040000	510790000	559080000	0.435578	0.330519	0.758806	7	7	3	13	10	15
3344	Adapter protein GRB2;Growth factor receptor-bound protein 2;Protein Ash;SH2/SH3 adapter GRB2	29.4956	29.6201	29.529	30.8661	30.9329	30.8113	31.0831	30.8793	30.8045	+	+	+		11	9	8	9	9	10	9	9	10	10	46.1	46.1	25.206	6.5376e-150	756930000	825150000	774680000	7.85587e+08	1957100000	2049900000	1884200000	1.96373e+09	2274800000	1975200000	1875300000	2.04177e+09	0.400048	0.384758	0.961781	12	15	14	16	16	16
3779	ELAV-like protein 1;Hu-antigen R	31.681	31.7333	31.838	30.2806	30.5677	30.4113	30.742	30.3588	30.5455	+	+	+		11	10	11	11	10	11	10	9	9	9	43.9	43.9	36.091	4.4371e-243	3443000000	3570100000	3838700000	3.61727e+09	1304300000	1591400000	1428000000	1.44123e+09	1795800000	1376900000	1567200000	1.57997e+09	2.50984	2.28946	0.912192	20	23	25	17	15	13
4277	Functional spliceosome-associated protein 35;THO complex subunit 6 homolog;WD repeat-containing protein 58	28.5506	28.4284	28.536	27.1781	27.7825	27.3553	27.1204	27.203	26.9537	+	+	+		11	6	8	7	4	3	4	3	4	3	48.7	48.7	37.535	8.1009e-110	393170000	361250000	389230000	3.81217e+08	151850000	230870000	171700000	1.84807e+08	145900000	154500000	129980000	143460000	2.06279	2.6573	1.28821	8	10	10	5	5	5
4642	28S ribosomal protein S31, mitochondrial;Imogen 38	28.7669	28.7246	28.639	27.6883	27.8862	27.3955	27.5495	27.3203	27.1076	+	+	+		11	7	9	7	6	4	4	4	5	4	39.2	39.2	45.318	4.839e-151	456760000	443570000	418010000	4.39447e+08	216270000	248080000	176550000	2.13633e+08	196440000	167580000	144610000	1.69543e+08	2.05701	2.59194	1.26005	8	11	7	6	6	3
5120	Angiotensin-binding protein;Microsomal endopeptidase;Mitochondrial oligopeptidase M;Neurolysin, mitochondrial;Neurotensin endopeptidase	28.3251	28.6774	28.4441	27.2823	27.2523	27.6847	27.2275	26.3997	27.2289	+	+	+		11	9	7	9	8	4	6	3	2	4	20.3	20.3	80.651	1.3966e-45	336280000	429290000	365200000	3.76923e+08	163230000	159870000	215740000	1.79613e+08	157140000	88530000	157290000	134320000	2.09853	2.80616	1.3372	9	10	10	8	4	6
5451	ATP-dependent RNA helicase DDX18;DEAD box protein 18;Myc-regulated DEAD box protein	28.6811	29.0065	28.981	27.3246	26.931	27.7172	27.2749	26.9569	27.7186	+	+	+		11	6	8	7	4	3	5	6	4	4	23.7	23.7	75.406	3.9882e-39	430400000	539300000	529840000	4.99847e+08	168080000	127950000	220660000	172230000	162390000	130270000	220870000	1.71177e+08	2.9022	2.92006	1.00615	10	10	11	6	4	6
476	cDNA FLJ59393, highly similar to Procollagen-lysine,2-oxoglutarate5-dioxygenase 1 (EC 1.14.11.4);cDNA, FLJ79184, highly similar to Procollagen-lysine, 2-oxoglutarate 5-dioxygenase 1 (EC 1.14.11.4);Lysyl hydroxylase 1;Procollagen-lysine,2-oxoglutarate 5-dioxygenase 1	25.2594	25.9057	25.3645	26.8003	26.9694	27.3086	27.0131	27.1692	27.335	+	+	+		12	2	3	2	6	8	7	8	6	8	20.5	20.5	88.271	1.8494e-131	40164000	62863000	43199000	48742000	116870000	131400000	166230000	1.38167e+08	135440000	150920000	169300000	1.51887e+08	0.352777	0.32091	0.909669	3	4	3	7	7	8
628	Heterogeneous nuclear ribonucleoprotein L-like;Stromal RNA-regulating factor;Heterogeneous nuclear ribonucleoprotein L-like, isoform CRA_a;Putative uncharacterized protein HNRPLL;Stromal RNA regulating factor	29.3876	29.3903	29.3443	28.5327	28.6635	28.8414	28.4161	28.4452	28.4642	+	+	+		12	10	5	8	7	5	10	7	7	6	36.9	36.9	60.082	2.3911e-199	702350000	703650000	681600000	6.95867e+08	388330000	425190000	480990000	4.31503e+08	358180000	365480000	370310000	3.64657e+08	1.61266	1.90828	1.18331	12	6	11	7	5	10
1901	Cleavage and polyadenylation specificity factor 73 kDa subunit;Cleavage and polyadenylation specificity factor subunit 3;mRNA 3-end-processing endonuclease CPSF-73	28.3944	28.141	28.1402	27.5174	27.5745	27.4046	27.6057	27.7643	27.7395	+	+	+		12	7	8	7	6	5	7	6	6	3	28.7	28.7	77.485	3.4295e-144	352830000	296000000	295840000	314890000	192120000	199870000	177670000	1.89887e+08	204240000	227970000	224090000	2.18767e+08	1.6583	1.43939	0.867987	9	10	8	7	6	7
1946	AU-rich element RNA-binding protein 1;Heterogeneous nuclear ribonucleoprotein D0;cDNA FLJ54150, highly similar to Heterogeneous nuclear ribonucleoprotein D0	32.4505	32.1643	32.3722	31.2009	31.4567	31.2187	31.4747	31.3577	31.3033	+	+	+		12	10	10	9	8	9	8	8	10	5	26.8	23.9	38.434	5.7076e-170	5869300000	4813000000	5559000000	5.41377e+09	2468400000	2947200000	2499000000	2638200000	2984300000	2751800000	2650000000	2.79537e+09	2.05207	1.93669	0.943776	27	23	25	16	18	16
2424	Protein transport protein Sec24A;SEC24-related protein A	25.9902	26.3163	25.9315	26.6642	26.7551	26.7549	27.1074	27.1535	26.9559	+	+	+		12	6	6	6	4	5	7	6	5	8	15.2	15.2	119.75	2.0011e-262	66653000	83559000	63998000	7.14033e+07	106350000	113260000	113250000	1.10953e+08	144590000	149290000	130180000	1.41353e+08	0.643544	0.505141	0.784936	6	8	6	4	7	9
2446	Echinoderm microtubule-associated protein-like 2;Putative uncharacterized protein C17orf87	29.3628	29.3313	29.247	30.6323	30.1148	30.371	30.407	30.0465	30.6202	+	+	+		12	6	5	5	11	8	6	9	10	6	24.7	24.7	86.47	7.7442e-255	690370000	675440000	637140000	667650000	1664400000	1162700000	1388600000	1.40523e+09	1423700000	1108900000	1650400000	1.39433e+09	0.475117	0.478831	1.00782	7	8	7	19	11	11
3823	Rhodanese;Thiosulfate sulfurtransferase	31.2021	31.079	31.2411	29.3437	29.9531	29.6031	29.0504	28.745	29.3914	+	+	+		12	12	11	10	8	6	7	5	5	6	54.2	54.2	33.429	2.1929e-194	2470400000	2268300000	2538100000	2425600000	681280000	1039400000	815520000	845400000	555960000	449890000	704200000	5.70017e+08	2.86917	4.25531	1.48311	20	18	17	8	8	9
4348	Protein ftsJ homolog 3;Putative rRNA methyltransferase 3;rRNA (uridine-2-O-)-methyltransferase 3	27.9404	28.3715	28.1769	27.0196	27.307	27.4256	26.9079	27.3119	26.8803	+	+	+		12	8	10	8	5	8	6	4	6	4	22.3	22.3	96.557	7.9272e-156	257570000	347270000	303460000	3.02767e+08	136050000	166050000	180270000	160790000	125920000	166610000	123530000	1.38687e+08	1.88299	2.1831	1.15938	8	12	9	5	9	6
250	Capping protein (Actin filament) muscle Z-line, beta;Capping protein (Actin filament) muscle Z-line, beta, isoform CRA_d;Capping protein (Actin filament) muscle Z-line, beta, isoform CRA_a;CapZ beta;F-actin-capping protein subunit beta;cDNA FLJ43095 fis, clone CORDB2000541, highly similar to F-actin capping protein subunit beta	30.154	29.8945	30.1871	30.8709	31.0307	30.6722	30.87	30.7809	30.7723	+	+	+		13	8	9	8	7	8	10	9	9	11	38.9	38.9	37.455	0	1194700000	998020000	1222400000	1.13837e+09	1963600000	2193600000	1711000000	1.95607e+09	1962500000	1844900000	1833900000	1.88043e+09	0.581971	0.605378	1.04022	11	13	12	11	15	15
1028	APOBEC1-binding protein 1;Heterogeneous nuclear ribonucleoprotein A/B	32.8964	33.2941	32.9913	31.9651	32.2818	31.854	31.9163	31.7632	31.8468	+	+	+		13	11	13	12	10	12	9	9	10	10	31.3	31.3	35.967	8.5015e-137	7994800000	10532000000	8538500000	9.02177e+09	4192200000	5221500000	3881700000	4431800000	4052800000	3644800000	3862400000	3.85333e+09	2.03569	2.34129	1.15012	36	36	31	23	28	22
1609	50 kDa dynein-associated polypeptide;Dynactin complex 50 kDa subunit;Dynactin subunit 2;p50 dynamitin;cDNA FLJ31120 fis, clone IMR322000730, highly similar to Dynactin subunit 2;cDNA FLJ77785;Dynactin 2 (P50), isoform CRA_b	29.0528	29.3122	29.2454	30.1102	30.1151	30.3895	30.2753	30.1763	30.4515	+	+	+		13	7	9	10	8	10	11	10	12	10	43.1	43.1	44.809	4.1402e-206	556870000	666560000	636410000	6.19947e+08	1159000000	1162900000	1406500000	1242800000	1299500000	1213300000	1468300000	1.32703e+09	0.498831	0.467167	0.936525	9	13	16	14	14	20
2017	Platelet Sec1 protein;Protein unc-18 homolog 3;Protein unc-18 homolog C;Syntaxin-binding protein 3	28.007	28.2332	28.2814	26.7152	27.0868	26.7219	27.6274	27.4773	27.4166	+	+	+		13	9	12	10	5	6	5	6	9	7	30.9	30.9	67.764	1.4585e-127	269740000	315520000	326260000	303840000	110170000	142540000	110690000	1.21133e+08	207340000	186850000	179150000	1.91113e+08	2.50831	1.58984	0.63383	11	16	13	5	7	5
2656	Delta-aminolevulinic acid dehydratase;Porphobilinogen synthase	27.339	28.1951	28.3801	29.8787	29.7629	29.6751	29.6177	29.6785	29.9382	+	+	+		13	2	3	3	12	7	9	9	9	8	65.5	65.5	36.294	2.5737e-142	169770000	307310000	349340000	2.75473e+08	987160000	911040000	857230000	9.18477e+08	823760000	859250000	1028700000	9.03903e+08	0.299924	0.30476	1.01612	2	3	3	15	8	12
2820	Splicing factor U2AF 65 kDa subunit;U2 auxiliary factor 65 kDa subunit;U2 snRNP auxiliary factor large subunit	31.7507	31.8991	31.6146	30.3334	30.611	30.9151	30.6153	30.6213	30.695	+	+	+		13	12	13	12	11	11	13	10	11	13	42.1	42.1	53.5	0	3613400000	4004800000	3288100000	3.63543e+09	1352900000	1640000000	2024800000	1.67257e+09	1644800000	1651700000	1738300000	1.67827e+09	2.17357	2.16618	0.996604	33	36	32	24	24	31
2962	Actin regulatory protein CAP-G;Macrophage-capping protein;Putative uncharacterized protein CAPG;cDNA FLJ51488, highly similar to Macrophage capping protein	29.6165	29.4176	29.513	30.4804	30.848	30.5891	31.0083	31.1486	31.2823	+	+	+		13	5	7	7	9	8	8	9	10	12	64.9	64.9	38.498	2.399e-229	823130000	717100000	766130000	7.68787e+08	1498000000	1932700000	1615200000	1.68197e+09	2159800000	2380400000	2611600000	2.38393e+09	0.457076	0.322487	0.705543	8	10	10	13	16	14
2967	Acute-phase response factor;Signal transducer and activator of transcription 3	27.9114	27.605	27.6613	28.5731	28.5888	28.8133	28.5983	28.5483	28.6007	+	+	+		13	3	5	6	10	7	7	8	7	7	26.9	26.9	88.067	1.3075e-165	252450000	204150000	212260000	2.22953e+08	399370000	403730000	471700000	4.24933e+08	406390000	392550000	407060000	402000000	0.524678	0.55461	1.05705	4	6	6	12	9	9
3376	mRNA export factor;mRNA-associated protein mrnp 41;Rae1 protein homolog	31.0231	30.9552	30.72	30.2884	30.3129	30.2062	30.2511	30.1379	29.9783	+	+	+		13	11	11	11	10	11	10	10	10	11	59.8	59.8	40.968	0	2182100000	2081800000	1768600000	2.01083e+09	1311300000	1333800000	1238700000	1294600000	1277900000	1181400000	1057700000	1.17233e+09	1.55325	1.71524	1.10429	20	18	20	17	17	15
3571	Antioxidant enzyme AOE372;Peroxiredoxin IV;Peroxiredoxin-4;Thioredoxin peroxidase AO372;Thioredoxin-dependent peroxide reductase A0372	32.6682	32.8382	32.8421	33.5691	33.3576	33.4242	33.8785	33.9316	33.7023	+	+	+		13	9	8	9	13	11	10	11	11	11	65.7	58.7	30.54	3.0499e-227	6824900000	7678400000	7699500000	7.40093e+09	12744000000	11006000000	11526000000	1.17587e+10	15792000000	16384000000	13977000000	1.53843e+10	0.629402	0.481069	0.764327	22	18	23	44	29	24
4292	HEAT repeat-containing protein 2	28.0691	27.8416	28.2012	26.8716	26.317	26.8565	26.3845	26.1366	26.3064	+	+	+		13	7	8	10	5	4	3	5	3	2	20.1	20.1	93.52	2.2086e-143	281600000	240530000	308600000	276910000	122790000	83603000	121510000	109301000	87606000	73774000	82987000	8.14557e+07	2.53346	3.39952	1.34185	7	10	13	7	5	5
4335	Cell cycle and apoptosis regulatory protein 1;Cell division cycle and apoptosis regulator protein 1;Death inducer with SAP domain	27.5946	27.8432	28.0528	27.0014	27.0828	27.1762	26.3988	26.3974	26.8054	+	+	+		13	6	6	8	4	3	4	6	2	3	16.7	16.7	132.82	1.5742e-203	202670000	240790000	278440000	2.40633e+08	134350000	142150000	151650000	1.42717e+08	88480000	88391000	117280000	9.80503e+07	1.68609	2.45418	1.45554	6	8	10	4	4	5
449	28S ribosomal protein S29, mitochondrial;Death-associated protein 3;Ionizing radiation resistance conferring protein;cDNA FLJ57409, highly similar to Mitochondrial 28S ribosomal protein S29;Death associated protein 3, isoform CRA_d	29.5355	29.5537	29.3078	28.551	28.5575	28.0589	28.3148	28.1267	28.4924	+	+	+		14	11	11	10	10	8	6	9	9	7	48.5	48.5	45.566	2.3713e-251	778150000	788060000	664530000	743580000	393290000	395050000	279630000	355990000	333880000	293080000	377630000	3.34863e+08	2.08877	2.22055	1.06309	14	16	14	12	11	8
2898	14-3-3 protein sigma;Epithelial cell marker protein 1;Stratifin	29.3057	29.8361	30.0356	31.5212	31.6589	31.4487	32.1949	31.9179	31.8515	+	+	+		14	8	9	8	9	9	10	9	12	11	69.4	62.9	27.774	1.1804e-203	663570000	958420000	1100600000	907530000	3082000000	3390700000	2930800000	3134500000	4916300000	4057400000	3875000000	4282900000	0.289529	0.211896	0.731864	12	15	14	22	18	21
3160	Heterogeneous nuclear ribonucleoprotein F;Heterogeneous nuclear ribonucleoprotein F, N-terminally processed;Nucleolin-like protein mcs94-1;cDNA FLJ57121, highly similar to Heterogeneous nuclear ribonucleoprotein F	32.7454	32.3002	32.7835	31.3514	31.6285	31.4932	31.3658	31.4845	31.2695	+	+	+		14	12	14	13	13	11	12	13	12	11	60.7	60.7	45.671	0	7200000000	5288600000	7393000000	6627200000	2739700000	3319800000	3022700000	3027400000	2767300000	3004500000	2588500000	2.78677e+09	2.18907	2.3781	1.08635	29	37	50	23	25	23
4492	hTREX120;THO complex subunit 2	27.6444	27.4842	27.8016	26.8743	26.5969	26.9212	26.2994	26.5445	26.1632	+	+	+		14	6	10	13	8	6	5	6	6	2	14.1	14.1	182.77	1.3859e-112	209790000	187750000	233940000	2.10493e+08	123020000	101500000	127080000	117200000	82584000	97876000	75145000	8.52017e+07	1.79602	2.47053	1.37556	7	11	14	8	7	5
4697	Cell cycle progression restoration protein 2;FAST kinase domain-containing protein 4;Protein TBRG4;Transforming growth factor beta regulator 4;Putative uncharacterized protein TBRG4	29.4439	29.5591	29.2555	27.7953	27.654	27.5434	27.5941	28.4753	27.9004	+	+	+		14	9	11	8	5	6	5	8	5	7	39.1	39.1	70.737	8.9666e-153	730290000	791010000	640900000	7.20733e+08	232920000	211190000	195610000	213240000	202610000	373180000	250530000	275440000	3.37992	2.61666	0.774179	10	13	10	7	7	6
4709	65 kDa FK506-binding protein;FK506-binding protein 10;Immunophilin FKBP65;Peptidyl-prolyl cis-trans isomerase FKBP10;Rotamase	28.4124	28.7259	28.7808	29.312	29.5207	29.3665	29.3084	29.212	29.2734	+	+	+		14	8	11	10	12	13	11	10	13	11	31.4	31.4	64.244	2.0661e-198	357270000	443970000	461200000	4.20813e+08	666500000	770210000	692160000	7.09623e+08	664840000	621870000	648910000	6.45207e+08	0.593009	0.652215	1.09984	8	13	11	15	15	16
4874	Mitochondrial tRNA nucleotidyl transferase, CCA-adding;mt CCA-adding enzyme;mt tRNA adenylyltransferase;mt tRNA CCA-diphosphorylase;mt tRNA CCA-pyrophosphorylase;tRNA-nucleotidyltransferase 1, mitochondrial	28.6344	28.7603	28.7587	27.8501	28.0674	28.2488	28.0596	28.3584	28.3098	+	+	+		14	8	11	10	7	7	8	7	7	6	40.3	40.3	50.127	7.4434e-137	416690000	454690000	454190000	4.41857e+08	241950000	281270000	318950000	2.80723e+08	279750000	344140000	332730000	3.18873e+08	1.57399	1.38568	0.88036	11	14	13	8	9	11
4920	Synaptic vesicle membrane protein VAT-1 homolog;cDNA FLJ39753 fis, clone SMINT2018343, highly similar to Synaptic vesicle membrane protein VAT-1homolog (EC 1.-.-.-);cDNA, FLJ79487, highly similar to Synaptic vesicle membrane protein VAT-1homolog	29.4467	29.0733	29.1179	29.9761	30.1358	30.3004	30.7408	30.5504	30.8041	+	+	+		14	6	9	8	10	10	14	10	13	10	56.5	56.5	41.92	5.615e-192	731700000	564860000	582570000	6.26377e+08	1056100000	1179700000	1322300000	1.18603e+09	1794400000	1572500000	1874800000	1.74723e+09	0.528127	0.358496	0.678806	9	12	9	15	12	18
4978	Coronin-1B;Coronin-2	30.4624	30.711	30.3158	31.3685	31.3303	31.5978	31.7148	31.9474	31.7003	+	+	+		14	8	10	10	12	10	14	11	14	11	33.5	33.5	54.234	1.1086e-235	1479400000	1757700000	1336500000	1.52453e+09	2772500000	2700000000	3250100000	2.90753e+09	3524500000	4141100000	3489200000	3.71827e+09	0.524339	0.410012	0.781959	13	17	14	20	17	26
5238	EH domain-containing protein 1;PAST homolog 1;Testilin;cDNA FLJ55166, highly similar to EH-domain-containing protein 1;Putative uncharacterized protein EHD1	28.134	28.4171	28.2097	29.1516	29.0964	29.151	29.1632	29.2583	29.3605	+	+	+		14	6	6	8	6	10	9	7	9	7	44.8	41	60.626	1.1867e-222	294560000	358420000	310430000	3.21137e+08	596350000	573970000	596090000	5.88803e+08	601150000	642130000	689250000	6.44177e+08	0.545406	0.498523	0.91404	8	9	10	11	13	14
5267	Microsomal prostaglandin E synthase 2;Prostaglandin E synthase 2;Prostaglandin E synthase 2 truncated form;Prostaglandin E synthase 2, isoform CRA_c;Putative uncharacterized protein PTGES2	30.412	30.5161	30.3988	29.7707	29.4661	29.4344	29.7111	29.8012	30.0557	+	+	+		14	13	13	11	11	9	10	10	8	9	54.1	54.1	41.943	6.5523e-179	1428600000	1535500000	1415600000	1459900000	915930000	741610000	725520000	7.94353e+08	878900000	935500000	1116000000	976800000	1.83785	1.49457	0.81322	20	21	19	17	15	14
2019	Alcohol sulfotransferase;Hydroxysteroid sulfotransferase 2;Sulfotransferase family cytosolic 2B member 1	29.2844	29.2733	29.5622	30.6356	30.3612	30.669	30.7919	30.2224	30.6782	+	+	+		15	10	6	7	11	11	12	12	9	10	49.3	49.3	41.307	0	653870000	648860000	792730000	6.98487e+08	1668100000	1379200000	1707200000	1.58483e+09	1859000000	1252700000	1718100000	1.60993e+09	0.440732	0.433861	0.984409	12	10	11	15	16	17
2768	34 kDa nucleolar scleroderma antigen;rRNA 2-O-methyltransferase fibrillarin	31.2981	30.89	30.5162	29.3794	29.5709	29.0572	28.937	28.9692	29.0339	+	+	+		15	10	13	12	9	10	9	9	9	8	52	52	33.784	6.8996e-170	2640400000	1989800000	1535700000	2055300000	698370000	797480000	558570000	6.84807e+08	513930000	525520000	549630000	5.29693e+08	3.00129	3.88017	1.29284	19	21	19	10	13	12
2913	Mannose-6-phosphate isomerase;Phosphohexomutase;Phosphomannose isomerase;Mannose phosphate isomerase isoform	28.8542	28.1961	28.824	30.0162	29.8232	30.2024	30.1007	30.1697	30.2731	+	+	+		15	5	6	9	12	11	10	12	13	12	53	53	46.655	8.5989e-200	485250000	307520000	475220000	4.22663e+08	1085900000	949910000	1235500000	1.09044e+09	1151400000	1207800000	1297500000	1218900000	0.387609	0.346758	0.894607	5	6	11	13	12	13
2916	Cytoplasmic antiproteinase;Peptidase inhibitor 6;Placental thrombin inhibitor;Serpin B6	29.2219	28.8597	28.9943	30.0356	29.9178	29.9806	30.2621	30.2764	30.4098	+	+	+		15	8	10	11	12	11	11	11	12	11	47.3	47.3	42.621	0	626150000	487130000	534740000	549340000	1100600000	1014300000	1059400000	1058100000	1287700000	1300500000	1426500000	1.33823e+09	0.519176	0.410496	0.790669	11	12	12	15	14	14
3134	Galactokinase;Galactose kinase;Putative uncharacterized protein GALK1	30.3152	29.9446	30.0245	30.7876	30.9906	31.0344	30.9704	31.2361	31.3519	+	+	+		15	7	12	9	10	9	11	13	10	12	59.7	59.7	42.272	3.8998e-214	1335900000	1033300000	1092100000	1.15377e+09	1853500000	2133600000	2199300000	2.06213e+09	2103900000	2529300000	2740800000	2458000000	0.559501	0.469392	0.838948	9	16	14	17	18	19
3275	Actin-RPV;Alpha-centractin;ARP1;Centrosome-associated actin homolog;cDNA FLJ52800, highly similar to Alpha-centractin	28.7443	28.5106	28.9189	29.671	29.8632	29.9817	29.6686	30.1252	29.9627	+	+	+		15	7	11	8	14	12	14	12	13	13	56.9	55.3	42.613	0	449670000	382420000	507520000	4.46537e+08	854770000	976580000	1060200000	963850000	853360000	1171100000	1046300000	1.02359e+09	0.463284	0.436247	0.94164	8	14	13	21	19	23
3479	Elongation factor 1-alpha 2;Eukaryotic elongation factor 1 A-2;Statin-S1	32.4681	32.6452	32.6353	33.5314	33.2095	33.726	33.487	33.1002	33.4335	+	+	+		15	9	9	11	10	12	12	11	11	10	71.9	38.9	50.47	0	5941100000	6717000000	6671000000	6.44303e+09	12415000000	9932400000	14208000000	1.21851e+10	12039000000	9207800000	11601000000	1.09493e+10	0.528762	0.588444	1.11287	62	56	64	44	69	85
3840	Cell proliferation-inducing gene 54 protein;Sister chromatid cohesion protein 112;Sister chromatid cohesion protein PDS5 homolog A	28.4846	28.3041	28.4459	27.6022	27.8261	27.8406	27.2458	27.7299	27.2592	+	+	+		15	12	11	9	5	7	5	5	5	3	18.7	17.7	150.83	1.3677e-180	375590000	331430000	365640000	3.57553e+08	203740000	237960000	240350000	227350000	159150000	222600000	160630000	1.80793e+08	1.5727	1.97769	1.25751	12	13	12	5	7	5
4076	Calcium-binding mitochondrial carrier protein SCaMC-1;Mitochondrial ATP-Mg/Pi carrier protein 1;Mitochondrial Ca(2+)-dependent solute carrier protein 1;Small calcium-binding mitochondrial carrier protein 1;Solute carrier family 25 member 24	30.5761	30.6925	30.4469	29.3187	29.405	29.367	29.6553	29.4624	29.7977	+	+	+		15	13	14	12	11	10	10	11	10	12	44.2	44.2	53.354	0	1600800000	1735200000	1463600000	1.59987e+09	669580000	710880000	692400000	6.90953e+08	845570000	739690000	933240000	839500000	2.31545	1.90574	0.823053	25	21	21	16	15	15
4629	Differentiation-related gene 1 protein;Nickel-specific induction protein Cap43;N-myc downstream-regulated gene 1 protein;Protein NDRG1;Reducing agents and tunicamycin-responsive protein;Rit42;cDNA FLJ55222, highly similar to Protein NDRG1;cDNA FLJ33828 fis, clone CTONG2003599, highly similar to Protein NDRG1;N-myc downstream regulated gene 1, isoform CRA_a;cDNA FLJ53637, highly similar to Protein…	29.2108	28.5432	29.8462	33.2053	32.3836	32.3749	33.3997	32.8483	33.665	+	+	+		15	6	9	9	13	13	13	13	13	15	70.8	70.8	42.835	0	621340000	391160000	965130000	659210000	9903500000	5603200000	5569300000	7.02533e+09	11332000000	7732800000	13620000000	1.08949e+10	0.0938333	0.0605061	0.644826	10	12	15	37	30	35
5123	39S ribosomal protein L2, mitochondrial;39S ribosomal protein L37, mitochondrial	29.1739	28.9245	28.7033	27.8088	28.0259	27.8268	27.6136	27.463	27.7892	+	+	+		15	13	13	11	5	9	8	6	4	10	44.9	44.9	48.117	5.5312e-136	605630000	509510000	437060000	517400000	235110000	273290000	238070000	2.48823e+08	205360000	185010000	231950000	207440000	2.07939	2.49422	1.1995	18	14	13	5	11	9
5737	Antigen NY-CO-7;Carboxy terminus of Hsp70-interacting protein;CLL-associated antigen KW-8;E3 ubiquitin-protein ligase CHIP;STIP1 homology and U box-containing protein 1	29.6509	29.7437	30.1574	31.2416	31.3666	31.1004	31.2173	31.171	31.0605	+	+	+		15	8	9	10	8	13	10	10	11	10	60.1	60.1	34.856	2.6366e-250	842950000	898980000	1197500000	979810000	2538900000	2768800000	2302200000	2.53663e+09	2496500000	2417700000	2239500000	2.38457e+09	0.386264	0.410896	1.06377	11	14	16	16	22	21
5749	NSFL1 cofactor p47;p97 cofactor p47;UBX domain-containing protein 2C	28.6147	28.7068	28.6168	29.4754	29.2642	29.4923	29.448	29.4994	29.5258	+	+	+		15	7	12	8	10	9	8	10	8	7	45.7	45.7	40.816	0	411040000	438130000	411630000	4.20267e+08	746400000	644760000	755190000	715450000	732390000	758930000	772940000	7.54753e+08	0.587416	0.556827	0.947926	8	12	9	11	10	9
5810	Nucleolar protein 5;Nucleolar protein 58	29.173	29.3324	28.9451	27.1639	27.1375	27.4564	26.6713	27.0499	26.6468	+	+	+		15	12	10	10	5	4	5	5	4	4	36.9	36.9	59.578	2.0319e-286	605270000	675990000	516810000	5.99357e+08	150370000	147640000	184160000	1.60723e+08	106870000	138940000	105070000	116960000	3.72912	5.12446	1.37417	17	13	13	4	4	6
770	Inactive ubiquitin-specific peptidase 39;SAD1 homolog;U4/U6.U5 tri-snRNP-associated 65 kDa protein;U4/U6.U5 tri-snRNP-associated protein 2;Putative uncharacterized protein USP39;cDNA FLJ59519, highly similar to U4/U6.U5 tri-snRNP-associated protein 2	28.806	28.7064	28.5667	27.2975	26.8658	27.342	27.4696	27.2407	26.901	+	+	+		16	9	13	10	10	9	8	7	6	8	39.6	39.6	65.38	6.7451e-273	469320000	438010000	397600000	4.34977e+08	164960000	122300000	170120000	152460000	185860000	158590000	125320000	156590000	2.85305	2.77781	0.973625	16	22	16	15	14	12
895	Putative uncharacterized protein UGP2;UDP-glucose pyrophosphorylase;UTP--glucose-1-phosphate uridylyltransferase	30.2591	30.166	30.2824	31.0088	30.9127	30.9762	30.9792	30.8681	31.1574	+	+	+		16	11	14	10	12	13	12	13	12	11	42.2	42.2	57.805	0	1285000000	1204700000	1305900000	1265200000	2160700000	2021400000	2112300000	2.09813e+09	2116800000	1959900000	2395100000	2.15727e+09	0.603012	0.586483	0.972589	18	20	17	23	20	23
2172	SNU66 homolog;Squamous cell carcinoma antigen recognized by T cells 1;U4/U6.U5 tri-snRNP-associated 110 kDa protein;U4/U6.U5 tri-snRNP-associated protein 1	28.9204	29.0175	28.6693	27.7712	27.5976	27.6052	27.4551	26.8199	26.4909	+	+	+		16	10	10	15	7	7	8	6	4	5	27.5	27.5	90.254	4.2026e-201	508060000	543430000	426890000	4.92793e+08	229070000	203100000	204170000	2.12113e+08	184000000	118470000	94312000	1.32261e+08	2.32325	3.72593	1.60375	11	12	18	7	7	8
2711	CD49 antigen-like family member B;Collagen receptor;Integrin alpha-2;Platelet membrane glycoprotein Ia;VLA-2 subunit alpha	27.6917	28.2545	28.164	25.5647	25.2909	25.7038	25.1656	25.3395	25.6996	+	+	+		16	9	14	12	4	4	4	2	3	4	17.8	17.8	129.29	0	216790000	320230000	300760000	279260000	49629000	41050000	54655000	4.84447e+07	37635000	42458000	54496000	44863000	5.76451	6.22473	1.07984	10	18	17	4	4	4
2849	Antigen NY-CO-4;Elongation factor 1-delta	31.6826	31.8457	31.989	32.456	32.5821	32.6439	32.6834	32.466	32.6688	+	+	+		16	10	12	11	11	10	13	11	15	11	26.8	26.8	76.569	0	3446800000	3859300000	4262500000	3856200000	5891600000	6429500000	6711100000	6.34407e+09	6897200000	5932600000	6828000000	6552600000	0.607844	0.588499	0.968175	24	27	29	25	27	34
2901	Natural killer cell-enhancing factor B;Peroxiredoxin-2;PRP;Thiol-specific antioxidant protein;Thioredoxin peroxidase 1;Thioredoxin-dependent peroxide reductase 1;Peroxiredoxin 2, isoform CRA_a;Putative uncharacterized protein PRDX2	31.504	31.3557	31.5702	32.5104	32.6578	32.6141	32.919	32.6577	32.4689	+	+	+		16	8	11	9	11	13	11	14	12	12	81.3	75.8	21.892	2.5749e-244	3045500000	2748000000	3188400000	2.99397e+09	6117900000	6775900000	6573700000	6.48917e+09	8120700000	6775600000	5944300000	6.94687e+09	0.461379	0.430981	0.934114	35	27	23	63	47	43
2911	Glycine hydroxymethyltransferase;Serine hydroxymethyltransferase, cytosolic;Serine methylase;Serine hydroxymethyltransferase	28.5451	28.6298	28.5347	29.5173	29.095	29.3808	29.614	29.5644	29.5068	+	+	+		16	6	6	7	9	6	8	12	12	12	57.8	57.8	53.082	2.5907e-292	391680000	415350000	388880000	3.98637e+08	768400000	573410000	699060000	680290000	821700000	793880000	762820000	792800000	0.58598	0.502821	0.858085	6	7	9	13	8	11
2927	Insulin receptor substrate 1	28.9239	29.4915	29.6592	27.4621	27.1688	28.0024	27.902	27.9021	28.0105	+	+	+		16	7	13	12	2	3	2	4	4	2	24.6	24.6	131.59	7.4067e-201	509290000	754780000	847830000	7.03967e+08	184890000	150880000	268890000	2.01553e+08	250810000	250830000	270400000	2.57347e+08	3.49271	2.73548	0.783198	8	15	13	2	3	4
3416	G patch domain-containing protein 9;RNA-binding motif protein 10;RNA-binding protein 10;RNA-binding protein S1-1	29.0998	29.1632	28.9082	28.3046	28.2923	28.1407	27.6344	27.8252	28.1312	+	+	+		16	11	11	8	8	6	8	7	5	5	24	24	103.53	9.4219e-252	575330000	601150000	503780000	5.60087e+08	331540000	328720000	295930000	318730000	208340000	237810000	293990000	2.46713e+08	1.75724	2.27019	1.2919	15	14	11	10	7	10
3666	Guanine nucleotide-binding protein subunit alpha-13	30.1864	30.2767	30.0821	29.2561	29.3339	29.206	29.6519	29.3015	29.435	+	+	+		16	12	14	13	11	9	9	11	11	8	46.4	46.4	44.049	1.1031e-163	1221800000	1300800000	1136600000	1.21973e+09	641140000	676690000	619260000	6.45697e+08	843530000	661640000	725800000	7.43657e+08	1.88902	1.64018	0.868273	20	24	22	14	14	16
4595	Pre-mRNA-processing factor 31;Serologically defined breast cancer antigen NY-BR-99;U4/U6 small nuclear ribonucleoprotein Prp31;U4/U6 snRNP 61 kDa protein	28.801	28.7428	29.1034	27.7573	27.7495	28.116	27.8486	27.8541	27.8551	+	+	+		16	11	14	13	7	6	8	5	8	7	46.3	46.3	55.455	5.7637e-187	467690000	449190000	576760000	497880000	226880000	225650000	290910000	2.47813e+08	241690000	242610000	242780000	242360000	2.00909	2.0543	1.0225	13	16	18	9	8	9
5374	DEAD box protein 21;Gu-alpha;Nucleolar RNA helicase 2;Nucleolar RNA helicase Gu;Nucleolar RNA helicase II;RH II/Gu	28.7214	28.571	28.4533	26.9934	27.3807	27.4893	27.4063	27.6194	27.2109	+	+	+		16	8	12	14	6	8	8	8	8	5	29.8	29.8	87.343	3.0468e-88	442600000	398770000	367520000	4.02963e+08	133610000	174750000	188410000	165590000	177880000	206190000	155340000	1.79803e+08	2.4335	2.24113	0.920951	10	14	17	6	10	9
1128	E3 ubiquitin-protein ligase UBR5;E3 ubiquitin-protein ligase, HECT domain-containing 1;Hyperplastic discs protein homolog;Progestin-induced protein	28.3028	28.0884	28.2929	27.7461	27.7775	27.7456	27.2443	27.58	27.5813	+	+	+		17	5	9	11	10	7	8	4	5	5	10.1	10.1	309.35	1.9526e-182	331120000	285400000	328850000	3.15123e+08	225120000	230070000	225040000	2.26743e+08	158980000	200630000	200810000	1.86807e+08	1.38978	1.6869	1.21379	6	9	12	10	7	8
1710	56 kDa U2AF65-associated protein;ATP-dependent RNA helicase p47;DEAD box protein UAP56;HLA-B-associated transcript 1 protein;Spliceosome RNA helicase BAT1;HLA-B associated transcript 1;cDNA FLJ53073, highly similar to Spliceosome RNA helicase Bat1 (EC 3.6.1.-);HCG2005638, isoform CRA_c	31.4061	31.3907	31.3576	30.0093	30.3769	30.4849	30.0565	29.6895	30.041	+	+	+		17	16	16	15	11	12	14	11	14	9	49.4	49.4	50.745	8.4929e-148	2845600000	2815500000	2751500000	2804200000	1080700000	1394300000	1502700000	1325900000	1116600000	865800000	1104700000	1.02903e+09	2.11494	2.72508	1.28849	29	28	27	17	17	18
1715	Helix-destabilizing protein;Heterogeneous nuclear ribonucleoprotein A1;hnRNP core protein A1;Single-strand RNA-binding protein;Heterogeneous nuclear ribonucleoprotein A1-like 2;hnRNP core protein A1-like 2	33.3817	33.7094	33.6454	32.1698	32.3753	32.3295	32.3855	32.1205	32.2205	+	+	+		17	15	15	12	12	13	12	13	12	14	50	45.4	38.746	0	11192000000	14046000000	13436000000	1.28913e+10	4831500000	5571000000	5396900000	5.26647e+09	5610400000	4669200000	5004300000	5.09463e+09	2.44781	2.53038	1.03373	208	176	192	60	63	48
2047	Nucleolar protein 56;Nucleolar protein 5A	30.8416	30.7892	30.5483	29.2946	29.6544	29.2785	29.3385	28.5975	29.0293	+	+	+		17	10	13	13	4	5	5	6	6	5	39.2	39.2	66.049	2.4079e-133	1924200000	1855500000	1570200000	1783300000	658480000	844990000	651190000	718220000	678860000	406180000	547890000	544310000	2.48294	3.27626	1.31951	21	22	21	11	12	12
2584	D-fructose-1,6-bisphosphate 1-phosphohydrolase 1;Fructose-1,6-bisphosphatase 1	32.402	31.9675	32.5048	34.5213	34.2674	34.273	34.3556	34.1485	34.3235	+	+	+		17	10	14	11	17	13	16	16	16	15	54.1	54.1	36.842	0	5675100000	4199200000	6094200000	5.32283e+09	24658000000	20679000000	20759000000	22032000000	21982000000	19042000000	21498000000	2.08407e+10	0.241596	0.255406	1.05716	29	29	29	73	49	59
2654	Procollagen-proline,2-oxoglutarate-4-dioxygenase subunit alpha-1;Prolyl 4-hydroxylase subunit alpha-1;Putative uncharacterized protein P4HA1	28.8914	29.155	29.2857	31.1182	31.1945	31.2125	31.4678	31.396	31.3861	+	+	+		17	7	7	8	13	12	15	15	14	14	35.4	35.4	61.049	1.6306e-298	497940000	597760000	654460000	5.83387e+08	2330900000	2457500000	2488300000	2.42557e+09	2969900000	2825800000	2806500000	2867400000	0.240516	0.203455	0.845912	8	6	9	16	17	17
2682	Glucosamine-6-sulfatase;N-acetylglucosamine-6-sulfatase;cDNA FLJ54262, highly similar to N-acetylglucosamine-6-sulfatase (EC 3.1.6.14);cDNA FLJ51090, highly similar to N-acetylglucosamine-6-sulfatase (EC 3.1.6.14)	29.2007	29.476	29.4827	31.1883	30.9861	30.6562	31.4545	31.1788	31.5189	+	+	+		17	7	9	8	10	12	12	15	13	13	42.6	42.6	62.081	0	617010000	746720000	750200000	7.04643e+08	2446800000	2126900000	1692100000	2088600000	2942800000	2430800000	3077000000	2.81687e+09	0.337376	0.250151	0.741462	8	9	9	17	16	18
2764	Catechol O-methyltransferase	30.618	30.8358	31.0152	32.4694	32.1105	32.1641	32.5295	32.4596	32.4332	+	+	+		17	7	12	10	14	13	14	17	13	13	68.3	68.3	30.037	0	1647900000	1916400000	2170200000	1911500000	5946600000	4636800000	4812300000	5131900000	6199300000	5906300000	5799000000	5968200000	0.372474	0.320281	0.859874	16	21	17	26	21	25
3206	Basolateral Na-K-Cl symporter;Bumetanide-sensitive sodium-(potassium)-chloride cotransporter 1;Solute carrier family 12 member 2	27.8229	27.9803	28.6982	29.895	30.4445	30.4294	30.1348	30.0827	30.0686	+	+	+		17	4	4	7	13	14	13	13	12	11	21.2	21.2	131.45	5.0638e-232	237420000	264800000	435530000	3.12583e+08	998400000	1461200000	1446000000	1.30187e+09	1178900000	1137100000	1126000000	1.14733e+09	0.240104	0.272443	1.13469	5	5	10	18	21	22
3305	14-3-3 protein epsilon	31.3978	31.3017	31.3877	32.3925	32.4167	32.1108	32.3557	32.8312	32.2034	+	+	+		17	11	13	12	10	12	9	13	12	10	53.7	46.7	29.174	1.1831e-221	2829300000	2647000000	2809600000	2.76197e+09	5638000000	5733300000	4637800000	5.33637e+09	5495900000	7641600000	4945400000	6.02763e+09	0.517574	0.458217	0.885317	27	24	22	45	37	25
3524	Cleavage and polyadenylation specificity factor 160 kDa subunit;Cleavage and polyadenylation specificity factor subunit 1	29.012	29.0784	28.7182	27.8238	27.7175	27.3558	27.4714	27.6548	27.9853	+	+	+		17	8	13	10	6	5	4	4	3	4	16.9	16.9	160.88	1.2866e-179	541340000	566860000	441620000	5.16607e+08	237580000	220700000	171760000	2.10013e+08	186080000	211320000	265710000	2.21037e+08	2.45988	2.3372	0.950129	10	16	12	7	4	4
3860	ATP-dependent dihydroxyacetone kinase;Bifunctional ATP-dependent dihydroxyacetone kinase/FAD-AMP lyase (cyclizing);FAD-AMP lyase (cyclic FMN forming);FAD-AMP lyase (cyclizing);FMN cyclase;Glycerone kinase	29.7034	29.4207	29.7983	30.281	30.3388	30.4462	30.2627	30.2785	30.4569	+	+	+		17	11	13	12	13	12	14	13	13	13	45	45	58.946	0	874190000	718630000	933670000	8.42163e+08	1304600000	1358000000	1462900000	1.37517e+09	1288200000	1302400000	1473800000	1354800000	0.612408	0.621615	1.01503	15	19	17	21	22	24
4797	Endoplasmic oxidoreductin-1-like protein;ERO1-like protein alpha;Oxidoreductin-1-L-alpha	28.8145	28.625	28.6181	30.9184	30.1853	29.9455	31.0459	30.625	31.4309	+	+	+		17	5	6	8	16	15	15	17	14	15	39.7	39.7	54.392	0	472090000	413990000	412000000	4.32693e+08	2029400000	1220900000	1033900000	1.42807e+09	2216900000	1655900000	2895000000	2.25593e+09	0.302992	0.191802	0.633027	7	6	9	22	22	20
1271	Cell cycle regulatory protein;Chromosome condensation protein 1;Regulator of chromosome condensation;Putative uncharacterized protein RCC1	30.7584	30.9258	30.746	29.154	29.4489	29.3794	29.7458	29.723	29.6037	+	+	+		18	14	18	13	11	9	10	11	11	11	57.5	57.5	48.145	0	1816400000	2039800000	1800800000	1.88567e+09	597360000	732840000	698350000	6.76183e+08	900290000	886170000	815840000	8.67433e+08	2.78869	2.17385	0.779522	20	26	21	13	11	15
1292	Cervical mucin;High molecular weight salivary mucin MG1;Mucin-5 subtype B, tracheobronchial;Mucin-5B;Sublingual gland mucin	17.3927	16.4127	16.827	27.7596	27.7828	26.7505	28.5827	28.6284	29.0873	+	+	+		18	0	1	0	6	4	4	11	10	13	9.2	9.2	596.68	1.2285e-117	0	0	0	0	227240000	230910000	112900000	190350000	402030000	414970000	570340000	4.62447e+08	5.25348e-09	2.16241e-09	0.411615	0	1	0	6	4	5
1315	RRP12-like protein	27.5562	27.1972	27.3528	26.0388	25.5106	25.9347	25.6642	25.9103	24.612	+	+	+		18	8	12	13	5	4	7	3	4	3	23.4	23.4	143.7	6.3316e-239	197360000	153880000	171400000	1.74213e+08	68940000	47804000	64138000	60294000	53174000	63064000	25642000	4.72933e+07	2.8894	3.68368	1.27489	9	12	15	6	5	7
2573	Anchorin CII;Annexin A5;Annexin V;Annexin-5;Calphobindin I;Endonexin II;Lipocortin V;Placental anticoagulant protein 4;Placental anticoagulant protein I;Thromboplastin inhibitor;Vascular anticoagulant-alpha	30.9874	30.9622	31.1386	31.9197	31.7938	31.6893	32.1941	31.9418	32.1001	+	+	+		18	10	11	11	12	14	12	13	14	15	61.2	61.2	35.936	0	2128800000	2092000000	2364000000	2.19493e+09	4062500000	3723000000	3462700000	3749400000	4913400000	4125100000	4603600000	4.54737e+09	0.585409	0.482682	0.824521	21	24	24	26	27	30
2627	DNA topoisomerase 1;DNA topoisomerase I	29.7395	29.8137	29.3563	27.8	27.4998	27.889	28.4237	28.3522	28.3133	+	+	+		18	12	14	12	7	6	7	8	6	8	26.8	26.8	90.725	9.7688e-283	896370000	943690000	687260000	842440000	233680000	189790000	248550000	2.24007e+08	360070000	342650000	333540000	345420000	3.76078	2.43889	0.648505	15	16	14	8	6	7
2709	Aspartate aminotransferase, cytoplasmic;Glutamate oxaloacetate transaminase 1;Transaminase A;cDNA FLJ51134, highly similar to Aspartate aminotransferase, cytoplasmic (EC 2.6.1.1);cDNA FLJ53826, highly similar to Aspartate aminotransferase, cytoplasmic (EC 2.6.1.1)	30.5964	30.276	30.2171	31.0954	31.0894	31.2094	31.202	31.109	31.1232	+	+	+		18	11	13	13	13	17	13	16	17	15	63.4	63.4	46.247	4.7365e-268	1623400000	1300100000	1248100000	1.39053e+09	2294300000	2284700000	2482900000	2.35397e+09	2470300000	2316100000	2339000000	2.37513e+09	0.590719	0.585455	0.991088	19	17	18	23	27	24
3153	Heterogeneous nuclear ribonucleoprotein A3	32.0342	32.3292	31.7803	30.6468	30.9661	30.4448	30.8394	30.7545	30.6942	+	+	+		18	14	17	13	9	10	13	10	11	10	50	50	39.594	1.0435e-240	4397900000	5395700000	3688400000	4494000000	1681200000	2097600000	1461500000	1.74677e+09	1921200000	1811400000	1737300000	1823300000	2.57275	2.46476	0.958025	20	28	20	11	14	17
4088	Coiled-coil and C2 domain-containing protein 1A;Five repressor element under dual repression-binding protein 1;Putative NF-kappa-B-activating protein 023N	28.2303	28.413	28.5204	29.325	29.4712	29.2247	29.246	28.9003	29.0576	+	+	+		18	5	11	7	9	10	12	8	11	9	27.7	27.7	104.06	2.6094e-174	314900000	357400000	385030000	3.52443e+08	672540000	744240000	627340000	6.81373e+08	636700000	501010000	558730000	565480000	0.517254	0.623264	1.20495	5	12	7	10	13	13
4498	Similar to AFG3 ATPase family gene 3-like 2 (Yeast);AFG3-like protein 2;Paraplegin-like protein	28.2777	28.3	27.9846	27.2435	27.2947	27.4062	27.094	27.294	27.2284	+	+	+		18	12	13	8	7	5	7	7	12	6	25.2	25.2	90.193	2.3539e-147	325420000	330480000	265580000	307160000	158900000	164630000	177870000	1.67133e+08	143250000	164560000	157240000	1.55017e+08	1.83781	1.98146	1.07816	13	14	10	7	6	8
4527	3-5 RNA exonuclease OLD35;PNPase old-35;Polynucleotide phosphorylase 1;Polynucleotide phosphorylase-like protein;Polyribonucleotide nucleotidyltransferase 1, mitochondrial	29.1447	28.9703	28.5574	27.5796	27.4038	27.7042	27.6463	27.5566	27.7074	+	+	+		18	9	15	11	3	5	7	3	4	4	30.8	30.8	85.95	8.8176e-173	593500000	525950000	395040000	504830000	200580000	177570000	218680000	1.98943e+08	210070000	197410000	219160000	208880000	2.53756	2.41684	0.952429	12	18	14	4	6	7
8	Acetolactate synthase-like protein;IlvB-like protein	27.4485	27.2026	27.3082	29.4037	28.7655	29.0176	29.5465	29.6582	29.7974	+	+	+		19	7	9	8	15	14	15	15	15	16	54.1	54.1	67.867	0	183150000	154450000	166180000	1.67927e+08	710210000	456340000	543450000	570000000	784130000	847230000	933060000	8.54807e+08	0.294608	0.19645	0.666817	8	12	13	29	21	29
1556	4F2 cell-surface antigen heavy chain;4F2 heavy chain antigen;Lymphocyte activation antigen 4F2 large subunit;cDNA FLJ54090, highly similar to 4F2 cell-surface antigen heavy chain	32.3477	32.0825	32.5326	30.097	30.0368	30.1846	29.9493	30.0633	30.0926	+	+	+		19	13	15	18	11	11	12	9	11	11	38.9	38.9	71.122	0	5465600000	4547800000	6212700000	5408700000	1148400000	1101500000	1220300000	1.15673e+09	1036700000	1121900000	1144900000	1.10117e+09	4.67584	4.91179	1.05046	28	24	37	14	16	15
2167	D-3-phosphoglycerate dehydrogenase;Phosphoglycerate dehydrogenase	32.0912	32.4538	32.015	30.8056	30.8168	30.5217	30.7149	30.6958	30.9997	+	+	+		19	18	17	14	10	10	12	12	12	12	45	45	56.65	0	4575200000	5882700000	4339900000	4932600000	1876800000	1891400000	1541500000	1769900000	1762400000	1739200000	2147100000	1882900000	2.78694	2.61968	0.939986	37	39	36	19	21	20
2350	Cytosolic NADP-isocitrate dehydrogenase;IDP;Isocitrate dehydrogenase [NADP] cytoplasmic;NADP(+)-specific ICDH;Oxalosuccinate decarboxylase	30.0036	30.0084	29.9087	30.7022	30.4679	30.6772	30.8877	30.5627	31.0659	+	+	+		19	9	12	14	13	16	15	14	13	16	57.7	55.6	46.659	0	1076400000	1080000000	1007900000	1.05477e+09	1747000000	1485100000	1716900000	1.64967e+09	1986700000	1585900000	2247800000	1.94013e+09	0.639382	0.543657	0.850285	14	19	23	22	27	25
2594	Brain-type aldolase;Fructose-bisphosphate aldolase C;Fructose-bisphosphate aldolase	29.5599	29.2689	29.6641	32.8508	32.446	32.2646	32.8356	32.5382	32.6188	+	+	+		19	6	8	8	15	17	13	14	15	16	73.9	57.4	39.455	0	791440000	646860000	850710000	7.63003e+08	7745800000	5850900000	5159600000	6252100000	7664700000	6237200000	6595500000	6.83247e+09	0.12204	0.111673	0.915058	9	10	11	68	39	25
2879	Guanosine diphosphate dissociation inhibitor 1;Oligophrenin-2;Protein XAP-4;Rab GDP dissociation inhibitor alpha;cDNA FLJ52902, highly similar to Rab GDP dissociation inhibitor alpha	30.3879	30.0139	30.2223	31.6871	31.352	31.5503	31.5981	31.3657	31.4971	+	+	+		19	11	12	10	15	17	15	16	16	13	63.5	42.1	50.582	0	1405000000	1084100000	1252600000	1.24723e+09	3457600000	2740900000	3144700000	3114400000	3250600000	2767100000	3030800000	3.01617e+09	0.400473	0.413516	1.03257	13	14	15	20	22	22
3437	Adenylyl cyclase-associated protein 1;Adenylyl cyclase-associated protein	29.962	29.9338	29.7758	30.6112	30.4095	30.5474	30.77	30.6101	30.7803	+	+	+		19	9	14	11	9	10	13	11	13	13	42.9	42.9	51.901	0	1045800000	1025600000	919200000	9.96867e+08	1640200000	1426200000	1569200000	1545200000	1831000000	1638900000	1844100000	1.77133e+09	0.645138	0.562778	0.872337	12	20	19	15	18	25
4582	Sec1 family domain-containing protein 1;SLY1 homolog;Syntaxin-binding protein 1-like 2;cDNA FLJ57213, highly similar to Sec1 family domain-containing protein 1;cDNA FLJ61324, highly similar to Sec1 family domain-containing protein 1;cDNA, FLJ79111, highly similar to Sec1 family domain-containing protein 1;Sec1 family domain containing 1, isoform CRA_b;cDNA FLJ58209, highly similar to Sec1 family …	30.1089	30.146	30.0034	29.595	29.3577	29.459	29.7614	29.8003	29.717	+	+	+		19	13	16	14	14	14	12	15	16	13	42.1	42.1	72.379	0	1157900000	1188100000	1076300000	1.14077e+09	810920000	687920000	737950000	7.45597e+08	910050000	934960000	882470000	909160000	1.53001	1.25475	0.820094	18	21	20	20	18	14
5045	100 kDa U5 snRNP-specific protein;DEAD box protein 23;Probable ATP-dependent RNA helicase DDX23;PRP28 homolog;U5-100kD	28.9987	28.9077	28.9757	27.6331	28.2099	27.649	27.8504	27.5181	28.0688	+	+	+		19	12	13	11	5	6	9	5	5	5	26.3	26.3	95.581	6.0908e-44	536380000	503610000	527890000	5.22627e+08	208150000	310470000	210460000	2.43027e+08	241990000	192210000	281540000	238580000	2.15049	2.19057	1.01864	12	14	12	6	9	9
558	Lysosomal acid alpha-mannosidase;Lysosomal alpha-mannosidase;Lysosomal alpha-mannosidase A peptide;Lysosomal alpha-mannosidase B peptide;Lysosomal alpha-mannosidase C peptide;Lysosomal alpha-mannosidase D peptide;Lysosomal alpha-mannosidase E peptide;Mannosidase alpha class 2B member 1;Mannosidase alpha-B;cDNA FLJ54572, highly similar to Lysosomal alpha-mannosidase (EC 3.2.1.24)	29.1711	29.3498	29.1259	30.0305	29.9936	29.6848	29.8242	30.0235	30.0895	+	+	+		20	7	14	13	14	13	12	11	12	11	32.2	32.2	113.74	0	604460000	684160000	585830000	6.24817e+08	1096700000	1069000000	863030000	1.00958e+09	950550000	1091400000	1142500000	1.06148e+09	0.61889	0.588626	0.9511	8	17	13	16	20	15
1235	Pre-mRNA-splicing factor 3;U4/U6 small nuclear ribonucleoprotein Prp3;U4/U6 snRNP 90 kDa protein	29.1714	29.3756	29.2312	28.202	28.4336	28.0745	27.9247	27.9426	28.1256	+	+	+		20	12	15	12	9	8	6	6	8	5	38.1	38.1	77.528	2.1713e-209	604590000	696530000	630200000	6.43773e+08	308770000	362550000	282670000	3.17997e+08	254790000	257970000	292850000	2.68537e+08	2.02447	2.39734	1.18418	15	21	16	9	11	6
3485	D-fructose-6-phosphate amidotransferase 1;Glucosamine--fructose-6-phosphate aminotransferase [isomerizing] 1;Glutamine:fructose 6 phosphate amidotransferase 1;Hexosephosphate aminotransferase 1	29.7502	29.6955	29.7341	30.9705	30.9708	31.3478	31.364	31.2235	31.3663	+	+	+		20	10	11	11	12	12	15	16	10	13	35.8	35.8	78.806	4.0236e-291	903020000	869430000	893040000	8.88497e+08	2104000000	2104400000	2732900000	2.31377e+09	2763800000	2507400000	2768200000	2679800000	0.384004	0.331553	0.86341	15	14	16	17	16	22
3820	Kynureninase;L-kynurenine hydrolase	31.1625	31.2469	30.9717	32.6271	32.3191	32.5998	32.2052	32.3573	32.2809	+	+	+		20	11	11	10	14	11	14	13	14	13	56.1	56.1	52.351	0	2403500000	2548400000	2105800000	2.35257e+09	6633300000	5358200000	6508900000	6166800000	4951400000	5501800000	5218300000	5.22383e+09	0.381489	0.450353	1.18051	19	20	18	27	19	27
4658	210 kDa cornified envelope precursor protein;210 kDa paraneoplastic pemphigus antigen;Envoplakin;p210	27.8695	27.9272	27.9471	28.0942	28.1562	28.1918	28.6674	28.542	28.2811	+	+	+		20	5	13	8	8	7	7	11	8	10	15.6	15.6	231.6	1.4484e-180	245220000	255220000	258770000	253070000	286550000	299120000	306610000	2.97427e+08	426330000	390830000	326190000	3.81117e+08	0.850865	0.664022	0.780408	5	14	8	8	7	7
4809	Far upstream element-binding protein 3;Putative uncharacterized protein FUBP3	31.1245	31.4868	31.4079	30.3443	30.4491	30.5586	30.2374	30.4731	30.3089	+	+	+		20	14	18	16	11	12	13	11	10	13	58.7	55.8	61.64	0	2341100000	3009300000	2849100000	2.73317e+09	1363200000	1465900000	1581400000	1.47017e+09	1265800000	1490400000	1330100000	1362100000	1.85909	2.00658	1.07934	17	26	26	14	13	14
4868	Paraspeckle protein 2;RNA-binding motif protein 14;RNA-binding protein 14;RRM-containing coactivator activator/modulator;Synaptotagmin-interacting protein	31.4558	31.6426	31.3164	30.6542	30.4768	30.105	29.9577	29.8281	29.905	+	+	+		20	13	17	15	13	14	13	13	14	10	35	35	69.491	0	2945300000	3352500000	2674100000	2.99063e+09	1689800000	1494300000	1154800000	1446300000	1042700000	953120000	1005300000	1.00037e+09	2.06778	2.98952	1.44576	20	29	27	17	20	16
5766	48 kDa TATA box-binding protein-interacting protein;51 kDa erythrocyte cytosolic protein;INO80 complex subunit J;Repressing pontin 52;RuvB-like 2;TIP49b;TIP60-associated protein 54-beta;cDNA FLJ32936 fis, clone TESTI2007533, highly similar to RuvB-like 2 (EC 3.6.1.-);RuvB-like 2 (E. coli), isoform CRA_a	30.1338	29.9883	29.9393	28.8076	28.934	29.084	28.6553	28.6086	28.7445	+	+	+		20	16	13	15	10	12	11	12	13	10	45.1	45.1	51.156	1.295e-218	1178100000	1065100000	1029500000	1090900000	469850000	512870000	569070000	5.17263e+08	422780000	409290000	449720000	4.27263e+08	2.10898	2.55323	1.21064	20	18	19	10	14	15
5773	49 kDa TATA box-binding protein-interacting protein;54 kDa erythrocyte cytosolic protein;INO80 complex subunit H;Nuclear matrix protein 238;Pontin 52;RuvB-like 1;TIP49a;TIP60-associated protein 54-alpha	30.7613	30.8222	30.6226	29.7131	29.7576	29.7142	29.783	29.5616	30.043	+	+	+		20	13	17	14	13	13	11	14	14	11	53.9	53.9	50.227	5.4872e-278	1820000000	1898500000	1653200000	1.79057e+09	880080000	907690000	880780000	8.89517e+08	923830000	792380000	1106200000	9.40803e+08	2.01297	1.90323	0.945486	25	33	31	20	22	17
2166	PRP4 homolog;U4/U6 small nuclear ribonucleoprotein Prp4;U4/U6 snRNP 60 kDa protein;WD splicing factor Prp4	30.1157	30.5382	30.4272	29.2975	29.5006	29.445	29.4794	29.5259	29.5302	+	+	+		21	13	18	19	12	10	13	11	13	12	51.1	51.1	58.449	8.2057e-173	1163400000	1559200000	1443800000	1388800000	659810000	759540000	730850000	7.16733e+08	748500000	773000000	775300000	765600000	1.93768	1.814	0.936172	15	25	26	14	12	16
3054	2,3-epoxysqualene--lanosterol cyclase;Lanosterol synthase;Oxidosqualene--lanosterol cyclase	29.4392	29.1197	29.1579	30.0858	29.9627	29.94	30.3091	30.1225	30.2224	+	+	+		21	11	11	13	13	18	17	15	17	18	38.8	38.8	83.308	3.6392e-260	727890000	583330000	598980000	6.36733e+08	1139500000	1046300000	1030000000	1.07193e+09	1330300000	1168900000	1252700000	1.25063e+09	0.594005	0.509129	0.857112	15	16	14	17	25	22
3486	11S regulator complex subunit alpha;Activator of multicatalytic protease subunit 1;Interferon gamma up-regulated I-5111 protein;Proteasome activator 28 subunit alpha;Proteasome activator complex subunit 1;Putative uncharacterized protein PSME1	32.7839	32.9601	33.0085	33.6705	33.3679	33.4859	33.7705	33.4187	33.8737	+	+	+		21	15	17	15	16	15	17	17	18	17	70.7	70.7	28.723	0	7394800000	8355400000	8640400000	8130200000	13672000000	11085000000	12030000000	1.22623e+10	14653000000	11482000000	15740000000	1.39583e+10	0.663022	0.582462	0.878496	32	39	40	47	37	45
3739	54 kDa nuclear RNA- and DNA-binding protein;55 kDa nuclear protein;DNA-binding p52/p100 complex, 52 kDa subunit;NMT55;Non-POU domain-containing octamer-binding protein;p54(nrb);Putative uncharacterized protein NONO	32.2685	32.0322	31.8475	30.9862	31.1512	30.9474	30.432	30.6465	30.4472	+	+	+		21	17	19	17	15	15	17	15	17	11	55	53.3	54.231	0	5173500000	4392000000	3864200000	4.47657e+09	2127000000	2384700000	2070600000	2194100000	1448600000	1680800000	1463900000	1531100000	2.04027	2.92376	1.43302	34	42	34	20	23	26
3835		32.0495	32.2881	32.0468	31.4534	31.3733	31.6537	31.4117	31.1687	31.2931	+	+	+		21	19	18	15	12	12	14	13	13	13	39	39	82.624	8.2778e-273	4445000000	5244200000	4436500000	4.70857e+09	2940400000	2781600000	3378400000	3.03347e+09	2856700000	2413800000	2631200000	2633900000	1.55221	1.78768	1.1517	38	35	32	22	21	28
5095	Arsenite-resistance protein 2;Serrate RNA effector molecule homolog	29.6643	29.2339	29.4409	28.567	28.6636	28.6693	28.331	28.5253	28.2237	+	+	+		21	11	13	15	7	11	8	7	7	6	27.2	27.2	100.67	6.3599e-127	850840000	631360000	728770000	736990000	397670000	425200000	426890000	4.16587e+08	337670000	386330000	313470000	3.45823e+08	1.76912	2.13112	1.20462	14	15	17	9	12	9
5166	5-3 exoribonuclease 2;DHM1-like protein;cDNA FLJ55645, highly similar to 5-3 exoribonuclease 2 (EC 3.1.11.-)	30.603	30.2233	30.5576	29.4751	29.5315	29.3403	29.4178	29.3981	28.7702	+	+	+		21	15	14	16	11	9	10	8	10	5	30.5	30.5	108.58	1.9531e-192	1630900000	1253500000	1580400000	1.48827e+09	746280000	775990000	679700000	733990000	717220000	707450000	457820000	6.27497e+08	2.02764	2.37175	1.16971	22	17	21	13	9	11
236	HLA-B-associated transcript 3;Large proline-rich protein BAT3;Protein G3;HLA-B associated transcript 3;HLA-B associated transcript 3, isoform CRA_a	29.3348	29.2334	29.4679	30.0448	29.9602	30.133	29.8499	29.8743	29.9506	+	+	+		22	13	15	13	17	14	15	17	17	15	30.6	30.6	122.35	0	677110000	631130000	742540000	6.83593e+08	1107600000	1044500000	1177400000	1.10983e+09	967620000	984150000	1037600000	9.96457e+08	0.615942	0.686024	1.11378	16	20	14	21	20	18
2671	Heterogeneous nuclear ribonucleoprotein L;cDNA FLJ75895, highly similar to Homo sapiens heterogeneous nuclear ribonucleoprotein L (HNRPL), transcript variant 2, mRNA;Putative uncharacterized protein HNRNPL	32.8376	33.0697	32.7775	31.6877	31.8695	31.637	31.8667	31.7949	31.7096	+	+	+		22	15	21	15	11	13	15	14	17	12	66.6	66.6	64.132	0	7675700000	9015300000	7362500000	8.01783e+09	3458900000	3923600000	3339600000	3.57403e+09	3915800000	3725800000	3512000000	3.71787e+09	2.24336	2.15657	0.961313	36	43	35	22	23	25
2770	AIR carboxylase;Multifunctional protein ADE2;Phosphoribosylaminoimidazole carboxylase;Phosphoribosylaminoimidazole-succinocarboxamide synthase;SAICAR synthetase	30.0734	29.9532	30.1654	30.6769	30.613	30.7183	30.6708	30.5921	30.5924	+	+	+		22	12	13	13	15	16	16	15	14	16	57.2	57.2	47.079	0	1129800000	1039500000	1204200000	1124500000	1716600000	1642200000	1766500000	1.70843e+09	1709400000	1618600000	1618900000	1.64897e+09	0.658205	0.681942	1.03606	15	16	20	23	21	26
2774	Heterogeneous nuclear ribonucleoproteins A2/B1	34.8703	35.1331	35.1547	33.5092	34.1302	33.5182	33.3993	33.3417	33.2498	+	+	+		22	21	21	20	16	16	17	16	15	13	62.3	62.3	37.429	0	31405000000	37681000000	38248000000	35778000000	12226000000	18803000000	12302000000	1.44437e+10	11329000000	10886000000	10214000000	1.08097e+10	2.47707	3.30982	1.33618	139	154	168	45	59	45
5038	Adenovirus early region 1B-associated protein 5;E1B-55 kDa-associated protein 5;Heterogeneous nuclear ribonucleoprotein U-like protein 1;cDNA FLJ56481, highly similar to Heterogeneous nuclear ribonucleoprotein U-like protein 1	30.8451	30.7735	30.8168	30.1654	30.1306	29.9175	30.0326	29.8061	29.7828	+	+	+		22	18	19	18	14	14	15	13	13	14	30.5	29.8	95.737	1.1283e-251	1928800000	1835500000	1891400000	1.88523e+09	1204200000	1175500000	1014100000	1.13127e+09	1098300000	938740000	923700000	9.86913e+08	1.66648	1.91023	1.14627	22	25	27	18	15	20
5860	Plakophilin-3	29.8211	29.8998	29.9471	29.056	29.1785	29.1663	29.3848	29.0179	29.4247	+	+	+		22	15	15	16	14	13	12	11	16	16	40.8	40.8	87.081	0	948540000	1001700000	1035100000	9.95113e+08	558120000	607570000	602450000	589380000	701000000	543590000	720630000	6.55073e+08	1.68841	1.51909	0.899716	24	21	22	17	18	18
2103	140 kDa Ser/Arg-rich domain protein;U2-associated protein SR140	29.4255	29.4179	29.2658	28.2816	28.6679	28.2767	28.2645	28.408	27.7893	+	+	+		23	9	16	16	9	7	11	8	8	6	31.2	31.2	118.29	1.1293e-143	721050000	717230000	645480000	6.94587e+08	326290000	426470000	325190000	3.59317e+08	322460000	356180000	231960000	3.03533e+08	1.93308	2.28834	1.18378	11	19	20	9	9	12
2991	Signal transducer and activator of transcription 1-alpha/beta;Transcription factor ISGF-3 components p91/p84	29.2507	28.8549	29.2805	30.0288	30.012	30.4052	29.9108	30.3161	30.2686	+	+	+		23	8	9	10	18	17	20	16	18	15	37.7	37.7	87.334	0	638770000	485490000	652110000	5.92123e+08	1095400000	1082700000	1421900000	1200000000	1009400000	1336800000	1293500000	1.21323e+09	0.493436	0.488054	0.989093	10	11	13	21	21	27
3757	SF3a120;Spliceosome-associated protein 114;Splicing factor 3A subunit 1	32.0091	32.0274	32.0524	31.1171	30.9405	31.1394	30.9046	30.7227	30.9795	+	+	+		23	19	21	16	15	15	13	14	13	13	36.4	36.4	88.885	0	4322100000	4377400000	4453700000	4384400000	2329100000	2060700000	2365300000	2251700000	2010100000	1772000000	2117200000	1.96643e+09	1.94715	2.22962	1.14507	35	40	33	24	23	24
3837	Heterogeneous nuclear ribonucleoprotein U-like protein 2;Scaffold-attachment factor A2	31.9184	31.7555	31.6866	30.7258	30.6759	30.7854	31.0391	30.8252	30.4002	+	+	+		23	13	20	19	11	13	14	12	16	13	32.4	32.4	85.104	0	4058900000	3625400000	3456300000	3.71353e+09	1775800000	1715400000	1850600000	1780600000	2206500000	1902400000	1417000000	1.84197e+09	2.08555	2.01607	0.966684	24	29	31	14	17	21
5762	Basement membrane-associated chondroitin proteoglycan;Chondroitin sulfate proteoglycan 6;Chromosome-associated polypeptide;Structural maintenance of chromosomes protein 3	29.1389	29.0997	28.8378	28.1165	28.0735	28.0098	27.8048	27.5782	27.2272	+	+	+		23	13	15	13	6	4	8	6	7	6	24.7	24.7	141.54	0	591130000	575270000	479770000	5.48723e+08	291020000	282470000	270270000	2.81253e+08	234460000	200390000	157110000	197320000	1.95099	2.78088	1.42537	16	19	13	7	4	8
488	cDNA FLJ53425, highly similar to Far upstream element-binding protein 1;DNA helicase V;Far upstream element-binding protein 1	33.4753	33.6344	33.5393	32.7661	32.9401	32.8321	32.8388	32.6303	32.8176	+	+	+		24	20	22	20	19	20	20	19	19	18	49	48	69.864	0	11942000000	13334000000	12483000000	1.25863e+10	7304500000	8240800000	7646400000	7.73057e+09	7681900000	6648300000	7569600000	7.29993e+09	1.62813	1.72417	1.05899	51	52	55	36	40	41
1160	Pyridoxal-dependent decarboxylase domain-containing protein 1	28.8481	28.8788	28.6862	29.5852	29.2819	29.5999	29.718	29.614	29.87	+	+	+		24	6	9	16	13	14	15	18	21	14	46.1	46.1	86.706	0	483200000	493630000	431910000	469580000	805450000	652710000	813680000	757280000	883110000	821680000	981230000	895340000	0.620088	0.524471	0.845802	7	11	17	13	16	16
2245	Glycine- and tyrosine-rich RNA-binding protein;Heterogeneous nuclear ribonucleoprotein Q;NS1-associated protein 1;Synaptotagmin-binding, cytoplasmic RNA-interacting protein	32.3865	32.6174	32.8556	31.6625	31.8478	31.8202	31.8925	31.7203	31.9079	+	+	+		24	17	21	22	17	18	18	18	21	19	46.9	46.9	69.602	0	5614600000	6588900000	7771600000	6.65837e+09	3399000000	3865000000	3791600000	3685200000	3986600000	3538000000	4029500000	3.85137e+09	1.80679	1.72883	0.956855	40	45	51	31	36	33
2403	LETM1 and EF-hand domain-containing protein 1, mitochondrial;Leucine zipper-EF-hand-containing transmembrane protein 1	30.2485	30.4901	30.2376	29.2321	29.3829	29.4372	29.2987	29.3758	29.5601	+	+	+		24	15	18	17	13	16	15	12	12	13	39.8	39.8	83.353	0	1275600000	1508100000	1266000000	1349900000	630580000	700060000	726910000	685850000	660360000	696610000	791530000	7.16167e+08	1.96821	1.8849	0.957668	21	25	25	14	19	19
2988	Lamina-associated polypeptide 2, isoform alpha;Splenin;Thymopentin;Thymopoietin;Thymopoietin isoform alpha;Thymopoietin-related peptide isoform alpha;TP5	31.659	31.6662	31.7701	31.2027	31.3322	31.2832	30.861	31.0088	31.0001	+	+	+		24	17	20	19	16	16	17	14	17	15	50.6	50.6	75.491	0	3390800000	3407800000	3662300000	3.48697e+09	2471400000	2703500000	2613300000	2.59607e+09	1950300000	2160600000	2147600000	2.08617e+09	1.34317	1.67147	1.24442	27	30	33	23	22	28
3249	Triosephosphate isomerase;Triose-phosphate isomerase	33.938	33.6835	33.8599	34.9716	35.0958	34.9316	35.1176	34.884	34.9772	+	+	+		24	15	16	18	17	18	20	19	21	19	79	79	30.791	0	16457000000	13796000000	15590000000	15281000000	33690000000	36718000000	32768000000	34392000000	37277000000	31706000000	33822000000	3.42683e+10	0.444318	0.445922	1.00361	138	99	110	269	190	154
3532	General transcription factor 3C polypeptide 1;TF3C-alpha;TFIIIC box B-binding subunit;Transcription factor IIIC 220 kDa subunit;Transcription factor IIIC subunit alpha	27.9069	27.9851	27.7844	26.9416	26.5391	27.0746	25.9607	26.5805	26.2462	+	+	+		24	11	17	12	9	8	7	4	6	5	15.2	15.2	238.87	2.6096e-281	251660000	265680000	231180000	2.49507e+08	128890000	97511000	141340000	1.2258e+08	65304000	100350000	79596000	81750000	2.03545	3.05207	1.49945	11	20	14	10	9	8
3831	Phosphoenolpyruvate carboxykinase [GTP], mitochondrial;Phosphoenolpyruvate carboxylase;cDNA FLJ50710, highly similar to Phosphoenolpyruvate carboxykinase (GTP), mitochondrial (EC 4.1.1.32);cDNA, FLJ79105, highly similar to Phosphoenolpyruvate carboxykinase (GTP), mitochondrial (EC 4.1.1.32)	32.3332	32.4988	31.8568	30.8669	31.0107	30.6943	30.8709	30.7335	30.8399	+	+	+		24	23	24	22	19	18	19	19	19	17	45.3	45.3	70.729	0	5410800000	6069100000	3889100000	5123000000	1958300000	2163500000	1737400000	1.95307e+09	1963700000	1785300000	1921900000	1890300000	2.62305	2.71015	1.0332	53	49	52	28	31	31
5313	Protein TANC2;Tetratricopeptide repeat, ankyrin repeat and coiled-coil domain-containing protein 2	27.8937	27.6586	28.2957	29.5232	29.3965	29.6263	28.86	29.048	28.9685	+	+	+		24	11	7	12	17	16	17	13	13	14	17.2	17.2	219.65	7.4342e-209	249360000	211870000	329500000	2.63577e+08	771580000	706670000	828720000	768990000	487220000	555040000	525260000	5.22507e+08	0.342757	0.504447	1.47173	11	6	13	21	18	21
243	70 kDa subunit of Ku antigen;ATP-dependent DNA helicase 2 subunit 1;ATP-dependent DNA helicase II 70 kDa subunit;CTC box-binding factor 75 kDa subunit;DNA repair protein XRCC6;Lupus Ku autoantigen protein p70;Thyroid-lupus autoantigen;X-ray repair complementing defective repair in Chinese hamster cells 6;X-ray repair cross-complementing protein 6;X-ray repair complementing defective repair in Chi…	32.6446	32.563	32.7119	31.9018	31.7374	31.9634	32.165	31.9981	32.064	+	+	+		25	20	22	24	19	19	18	19	18	18	41.2	41.2	69.842	0	6714600000	6344900000	7035200000	6.69823e+09	4012400000	3580200000	4187300000	3.92663e+09	4815300000	4289300000	4489900000	4531500000	1.70585	1.47815	0.86652	56	53	66	43	42	41
325	Heterogeneous nuclear ribonucleoprotein U;p120;pp120;Scaffold attachment factor A;cDNA FLJ44920 fis, clone BRAMY3011501, highly similar to Heterogeneous nuclear ribonucleoprotein U	33.6489	33.59	33.5985	32.1753	32.229	32.3111	32.3644	32.349	32.131	+	+	+		25	25	25	19	19	19	18	18	16	15	34.2	34.2	90.583	0	13469000000	12930000000	13006000000	13135000000	4850000000	5033800000	5328700000	5.07083e+09	5528900000	5470600000	4703200000	5.23423e+09	2.5903	2.50944	0.968782	59	58	58	31	34	34
3043	Glutamine--tRNA ligase;Glutaminyl-tRNA synthetase;cDNA FLJ54314, highly similar to Glutaminyl-tRNA synthetase (EC 6.1.1.18);cDNA FLJ54453, highly similar to Glutaminyl-tRNA synthetase (EC 6.1.1.18)	30.073	29.9631	30.2537	30.6434	30.9113	30.8488	30.8201	30.8871	30.6235	+	+	+		25	12	13	16	18	20	19	17	19	16	37.2	37.2	87.798	4.8503e-261	1129500000	1046600000	1280200000	1152100000	1677200000	2019500000	1933800000	1.87683e+09	1895700000	1985800000	1654200000	1.84523e+09	0.613853	0.624365	1.01713	17	16	21	23	28	26
4672	Far upstream element-binding protein 2;KH type-splicing regulatory protein;p75	32.8657	32.9871	32.951	32.1465	32.3619	32.2038	32.1261	32.1465	32.1071	+	+	+		25	22	25	24	19	20	22	17	21	21	49.8	49.8	73.114	0	7826200000	8513300000	8302900000	8.21413e+09	4753900000	5519400000	4946700000	5.07333e+09	4687400000	4754100000	4625800000	4689100000	1.61908	1.75175	1.08194	48	52	50	35	30	42
2486	p90;T9;Transferrin receptor protein 1;Transferrin receptor protein 1, serum form	30.4882	30.1623	30.4843	31.495	31.5255	31.8747	32.1138	32.0575	32.3636	+	+	+		26	13	12	11	14	18	23	21	21	18	36.3	36.3	84.87	0	1506100000	1201600000	1502100000	1.40327e+09	3026400000	3091200000	3937800000	3351800000	4647400000	4469500000	5526200000	4.88103e+09	0.418661	0.287494	0.686699	22	16	19	25	28	39
2718	6-phosphofructokinase, liver type;Phosphofructo-1-kinase isozyme B;Phosphofructokinase 1;Phosphohexokinase	31.9097	31.3121	31.6712	32.764	32.5335	32.5989	32.7384	32.6804	32.7672	+	+	+		26	14	21	19	19	18	18	21	20	19	52.6	47.9	85.018	0	4034300000	2666100000	3419700000	3.37337e+09	7293600000	6216900000	6505100000	6.67187e+09	7165300000	6882900000	7310000000	7119400000	0.505611	0.473827	0.937139	32	37	34	41	35	39
2759	Citrate hydro-lyase;Cytoplasmic aconitate hydratase;Ferritin repressor protein;Iron regulatory protein 1;Iron-responsive element-binding protein 1;Aconitase 1 variant	29.0082	29.4236	28.9613	30.3343	30.0418	30.1246	30.3036	30.5775	30.6038	+	+	+		26	5	8	6	11	13	17	15	16	13	38.6	38.6	98.398	6.5222e-221	539930000	720080000	522650000	594220000	1353700000	1105300000	1170600000	1.20987e+09	1325200000	1602300000	1631800000	1.51977e+09	0.491145	0.390994	0.796087	7	11	8	15	14	20
195	Putative uncharacterized protein MATR3;Matrin-3	33.5851	33.5489	33.3766	32.3764	32.4585	32.4291	32.3563	32.3014	32.2646	+	+	+		27	20	25	22	19	17	19	19	20	15	40.3	40.3	99.966	0	12886000000	12567000000	11152000000	1.22017e+10	5575100000	5901700000	5782900000	5.75323e+09	5498100000	5293000000	5159600000	5316900000	2.12084	2.29488	1.08207	65	64	65	43	35	45
2100	Beta-III spectrin;Spectrin beta chain, brain 2;Spectrin, non-erythroid beta chain 2	28.6722	29.1016	28.5108	27.604	27.5861	27.7074	27.6757	27.8467	27.6197	+	+	+		27	13	17	13	6	6	7	10	6	9	20.4	18.3	271.32	3.9824e-209	427740000	576030000	382470000	462080000	204000000	201480000	219160000	2.08213e+08	214390000	241380000	206240000	220670000	2.21926	2.09399	0.943551	14	19	15	6	6	7
3513	NOL1/NOP2/Sun domain family member 2;Substrate of AIM1/Aurora kinase B;tRNA (cytosine-5-)-methyltransferase;tRNA (cytosine-5-)-methyltransferase NSUN2;tRNA methyltransferase 4 homolog;cDNA FLJ58246, highly similar to Homo sapiens NOL1/NOP2/Sun domain family, member 2 (NSUN2), mRNA;NOL1/NOP2/Sun domain family, member 2, isoform CRA_a	29.6822	29.9204	29.8534	29.1	29.3483	29.1794	28.8632	28.9079	29.1206	+	+	+		27	18	21	18	17	10	16	16	17	15	45.5	45.5	86.47	4.0247e-266	861430000	1016100000	970010000	949180000	575400000	683450000	607980000	6.22277e+08	488300000	503680000	583670000	5.25217e+08	1.52533	1.80722	1.1848	21	28	24	19	14	17
4187	DEAD box protein 46;Probable ATP-dependent RNA helicase DDX46;PRP5 homolog	29.7101	29.3245	29.4872	28.5715	28.4545	28.7503	28.5223	28.6685	28.5485	+	+	+		27	17	18	20	13	12	14	12	13	10	31	31	117.36	1.5998e-241	878300000	672280000	752540000	7.67707e+08	398910000	367850000	451530000	4.06097e+08	385530000	426650000	392610000	4.01597e+08	1.89045	1.91164	1.01121	20	22	25	15	13	17
5759	300 kDa nuclear matrix antigen;Serine/arginine repetitive matrix protein 2;Serine/arginine-rich splicing factor-related nuclear matrix protein of 300 kDa;Splicing coactivator subunit SRm300;Tax-responsive enhancer element-binding protein 803	29.3095	29.1566	29.1361	28.3285	28.202	28.295	27.3328	27.7182	26.5208	+	+	+		27	19	20	17	11	12	12	7	7	5	13.5	13.5	299.61	0	665350000	598430000	589990000	6.17923e+08	337070000	308770000	329340000	325060000	169040000	220810000	96285000	162045000	1.90095	3.81328	2.00599	23	26	21	15	12	15
406	116 kDa U5 small nuclear ribonucleoprotein component;Elongation factor Tu GTP-binding domain-containing protein 2;SNU114 homolog;U5 snRNP-specific protein, 116 kDa;cDNA FLJ59627, highly similar to 116 kDa U5 small nuclear ribonucleoprotein component;cDNA, FLJ78997, highly similar to 116 kDa U5 small nuclear ribonucleoprotein component	31.3432	31.3113	31.1342	29.8569	29.8525	30.0534	29.7995	30.0721	29.7846	+	+	+		28	22	25	23	20	18	21	19	20	18	41.9	40.8	109.43	0	2724200000	2664700000	2356900000	2.58193e+09	972340000	969380000	1114200000	1018640000	934430000	1128800000	924810000	9.96013e+08	2.53469	2.59227	1.02272	30	34	30	22	22	27
1685	Heat shock protein 75 kDa, mitochondrial;TNFR-associated protein 1;Tumor necrosis factor type 1 receptor-associated protein	31.7858	31.5627	31.3216	30.2291	30.4052	30.4235	30.4167	30.2888	30.3234	+	+	+		28	19	26	26	17	18	20	18	16	17	51	49	80.109	0	3702500000	3171900000	2683700000	3.18603e+09	1258500000	1421900000	1440100000	1373500000	1433300000	1311700000	1343500000	1.36283e+09	2.31965	2.3378	1.00783	37	44	40	22	25	26
2382	Pre-mRNA-processing factor 6;PRP6 homolog;U5 snRNP-associated 102 kDa protein	29.8335	29.7799	29.6552	28.4658	28.8451	28.492	28.4913	28.4629	28.1611	+	+	+		28	15	22	14	8	6	8	7	9	7	36.7	36.7	106.92	4.3505e-244	956730000	921810000	845500000	9.08013e+08	370730000	482200000	377520000	410150000	377340000	370000000	300150000	3.49163e+08	2.21386	2.60054	1.17467	19	27	19	9	7	9
2678	Cytovillin;Ezrin;p81;Villin-2	32.2182	32.0376	31.9124	32.9216	32.7825	32.7938	32.9727	32.8036	32.9764	+	+	+		28	22	23	21	23	24	23	26	27	24	49	49	69.412	0	4996400000	4408300000	4041900000	4482200000	8135400000	7387600000	7445700000	7.65623e+09	8428900000	7496900000	8450800000	8.12553e+09	0.585431	0.551619	0.942244	50	45	46	58	53	57
2750	Lamin-B1	32.2534	32.0717	31.5142	29.6713	29.8095	29.7544	28.6406	28.1147	27.2687	+	+	+		28	21	27	20	11	12	11	7	7	4	44.2	44.2	66.408	0	5119600000	4513800000	3067000000	4.23347e+09	854990000	940910000	905660000	900520000	418470000	290640000	161700000	290270000	4.70114	14.5846	3.10235	41	45	35	14	15	16
3576	56 kDa selenium-binding protein;Selenium-binding protein 1;cDNA FLJ61035, highly similar to Selenium-binding protein 1;Selenium binding protein 1	29.7588	29.9745	30.1227	32.4706	32.2186	32.3105	32.4697	32.1225	32.5349	+	+	+		28	14	17	15	25	21	26	22	23	26	75.8	75.8	52.39	0	908440000	1054900000	1169100000	1.04415e+09	5951600000	4997500000	5326300000	5.42513e+09	5947700000	4675600000	6222700000	5.61533e+09	0.192465	0.185946	0.966128	16	19	18	44	33	47
2213	MYH-1c;Myosin I alpha;Myosin-Ib	30.0788	29.9544	29.7022	28.607	28.686	28.7187	28.8468	28.8203	28.7132	+	+	+		29	19	20	16	10	9	9	9	9	5	36.3	36.3	124.95	0	1134000000	1040300000	873480000	1.01593e+09	408840000	431850000	441770000	4.27487e+08	482780000	474000000	440070000	4.65617e+08	2.37651	2.18189	0.918109	24	24	17	11	10	11
3581	KRAB-associated protein 1;KRAB-interacting protein 1;Nuclear corepressor KAP-1;RING finger protein 96;Transcription intermediary factor 1-beta;Tripartite motif-containing protein 28	33.2103	32.9434	33.0471	32.6021	32.5579	32.5689	32.4706	32.2123	32.3524	+	+	+		29	23	24	24	22	23	22	20	21	21	54.3	54.3	88.549	0	9938000000	8259300000	8875000000	9024100000	6519300000	6322700000	6371300000	6.40443e+09	5951300000	4975800000	5483200000	5470100000	1.40904	1.64971	1.17081	64	56	57	44	45	45
1138	ATP-citrate (pro-S-)-lyase;ATP-citrate synthase;Citrate cleavage enzyme;cDNA FLJ55447, highly similar to ATP-citrate synthase (EC 2.3.3.8)	31.6737	31.3589	31.6491	32.1741	32.2726	32.4448	32.6705	32.4958	32.4119	+	+	+		30	19	24	23	26	23	28	26	24	25	33.2	33.2	126.22	0	3425600000	2754100000	3367700000	3.18247e+09	4845900000	5188300000	5846100000	5.29343e+09	6836100000	6056200000	5714200000	6.20217e+09	0.60121	0.513122	0.853481	28	30	36	43	41	52
2487	Beta-1 metal-binding globulin;Serotransferrin;Siderophilin	23.8033	24.2609	26.0333	32.4164	32.3417	32.1025	33.0829	33.0321	33.3259	+	+	+		30	2	2	5	19	19	18	26	25	23	47.1	47.1	77.063	0	14639000	20103000	68676000	3.44727e+07	5732000000	5442900000	4611300000	5.26207e+09	9098100000	8783100000	10767000000	9549400000	0.00655117	0.00360993	0.551036	2	3	5	37	33	36
3652	Protein LAP4;Protein scribble homolog	29.7189	30.0117	29.8819	29.3115	29.2413	29.3621	29.14	29.364	29.3188	+	+	+		30	17	22	17	13	12	15	17	16	13	29.1	29.1	177.69	1.1659e-258	883680000	1082500000	989370000	9.85183e+08	666260000	634610000	690040000	6.63637e+08	591590000	690930000	669640000	650720000	1.48452	1.51399	1.01985	21	26	23	15	16	19
575	Alpha E-catenin;Cadherin-associated protein;Catenin alpha-1;Renal carcinoma antigen NY-REN-13;cDNA FLJ54047, highly similar to Alpha-1 catenin (Cadherin-associated protein);Catenin (Cadherin-associated protein), alpha 1, 102kDa, isoform CRA_c;CTNNA1 protein	31.3379	31.2248	31.4411	30.5783	30.8531	30.7702	30.8268	30.8091	30.716	+	+	+		31	22	24	23	18	18	16	18	18	19	53.1	53.1	100.07	0	2714200000	2509500000	2915600000	2713100000	1603200000	1939600000	1831300000	1.79137e+09	1904500000	1881300000	1763700000	1.84983e+09	1.51454	1.46667	0.968394	33	39	37	27	30	22
1894	Double-stranded RNA-binding protein 76;Interleukin enhancer-binding factor 3;M-phase phosphoprotein 4;Nuclear factor associated with dsRNA;Nuclear factor of activated T-cells 90 kDa;Translational control protein 80;Putative uncharacterized protein ILF3;cDNA FLJ58801, highly similar to Interleukin enhancer-binding factor 3	32.2304	32.1182	32.2554	31.2513	31.673	31.5017	31.4257	31.3405	31.2277	+	+	+		31	23	28	20	20	14	16	15	17	18	44.4	44.4	95.807	0	5038600000	4661800000	5126800000	4942400000	2556200000	3424000000	3040600000	3.00693e+09	2884500000	2719100000	2514700000	2706100000	1.64367	1.82639	1.11117	47	42	39	29	23	29
2461	Cell proliferation-inducing gene 19 protein;LDH muscle subunit;L-lactate dehydrogenase A chain;Renal carcinoma antigen NY-REN-59;L-lactate dehydrogenase	32.5329	32.3998	32.8038	34.7883	34.609	34.8619	34.8631	34.8342	35.4766	+	+	+		31	16	17	18	20	20	25	22	24	26	82.3	82.3	39.837	0	6213900000	5666300000	7497500000	6.45923e+09	29670000000	26202000000	31224000000	29032000000	31250000000	30629000000	47812000000	3.65637e+10	0.222487	0.176657	0.794012	54	59	60	140	117	142
2780	100 kDa DNA-pairing protein;DNA-binding p52/p100 complex, 100 kDa subunit;Polypyrimidine tract-binding protein-associated-splicing factor;Splicing factor, proline- and glutamine-rich	33.1665	33.1225	33.0584	31.8643	31.7662	31.2136	31.4729	31.1982	30.6193	+	+	+		31	23	27	24	15	16	17	16	15	17	46.8	46.8	76.149	0	9640500000	9351400000	8944700000	9312200000	3909300000	3652500000	2490200000	3.35067e+09	2980400000	2463800000	1649400000	2.36453e+09	2.77921	3.93828	1.41705	62	50	54	23	26	27
2903	Conventional kinesin heavy chain;Kinesin-1 heavy chain;Ubiquitous kinesin heavy chain	29.7968	29.7161	29.7903	30.1279	30.1518	30.3787	30.1891	30.2491	30.0919	+	+	+		31	20	24	19	23	23	23	22	20	21	39.9	39.9	109.68	0	932650000	881920000	928500000	9.14357e+08	1173300000	1192900000	1396000000	1.25407e+09	1224100000	1276100000	1144400000	1.21487e+09	0.729113	0.75264	1.03227	22	26	23	26	30	30
4973	Myb-binding protein 1A	29.836	29.8065	29.8012	28.161	27.7244	28.199	27.9181	28.2539	28.1634	+	+	+		31	23	23	20	17	14	13	14	11	13	30.9	30.9	149.37	2.7295e-287	958340000	938960000	935540000	944280000	300120000	221750000	308140000	276670000	253620000	320080000	300620000	291440000	3.41302	3.24005	0.949321	28	30	29	19	14	13
2483	70 kDa lamin;Lamin-A/C;Renal carcinoma antigen NY-REN-32;Lamin A/C;Progerin	32.9702	33.1003	32.6997	31.3819	31.9396	31.718	30.92	30.2767	29.9629	+	+	+		32	25	28	23	18	17	21	16	16	14	57.5	57.5	74.139	0	8414300000	9208200000	6975600000	8.19937e+09	2798300000	4118900000	3532400000	3483200000	2031700000	1300800000	1046500000	1.45967e+09	2.35398	5.61729	2.3863	59	52	47	28	34	38
2646	86 kDa subunit of Ku antigen;ATP-dependent DNA helicase 2 subunit 2;ATP-dependent DNA helicase II 80 kDa subunit;CTC box-binding factor 85 kDa subunit;DNA repair protein XRCC5;Ku80;Ku86;Lupus Ku autoantigen protein p86;Nuclear factor IV;Thyroid-lupus autoantigen;X-ray repair complementing defective repair in Chinese hamster cells 5 (double-strand-break rejoining);X-ray repair cross-complementing …	32.8492	32.8637	33.0105	32.3296	32.3124	32.4075	32.3115	32.4536	32.3349	+	+	+		32	19	23	24	18	20	23	23	27	22	57.1	57.1	82.704	0	7737400000	7815600000	8652900000	8.06863e+09	5397500000	5333300000	5696800000	5.47587e+09	5330100000	5881900000	5417300000	5543100000	1.47349	1.45562	0.987871	53	43	57	33	40	41
2893	5-aminoimidazole-4-carboxamide ribonucleotide formyltransferase;AICAR transformylase;ATIC;Bifunctional purine biosynthesis protein PURH;IMP cyclohydrolase;IMP synthase;Inosinicase;Phosphoribosylaminoimidazolecarboxamide formyltransferase	32.2465	32.0821	32.2615	32.7385	32.8255	32.8617	33.0017	32.9499	33.0701	+	+	+		33	22	25	22	25	26	27	28	30	26	66.9	66.9	64.615	0	5095400000	4546500000	5148500000	4.93013e+09	7166100000	7611100000	7804500000	7.52723e+09	8600300000	8296900000	9017700000	8638300000	0.654973	0.57073	0.871379	49	56	58	63	57	61
3443	6-phosphofructokinase type C;6-phosphofructokinase, platelet type;Phosphofructo-1-kinase isozyme C;Phosphofructokinase 1;Phosphohexokinase;Phosphofructokinase, platelet	32.3025	32.0395	32.2726	33.2724	32.9314	33.1292	33.2868	33.277	33.5007	+	+	+		33	24	28	29	28	29	32	29	30	29	48.9	48.9	85.595	0	5297000000	4414300000	5188200000	4966500000	10375000000	8191300000	9394800000	9.32037e+09	10479000000	10408000000	12154000000	1.10137e+10	0.532865	0.45094	0.846255	45	46	59	63	62	70
5569	180 kDa ribosome receptor homolog;ES/130-related protein;Ribosome receptor protein;Ribosome-binding protein 1	30.2802	30.0941	29.9916	30.9125	30.9375	30.8163	30.637	30.5609	30.5131	+	+	+		33	17	23	15	24	19	22	28	22	23	28.7	28.7	152.47	0	1303900000	1146100000	1067500000	1172500000	2021100000	2056500000	1890700000	1.98943e+09	1669800000	1584000000	1532400000	1595400000	0.589364	0.734925	1.24698	25	33	20	34	29	28
367	Brain form hexokinase;Hexokinase type I;Hexokinase-1;cDNA FLJ56506, highly similar to Hexokinase-1 (EC 2.7.1.1)	30.44	30.3772	30.3819	30.8514	30.7745	30.6766	30.834	30.9964	30.7811	+	+	+		34	18	23	24	20	18	24	24	23	23	41.7	41.7	102.48	0	1456600000	1394600000	1399100000	1.41677e+09	1937300000	1836700000	1716300000	1830100000	1914100000	2142100000	1845200000	1.96713e+09	0.774147	0.720219	0.930339	23	28	31	30	27	34
2563	Heat shock 84 kDa;Heat shock protein HSP 90-beta	33.5709	33.3001	33.4188	33.9238	34.0996	34.1064	34.3271	34.1294	33.9071	+	+	+		34	22	23	21	22	25	30	23	26	24	64.1	45.2	83.263	0	12760000000	10576000000	11483000000	1.16063e+10	16296000000	18408000000	18495000000	17733000000	21552000000	18792000000	16108000000	1.88173e+10	0.654505	0.616789	0.942376	69	60	54	57	62	66
2592	NAD(+) ADP-ribosyltransferase 1;Poly [ADP-ribose] polymerase 1;Poly[ADP-ribose] synthase 1	31.125	31.0253	30.6383	29.8804	29.8784	29.8972	30.0926	29.9814	29.9154	+	+	+		34	22	25	23	17	13	18	15	13	17	46.9	46.9	113.08	0	2341800000	2185500000	1671300000	2066200000	988310000	986960000	999880000	9.91717e+08	1144900000	1060000000	1012600000	1072500000	2.08346	1.92653	0.924678	32	35	29	24	16	21
3117	Dynamin-2;cDNA FLJ78533, highly similar to Homo sapiens dynamin 2 (DNM2), transcript variant 4, mRNA	30.2342	29.9586	30.0666	31.0709	31.0694	31.3132	31.7383	31.8144	32.0091	+	+	+		35	13	21	19	21	20	22	26	28	27	47.4	47.4	98.063	0	1263000000	1043400000	1124500000	1.14363e+09	2255700000	2253300000	2668200000	2392400000	3582400000	3776500000	4322000000	3.89363e+09	0.478028	0.293719	0.614439	19	27	24	25	31	36
5509	UDP--Glc:glycoprotein glucosyltransferase;UDP-glucose ceramide glucosyltransferase-like 1;UDP-glucose:glycoprotein glucosyltransferase 1	30.7549	30.7083	30.7803	30.4733	30.5628	30.5769	30.3774	30.5384	30.4213	+	+	+		36	21	28	24	21	23	21	20	22	22	34.3	34.3	177.19	0	1812000000	1754400000	1844200000	1.80353e+09	1490700000	1586100000	1601600000	1.55947e+09	1394800000	1559500000	1437900000	1.46407e+09	1.15651	1.23187	1.06516	28	37	33	27	32	28
2324	Pre-mRNA-splicing factor SF3b 155 kDa subunit;Spliceosome-associated protein 155;Splicing factor 3B subunit 1	32.0414	31.6085	31.5638	30.5505	30.7954	30.903	30.5606	30.7301	30.7898	+	+	+		37	31	31	25	19	18	18	16	17	13	38.4	38.4	145.83	0	4419900000	3274300000	3174400000	3.62287e+09	1572600000	1863500000	2007900000	1.81467e+09	1583600000	1781100000	1856300000	1.74033e+09	1.99644	2.08171	1.04271	41	47	38	24	24	24
2506	Glyceraldehyde-3-phosphate dehydrogenase	34.3942	34.855	34.821	36.2075	36.2741	36.3162	36.547	36.5911	36.4181	+	+	+		37	22	23	26	28	27	32	27	33	34	93.1	93.1	36.053	0	22578000000	31075000000	30350000000	28001000000	79347000000	83099000000	85556000000	8.26673e+10	100400000000	103520000000	91819000000	9.85797e+10	0.338719	0.284044	0.838584	398	338	562	839	768	876
2535	Autocrine motility factor;Glucose-6-phosphate isomerase;Neuroleukin;Phosphoglucose isomerase;Phosphohexose isomerase;Sperm antigen 36	33.33	32.9751	33.2789	34.8509	34.6544	34.8137	34.9086	34.7588	34.884	+	+	+		37	17	21	20	26	25	29	25	30	27	68.5	68.5	63.146	0	10798000000	8443000000	10422000000	9.88767e+09	30986000000	27041000000	30198000000	2.94083e+10	32250000000	29070000000	31705000000	3.10083e+10	0.33622	0.318871	0.948401	55	51	75	112	92	129
2533	2-phospho-D-glycerate hydro-lyase;Alpha-enolase;C-myc promoter-binding protein;Enolase 1;MBP-1;MPB-1;Non-neural enolase;Phosphopyruvate hydratase;Plasminogen-binding protein	35.3698	35.0949	35.4898	36.7088	36.8296	36.5885	36.8192	36.7975	36.5035	+	+	+		38	22	27	23	29	28	32	30	32	30	75.6	75.6	47.168	0	44398000000	36695000000	48249000000	43114000000	112320000000	122130000000	103330000000	1.12593e+11	121250000000	119440000000	97421000000	1.12704e+11	0.382918	0.382543	0.999021	309	379	398	1092	802	738
2623	Glycogen phosphorylase, brain form	31.0942	30.9979	31.0779	31.763	31.5459	31.7171	31.9459	31.805	32.0735	+	+	+		38	23	23	20	27	21	26	27	31	28	51.8	51.8	96.695	0	2292400000	2144400000	2266600000	2.23447e+09	3644300000	3135100000	3530100000	3436500000	4136900000	3752000000	4519400000	4136100000	0.650216	0.540235	0.830855	34	31	27	42	31	37
2497	Fructose-bisphosphate aldolase A;Lung cancer antigen NY-LU-1;Muscle-type aldolase	34.994	34.7951	34.7169	36.5662	36.2521	36.2636	36.5128	36.827	36.9021	+	+	+		39	22	25	24	31	32	34	33	34	34	93.7	93.7	39.42	0	34218000000	29810000000	28237000000	30755000000	101750000000	81843000000	82493000000	8.86953e+10	98050000000	121910000000	128420000000	1.16127e+11	0.346749	0.26484	0.763781	274	274	302	899	682	676
3154	Heterogeneous nuclear ribonucleoprotein M;Heterogeneous nuclear ribonucleoprotein M isoform a variant	33.3489	33.1485	33.2439	32.1793	32.3967	32.251	32.15	32.0939	31.9871	+	+	+		39	31	34	30	24	25	27	27	29	23	66.7	66.7	77.515	0	10940000000	9521100000	10172000000	1.0211e+10	4863500000	5654500000	5111200000	5.20973e+09	4765700000	4583800000	4256700000	4535400000	1.95999	2.25141	1.14868	88	94	109	51	45	57
3209	15S Mg(2+)-ATPase p97 subunit;Transitional endoplasmic reticulum ATPase;Valosin-containing protein	33.4552	33.4679	33.4655	33.8142	33.8472	34.0003	34.0839	33.8758	33.9577	+	+	+		39	29	31	27	28	27	28	29	31	29	60.4	60.4	89.321	0	11777000000	11881000000	11861000000	1.18397e+10	15104000000	15453000000	17183000000	1.59133e+10	18209000000	15763000000	16683000000	16885000000	0.744009	0.701194	0.942454	62	68	70	69	65	72
2469	Cell migration-inducing gene 10 protein;Phosphoglycerate kinase 1;Primer recognition protein 2;Phosphoglycerate kinase	33.3763	33.6928	34.2564	35.7321	35.5695	35.4639	35.7715	35.6917	35.9459	+	+	+		40	23	26	26	30	32	34	36	33	34	85.9	85.9	44.614	0	11150000000	13885000000	20521000000	1.51853e+10	57075000000	50990000000	47393000000	5.18193e+10	58652000000	55497000000	66188000000	6.01123e+10	0.293044	0.252616	0.862042	134	88	131	252	250	253
2664	Cytosolic thyroid hormone-binding protein;Opa-interacting protein 3;p58;Pyruvate kinase 2/3;Pyruvate kinase isozymes M1/M2;Pyruvate kinase muscle isozyme;Thyroid hormone-binding protein 1;Tumor M2-PK;Pyruvate kinase	34.9379	34.9502	35.2774	36.3933	36.3844	36.5404	36.56	36.5016	36.6501	+	+	+		44	28	36	33	37	37	40	38	40	41	73.8	73.8	57.936	0	32912000000	33193000000	41645000000	3.59167e+10	90258000000	89702000000	99942000000	9.33007e+10	101310000000	97289000000	107840000000	1.02146e+11	0.384956	0.35162	0.913402	212	159	145	524	439	466
1762	Fer-1-like protein 3;Myoferlin;Putative uncharacterized protein MYOF	30.6321	30.4247	30.7385	29.5198	29.3441	29.4451	29.5555	29.7161	29.8318	+	+	+		46	36	34	37	19	17	16	16	22	16	29.1	29.1	234.65	0	1664100000	1441300000	1791500000	1632300000	769760000	681500000	730910000	727390000	789030000	881930000	955550000	8.75503e+08	2.24405	1.86441	0.830825	43	40	47	21	18	18
2652	Elongation factor 2;cDNA FLJ56548, highly similar to Elongation factor 2	33.7161	33.713	33.7972	34.1936	34.3812	34.5216	34.4957	34.3999	34.4213	+	+	+		51	32	37	35	35	36	41	38	45	40	62.4	62.4	95.337	0	14111000000	14081000000	14927000000	14373000000	19647000000	22375000000	24662000000	22228000000	24223000000	22668000000	23007000000	2.32993e+10	0.646617	0.616885	0.954019	82	97	84	91	104	115
2641	Nucleoprotein TPR	31.2199	31.5432	31.1605	30.3368	30.5897	30.6301	30.4495	30.4423	30.5059	+	+	+		53	34	44	33	25	21	29	24	31	25	31.6	31.6	267.29	0	2501100000	3129400000	2400100000	2.67687e+09	1356100000	1615900000	1661800000	1544600000	1466300000	1459000000	1524700000	1.48333e+09	1.73305	1.80463	1.0413	44	57	41	32	23	35
3430	Beta-II spectrin;Fodrin beta chain;Spectrin beta chain, brain 1;Spectrin, non-erythroid beta chain 1	30.8994	30.9738	31.1492	29.5413	29.8134	30.1988	29.493	29.7946	29.4724	+	+	+		53	37	38	35	21	24	22	21	18	12	32	32	274.61	0	2002800000	2108800000	2381400000	2.16433e+09	781300000	943450000	1232400000	9.85717e+08	755590000	931220000	744870000	810560000	2.1957	2.67017	1.21609	43	43	47	22	28	28
4097	220 kDa U5 snRNP-specific protein;p220;Pre-mRNA-processing-splicing factor 8;PRP8 homolog;Splicing factor Prp8	31.8677	31.3549	31.6871	30.5541	30.3235	30.4127	30.2587	30.1695	30.3644	+	+	+		64	52	46	49	30	30	36	23	29	27	37.3	37.3	273.6	0	3918700000	2746400000	3457500000	3374200000	1576500000	1343600000	1429300000	1449800000	1284600000	1207600000	1382300000	1291500000	2.32736	2.61262	1.12257	75	57	69	38	36	38
2332	Activating signal cointegrator 1 complex subunit 3-like 1;BRR2 homolog;U5 small nuclear ribonucleoprotein 200 kDa helicase;U5 snRNP-specific 200 kDa protein	32.3774	32.153	32.179	30.8886	30.7994	31.1136	30.8234	31.1103	30.9483	+	+	+		68	53	55	54	34	40	38	33	34	30	42.5	42.5	244.5	0	5579100000	4775500000	4862200000	5.07227e+09	1987900000	1868700000	2323500000	2.06003e+09	1900000000	2318100000	2071900000	2.09667e+09	2.46223	2.41921	0.982528	73	80	78	45	45	49
3003	130 kDa leucine-rich protein;GP130;Leucine-rich PPR motif-containing protein, mitochondrial	33.0168	33.0278	32.6452	31.132	31.3369	31.4031	31.3125	31.1846	31.0922	+	+	+		73	57	62	59	37	38	45	38	42	39	59.4	59.4	157.9	0	8690800000	8757100000	6717300000	8.05507e+09	2353300000	2712400000	2839700000	2.63513e+09	2666900000	2440600000	2289200000	2.46557e+09	3.0568	3.26702	1.06877	106	97	99	49	55	61
3628		31.8218	31.9039	32.1557	30.463	30.8197	30.9121	30.6672	30.5074	30.3012	+	+	+		76	59	57	58	26	31	33	26	32	22	37.6	37.6	285.09	0	3796000000	4018200000	4784500000	4.19957e+09	1480100000	1895200000	2020500000	1798600000	1705100000	1526300000	1323000000	1.51813e+09	2.33491	2.76627	1.18474	80	87	86	33	36	42
3378	DNA-dependent protein kinase catalytic subunit;DNPK1;p460	32.0193	31.9356	31.3676	29.9609	29.6822	30.1902	29.9487	30.0317	29.5373	+	+	+		97	78	78	68	36	31	32	30	29	19	29.3	29.3	469.08	0	4352900000	4107500000	2770600000	3.74367e+09	1045000000	861480000	1225100000	1043860000	1036200000	1097600000	779160000	9.70987e+08	3.58637	3.85553	1.07505	103	105	88	41	35	37
3072	[Acyl-carrier-protein] S-acetyltransferase;[Acyl-carrier-protein] S-malonyltransferase;3-hydroxypalmitoyl-[acyl-carrier-protein] dehydratase;3-oxoacyl-[acyl-carrier-protein] reductase;3-oxoacyl-[acyl-carrier-protein] synthase;Enoyl-[acyl-carrier-protein] reductase;Fatty acid synthase;Oleoyl-[acyl-carrier-protein] hydrolase	35.3102	35.2109	35.3934	36.2928	36.326	36.6422	36.7152	36.5768	36.6087	+	+	+		112	79	89	85	88	89	96	95	97	98	59.9	59.9	273.42	0	42602000000	39767000000	45132000000	4.25003e+10	84184000000	86141000000	107250000000	92525000000	112820000000	102500000000	104790000000	1.06703e+11	0.459339	0.398304	0.867124	194	172	199	255	224	283
2505	Tubulin 5 beta;Tubulin beta-4 chain;cDNA FLJ53341, highly similar to Tubulin beta-4 chain;cDNA FLJ52536, highly similar to Tubulin beta-4 chain	28.6963	28.5974	28.7208	29.2369	29.3217	29.8291	29.5577	29.6581	29.7281	+		+		2	2	2	2	2	2	2	2	2	2	65.5	7.9	49.585	0	434960000	406130000	442420000	4.27837e+08	632670000	670960000	953810000	752480000	790220000	847200000	889330000	842250000	0.568569	0.507969	0.893416	8	8	12	10	10	11
4990	Protein LAPS18-like;Protein LLP homolog	28.7035	29.2657	29.0992	17.3499	26.834	26.7755	16.2662	16.7193	17.0176	+		+		2	2	2	2	1	2	2	1	1	1	23.3	23.3	15.225	4.4699e-46	437120000	645420000	575070000	5.52537e+08	0	119630000	114880000	78170000	0	0	0	0	7.0684	5.52537e+08	78170001	4	4	4	2	3	3
1667	Beta-2-microglobulin;Beta-2-microglobulin form pI 5.3	25.7413	26.5117	26.2721	28.549	28.1019	27.1874	28.3274	27.4249	27.8577	+		+		3	3	2	2	3	3	2	2	3	3	28.7	28.7	13.972	1.7543e-13	56094000	95681000	81037000	77604000	392730000	288090000	152840000	2.77887e+08	336820000	180180000	243220000	2.53407e+08	0.279265	0.306243	1.0966	4	2	2	5	5	3
1752	FYVE, RhoGEF and PH domain-containing protein 3;Zinc finger FYVE domain-containing protein 5	25.5003	25.0073	24.866	23.27	16.9133	18.2778	18.2859	17.5603	16.3331	+		+		3	2	2	3	2	1	0	1	1	1	7	7	79.4	6.5226e-07	47463000	33724000	30578000	37255000	10115000	0	0	3.37167e+06	0	0	0	0	11.0494	37255001	3.37167e+06	3	2	3	2	1	0
3791	Adipose most abundant gene transcript 2 protein	15.5297	17.6991	17.2341	16.4793	25.9439	17.3004	28.1082	28.6001	27.9661	+		+		3	1	1	1	1	2	1	2	2	3	69.7	69.7	7.8547	1.7312e-44	0	0	0	0	0	64547000	0	2.15157e+07	289340000	406890000	262210000	319480000	4.64778e-08	3.13009e-09	0.0673459	1	1	1	2	3	2
4813	Asparagine--tRNA ligase;Probable asparaginyl-tRNA synthetase, mitochondrial	27.0699	27.4469	27.482	15.7863	25.343	18.5431	15.7059	16.2257	17.0609	+		+		3	2	3	2	0	2	1	0	0	1	7.1	7.1	54.089	4.8585e-08	140880000	182950000	187460000	170430000	0	42561000	0	14187000	0	0	0	0	12.0131	170430001	14187001	3	3	3	0	2	1
4914	Stromal cell-derived factor 2	28.5579	28.3624	28.5499	28.9575	29.2472	28.8219	29.1232	29.1226	29.3555	+		+		3	3	3	3	2	3	3	3	3	3	24.6	24.6	23.026	1.1833e-128	395170000	345100000	392990000	3.77753e+08	521300000	637230000	474510000	5.44347e+08	584730000	584480000	686870000	6.18693e+08	0.693957	0.610566	0.879833	5	5	5	4	5	5
5515	CDGSH iron sulfur domain-containing protein 1;MitoNEET	28.5464	28.5829	28.385	28.5355	28.6557	28.3478	28.1734	27.9071	27.976	+		+		3	3	3	3	3	3	3	3	3	3	35.2	35.2	12.199	3.2788e-72	392040000	402090000	350530000	3.81553e+08	389070000	422890000	341610000	3.84523e+08	302710000	251690000	264000000	272800000	0.992276	1.39866	1.40954	4	4	4	5	5	5
152	Putative uncharacterized protein LCMT1;Leucine carboxyl methyltransferase 1;Protein-leucine O-methyltransferase	26.2396	26.1364	25.9438	26.5156	26.4854	26.6409	26.6081	26.7729	27.0313	+		+		4	2	4	3	4	4	4	3	2	4	16.8	16.8	41.105	2.5991e-28	79232000	73761000	64543000	72512000	95939000	93953000	104640000	9.81773e+07	102290000	114670000	137160000	118040000	0.738582	0.6143	0.831729	2	4	3	5	4	5
1098	Elongin 15 kDa subunit;Elongin-C;RNA polymerase II transcription factor SIII subunit C;SIII p15;Transcription elongation factor B polypeptide 1	28.5411	28.3962	28.5329	28.9583	28.679	29.1385	29.1636	29.1586	29.1554	+		+		4	4	4	4	4	3	4	4	4	4	48.2	48.2	12.473	2.6706e-123	390590000	353280000	388380000	3.77417e+08	521580000	429780000	590950000	5.14103e+08	601330000	599240000	597930000	599500000	0.734126	0.629552	0.857554	5	5	5	5	3	5
5217	140 kDa nuclear and cell adhesion-related phosphoprotein;Desmosome-associated protein;Domain-rich serine protein;Melanoma metastasis clone A protein;Nuclear protein SDK3;Pinin;SR-like protein	27.3785	28.1456	28.0246	27.273	27.2293	27.4597	26.6118	26.4633	26.6429	+		+		4	4	4	4	3	4	4	3	3	3	7.5	7.5	81.613	1.4238e-35	174480000	296950000	273060000	2.48163e+08	162180000	157340000	184580000	1.68033e+08	102550000	92522000	104790000	99954000	1.47687	2.48278	1.68111	4	5	5	3	5	5
5220	BolA-like protein 2	29.0228	29.1404	29.1489	29.5033	30.0014	30.1425	30.2477	30.3004	30.754	+		+		4	3	3	3	3	3	3	3	3	3	55.8	55.8	10.116	1.9308e-17	545410000	591760000	595250000	5.77473e+08	761010000	1074800000	1185200000	1.007e+09	1274900000	1322300000	1810800000	1.46933e+09	0.573457	0.393017	0.685347	5	6	8	7	6	8
432	85 kDa nucleoporin;FROUNT;Nuclear pore complex protein Nup85;Nucleoporin Nup75;Nucleoporin Nup85;Pericentrin-1;cDNA FLJ53138, highly similar to Homo sapiens pericentrin 1 (PCNT1), mRNA;cDNA FLJ59373, highly similar to Homo sapiens pericentrin 1 (PCNT1), mRNA	27.0356	26.3522	26.3622	25.9662	25.5529	25.4343	25.3038	25.1649	25.3375	+		+		5	5	5	4	4	2	4	4	2	2	12	12	75.019	7.5448e-144	137570000	85667000	86259000	1.03165e+08	65554000	49224000	45341000	53373000	41418000	37617000	42397000	4.04773e+07	1.93291	2.54872	1.31859	8	8	6	7	3	7
637	Kinesin-like DNA-binding protein;Kinesin-like protein 4;Kinesin-like protein KIF22;cDNA FLJ53835, highly similar to Kinesin-like protein KIF22;cDNA, FLJ79288, highly similar to Kinesin-like protein KIF22;Kinesin family member 22, isoform CRA_b	26.1989	26.5829	25.9552	25.4028	25.5687	25.5354	25.2791	25.0397	25.3234	+		+		5	3	3	2	2	2	3	3	3	5	14	14	73.261	2.2891e-35	77029000	100520000	65055000	80868000	44361000	49769000	48631000	47587000	40717000	34491000	41987000	39065000	1.69937	2.07009	1.21815	3	3	3	2	2	3
1335	E74-like factor 1;ETS-related transcription factor Elf-1	26.7487	26.8435	26.6498	25.7414	26.2898	26.1969	25.2622	25.6196	25.7756	+		+		5	5	5	3	3	4	3	2	3	3	15.3	15.3	67.497	4.9939e-94	112760000	120420000	105290000	1.12823e+08	56097000	82039000	76923000	7.16863e+07	40243000	51554000	57441000	49746000	1.57385	2.26799	1.44105	6	5	3	3	4	3
1358	Golgi phosphoprotein 3-like;GPP34-related protein	15.6177	15.4792	16.7914	24.9574	17.7525	25.2623	24.8571	25.6746	25.8906	+		+		5	1	1	1	2	1	3	2	2	4	41.7	37.5	35.258	2.8938e-106	0	0	0	0	32578000	0	40244000	24274000	30390000	53557000	62208000	4.87183e+07	4.11963e-08	2.05262e-08	0.498252	1	1	1	2	1	3
1370	EPH-like kinase 8;Ephrin type-A receptor 4;Tyrosine-protein kinase receptor SEK;Tyrosine-protein kinase TYRO1	26.4095	26.9312	25.2208	17.2378	23.1452	16.7373	17.0712	16.0091	17.2588	+		+		5	4	3	4	1	2	1	1	1	1	10.1	9	109.86	1.9257e-38	89136000	127970000	39104000	8.54033e+07	0	9276500	0	3.09217e+06	0	0	0	0	27.6192	8.54033e+07	3.09217e+06	4	3	5	1	2	1
1868	Serine/threonine-protein phosphatase 4 regulatory subunit 3A;SMEK homolog 1	25.4918	25.3541	25.7736	25.4342	25.158	25.1047	24.7178	24.7649	24.8833	+		+		5	3	2	4	3	3	2	4	3	3	9.7	9.7	95.367	9.8875e-55	47185000	42890000	57361000	4.91453e+07	45338000	37439000	36081000	3.96193e+07	27593000	28509000	30947000	2.90163e+07	1.24044	1.69371	1.36541	3	3	6	5	4	3
3118	Bis(5-nucleosyl)-tetraphosphatase [asymmetrical];Diadenosine 5,5-P1,P4-tetraphosphate asymmetrical hydrolase;Nucleoside diphosphate-linked moiety X motif 2	27.3806	27.8669	27.3205	28.4215	28.3064	28.195	28.4951	28.4187	28.6885	+		+		5	4	3	3	4	5	5	4	4	4	53.1	53.1	16.829	1.2459e-36	174740000	244780000	167600000	1.95707e+08	359520000	331960000	307290000	3.32923e+08	378330000	358820000	432620000	3.89923e+08	0.587843	0.501911	0.853817	6	5	4	7	6	6
3239	Component of gems 4;Gemin-4;p97	26.1873	25.9721	26.0935	24.8732	23.8846	24.9241	24.8984	25.3605	25.1071	+		+		5	2	3	3	2	3	2	2	2	3	6.6	6.6	120.04	1.0873e-13	76413000	65824000	71601000	7.12793e+07	30731000	15487000	31834000	2.60173e+07	31272000	43081000	36140000	36831000	2.73969	1.93531	0.706398	3	4	5	2	3	3
4737	FLYWCH family member 2	30.3455	29.8337	29.9495	29.4478	29.3363	29.0222	29.3583	28.9302	29.037	+		+		5	5	5	5	5	5	4	5	5	4	40	40	14.563	1.7186e-32	1364300000	956870000	1036800000	1.11932e+09	732270000	677810000	545210000	6.51763e+08	688230000	511510000	550820000	583520000	1.71738	1.91823	1.11695	7	9	7	5	6	6
4848	Bcl10-interacting CARD protein	27.4482	27.0571	25.6432	16.2521	16.8629	24.3641	16.4569	16.4155	17.2887	+		+		5	2	4	5	1	1	2	0	1	0	30.1	30.1	20.625	4.3105e-08	183120000	139640000	52406000	1.25055e+08	0	0	21594000	7198000	0	0	0	0	17.3736	1.25055e+08	7198001	2	4	5	1	1	2
5009	CTG repeat protein 4a;Expanded repeat-domain protein CAG/CTG 5;Protein associated with TLR4;Protein canopy homolog 3;Trinucleotide repeat-containing gene 5 protein	29.1698	29.4052	29.6404	30.91	30.7437	30.1279	31.0413	30.5998	30.3264	+		+		5	5	5	4	5	5	4	5	5	5	22.3	22.3	30.748	4.8716e-118	603910000	710970000	836840000	717240000	2017600000	1798000000	1173300000	1.66297e+09	2209900000	1627300000	1346300000	1.72783e+09	0.431301	0.415109	0.962458	8	8	6	10	9	7
5594	PEP11 homolog;Vacuolar protein sorting-associated protein 29;Vesicle protein sorting 29	29.6603	29.6839	29.9273	30.1331	30.165	30.1954	30.2606	30.3736	30.2491	+		+		5	3	3	4	3	4	4	4	5	4	33	33	20.505	2.5585e-42	848470000	862470000	1021000000	9.10647e+08	1177500000	1203800000	1229500000	1203600000	1286300000	1391100000	1276100000	1.31783e+09	0.756602	0.691018	0.913317	7	6	8	5	7	6
244	NHP2 non-histone chromosome protein 2-like 1 (S. cerevisiae);High mobility group-like nuclear protein 2 homolog 1;NHP2-like protein 1;OTK27;SNU13 homolog;U4/U6.U5 tri-snRNP 15.5 kDa protein	31.529	31.9972	31.8824	28.9257	28.7656	30.645	29.0267	29.3782	29.3035	+		+		6	4	6	5	4	3	3	4	4	4	54.5	54.5	14.627	4.6354e-121	3098600000	4286500000	3958700000	3.78127e+09	509920000	456350000	1679000000	8.81757e+08	546890000	697800000	662580000	6.35757e+08	4.28833	5.94766	1.38694	9	12	13	5	4	5
877	Cytochrome c;Putative uncharacterized protein CYCS	30.6504	31.1971	31.0098	31.6759	31.8564	31.3122	31.8069	31.8778	32.0137	+		+		6	6	6	6	6	6	6	6	6	6	55.2	55.2	11.749	8.1368e-156	1685400000	2461900000	2162100000	2.10313e+09	3430700000	3888000000	2666400000	3.32837e+09	3756800000	3946200000	4335900000	4.01297e+09	0.631882	0.524084	0.829403	15	21	19	19	19	22
1281	Ally of AML-1 and LEF-1;bZIP-enhancing factor BEF;THO complex subunit 4;Transcriptional coactivator Aly/REF	31.4495	31.7144	31.9254	30.5348	31.0724	30.4943	30.1783	30.0168	30.8201	+		+		6	5	5	6	5	5	5	5	5	5	33.7	33.7	27.557	8.902e-207	2932600000	3523700000	4078400000	3.51157e+09	1555600000	2258000000	1512500000	1.77537e+09	1215000000	1086300000	1895700000	1399000000	1.97794	2.51005	1.26903	16	15	16	11	11	10
1681	Coat protein GPP34;Golgi phosphoprotein 3;Mitochondrial DNA absence factor	27.8927	28.1525	28.2775	28.701	28.5163	28.7921	28.8581	29.0232	28.9332	+		+		6	3	5	5	4	4	5	4	5	4	32.6	32.6	33.81	2.536e-168	249200000	298370000	325370000	290980000	436370000	383940000	464830000	428380000	486590000	545580000	512560000	514910000	0.679257	0.565108	0.831951	7	9	11	8	6	8
2571	40S ribosomal protein S17	30.8866	31.1628	31.0405	31.4166	31.5145	31.309	31.3963	31.5868	31.5185	+		+		6	6	6	6	6	5	6	6	5	5	33.3	33.3	15.55	6.3784e-125	1985100000	2404000000	2208700000	2.19927e+09	2866400000	3067700000	2660400000	2.86483e+09	2826300000	3225400000	3076200000	3.04263e+09	0.767677	0.722817	0.941564	17	19	17	16	18	17
3229	B(2)GCN homolog;B4 integrin interactor;CAB;Eukaryotic translation initiation factor 6;p27(BBP)	29.6218	29.6107	29.5947	29.1678	29.0303	29.3212	29.3469	29.4511	29.3428	+		+		6	5	5	6	6	4	6	6	5	5	46.9	46.9	26.599	2.5407e-147	826130000	819790000	810770000	8.18897e+08	603070000	548260000	670760000	6.07363e+08	682800000	733950000	680860000	6.99203e+08	1.34828	1.17119	0.868651	9	8	9	8	6	8
3423	Purine-rich single-stranded DNA-binding protein alpha;Transcriptional activator protein Pur-alpha	26.8406	27.1359	27.1472	27.3996	27.4539	27.5582	27.7225	27.5286	27.7008	+		+		6	4	3	4	4	5	4	4	4	4	18.3	18.3	34.91	1.5448e-113	120180000	147480000	148640000	1.38767e+08	177050000	183840000	197620000	186170000	221470000	193610000	218160000	211080000	0.745376	0.657413	0.881988	7	6	6	7	7	8
3580	Pre-mRNA-splicing factor SRP55;Splicing factor, arginine/serine-rich 6	29.3946	28.9525	29.3581	28.2687	28.8996	28.5639	28.4516	27.9047	28.006	+		+		6	6	6	6	6	6	4	4	5	3	16.6	16.6	39.586	3.3098e-33	705780000	519490000	688130000	637800000	323400000	500780000	396820000	407000000	367110000	251280000	269560000	2.95983e+08	1.56708	2.15485	1.37508	8	9	10	6	9	5
3699	140 kDa nucleolar phosphoprotein;Hepatitis C virus NS5A-transactivated protein 13;Nucleolar 130 kDa protein;Nucleolar and coiled-body phosphoprotein 1;Nucleolar phosphoprotein p130	27.6566	26.7695	26.2402	25.1696	24.3477	24.288	24.2528	24.6374	23.8407	+		+		6	2	3	5	2	3	3	2	4	2	9.2	9.2	74.746	1.0792e-53	211580000	114400000	79264000	1.35081e+08	37740000	21350000	20484000	2.65247e+07	19990000	26097000	15023000	20370000	5.09267	6.63139	1.30214	10	8	11	6	6	8
4828	Zinc finger protein 828	26.858	27.472	26.6323	26.1691	26.0156	25.7417	25.6687	25.3022	25.2932	+		+		6	6	4	5	4	4	3	3	3	2	8.9	8.9	89.098	5.645e-48	121640000	186170000	104020000	1.37277e+08	75452000	67836000	56109000	6.64657e+07	53339000	41373000	41115000	4.52757e+07	2.06538	3.03202	1.46802	6	6	6	4	4	3
4954	EEN fusion partner of MLL;Endophilin-2;Endophilin-A2;Extra eleven-nineteen leukemia fusion gene protein;SH3 domain protein 2B;SH3 domain-containing GRB2-like protein 1	26.9865	26.8566	27.1008	27.3768	27.5936	27.4518	27.74	27.8516	28.0022	+		+		6	3	2	4	4	5	5	5	4	5	27.2	27.2	41.489	1.639e-72	132970000	121520000	143930000	1.32807e+08	174270000	202540000	183570000	1.86793e+08	224160000	242200000	268840000	2.45067e+08	0.710982	0.541921	0.762214	3	2	4	4	5	5
5229	Charged multivesicular body protein 4b;Chromatin-modifying protein 4b;SNF7 homolog associated with Alix 1;SNF7-2;Vacuolar protein sorting-associated protein 32-2	27.9211	27.5608	27.4689	29.2465	28.6715	28.5819	29.1407	29.0997	28.6417	+		+		6	4	4	4	5	3	4	4	6	5	39.3	39.3	24.95	1.2999e-129	254150000	197990000	185770000	2.12637e+08	636910000	427560000	401790000	4.88753e+08	591880000	575280000	418820000	528660000	0.435059	0.402218	0.924514	4	4	4	5	3	4
112	Endosulfine alpha;Putative uncharacterized protein ENSA;Alpha-endosulfine;ARPP-19e	31.0656	31.2701	31.4977	32.0079	31.8855	31.7194	32.2465	32.2338	32.0119	+		+		7	4	6	5	5	5	5	5	5	6	34.8	34.8	20.994	3.7253e-161	2247400000	2589600000	3032200000	2.62307e+09	4318500000	3967400000	3535900000	3940600000	5095400000	5050500000	4330500000	4.82547e+09	0.665652	0.543588	0.816626	15	15	16	21	15	14
416	Histone H2B;HIRA-interacting protein 1;Histone H2B type 1-K;Histone H2B type F-S;Histone H2B.s;HIRA-interacting protein 2;Histone H2B type 1-D;Histone H2B.1 B;Histone H2B.b;Histone H2B type 1-C/E/F/G/I;Histone H2B.1 A;Histone H2B.a;Histone H2B.g;Histone H2B.h;Histone H2B.k;Histone H2B.l;Histone H2B type 2-F;Histone H2B type 1-H;Histone H2B.j;Histone H2B type 1-N;Histone H2B.d;Histone H2B type 1-M…	33.562	33.2395	33.3252	30.1231	31.7066	31.4203	31.8375	32.3701	32.2529	+		+		7	6	7	5	4	4	5	5	4	4	35.5	35.5	18.041	1.0239e-233	12681000000	10141000000	10762000000	1.11947e+10	1169400000	3504600000	2873800000	2.51593e+09	3837400000	5550900000	5117900000	4835400000	4.44951	2.31515	0.520315	45	61	42	11	15	19
514	UPF0464 protein C15orf44;cDNA FLJ50705;cDNA FLJ50701	26.3755	26.42	26.4031	25.6778	25.3599	26.0755	25.696	25.5858	25.5399	+		+		7	5	5	6	5	6	6	5	3	4	15.3	15.3	57.47	3.034e-54	87061000	89790000	88741000	8.85307e+07	53679000	43062000	70717000	5.58193e+07	54357000	50359000	48782000	51166000	1.58602	1.73026	1.09095	6	5	7	5	7	6
1121	Alpha-SGT;Small glutamine-rich tetratricopeptide repeat-containing protein alpha;Vpu-binding protein	28.0249	27.7785	27.9261	29.0628	29.0597	28.4479	28.7504	28.5147	28.557	+		+		7	5	6	6	7	5	6	6	5	6	26.8	26.8	34.063	2.5617e-107	273100000	230230000	255040000	252790000	560740000	559550000	366170000	4.95487e+08	451570000	383520000	394910000	410000000	0.510185	0.616561	1.2085	7	8	9	9	9	10
1618	Heart and RRM expressed sequence;RNA-binding protein with multiple splicing;cDNA FLJ61582, highly similar to RNA-binding protein with multiple splicing;HCG2043421, isoform CRA_c	27.979	28.4703	28.4033	25.6744	26.3727	17.4345	17.0097	17.5681	17.4943	+		+		7	6	7	7	2	2	1	1	1	1	49.5	49.5	21.802	2.2468e-35	264550000	371900000	355010000	3.30487e+08	53549000	86893000	0	46814000	0	0	0	0	7.05957	3.30487e+08	46814001	8	9	9	2	3	1
2369	DDAHI;Dimethylargininase-1;N(G),N(G)-dimethylarginine dimethylaminohydrolase 1;cDNA FLJ54083, highly similar to NG,NG-dimethylarginine dimethylaminohydrolase 1 (EC 3.5.3.18);cDNA FLJ54119, highly similar to NG,NG-dimethylarginine dimethylaminohydrolase 1 (EC 3.5.3.18);Dimethylarginine dimethylaminohydrolase 1, isoform CRA_a;Putative uncharacterized protein DKFZp686N2176	26.9172	27.4101	27.5437	28.6968	28.0746	29.0142	28.8308	28.8358	28.4762	+		+		7	4	3	5	6	5	5	5	5	4	42.8	40	31.121	3.1386e-160	126730000	178340000	195650000	1.66907e+08	435100000	282680000	542180000	4.19987e+08	477460000	479110000	373400000	4.43323e+08	0.397409	0.37649	0.94736	4	3	6	7	6	8
2532	Carcinoembryonic antigen;Carcinoembryonic antigen-related cell adhesion molecule 5;Meconium antigen 100	17.1219	17.7028	17.0186	17.5755	25.7661	25.7492	27.5215	27.5497	27.97	+		+		7	1	1	0	1	3	2	3	5	6	16.1	16.1	76.794	9.2052e-280	0	0	0	0	0	57067000	56401000	3.78227e+07	192660000	196460000	262910000	2.17343e+08	2.64392e-08	4.60102e-09	0.174023	1	1	0	2	4	2
2804	Adipocyte acid phosphatase;Low molecular weight cytosolic acid phosphatase;Low molecular weight phosphotyrosine protein phosphatase;Red cell acid phosphatase 1;Putative uncharacterized protein ACP1	29.1791	29.0717	29.3328	29.6636	29.5922	29.4932	29.9198	29.6965	29.9784	+		+		7	5	6	6	6	6	4	6	6	5	36.1	36.1	18.042	4.5498e-287	607820000	564210000	676180000	616070000	850400000	809380000	755690000	8.05157e+08	1015700000	870030000	1057800000	9.81177e+08	0.765155	0.627889	0.820603	8	9	10	10	10	8
3109	Emerin	28.5625	28.6763	28.2177	28.0023	28.2581	27.5532	27.4926	27.1937	27.1997	+		+		7	4	6	2	2	3	2	2	3	2	33.5	33.5	28.994	1.034e-81	396440000	428980000	312150000	379190000	268870000	321030000	196940000	262280000	188840000	153500000	154140000	1.65493e+08	1.44575	2.29127	1.58484	6	8	4	4	4	3
3271	Huntingtin-interacting protein 2;Ubiquitin carrier protein;Ubiquitin-conjugating enzyme E2 K;Ubiquitin-conjugating enzyme E2-25 kDa;Ubiquitin-protein ligase;cDNA FLJ57995, moderately similar to Ubiquitin-conjugating enzyme E2-25 kDa (EC 6.3.2.19)	29.3035	29.2255	29.0874	29.512	29.4977	29.8455	29.7383	29.7129	29.8164	+		+		7	4	6	4	5	4	5	6	5	4	47.5	47.5	22.406	4.133e-97	662560000	627710000	570390000	620220000	765570000	758060000	964690000	829440000	895590000	880000000	945420000	9.07003e+08	0.747758	0.683812	0.914484	5	9	6	7	6	7
3311	40S ribosomal protein S11	29.6967	29.4579	30.1151	30.9333	31.2052	30.6458	30.8879	30.5882	30.844	+		+		7	6	6	7	7	7	5	7	7	6	41.1	41.1	18.431	7.2273e-108	870140000	737420000	1162900000	9.23487e+08	2050500000	2475700000	1680000000	2.06873e+09	1986900000	1614200000	1927400000	1.84283e+09	0.446402	0.501123	1.12258	9	11	12	12	14	10
3399	Cytokine-induced protein of 29 kDa;Nuclear protein Hcc-1;Proliferation-associated cytokine-inducible protein CIP29;SAP domain-containing ribonucleoprotein	30.2135	30.3101	30.1853	29.4744	29.8729	29.2176	29.2293	29.0148	29.2518	+		+		7	6	5	7	6	6	5	6	6	5	37.1	37.1	23.671	6.0365e-148	1245000000	1331200000	1220900000	1265700000	745900000	983210000	624290000	7.84467e+08	629360000	542410000	639250000	6.03673e+08	1.61345	2.09666	1.29949	8	7	11	7	9	8
5488	Hypoxia-inducible factor prolyl hydroxylase 4;Transmembrane prolyl 4-hydroxylase	26.7405	27.2178	27.3835	27.9821	28.4693	28.285	28.0951	28.536	28.3937	+		+		7	2	3	5	6	6	6	7	4	6	21.5	21.5	63.112	3.9438e-66	112120000	156090000	175090000	1.47767e+08	265130000	371630000	327060000	3.21273e+08	286720000	389230000	352670000	3.42873e+08	0.459941	0.430966	0.937003	2	4	5	7	7	7
5675	ESCRT-I complex subunit VPS28;Vacuolar protein sorting-associated protein 28 homolog	29.0757	29.3161	29.2958	29.9485	30.0628	29.6832	30.1965	30.1498	29.7106	+		+		7	2	5	4	6	5	4	5	6	6	42.1	42.1	25.425	1.5409e-169	565800000	668370000	659050000	6.31073e+08	1036100000	1121500000	862070000	1.00656e+09	1230400000	1191200000	878560000	1.10005e+09	0.626963	0.573675	0.915007	2	6	6	6	7	4
5914	Heme-binding protein 2;Placental protein 23;Protein SOUL	27.8023	27.9638	27.7616	28.2823	28.3774	28.0393	28.3166	28.315	28.475	+		+		7	3	4	3	4	5	4	4	5	5	42.9	42.9	22.875	7.3437e-293	234060000	261790000	227550000	2.41133e+08	326450000	348700000	275840000	3.16997e+08	334300000	333930000	373100000	347110000	0.760681	0.694689	0.913246	5	7	5	6	8	6
5926	Cysteine desulfurase, mitochondrial;cDNA FLJ60737, highly similar to Cysteine desulfurase, mitochondrial (EC 2.8.1.7)	28.391	28.6447	28.5082	27.7598	27.9702	28.2697	27.7726	27.6207	27.9814	+		+		7	5	3	7	5	4	3	5	4	4	25.2	25.2	50.195	4.8963e-49	352000000	419680000	381780000	3.84487e+08	227260000	262940000	323610000	271270000	229290000	206370000	264990000	233550000	1.41736	1.64627	1.16151	5	5	8	5	4	4
598	Putative uncharacterized protein GATAD2A;GATA zinc finger domain-containing protein 2A;Transcriptional repressor p66-alpha;cDNA FLJ55704, highly similar to Transcriptional repressor p66 alpha	27.4715	27.8107	27.7636	27.2301	27.1946	27.121	26.8007	26.7972	27.0737	+		+		8	4	6	5	2	4	5	3	4	4	26	22.8	70.349	3.3803e-57	186100000	235420000	227870000	2.16463e+08	157430000	153600000	145960000	152330000	116900000	116620000	141250000	1.24923e+08	1.42102	1.73277	1.21939	4	6	7	2	4	5
741	C11orf30 protein;Chromosome 11 open reading frame 30;Chromosome 11 open reading frame 30, isoform CRA_c;Protein EMSY	25.0066	25.36	25.2307	24.8232	24.7457	24.34	23.8359	23.4074	23.7479	+		+		8	4	5	5	3	3	4	3	3	4	10.5	10.5	143.19	9.9757e-54	33709000	43063000	39373000	38715000	29684000	28132000	21236000	2.63507e+07	14973000	11126000	14087000	1.33953e+07	1.46922	2.89019	1.96715	5	7	7	5	4	5
1123	Epidermal surface antigen;Flotillin-2;Membrane component chromosome 17 surface marker 1	28.1563	28.2383	28.3262	27.0089	26.5476	27.5934	27.1298	26.7334	26.6109	+		+		8	6	6	4	4	3	5	5	2	3	22.2	22.2	53.137	1.2445e-89	299150000	316640000	336530000	317440000	135050000	98091000	202510000	145217000	146850000	111570000	102490000	1.20303e+08	2.18597	2.63866	1.20709	7	7	4	4	3	5
1164	NADH dehydrogenase [ubiquinone] flavoprotein 2, mitochondrial;NADH-ubiquinone oxidoreductase 24 kDa subunit	28.7879	29.1801	28.919	28.2659	28.5244	28.19	27.9504	28.249	28.2794	+		+		8	5	6	7	6	6	6	6	6	7	39.3	39.3	27.907	3.9549e-213	463470000	608240000	507560000	5.26423e+08	322760000	386090000	306220000	3.38357e+08	259370000	319010000	325800000	3.01393e+08	1.55582	1.74663	1.12264	11	13	13	10	12	9
1313	Dimethylallyltranstransferase;Farnesyl diphosphate synthase;Farnesyl pyrophosphate synthase;Geranyltranstransferase	30.3366	30.511	30.2041	30.9862	30.6708	30.6376	31.5155	31.491	31.3895	+		+		8	4	5	4	5	5	5	6	6	5	34.8	34.8	48.275	1.1325e-89	1355900000	1530100000	1236900000	1374300000	2127100000	1709400000	1670400000	1.83563e+09	3069800000	3018100000	2813100000	2967000000	0.748679	0.463195	0.618683	6	9	8	9	8	9
1856	Acyl-coenzyme A thioesterase 1;CTE-I;CTE-Ib;Inducible cytosolic acyl-coenzyme A thioester hydrolase;Long chain acyl-CoA thioester hydrolase	29.0304	29.0413	29.0618	29.4949	29.291	29.2176	28.7643	28.7288	28.7554	+		+		8	6	6	6	7	6	7	6	6	5	31.1	31.1	46.277	7.508e-94	548290000	552450000	560370000	5.53703e+08	756550000	656850000	624260000	679220000	455940000	444870000	453160000	4.51323e+08	0.815205	1.22684	1.50495	8	7	7	9	7	8
2303	SH3 domain-binding glutamic acid-rich-like protein	30.5024	30.5795	30.2178	31.3515	31.133	30.862	31.8786	31.6519	31.3288	+		+		8	7	7	8	7	8	8	8	8	8	75.4	75.4	12.774	0	1521000000	1604500000	1248700000	1.45807e+09	2739900000	2354800000	1951600000	2.34877e+09	3948400000	3374100000	2697200000	3339900000	0.62078	0.43656	0.703245	22	20	20	30	26	30
2864	Cytidine monophosphate kinase;Cytidylate kinase;Deoxycytidylate kinase;UMP-CMP kinase;Uridine monophosphate kinase;Uridine monophosphate/cytidine monophosphate kinase;Cytidine monophosphate (UMP-CMP) kinase 1, cytosolic	30.6727	30.3246	30.3644	30.8843	30.6586	30.6453	30.9749	30.9211	31.0572	+		+		8	4	7	7	7	7	5	7	6	6	45.4	45.4	22.222	4.8666e-120	1711600000	1344700000	1382300000	1.47953e+09	1982000000	1694900000	1679400000	1.78543e+09	2110500000	2033200000	2234300000	2126000000	0.828669	0.695923	0.839809	8	13	10	14	12	10
3270	NEDD8 carrier protein;NEDD8 protein ligase;NEDD8-conjugating enzyme Ubc12;Ubiquitin-conjugating enzyme E2 M	29.1548	29.2969	29.1715	30.0136	29.928	29.5761	29.7357	29.5357	29.8026	+		+		8	5	7	4	7	6	6	7	5	4	48.1	48.1	20.9	1.5837e-65	597700000	659570000	604640000	6.20637e+08	1083900000	1021500000	800370000	968590000	894030000	778290000	936410000	8.69577e+08	0.640763	0.713723	1.11386	6	8	6	9	10	8
3850	Smu-1 suppressor of mec-8 and unc-52 protein homolog;WD40 repeat-containing protein SMU1;cDNA FLJ54259, highly similar to Smu-1 suppressor of mec-8 and unc-52 protein homolog	30.1926	29.8586	29.619	28.9947	28.9654	29.1069	28.917	28.6402	28.9537	+		+		8	6	6	6	6	5	5	3	5	5	23.8	23.8	57.543	7.9816e-141	1227100000	973480000	824530000	1008370000	534890000	524140000	578170000	5.45733e+08	506840000	418360000	519930000	481710000	1.84773	2.09331	1.13291	10	10	10	7	6	6
3963	Tudor and KH domain-containing protein;Tudor domain-containing protein 2;Tudor and KH domain containing;Tudor and KH domain containing, isoform CRA_a;cDNA FLJ54003, highly similar to Tudor and KH domain-containing protein	27.1495	27.4138	26.9889	27.3482	27.8906	27.9975	28.253	28.2936	27.9755	+		+		8	3	5	3	5	5	5	6	5	6	20.1	20.1	62.045	2.8544e-134	148870000	178800000	133190000	153620000	170850000	248830000	267970000	2.29217e+08	319880000	329030000	263920000	3.04277e+08	0.670196	0.504869	0.753317	3	5	3	5	6	5
4197	Glycerophosphodiester phosphodiesterase domain-containing protein 3	27.0215	27.4864	26.9677	29.2944	28.7834	28.3171	29.779	29.6441	29.0452	+		+		8	2	5	2	7	6	6	8	8	8	24.5	24.5	36.596	1.2835e-224	136230000	188030000	131250000	1.51837e+08	658400000	462040000	334430000	4.84957e+08	921240000	839010000	553960000	7.71403e+08	0.313093	0.196832	0.628668	3	7	2	10	8	8
5104	46 kDa DNA polymerase delta interaction protein;Polymerase delta-interacting protein 3;S6K1 Aly/REF-like target;cDNA FLJ52566, highly similar to Polymerase delta-interacting protein 3	28.9228	29.2355	29.4581	28.3684	28.7164	28.246	28.0899	28.3085	28.0908	+		+		8	6	7	7	5	4	5	4	4	3	33	33	46.089	4.1477e-93	508890000	632060000	737490000	6.26147e+08	346540000	441060000	318350000	368650000	285700000	332430000	285880000	3.01337e+08	1.69849	2.0779	1.22338	9	9	11	7	6	8
5152	SRA stem-loop-interacting RNA-binding protein, mitochondrial	31.9197	32.4493	32.1588	30.6175	31.4027	30.8394	30.9641	31.1673	30.9073	+		+		8	7	8	8	7	6	7	7	6	6	77.1	77.1	12.349	2.1045e-109	4062500000	5864100000	4794700000	4907100000	1647400000	2838900000	1921200000	2.13583e+09	2094700000	2411500000	2013900000	2.17337e+09	2.29751	2.25783	0.98273	15	16	20	10	11	10
5328	Protein S100-A14;S100 calcium-binding protein A14	28.8397	29.3129	29.3935	30.6381	30.4416	29.8907	30.9001	31.0821	30.8692	+		+		8	5	6	3	6	6	4	7	7	4	70.2	70.2	11.662	5.1689e-76	480430000	666910000	705240000	6.17527e+08	1671100000	1458300000	995400000	1.37493e+09	2003800000	2273200000	1961300000	2.07943e+09	0.449132	0.296969	0.661206	7	7	5	10	10	6
5684	mRNA turnover protein 4 homolog	26.738	27.2055	27.3148	25.8466	25.1536	25.8827	25.6943	25.7411	25.7797	+		+		8	7	6	6	3	2	2	3	3	3	42.3	42.3	27.56	6.9537e-26	111930000	154760000	166940000	1.44543e+08	60338000	37324000	61867000	5.31763e+07	54294000	56086000	57605000	55995000	2.71819	2.58136	0.949662	7	7	6	3	2	2
820	HCG32827, isoform CRA_d;Putative uncharacterized protein C17orf49;MLL1/MLL complex subunit C17orf49	29.9408	29.7873	29.6675	29.5682	29.5015	29.0985	29.2265	29.0212	28.8926	+		+		9	7	8	7	5	7	6	5	7	5	45.1	45.1	24.767	1.5645e-176	1030600000	926530000	852720000	9.36617e+08	796020000	760040000	574790000	7.10283e+08	628130000	544810000	498350000	5.57097e+08	1.31865	1.68125	1.27497	10	12	8	7	10	7
1460	ALL-1;C-terminal cleavage product of 180 kDa;CXXC-type zinc finger protein 7;Histone-lysine N-methyltransferase MLL;Lysine N-methyltransferase 2A;MLL cleavage product C180;MLL cleavage product N320;N-terminal cleavage product of 320 kDa;Trithorax-like protein;Zinc finger protein HRX	24.5824	25.2986	25.2195	23.7128	24.4636	23.9018	23.3791	23.5664	23.4447	+		+		9	5	7	4	2	3	2	2	3	3	4.1	4.1	432.05	1.2752e-112	25121000	41269000	39069000	35153000	13749000	23136000	15673000	1.75193e+07	10910000	12422000	11417000	11583000	2.00653	3.03488	1.5125	7	9	6	3	3	2
2023	Copper transport protein ATOX1;Metal transport protein ATX1	29.6417	29.605	29.7818	30.8451	30.4088	30.299	30.7187	30.5878	30.3246	+		+		9	5	4	6	6	6	4	6	7	5	88.2	88.2	7.4016	9.1825e-103	837610000	816550000	923060000	8.59073e+08	1928800000	1425500000	1321000000	1.55843e+09	1767100000	1613800000	1344700000	1575200000	0.551242	0.545374	0.989356	7	5	9	7	9	6
2509	Calcium-activated neutral proteinase small subunit;Calcium-dependent protease small subunit;Calcium-dependent protease small subunit 1;Calpain regulatory subunit;Calpain small subunit 1	29.503	29.5466	29.8576	30.3782	30.0872	30.3354	30.295	30.6777	30.3183	+		+		9	6	8	5	7	7	7	6	7	7	67.2	67.2	28.315	5.762e-287	760840000	784160000	972820000	8.39273e+08	1395600000	1140600000	1354800000	1297000000	1317400000	1717500000	1338800000	1457900000	0.647088	0.575673	0.889636	18	23	21	20	23	29
2889	Protein kinase B;Proto-oncogene c-Akt;RAC-alpha serine/threonine-protein kinase;RAC-PK-alpha;cDNA FLJ53606, highly similar to RAC-alpha serine/threonine-protein kinase (EC 2.7.11.1)	26.9241	27.0179	26.8715	27.0919	27.058	27.3564	27.4291	27.4337	27.4107	+		+		9	6	5	5	5	5	8	4	6	3	25.8	25.8	55.686	9.5467e-84	127340000	135890000	122780000	128670000	143050000	139720000	171830000	1.51533e+08	180710000	181280000	178420000	1.80137e+08	0.84912	0.714291	0.841213	6	6	5	5	5	9
2894	Heterogeneous nuclear ribonucleoprotein 2H9;Heterogeneous nuclear ribonucleoprotein H3;cDNA FLJ57726, highly similar to Heterogeneous nuclear ribonucleoprotein H3	31.1539	31.9846	31.2567	30.239	30.2809	29.6897	30.1512	29.7532	29.4631	+		+		9	7	9	7	5	7	5	5	6	5	48.3	46.5	36.926	0	2389300000	4249400000	2565700000	3.06813e+09	1267200000	1304500000	865940000	1145880000	1192400000	904930000	740060000	9.45797e+08	2.67753	3.24397	1.21155	19	16	12	7	9	8
3400	Serine beta-lactamase-like protein LACTB, mitochondrial	26.974	27.0128	26.5033	26.4591	25.8035	26.2193	25.6186	25.5533	25.9533	+		+		9	4	7	7	4	4	3	4	4	3	29.6	29.6	60.693	1.0096e-106	131820000	135410000	95123000	1.20784e+08	92255000	58564000	78124000	7.63143e+07	51518000	49240000	64973000	5.52437e+07	1.58272	2.18639	1.38141	5	7	8	5	5	3
3620	GDP-4-keto-6-deoxy-D-mannose-3,5-epimerase-4-reductase;GDP-L-fucose synthase;Protein FX;Red cell NADP(H)-binding protein;Short-chain dehydrogenase/reductase family 4E member 1	26.2947	26.1071	26.1601	26.5759	27.2067	26.9837	27.0243	27.3887	27.2605	+		+		9	3	2	3	4	4	4	2	6	8	54.5	54.5	35.892	4.5365e-54	82315000	72282000	74987000	76528000	100030000	154890000	132710000	129210000	136500000	175720000	160780000	1.57667e+08	0.592276	0.485378	0.819514	3	2	3	4	5	4
3812	Cleavage and polyadenylation specificity factor 68 kDa subunit;Cleavage and polyadenylation specificity factor subunit 6;Pre-mRNA cleavage factor Im 68 kDa subunit;Protein HPBRII-4/7;Putative uncharacterized protein CPSF6	28.3969	28.8869	28.3026	27.5486	27.754	27.716	27.5082	27.7573	27.657	+		+		9	7	8	7	4	7	6	5	4	7	21.1	21.1	63.47	3.6245e-247	353430000	496380000	331090000	3.93633e+08	196310000	226360000	220470000	214380000	190890000	226870000	211630000	2.09797e+08	1.83615	1.87626	1.02185	8	11	8	5	7	7
4042	TBC1 domain family member 9B	26.2909	25.6338	26.0965	27.3636	26.8987	27.1997	27.4084	27.0924	27.606	+		+		9	2	5	4	6	5	5	5	4	5	11.2	11.2	140.52	3.754e-24	82103000	52064000	71752000	6.86397e+07	172690000	125120000	154140000	150650000	178140000	143100000	204290000	1.75177e+08	0.455623	0.391831	0.859989	2	5	4	6	5	5
4606	Beta-catenin-like protein 1;Nuclear-associated protein;Testis development protein NYD-SP19	28.7851	29.2859	29.4681	28.5838	28.4756	28.1823	28.1431	28.2356	28.0487	+		+		9	4	9	7	5	5	6	4	2	4	23.6	23.6	65.173	4.7229e-87	462560000	654550000	742630000	6.19913e+08	402340000	373250000	304590000	360060000	296430000	316060000	277660000	2.96717e+08	1.72169	2.08924	1.21348	5	12	9	6	5	6
5844	28S ribosomal protein S23, mitochondrial	29.3971	29.4153	29.0439	28.9668	28.7771	28.6244	28.5422	28.3501	28.3828	+		+		9	6	8	6	8	8	6	7	5	6	54.7	54.7	21.77	6.3558e-51	706960000	715960000	553450000	658790000	524660000	460020000	413820000	4.66167e+08	390900000	342160000	350000000	361020000	1.41321	1.8248	1.29125	10	12	10	12	10	9
474	75 kDa DNA-pairing protein;Oncogene FUS;Oncogene TLS;POMp75;RNA-binding protein FUS;Translocated in liposarcoma protein;cDNA FLJ58049, highly similar to RNA-binding protein FUS;Putative uncharacterized protein FUS	32.1476	32.0234	31.931	31.2155	31.4469	30.5888	31.3029	31.2633	31.1327	+		+		10	9	9	8	8	9	10	10	8	8	16.9	16.9	53.425	1.1261e-185	4757600000	4365300000	4094400000	4.40577e+09	2493500000	2927200000	1614900000	2345200000	2649200000	2577400000	2354400000	2527000000	1.87863	1.74348	0.928057	27	33	25	17	20	16
591	Leukocyte elastase inhibitor;Monocyte/neutrophil elastase inhibitor;Peptidase inhibitor 2;Serpin B1;cDNA FLJ53963, highly similar to Leukocyte elastase inhibitor;cDNA FLJ57130, highly similar to Leukocyte elastase inhibitor	28.4926	28.5717	29.0777	29.7117	29.597	30.1678	29.7915	29.764	30.0002	+		+		10	5	6	7	9	8	9	9	9	9	35.4	35.4	42.741	5.0403e-199	377680000	398980000	566580000	4.47747e+08	879270000	812060000	1206200000	9.65843e+08	929230000	911720000	1073900000	9.71617e+08	0.463581	0.460826	0.994058	7	9	10	13	11	16
1473	Coated vesicle-associated kinase of 90 kDa;N-terminal kinase-like protein;SCY1-like protein 1;Telomerase regulation-associated protein;Telomerase transcriptional element-interacting factor;Teratoma-associated tyrosine kinase	25.911	26.5025	26.3445	27.0038	27.218	27.4855	27.606	27.2269	27.2908	+		+		10	5	2	3	6	6	7	6	5	6	20.8	20.8	89.63	3.3794e-95	63095000	95069000	85211000	81125000	134570000	156110000	187920000	1.59533e+08	204290000	157080000	164190000	1.75187e+08	0.508514	0.463077	0.910648	5	2	3	8	6	7
1598	Antigen NY-CO-28;PCTP-like protein;Serologically defined colon cancer antigen 28;StAR-related lipid transfer protein 10;START domain-containing protein 10	27.4343	27.5873	27.9036	28.6269	28.3428	28.313	28.5207	28.4358	28.9222	+		+		10	4	6	7	6	8	6	8	6	7	43	43	33.048	5.8001e-233	181360000	201650000	251090000	2.11367e+08	414530000	340430000	333470000	362810000	385120000	363110000	508680000	418970000	0.582582	0.504491	0.865957	5	8	9	8	12	8
2454	Anterior gradient protein 2 homolog;HPC8;Secreted cement gland protein XAG-2 homolog;Putative uncharacterized protein AGR2	31.6177	32.3596	33.2008	32.9118	33.3635	32.9827	34.2799	34.7019	34.737	+		+		10	7	8	8	7	7	6	7	9	9	57.7	57.7	19.979	0	3295100000	5510600000	9872900000	6226200000	8080300000	11051000000	8487800000	9.20637e+09	20858000000	27945000000	28634000000	2.58123e+10	0.676293	0.24121	0.356665	24	24	33	24	35	27
2661	Bifunctional methylenetetrahydrofolate dehydrogenase/cyclohydrolase, mitochondrial;Methenyltetrahydrofolate cyclohydrolase;NAD-dependent methylenetetrahydrofolate dehydrogenase;Putative uncharacterized protein MTHFD2;cDNA FLJ52745, highly similar to Bifunctional methylenetetrahydrofolatedehydrogenase/cyclohydrolase, mitochondrial;Methylenetetrahydrofolate dehydrogenase (NADP+ dependent) 2, methen…	28.0028	28.7325	28.531	27.3493	26.8012	27.4276	27.2971	27.1174	27.1164	+		+		10	6	8	7	4	3	3	3	3	3	50.3	50.3	37.895	2.07e-151	268950000	446000000	387860000	3.67603e+08	170980000	116940000	180520000	1.56147e+08	164910000	145600000	145500000	1.52003e+08	2.35422	2.41839	1.02726	8	13	11	5	4	5
2705	Cold shock domain-containing protein A;DNA-binding protein A;Single-strand DNA-binding protein NF-GMB	30.7059	30.8219	31.1363	30.6858	30.8157	30.5261	29.8683	29.8428	30.1777	+		+		10	7	9	8	4	6	5	5	6	6	37.6	37.6	40.089	1.4452e-246	1751400000	1898100000	2360300000	2.00327e+09	1727200000	1889900000	1546200000	1721100000	980040000	962920000	1214500000	1.05249e+09	1.16395	1.90337	1.63527	15	18	16	15	11	14
2809	3-mercaptopyruvate sulfurtransferase;Mercaptopyruvate sulfurtransferase	29.0529	29.9331	29.7699	28.7417	28.7155	28.4888	28.3998	28.0611	27.8818	+		+		10	7	10	8	8	5	6	6	8	6	56.9	54.9	33.178	2.2588e-241	556930000	1025100000	915470000	832500000	448870000	440790000	376680000	4.22113e+08	354160000	280050000	247320000	2.93843e+08	1.97222	2.83314	1.43653	12	18	16	12	6	9
2828	Adenylate kinase 3-like;Adenylate kinase isoenzyme 4, mitochondrial;ATP-AMP transphosphorylase;HCG2031840, isoform CRA_c	30.1397	30.8029	31.0968	32.1161	32.268	31.8602	32.3336	32.3835	32.2972	+		+		10	8	9	10	9	9	10	9	9	9	54.3	54.3	25.268	1.2005e-98	1182900000	1873300000	2296600000	1.78427e+09	4655000000	5171800000	3898400000	4.57507e+09	5412500000	5602600000	5277500000	5.43087e+09	0.389998	0.328542	0.842419	10	13	17	18	19	19
3294	14-3-3 protein gamma;14-3-3 protein gamma, N-terminally processed;Protein kinase C inhibitor protein 1;cDNA FLJ52141, highly similar to 14-3-3 protein gamma;cDNA FLJ51843, highly similar to 14-3-3 protein gamma	29.8177	29.2622	29.5151	30.0854	30.4515	29.953	30.481	30.6804	30.3044	+		+		10	5	9	6	5	8	8	6	8	8	62.3	45.3	28.302	1.1985e-185	946300000	643890000	767260000	7.85817e+08	1139200000	1468300000	1039300000	1215600000	1498600000	1720700000	1326000000	1515100000	0.646443	0.518657	0.802323	7	10	7	7	10	10
3635	Isopentenyl pyrophosphate isomerase 1;Isopentenyl-diphosphate Delta-isomerase 1	27.6011	28.191	28.4693	29.6641	29.5538	29.3058	29.9966	30.0448	30.2202	+		+		10	2	5	4	9	6	7	7	8	9	50.4	50.4	32.485	1.6713e-192	203590000	306440000	371630000	2.93887e+08	850700000	788110000	663630000	767480000	1071200000	1107600000	1250800000	1143200000	0.382924	0.257074	0.671344	3	6	5	13	11	9
3668	Galactowaldenase;UDP-galactose 4-epimerase;UDP-glucose 4-epimerase;UDP-galactose-4-epimerase	27.8837	27.8397	28.0441	28.4223	28.2856	28.7575	28.8545	28.7491	29.4927	+		+		10	4	3	4	4	3	5	6	9	6	46.8	46.8	38.281	1.1121e-233	247640000	240210000	276770000	2.54873e+08	359710000	327210000	453820000	3.80247e+08	485360000	451160000	755430000	5.63983e+08	0.670284	0.451916	0.674216	6	5	7	5	6	7
3932	Torsin-1A-interacting protein 1;Putative uncharacterized protein TOR1AIP1	30.222	30.4991	30.2662	29.6994	29.9548	29.8714	29.7352	29.8047	29.716	+		+		10	8	9	9	8	9	7	8	7	9	27.3	27.3	66.248	4.4857e-271	1252400000	1517500000	1291300000	1.35373e+09	871780000	1040600000	982200000	964860000	893660000	937790000	881870000	904440000	1.40304	1.49676	1.0668	11	12	14	10	12	9
4930	Translin-associated factor X;Translin-associated protein X	27.2031	26.7773	27.0207	27.5538	27.2421	27.2077	27.712	28.1001	27.7466	+		+		10	2	4	4	4	4	3	7	6	5	50.7	50.7	33.112	1.3061e-86	154510000	115020000	136160000	135230000	197020000	158740000	155000000	1.70253e+08	219860000	287730000	225190000	244260000	0.794287	0.553631	0.697017	3	4	5	5	4	3
5375	COPII-associated small GTPase;GTP-binding protein SAR1a;cDNA FLJ58922, highly similar to GTP-binding protein SAR1a;SAR1 gene homolog A (S. cerevisiae)	28.5504	28.4797	28.2725	28.985	29.1196	29.4954	29.5506	29.3866	29.4922	+		+		10	3	6	6	8	8	6	7	7	6	67.7	67.7	22.367	0	393130000	374310000	324240000	3.63893e+08	531330000	583280000	756820000	623810000	786330000	701870000	755150000	7.47783e+08	0.58334	0.486629	0.834212	6	9	8	12	13	10
457	2-methyl branched chain acyl-CoA dehydrogenase;2-methylbutyryl-coenzyme A dehydrogenase;Short/branched chain specific acyl-CoA dehydrogenase, mitochondrial;cDNA FLJ57418, highly similar to Short/branched chain specific acyl-CoAdehydrogenase, mitochondrial (EC 1.3.99.-)	29.1633	29.1053	28.7503	28.1219	28.6546	28.1304	27.872	27.9866	27.9265	+		+		11	6	7	8	4	4	6	4	7	5	33.3	33.3	47.485	1.7817e-217	601230000	577500000	451560000	543430000	292110000	422550000	293820000	336160000	245650000	265950000	255110000	255570000	1.61658	2.12635	1.31533	8	9	9	5	5	7
888	Putative uncharacterized protein RNASET2;Ribonuclease 6;Ribonuclease T2	28.4596	29.2399	28.4171	30.3237	29.9702	29.6187	30.3669	30.0313	30.275	+		+		11	7	7	6	9	10	9	9	9	8	33	33	35.335	2.9654e-257	369150000	634010000	358420000	453860000	1343800000	1051800000	824350000	1.07332e+09	1384700000	1097300000	1299200000	1260400000	0.422857	0.360092	0.851568	8	15	9	16	17	15
1828	160 kDa nucleoporin;Nuclear pore complex protein Nup160;Nucleoporin Nup160;Putative uncharacterized protein NUP160	26.1101	25.5813	25.9896	25.4672	24.3913	24.609	24.3945	24.2426	24.5623	+		+		11	7	6	8	5	4	5	4	5	4	11.8	11.8	162.12	3.7521e-198	72432000	50203000	66626000	63087000	46387000	22004000	25589000	3.13267e+07	22053000	19849000	24773000	22225000	2.01384	2.83856	1.40952	10	9	11	7	5	5
2206	Mitotic checkpoint protein BUB3;cDNA FLJ57899, highly similar to Mitotic checkpoint protein BUB3	30.5597	30.591	30.4835	30.0714	30.2306	29.8925	29.7997	29.1594	29.6717	+		+		11	9	10	10	8	6	10	7	8	9	53.7	53.7	37.154	1.4172e-169	1582700000	1617400000	1501200000	1567100000	1128200000	1259800000	996670000	1.12822e+09	934560000	599600000	855200000	7.96453e+08	1.389	1.9676	1.41656	14	15	16	12	10	13
2445	Chloride intracellular channel protein 3;Chloride intracellular channel 3	28.1408	29.2525	29.4457	30.4372	30.5875	30.3711	30.8564	30.8193	31.2823	+		+		11	6	5	9	8	9	9	9	9	9	52.5	52.5	26.648	3.376e-102	295960000	639540000	731210000	555570000	1453800000	1613400000	1388700000	1485300000	1944100000	1894700000	2611700000	2.15017e+09	0.374046	0.258385	0.690784	7	9	16	16	19	16
2642	Acidic-type mitochondrial creatine kinase;Creatine kinase U-type, mitochondrial;Ubiquitous mitochondrial creatine kinase;cDNA FLJ52224, highly similar to Creatine kinase, ubiquitous mitochondrial (EC 2.7.3.2)	30.1891	30.1831	30.0917	30.8077	30.7892	30.4782	30.8064	30.5982	30.5164	+		+		11	9	9	7	8	10	10	9	11	10	40.8	40.8	47.036	2.2024e-200	1224100000	1219000000	1144200000	1.19577e+09	1879500000	1855500000	1495700000	1.74357e+09	1877800000	1625400000	1535900000	1679700000	0.685816	0.711893	1.03802	12	14	11	12	15	15
2690	GP150;Integrin beta-4	26.2267	26.2178	26.3176	26.0934	26.0844	26.1534	25.7848	25.9398	25.9554	+		+		11	4	8	4	3	3	4	3	5	3	8	8	202.16	2.8517e-35	78526000	78044000	83632000	8.00673e+07	71595000	71151000	74640000	72462000	57810000	64367000	65068000	62415000	1.10496	1.28282	1.16097	4	9	3	3	3	4
2847	Cellular retinoic acid-binding protein 2;Cellular retinoic acid-binding protein II;Cellular retinoic acid binding protein 2	32.1496	31.6069	31.4919	32.401	33.058	33.2319	32.9323	33.0692	32.7196	+		+		11	5	10	8	11	10	10	9	9	11	54.3	54.3	15.693	1.291e-126	4764200000	3270500000	3020100000	3.68493e+09	5671100000	8942200000	10088000000	8.23377e+09	8196100000	9012200000	7072800000	8093700000	0.447539	0.455284	1.01731	14	15	16	19	20	24
2882	Methionine adenosyltransferase 2;Methionine adenosyltransferase II;S-adenosylmethionine synthase isoform type-2;S-adenosylmethionine synthetase	30.4094	29.8917	29.7578	28.8659	28.8391	29.236	28.6771	28.895	28.8829	+		+		11	8	8	10	5	7	6	7	8	6	34.7	34.7	43.66	7.3896e-247	1426100000	996080000	907800000	1.10999e+09	489220000	480200000	632280000	533900000	429220000	499180000	495020000	4.74473e+08	2.07903	2.33942	1.12525	13	12	17	7	8	8
3780	Protein H105e3;Sterol-4-alpha-carboxylate 3-dehydrogenase, decarboxylating;Putative uncharacterized protein NSDHL	28.2016	28.277	28.173	28.4578	28.2869	28.5511	28.8608	28.9401	29.1129	+		+		11	8	6	8	9	8	8	10	8	7	42.1	42.1	41.9	4.0791e-86	308700000	325250000	302630000	3.12193e+08	368670000	327500000	393300000	3.63157e+08	487500000	515030000	580580000	5.27703e+08	0.859666	0.591608	0.688183	10	7	8	12	9	9
4700	Synapse-associated protein 1	27.6261	27.7386	28.0472	28.444	28.8852	28.5392	28.693	28.8427	28.656	+		+		11	3	7	6	6	7	8	6	9	7	35.8	35.8	39.933	0	207150000	223950000	277370000	2.36157e+08	365160000	495820000	390090000	4.17023e+08	433980000	481430000	422980000	446130000	0.566291	0.529345	0.934757	4	10	9	10	11	13
5050	Exophilin-3;Melanophilin;Slp homolog lacking C2 domains a;Synaptotagmin-like protein 2a;cDNA FLJ60288, highly similar to Melanophilin	26.0588	26.616	25.6263	27.244	27.307	26.6931	27.8126	27.4737	28.0632	+		+		11	4	5	2	7	6	5	8	7	9	29.3	29.3	65.948	2.6494e-52	69902000	102850000	51796000	7.48493e+07	158950000	166040000	108500000	1.44497e+08	235740000	186390000	280460000	2.34197e+08	0.518	0.3196	0.616989	4	6	3	8	8	7
5062	Antigen NY-CO-16;Serologically defined colon cancer antigen 16;U3 small nucleolar RNA-associated protein 14 homolog A	26.1769	27.0476	27.7322	18.0955	25.3195	16.3614	15.3268	17.296	16.6711	+		+		11	5	7	5	1	2	1	1	0	0	19.1	19.1	87.977	3.8799e-34	75865000	138720000	222960000	1.45848e+08	0	41872000	0	1.39573e+07	0	0	0	0	10.4496	1.45848e+08	1.39573e+07	5	8	6	1	2	1
5241	HEAT repeat-containing protein 1;Protein BAP28;HEAT repeat containing 1	26.3711	26.2447	25.6717	17.5794	18.0394	23.957	17.7795	17.1499	16.6461	+		+		11	6	9	6	2	0	2	1	1	1	7.3	7.3	242.37	2.4926e-55	86795000	79513000	53449000	7.32523e+07	0	0	16285000	5.42833e+06	0	0	0	0	13.4944	7.32523e+07	5.42833e+06	7	10	8	2	0	2
5532	39S ribosomal protein L15, mitochondrial	28.0142	28.1353	27.8192	26.6763	26.4122	27.321	26.6386	27.2409	27.0393	+		+		11	8	8	6	5	7	4	4	4	3	44.6	44.6	33.419	5.167e-56	271090000	294830000	236820000	267580000	107240000	89304000	167660000	1.21401e+08	104480000	158610000	137920000	133670000	2.20409	2.0018	0.908217	9	9	6	5	7	3
5852	GAP and centrosome-associated protein;Rab GTPase-activating protein 1;Rab6 GTPase-activating protein GAPCenA	26.2439	25.6139	25.2423	27.2536	26.9896	27.3948	27.2149	27.1486	26.9518	+		+		11	4	4	3	7	7	6	5	7	5	12.8	12.8	121.74	1.9407e-220	79471000	51350000	39690000	56837000	160010000	133250000	176460000	1.56573e+08	155780000	148780000	129810000	144790000	0.363006	0.392548	1.08138	3	4	3	8	7	7
1516	Methionine aminopeptidase 1;Peptidase M 1	29.7348	29.6563	29.6946	29.6613	29.3976	29.3879	29.1633	29.002	29.1213	+		+		12	6	10	7	6	6	5	6	6	5	47.4	47.4	43.215	3.8091e-95	893440000	846150000	868870000	8.69487e+08	849050000	707250000	702510000	7.52937e+08	601220000	537600000	583950000	5.74257e+08	1.15479	1.51411	1.31115	10	14	13	9	9	9
1535	Deubiquitinating enzyme OTUB1;OTU domain-containing ubiquitin aldehyde-binding protein 1;Otubain-1;Ubiquitin thioesterase OTUB1;Ubiquitin-specific-processing protease OTUB1	30.7705	30.8746	30.8552	31.8695	31.5604	31.2911	31.621	31.3184	31.4313	+		+		12	10	10	11	12	12	11	10	12	12	50.6	50.6	31.284	3.8311e-143	1831600000	1968700000	1942400000	1.91423e+09	3923600000	3166800000	2627700000	3.23937e+09	3302600000	2677900000	2895700000	2.95873e+09	0.590928	0.646977	1.09485	19	16	20	20	21	20
1781	Fas ligand-associated factor 1;Formin-binding protein 11;Formin-binding protein 3;Huntingtin yeast partner A;Huntingtin-interacting protein 10;Huntingtin-interacting protein A;Pre-mRNA-processing factor 40 homolog A;Renal carcinoma antigen NY-REN-6	27.503	27.4159	27.6986	26.4104	26.7537	26.9038	26.5461	26.3255	26.669	+		+		12	6	5	6	3	4	4	3	3	2	16.5	16.5	108.8	3.8587e-115	190210000	179060000	217830000	195700000	89193000	113150000	125560000	109301000	97986000	84091000	106700000	96259000	1.79047	2.03306	1.13549	6	5	6	3	4	4
2139	High mobility group protein 2a;High mobility group protein 4;High mobility group protein B3	30.7576	30.4128	30.2964	31.529	31.6477	31.0167	31.5801	31.5194	31.528	+		+		12	10	9	10	9	11	9	10	12	9	49.5	49.5	22.98	0	1815400000	1429400000	1318600000	1.52113e+09	3098700000	3364400000	2172500000	2.87853e+09	3210400000	3078200000	3096500000	3.12837e+09	0.52844	0.486239	0.920139	16	13	16	14	19	14
2555	APP secretase;Cathepsin B;Cathepsin B heavy chain;Cathepsin B light chain;Cathepsin B1	31.486	31.6314	31.7725	32.0902	32.2853	31.9126	32.1833	32.1382	32.308	+		+		12	9	9	9	9	10	10	9	10	11	41	41	37.821	0	3007700000	3326600000	3668300000	3334200000	4572100000	5234200000	4042400000	4.61623e+09	4877000000	4726700000	5317000000	4.97357e+09	0.722277	0.670384	0.928154	17	14	17	14	17	17
2900	Calgizzarin;Metastatic lymph node gene 70 protein;Protein S100-A11;Protein S100-C;S100 calcium-binding protein A11	32.0742	31.8562	32.2648	32.4422	32.7517	32.8795	33.1506	33.1326	33.035	+		+		12	7	8	6	6	6	9	8	11	11	86.7	86.7	11.74	0	4521700000	3887600000	5160200000	4.52317e+09	5835400000	7231800000	7901400000	6.98953e+09	9535000000	9416800000	8801200000	9251000000	0.647134	0.488938	0.755544	90	94	100	148	152	109
3200	Alpha-N-acetylglucosaminidase;Alpha-N-acetylglucosaminidase 77 kDa form;Alpha-N-acetylglucosaminidase 82 kDa form;N-acetyl-alpha-glucosaminidase	28.2107	27.9642	28.0098	28.7771	28.4862	28.6689	28.5942	28.7302	28.5216	+		+		12	4	7	7	9	6	9	7	5	6	25.2	25.2	82.265	8.279e-106	310640000	261850000	270270000	280920000	460000000	376010000	426790000	4.20933e+08	405240000	445290000	385350000	411960000	0.667374	0.681911	1.02178	5	7	8	9	6	10
3384	DNA-binding protein NEFA;Gastric cancer antigen Zg4;Nucleobindin-2	29.7548	30.3361	29.969	31.4446	31.4125	30.7716	31.2459	31.5744	31.6042	+		+		12	5	8	7	8	9	8	9	10	9	33.3	33.3	50.195	6.3596e-135	905930000	1355400000	1050900000	1.10408e+09	2922700000	2858300000	1833100000	2.53803e+09	2546600000	3197700000	3264500000	3.00293e+09	0.435013	0.367666	0.845185	8	14	11	13	16	12
3431	Nucleolysin TIAR;TIA-1-related protein;cDNA FLJ75459;TIAL1 protein	29.934	29.9889	29.8705	29.0747	29.5162	29.2643	29.2402	29.2605	29.1355	+		+		12	10	10	12	10	11	10	9	10	8	47.7	47.7	41.59	0	1025700000	1065500000	981560000	1.02425e+09	565410000	767800000	644810000	659340000	634140000	643130000	589750000	622340000	1.55345	1.64581	1.05945	15	17	18	12	15	17
4452	Probable saccharopine dehydrogenase	28.2068	28.2298	27.6688	29.2765	29.0207	28.896	29.4054	29.723	29.7863	+		+		12	6	5	6	9	9	9	10	9	11	48.5	48.5	47.151	1.4188e-262	309800000	314780000	213380000	279320000	650280000	544640000	499550000	5.64823e+08	711080000	886160000	925930000	8.41057e+08	0.494526	0.332106	0.671564	9	6	8	15	11	11
4538	ATP-dependent RNA helicase DDX54;ATP-dependent RNA helicase DP97;DEAD box protein 54;DEAD box RNA helicase 97 kDa	28.0094	28.1864	27.9171	26.7058	25.8039	26.9992	26.8323	26.2573	26.8504	+		+		12	8	10	8	4	2	5	7	3	4	17.9	17.9	98.665	4.7941e-160	270180000	305460000	253440000	276360000	109460000	58579000	134140000	1.00726e+08	119490000	80214000	121000000	1.06901e+08	2.74367	2.58519	0.942236	8	12	9	4	2	5
4620	Golgi-specific brefeldin A-resistance guanine nucleotide exchange factor 1	27.4658	27.7139	27.4772	28.0077	27.8099	28.1247	28.0448	27.9792	27.9416	+		+		12	6	3	5	6	7	7	8	7	6	8.9	8.6	206.44	1.8528e-75	185370000	220150000	186840000	1.97453e+08	269870000	235300000	292680000	265950000	276910000	264600000	257780000	266430000	0.742445	0.741108	0.998198	8	4	6	9	8	9
4803	Bcl-XL-binding protein v68;Phosphoglycerate mutase family member 5;Serine/threonine-protein phosphatase PGAM5, mitochondrial	29.744	29.7934	29.2733	28.9288	28.995	28.7676	28.8664	28.6505	28.4817	+		+		12	7	11	7	6	5	6	6	6	5	49.5	49.5	32.004	1.0527e-57	899160000	930450000	648840000	826150000	511030000	535020000	456990000	5.01013e+08	489400000	421370000	374840000	4.28537e+08	1.64896	1.92784	1.16913	12	15	9	8	8	9
5077	Acetyl-CoA acetyltransferase, cytosolic;Acetyl-CoA transferase-like protein;Cytosolic acetoacetyl-CoA thiolase;cDNA FLJ53975, highly similar to Acetyl-CoA acetyltransferase, cytosolic (EC 2.3.1.9)	29.3376	29.9555	29.7429	30.6498	31.0465	31.3354	31.587	31.4018	31.6032	+		+		12	8	9	9	10	10	10	12	10	10	51.1	51.1	41.35	4.1153e-182	678430000	1041100000	898440000	8.72657e+08	1684600000	2217800000	2709500000	2.20397e+09	3225800000	2837200000	3262300000	3.10843e+09	0.395948	0.280738	0.709028	11	14	17	17	20	23
5078	Lark homolog;RNA-binding motif protein 4;RNA-binding motif protein 4a;RNA-binding protein 4	29.9982	30.4508	30.3345	29.673	29.74	29.5862	29.5574	29.1165	29.3544	+		+		12	7	10	9	9	8	7	8	8	7	54.7	54.7	40.313	1.4373e-242	1072400000	1467600000	1353900000	1.29797e+09	855960000	896640000	806000000	8.52867e+08	790080000	582010000	686350000	6.86147e+08	1.52189	1.89168	1.24298	13	14	14	12	10	10
5107	Alpha-(1,6)-fucosyltransferase;Fucosyltransferase 8;GDP-fucose--glycoprotein fucosyltransferase;GDP-L-Fuc:N-acetyl-beta-D-glucosaminide alpha1,6-fucosyltransferase;Glycoprotein 6-alpha-L-fucosyltransferase	28.2874	28.2539	28.4795	28.8449	28.755	29.0863	29.0188	28.7984	28.8854	+		+		12	7	7	7	8	7	11	8	9	7	29	29	66.515	5.2685e-78	327600000	320100000	374260000	3.40653e+08	482160000	453010000	569980000	5.01717e+08	543920000	466860000	495890000	5.02223e+08	0.678976	0.678291	0.998991	8	9	9	9	9	12
5628	Epithelial protein lost in neoplasm;LIM domain and actin-binding protein 1;cDNA FLJ55990, highly similar to LIM domain and actin-binding protein 1	27.6254	27.7222	27.935	27.1476	27.1809	26.6887	26.9278	27.1621	26.7474	+		+		12	7	8	9	5	4	5	4	5	5	24.1	24.1	85.223	1.1911e-35	207050000	221420000	256610000	228360000	148680000	152150000	108170000	1.36333e+08	127670000	150180000	112660000	130170000	1.67501	1.75432	1.04735	7	9	9	5	4	4
5674	EPB72-like protein 2;Stomatin-like protein 2;cDNA FLJ61039, highly similar to Stomatin-like protein 2	30.3909	30.8357	30.5995	29.4449	29.9084	29.5798	29.306	29.8517	29.7149	+		+		12	8	12	11	9	8	10	10	8	10	48.6	48.6	38.534	0	1407900000	1916300000	1626900000	1.65037e+09	730800000	1007700000	802430000	8.46977e+08	663710000	968870000	881180000	837920000	1.94854	1.9696	1.01081	15	24	20	13	14	15
471	Collapsin response mediator protein 2;Dihydropyrimidinase-related protein 2;N2A3;Unc-33-like phosphoprotein 2;cDNA FLJ53166, highly similar to Dihydropyrimidinase-related protein 2	29.1401	29.4246	29.413	29.725	29.7874	29.9739	30.3715	30.252	30.3638	+		+		13	9	7	10	10	8	11	10	11	12	37.6	37.6	62.293	0	591640000	720590000	714830000	6.75687e+08	887390000	926630000	1054500000	9.56173e+08	1389100000	1278700000	1381700000	1.34983e+09	0.706657	0.50057	0.708364	9	10	12	13	10	15
2053	Pyridoxal kinase;Pyridoxine kinase	29.2976	29.7904	29.2819	29.7681	29.5273	29.6649	30.3345	30.4443	30.7004	+		+		13	9	9	9	9	9	9	11	10	10	56.4	56.4	35.102	1.7785e-302	659860000	928580000	652710000	747050000	914330000	773770000	851190000	846430000	1353900000	1461000000	1744800000	1519900000	0.882589	0.491513	0.556898	17	15	13	16	13	13
2410	6-phosphogluconolactonase	29.2414	29.5286	29.7724	30.129	30.2424	30.054	30.2156	30.4796	30.5065	+		+		13	10	11	11	13	9	12	13	13	13	77.5	77.5	27.547	2.5006e-159	634660000	774450000	917030000	775380000	1174200000	1270200000	1114700000	1.18637e+09	1246800000	1497200000	1525400000	1.42313e+09	0.653575	0.54484	0.83363	11	14	17	17	14	17
3672	Hepatocellular carcinoma protein 1;RNA-binding motif protein 39;RNA-binding protein 39;RNA-binding region-containing protein 2;Splicing factor HCC1;cDNA FLJ59214, highly similar to RNA-binding region-containing protein 2;RBM39 protein	29.0078	29.1213	29.3109	28.0304	28.5484	28.5773	28.2844	28.2286	28.5986	+		+		13	7	10	8	7	7	6	7	7	6	41.8	41.8	58.656	1.2476e-222	539770000	583950000	665980000	5.96567e+08	274150000	392570000	400530000	355750000	326920000	314530000	406490000	3.49313e+08	1.67693	1.70783	1.01843	15	17	13	10	11	9
385	Annexin A7;Annexin VII;Annexin-7;Synexin;cDNA FLJ55060, highly similar to Annexin A7;cDNA FLJ54149, highly similar to Annexin A7	29.1296	28.9914	29.1117	29.7678	29.7302	29.4415	29.5998	29.4903	29.5018	+		+		14	11	11	10	10	12	13	13	12	10	29.5	29.5	52.739	3.3792e-296	587330000	533680000	580080000	567030000	914140000	890620000	729080000	8.44613e+08	813660000	754180000	760190000	776010000	0.671349	0.730699	1.08841	13	14	11	12	16	14
622	M-phase phosphoprotein homolog;Zinc finger RNA-binding protein;Putative uncharacterized protein ZFR	28.3924	28.7724	29.2357	27.6322	27.5669	27.7145	27.2614	27.4169	27.2317	+		+		14	9	8	10	6	2	2	5	3	4	22.9	22.9	117.01	2.2159e-251	352330000	458520000	632170000	4.81007e+08	208030000	198820000	220240000	209030000	160880000	179190000	157600000	165890000	2.30114	2.89955	1.26005	10	11	13	6	2	3
733	EPS8L2 protein;Epidermal growth factor receptor kinase substrate 8-like protein 2;Epidermal growth factor receptor pathway substrate 8-related protein 2	26.7529	27.3715	27.3948	27.9662	28.0044	28.0231	28.0817	28.4344	28.3544	+		+		14	3	3	6	7	6	7	8	10	8	30.6	30.6	82.322	4.1372e-173	113090000	173640000	176460000	1.54397e+08	262220000	269250000	272770000	268080000	284080000	362760000	343180000	3.30007e+08	0.575935	0.467859	0.812347	3	4	7	7	7	8
1211	Lysyl hydroxylase 2;Procollagen-lysine,2-oxoglutarate 5-dioxygenase 2;cDNA FLJ43712 fis, clone TESOP2004114, highly similar to Homo sapiens procollagen-lysine, 2-oxoglutarate 5-dioxygenase 2 (PLOD2), transcript variant 1, mRNA	29.3799	29.4793	29.224	30.021	29.7204	30.0417	30.1996	29.9279	30.3968	+		+		14	9	11	13	12	8	12	14	13	13	26.9	26.9	87.097	5.0456e-268	698620000	748420000	627060000	6.91367e+08	1089500000	884560000	1105200000	1026420000	1233100000	1021400000	1413700000	1.22273e+09	0.673571	0.565427	0.839447	10	15	14	16	10	15
1423	Interferon receptor 1-bound protein 4;Protein arginine N-methyltransferase 1;cDNA FLJ60588, highly similar to Protein arginine N-methyltransferase 1 (EC 2.1.1.-)	31.3643	30.8468	31.2057	30.4908	29.9321	30.1138	29.8764	29.485	29.8082	+		+		14	13	11	9	8	9	10	9	7	7	46.5	46.5	41.515	0	2764400000	1931100000	2476500000	2.39067e+09	1508800000	1024400000	1161900000	1231700000	985590000	751380000	940060000	8.92343e+08	1.94095	2.67909	1.3803	24	19	20	14	14	15
1571	CF-1 77 kDa subunit;Cleavage stimulation factor 77 kDa subunit;Cleavage stimulation factor subunit 3	28.1504	28.0542	28.5719	27.7448	27.5279	27.4305	27.1096	26.5783	27.1691	+		+		14	9	8	7	8	5	6	5	5	6	26.1	26.1	82.921	8.1879e-238	297930000	278710000	399010000	3.25217e+08	224910000	193520000	180880000	199770000	144810000	100200000	150910000	1.31973e+08	1.62796	2.46426	1.51371	14	10	10	11	7	7
2315	Beta-MPP;Mitochondrial-processing peptidase subunit beta;P-52;cDNA FLJ33094 fis, clone TRACH2000703, highly similar to Mitochondrial-processing peptidase subunit beta, mitochondrial (EC 3.4.24.64)	29.8418	29.8943	29.5316	28.6686	29.1563	29.1878	29.208	29.0299	29.0282	+		+		14	11	13	13	10	13	13	11	14	9	36.2	36.2	54.366	1.0449e-225	962200000	997890000	776060000	912050000	426700000	598320000	611500000	5.45507e+08	620120000	548130000	547470000	5.71907e+08	1.67193	1.59475	0.953839	13	15	17	10	15	15
2507	Argininosuccinate lyase;Arginosuccinase	27.0143	27.043	26.6337	28.0927	27.6241	27.7589	28.178	28.1033	28.2216	+		+		14	8	4	4	9	8	4	11	9	8	32.5	32.5	51.657	4.9021e-136	135550000	138280000	104120000	1.25983e+08	286260000	206860000	227120000	240080000	303690000	288360000	313010000	3.01687e+08	0.524756	0.417597	0.795793	9	4	5	11	9	4
2957	ATP-dependent RNA helicase DDX48;ATP-dependent RNA helicase eIF4A-3;DEAD box protein 48;Eukaryotic initiation factor 4A-III;Eukaryotic initiation factor 4A-like NUK-34;Eukaryotic translation initiation factor 4A isoform 3;Nuclear matrix protein 265	29.958	29.5306	29.4587	28.8345	28.9246	28.5489	28.403	28.3355	28.1645	+		+		14	12	11	9	8	9	8	6	7	6	42.1	36.3	46.871	9.1052e-195	1042900000	775530000	737830000	8.52087e+08	478680000	509520000	392720000	4.60307e+08	354930000	338720000	300850000	331500000	1.85113	2.5704	1.38856	22	18	15	13	14	11
3405	ADP-ribosylation factor 1;ADP-ribosylation factor 3;cDNA, FLJ79427, highly similar to ADP-ribosylation factor 3	30.7726	30.905	30.8933	31.6875	31.1559	31.237	31.4456	31.5778	31.6279	+		+		14	9	10	11	12	11	11	11	11	12	80.1	80.1	20.697	0	1834300000	2010600000	1994400000	1.94643e+09	3458500000	2392500000	2530900000	2.79397e+09	2924600000	3205200000	3318500000	3.14943e+09	0.696656	0.618027	0.887133	29	27	24	46	23	28
3537	SF3a60;Spliceosome-associated protein 61;Splicing factor 3A subunit 3	29.6987	30.4414	30.3289	29.0133	28.8577	28.9992	28.6881	28.7747	29.0478	+		+		14	8	12	10	9	10	9	8	9	8	42.3	42.3	58.848	2.7525e-163	871370000	1458100000	1348700000	1.22606e+09	541840000	486460000	536580000	5.21627e+08	432480000	459250000	554970000	4.82233e+08	2.35045	2.54246	1.08169	13	18	18	12	12	11
4367	Modulator of non-genomic activity of estrogen receptor;Proline-, glutamic acid- and leucine-rich protein 1;Transcription factor HMX3;Putative uncharacterized protein PELP1	28.1707	27.7718	27.8218	26.6796	26.7483	27.2619	26.9307	26.8661	27.1029	+		+		14	7	8	7	5	5	7	6	6	5	19.5	19.5	119.7	1.9312e-189	302150000	229160000	237240000	2.56183e+08	107490000	112730000	160940000	1.27053e+08	127920000	122320000	144140000	131460000	2.01634	1.94876	0.966479	12	15	12	6	9	12
5639	Dipeptidyl aminopeptidase II;Dipeptidyl peptidase 2;Dipeptidyl peptidase 7;Dipeptidyl peptidase II;Quiescent cell proline dipeptidase	29.0929	29.4018	28.9049	30.4393	30.2739	29.6505	30.2562	30.4179	30.0557	+		+		14	7	9	8	10	9	8	11	10	12	45.3	45.3	54.341	0	572570000	709280000	502640000	594830000	1455900000	1298200000	842710000	1.19894e+09	1282400000	1434500000	1116000000	1.27763e+09	0.496131	0.465572	0.938404	7	12	10	15	15	13
5808	Thyroid hormone receptor-associated protein 3;Thyroid hormone receptor-associated protein complex 150 kDa component	30.806	30.7522	31.1327	30.1676	30.4688	30.1187	30.1219	30.0067	29.728	+		+		14	12	11	10	9	7	10	10	8	10	23.7	23.7	108.66	3.1657e-242	1877300000	1808500000	2354300000	2.01337e+09	1206000000	1486000000	1165800000	1.28593e+09	1168400000	1078700000	889230000	1.04544e+09	1.56569	1.92585	1.23004	22	16	19	17	13	15
1384	90 kDa ribosomal protein S6 kinase 1;MAP kinase-activated protein kinase 1a;Ribosomal protein S6 kinase alpha-1;Ribosomal S6 kinase 1	27.599	27.8005	27.1008	28.1344	28.1696	28.2099	28.534	28.521	28.4379	+		+		15	7	6	3	10	5	10	12	10	5	27.2	27.2	83.931	1.3647e-72	203300000	233760000	143930000	1.93663e+08	294650000	301920000	310470000	3.02347e+08	388690000	385180000	363630000	3.79167e+08	0.640534	0.51076	0.797398	8	6	3	13	8	12
2063	Coatomer subunit epsilon;Epsilon-coat protein;cDNA FLJ44512 fis, clone UTERU3001988, highly similar to Homo sapiens coatomer protein complex, subunit epsilon (COPE), transcript variant 2, mRNA;Coatomer protein complex, subunit epsilon, isoform CRA_b;Putative uncharacterized protein COPE;Coatomer protein complex, subunit epsilon, isoform CRA_e	29.326	29.9386	29.4734	30.2958	30.2579	30.2033	30.4793	30.5202	30.5582	+		+		15	11	12	12	12	11	12	13	14	12	74.7	74.7	34.482	0	672990000	1029000000	745400000	8.15797e+08	1318100000	1283900000	1236200000	1279400000	1496900000	1539900000	1581000000	1.53927e+09	0.63764	0.52999	0.831175	15	16	16	20	17	19
2798	Ribonucleoside-diphosphate reductase large subunit;Ribonucleoside-diphosphate reductase subunit M1;Ribonucleotide reductase large subunit	28.1877	28.3016	27.9524	28.9609	28.5992	28.8782	29.0447	28.9018	28.8177	+		+		15	3	5	5	7	8	11	8	10	12	30.3	30.3	90.069	3.362e-201	305740000	330850000	259730000	2.98773e+08	522520000	406640000	493390000	4.74183e+08	553750000	501540000	473130000	5.09473e+08	0.63008	0.586436	0.930732	5	6	5	8	8	13
2876	Aldehyde dehydrogenase 5;Aldehyde dehydrogenase family 1 member B1;Aldehyde dehydrogenase X, mitochondrial	29.0514	29.1677	28.7722	27.8804	28.3226	28.1321	27.5622	27.9972	27.9845	+		+		15	11	10	13	9	7	9	8	9	8	39.8	39.8	57.206	0	556360000	603040000	458440000	539280000	247080000	335700000	294180000	292320000	198180000	267920000	265570000	243890000	1.84483	2.21116	1.19857	17	15	17	12	11	12
4383	93 kDa nucleoporin;Nuclear pore complex protein Nup93;Nucleoporin Nup93;cDNA FLJ32075 fis, clone OCBBF1000146, highly similar to Nuclear pore complex protein Nup93;cDNA FLJ58756, highly similar to Nuclear pore complex protein Nup93	27.6389	27.3883	27.3129	26.1215	26.7111	26.5504	26.1404	26.5806	26.7438	+		+		15	11	10	10	4	5	3	4	5	3	27.7	27.7	93.487	6.7112e-192	208990000	175670000	166720000	1.83793e+08	73008000	109860000	98280000	93716000	73970000	100360000	112380000	95570000	1.96117	1.92313	0.980601	12	11	11	5	6	4
5161	N-acetyltransferase 10	29.04	28.7927	28.9642	26.481	27.6725	27.7418	27.0846	27.4276	27.2694	+		+		15	11	8	12	3	4	4	3	4	3	20.3	20.3	115.73	1.4888e-94	551950000	465010000	523730000	5.13563e+08	93667000	213920000	224450000	1.77346e+08	142320000	180520000	161770000	1.61537e+08	2.89583	3.17924	1.09787	13	11	15	3	4	5
5284	Sideroflexin-1;Tricarboxylate carrier protein	32.4021	32.527	32.4004	33.0342	33.0937	32.7684	32.7711	32.6894	32.8094	+		+		15	13	13	11	12	12	13	11	13	12	60.9	60.9	35.619	0	5675700000	6188600000	5668900000	5844400000	8796200000	9166100000	7315900000	8.42607e+09	7329700000	6926100000	7526800000	7.26087e+09	0.69361	0.804918	1.16048	35	35	37	42	42	44
5755	Zinc finger CCCH domain-containing protein 4	28.1764	28.4263	28.476	27.6705	28.2958	27.7353	27.3542	27.4488	27.4619	+		+		15	11	13	11	8	3	4	5	3	4	20	20	140.26	1.5023e-114	303340000	360710000	373370000	3.45807e+08	213630000	329530000	223430000	255530000	171570000	183200000	184860000	1.79877e+08	1.35329	1.92247	1.42058	11	15	13	8	5	4
1660	Paraspeckle component 1;Paraspeckle protein 1	30.5395	30.9033	31.2184	30.1232	30.6091	29.7419	29.6399	29.7516	29.496	+		+		16	14	14	12	11	13	12	11	11	10	42.3	41.1	58.743	6.4828e-225	1560700000	2008300000	2498400000	2.02247e+09	1169500000	1637800000	897840000	1.23505e+09	836570000	903920000	757160000	832550000	1.63756	2.42924	1.48345	19	26	23	15	20	17
2013	C-terminal LIM domain protein 1;Elfin;LIM domain protein CLP-36;PDZ and LIM domain protein 1	30.4276	30.8197	30.5277	29.9739	29.8858	29.2555	29.7566	29.602	29.7548	+		+		16	14	14	13	13	13	11	13	12	13	72.3	72.3	36.071	6.1302e-219	1444200000	1895200000	1547900000	1629100000	1054500000	992050000	640910000	895820000	907020000	814870000	905930000	875940000	1.81856	1.85983	1.0227	20	21	20	18	18	14
2278	Copine III;Copine-3	30.4052	30.271	30.238	31.1741	30.7139	31.0937	31.2537	30.8579	30.8866	+		+		16	16	15	15	15	15	15	15	15	14	33.9	33.9	60.13	8.0047e-276	1421900000	1295600000	1266300000	1.32793e+09	2422900000	1761200000	2291600000	2.15857e+09	2560300000	1946000000	1985200000	2.16383e+09	0.615192	0.613695	0.997566	24	25	22	25	21	24
2301	Amplified and overexpressed in breast cancer;Breast carcinoma-amplified sequence 1;Novel amplified in breast cancer 1	27.8254	28.3182	26.5861	29.8815	29.9673	29.209	31.1186	30.7626	31.4953	+		+		16	4	5	2	9	8	8	10	12	11	42.1	42.1	61.708	6.2599e-173	237840000	334670000	100740000	2.24417e+08	989100000	1049700000	620560000	8.86453e+08	2331500000	1821700000	3027100000	2.39343e+09	0.253162	0.0937635	0.370369	4	6	2	12	12	9
3540	Interleukin enhancer-binding factor 2;Nuclear factor of activated T-cells 45 kDa	31.6417	30.8001	30.9079	29.9751	29.2496	29.9262	29.6943	29.5489	29.9455	+		+		16	9	11	11	9	9	10	9	6	7	54.4	54.4	43.062	2.6748e-211	3350400000	1869600000	2014700000	2.41157e+09	1055400000	638290000	1020200000	904630000	868720000	785440000	1033900000	896020000	2.6658	2.69142	1.00961	23	18	23	13	13	13
3966	Protein FAM83B	29.8419	29.3869	29.0294	29.2363	29.3178	28.6247	28.3133	28.2342	28.0434	+		+		16	10	13	12	11	13	10	9	9	6	20.2	20.2	114.8	1.5614e-108	962260000	702010000	547930000	737400000	632430000	669150000	413910000	571830000	333540000	315750000	276630000	308640000	1.28954	2.38919	1.85274	12	17	13	11	13	10
4055	Atlastin-3	29.4523	29.4039	29.3874	29.928	29.6568	29.9683	29.7748	30.0264	29.9366	+		+		16	8	11	8	11	12	11	10	11	11	47.1	47.1	60.541	0	734580000	710330000	702260000	7.15723e+08	1021500000	846410000	1050400000	972770000	918550000	1093600000	1027600000	1013250000	0.735758	0.706364	0.960049	8	14	10	14	14	15
4747	38 kDa-splicing factor;Prp8-binding protein;U5 small nuclear ribonucleoprotein 40 kDa protein;U5 snRNP-specific 40 kDa protein;WD repeat-containing protein 57;cDNA FLJ56825, highly similar to WD repeat protein 57	30.126	30.251	29.5054	28.8386	28.3665	28.6606	28.9557	28.7097	28.5908	+		+		16	11	14	10	10	7	6	7	8	8	58.8	58.8	39.31	2.1793e-249	1171700000	1277800000	762100000	1.07053e+09	480060000	346070000	424330000	416820000	520650000	439020000	404280000	454650000	2.56833	2.35463	0.916793	15	16	13	12	9	8
4814	GTP-specific succinyl-CoA synthetase subunit beta;Succinyl-CoA ligase [GDP-forming] subunit beta, mitochondrial;Succinyl-CoA synthetase beta-G chain	30.4029	30.5036	29.9266	29.2485	29.4217	29.3505	29.4287	29.3375	29.4916	+		+		16	11	15	9	9	9	8	9	9	8	50	50	46.51	4.3091e-202	1419700000	1522300000	1020500000	1.32083e+09	637770000	719150000	684530000	6.80483e+08	722660000	678390000	754820000	7.18623e+08	1.94102	1.83801	0.946926	17	23	14	10	11	10
4902	Histone deacetylase complex subunit Sin3a;Paired amphipathic helix protein Sin3a;Transcriptional corepressor Sin3a	29.6531	29.8292	30.1393	28.7598	29.4239	29.1465	29.0311	28.8635	28.8778	+		+		16	10	14	10	9	10	8	6	6	6	16.4	16.4	145.17	4.0432e-165	844250000	953840000	1182600000	9.93563e+08	454530000	720220000	594240000	5.89663e+08	548580000	488410000	493280000	510090000	1.68497	1.94782	1.156	15	17	14	10	14	10
5183	Enhanced at puberty protein 1	29.8569	29.9684	29.7351	30.0864	29.8751	29.8312	29.5075	29.5414	29.5128	+		+		16	11	10	14	12	11	13	11	12	8	34.7	34.7	82.658	1.0241e-198	972360000	1050500000	893610000	9.72157e+08	1140000000	984670000	955180000	1.02662e+09	763200000	781330000	766040000	770190000	0.946952	1.26223	1.33294	12	12	17	14	15	18
1184	3-phosphoadenosine-5-phosphosulfate synthase;Adenosine-5-phosphosulfate 3-phosphotransferase;Adenylylsulfate 3-phosphotransferase;Adenylyl-sulfate kinase;APS kinase;ATP-sulfurylase;Bifunctional 3-phosphoadenosine 5-phosphosulfate synthase 2;Sulfate adenylate transferase;Sulfate adenylyltransferase;Sulfurylase kinase 2	27.6453	27.5505	28.3091	28.3779	28.4708	28.6755	29.1899	29.3815	29.8481	+		+		17	3	4	9	9	9	9	11	11	14	42.2	42.2	69.97	0	209930000	196580000	332580000	2.46363e+08	348820000	372030000	428720000	383190000	612420000	699390000	966460000	7.59423e+08	0.642927	0.324408	0.50458	6	7	15	12	11	12
1385	Mediator of DNA damage checkpoint protein 1;Nuclear factor with BRCT domains 1	28.7545	28.4255	28.6295	27.4589	27.3285	28.1361	27.7552	27.3021	27.4887	+		+		17	8	11	12	5	7	8	8	6	4	13.6	13.6	226.66	1.8826e-103	452870000	360510000	415290000	4.09557e+08	184480000	168540000	294990000	2.16003e+08	226540000	165480000	188330000	193450000	1.89607	2.11712	1.11658	11	15	17	7	9	12
1426	Autoantigen NOR-90;Nucleolar transcription factor 1;Upstream-binding factor 1	30.0311	30.2204	29.5247	28.7509	28.696	29.1144	28.0178	28.1594	28.2369	+		+		17	14	14	13	12	8	12	5	7	5	28.8	28.8	89.405	1.3027e-175	1097100000	1251000000	772340000	1.04015e+09	451730000	434870000	581160000	4.89253e+08	271770000	299790000	316340000	2.95967e+08	2.12599	3.5144	1.65307	18	19	16	12	10	13
1479	BPG-dependent PGAM 1;Phosphoglycerate mutase 1;Phosphoglycerate mutase isozyme B	31.8166	32.415	32.6147	33.5426	33.5657	33.4348	33.8005	34.0092	34.0932	+		+		17	12	15	13	14	14	14	15	12	14	74	74	28.85	0	3782300000	5726600000	6576700000	5.36187e+09	12512000000	12714000000	11611000000	12279000000	14961000000	17290000000	18326000000	16859000000	0.43667	0.318042	0.728335	29	34	39	45	58	52
2230	Cancer/testis antigen 89;C-Jun-amino-terminal kinase-interacting protein 4;Human lung cancer oncogene 6 protein;JNK-associated leucine-zipper protein;Mitogen-activated protein kinase 8-interacting protein 4;Proliferation-inducing protein 6;Protein highly expressed in testis;Sperm surface protein;Sperm-associated antigen 9;Sperm-specific protein;Sunday driver 1	27.8581	28.0591	28.1372	28.6037	28.4297	28.5358	28.6657	28.976	28.7584	+		+		17	6	7	8	9	8	8	12	13	10	20.4	20.4	144.68	3.5699e-244	243290000	279670000	295210000	2.72723e+08	407920000	361560000	389170000	3.86217e+08	425820000	528000000	454080000	469300000	0.706141	0.581128	0.822963	7	9	8	10	8	8
2367	Signal recognition particle 72 kDa protein	27.908	27.9501	28.0408	28.7005	28.3462	28.7378	28.4765	28.5153	28.7057	+		+		17	7	12	9	12	8	14	12	13	10	34.1	34.1	74.605	0	251850000	259300000	276130000	2.62427e+08	436230000	341230000	447640000	4.08367e+08	373480000	383670000	437790000	3.98313e+08	0.642625	0.658845	1.02524	8	14	12	15	12	19
2536	Nucleolar phosphoprotein B23;Nucleolar protein NO38;Nucleophosmin;Numatrin;Nucleophosmin (Nucleolar phosphoprotein B23, numatrin);Nucleophosmin/B23.2	34.8751	34.848	35.0256	33.7404	34.4069	33.808	34.2771	33.9634	33.8784	+		+		17	10	12	12	8	8	9	10	11	13	54.1	54.1	32.575	0	31509000000	30924000000	34976000000	3.24697e+10	14351000000	22777000000	15039000000	17389000000	20818000000	16750000000	15791000000	1.77863e+10	1.86725	1.82554	0.977661	190	151	232	111	111	105
3695	Lung resistance-related protein;Major vault protein	26.8206	27.4814	27.645	27.7165	28.1526	28.4711	28.8528	28.8301	28.9048	+		+		17	4	3	4	6	6	7	7	12	10	33.4	33.4	99.326	1.3275e-69	118520000	187380000	209880000	1.71927e+08	220550000	298380000	372090000	2.97007e+08	484780000	477230000	502590000	488200000	0.578865	0.352164	0.608371	4	4	6	8	7	8
3748	Alpha-CP1;Heterogeneous nuclear ribonucleoprotein E1;Nucleic acid-binding protein SUB2.3;Poly(rC)-binding protein 1	32.2556	32.1572	32.52	32.8784	32.7767	32.8642	32.9479	32.8994	33.0719	+		+		17	15	12	14	15	14	16	14	16	16	80.1	80.1	37.497	0	5127600000	4789300000	6158800000	5.35857e+09	7895600000	7358200000	7818400000	7.69073e+09	8285300000	8011400000	9028900000	8.44187e+09	0.696756	0.634761	0.911023	33	32	42	47	31	48
3756	Protein transport protein Sec23B;SEC23-related protein B	27.4447	27.2294	27.7906	28.3356	28.2286	28.7899	28.3412	28.6277	28.4276	+		+		17	5	8	7	11	10	8	11	11	9	40.8	37.9	86.478	6.01e-250	182670000	157350000	232170000	190730000	338740000	314530000	464110000	372460000	340050000	414770000	361040000	3.71953e+08	0.512082	0.512779	1.00136	5	10	9	14	12	12
3770	Mammalian branch point-binding protein;Splicing factor 1;Transcription factor ZFM1;Zinc finger gene in MEN1 locus;Zinc finger protein 162;Putative uncharacterized protein SF1;cDNA FLJ54064, highly similar to Splicing factor 1	30.9556	31.2907	31.2758	30.7275	30.5864	30.3654	30.1312	30.2443	30.0353	+		+		17	10	15	12	9	11	12	13	13	10	43.8	43.8	61.888	2.3379e-227	2082400000	2626900000	2599900000	2436400000	1777900000	1612200000	1383200000	1591100000	1176000000	1271900000	1100300000	1.18273e+09	1.53127	2.05997	1.34527	18	27	26	19	20	21
4380	Deleted in breast cancer gene 1 protein;p30 DBC;Protein KIAA1967	30.0766	29.7679	29.5245	29.0225	29.0601	29.0737	28.8594	28.9954	28.8885	+		+		17	13	14	12	10	11	14	11	12	10	24.3	24.3	102.9	0	1132300000	914160000	772270000	9.39577e+08	545320000	559710000	565000000	5.56677e+08	487010000	535160000	496950000	5.06373e+08	1.68783	1.8555	1.09934	17	16	17	12	14	16
4963	ElaC homolog protein 2;Heredity prostate cancer protein 2;Ribonuclease Z 2;tRNA 3 endonuclease 2;tRNase Z 2;Zinc phosphodiesterase ELAC protein 2;cDNA FLJ59369, highly similar to Zinc phosphodiesterase ELAC protein 2 (EC 3.1.26.11)	28.5653	28.6808	28.7866	28.0709	28.1707	28.3678	28.0998	27.8661	27.7651	+		+		17	10	10	12	8	7	9	7	6	6	35	35	92.218	8.5766e-151	397200000	430310000	463040000	4.30183e+08	281950000	302160000	346390000	3.10167e+08	287660000	244640000	228100000	2.53467e+08	1.38694	1.6972	1.2237	11	13	14	10	8	10
5753	E3 ubiquitin-protein ligase TRIM33;Ectodermin homolog;RET-fused gene 7 protein;Transcription intermediary factor 1-gamma;Tripartite motif-containing protein 33	29.2302	29.1474	29.0184	28.975	28.6705	28.8425	28.6214	28.6068	28.6132	+		+		17	12	11	7	10	14	11	12	8	10	20.2	20.2	122.53	0	629740000	594620000	543760000	5.89373e+08	527650000	427250000	481360000	4.78753e+08	412940000	408790000	410610000	410780000	1.23106	1.43477	1.16547	15	13	10	13	16	13
707	cDNA FLJ61698, highly similar to Golgi apparatus protein 1;CFR-1;Cysteine-rich fibroblast growth factor receptor;E-selectin ligand 1;Golgi apparatus protein 1;Golgi sialoglycoprotein MG-160	29.1703	29.0085	28.901	29.8666	29.4988	29.5097	29.7029	29.5069	29.4929	+		+		18	15	11	9	15	9	9	12	16	9	20.7	20.7	137.22	0	604160000	540050000	501270000	5.48493e+08	978940000	758600000	764360000	8.33967e+08	873880000	762900000	755500000	7.97427e+08	0.657692	0.687829	1.04582	18	12	9	17	11	12
1596	Beige-like protein;CDC4-like protein;Lipopolysaccharide-responsive and beige-like anchor protein	28.5578	28.3849	28.2208	29.1621	28.9552	29.3741	28.8248	28.8526	28.9333	+		+		18	6	6	8	11	9	9	9	11	9	8.3	8.3	317.79	4.0795e-72	395140000	350520000	312840000	3.52833e+08	600700000	520450000	695800000	605650000	475460000	484720000	512610000	490930000	0.58257	0.718704	1.23368	7	6	8	13	11	12
3293	Heterogeneous nuclear ribonucleoprotein K	33.5116	33.5266	33.4324	32.9952	33.182	32.8362	32.9271	32.7228	32.8753	+		+		18	17	17	15	15	17	17	16	15	14	39.8	39.8	48.562	0	12246000000	12374000000	11592000000	1.20707e+10	8561200000	9744800000	7667700000	8657900000	8166400000	7088200000	7878400000	7711000000	1.39418	1.56538	1.1228	103	119	110	53	71	68
4013	Regulation of nuclear pre-mRNA domain-containing protein 2	30.0318	30.2173	30.0548	29.5372	29.6764	29.8213	29.1428	29.3479	29.1363	+		+		18	15	15	16	11	14	13	13	11	9	24.3	24.3	156.02	0	1097700000	1248300000	1115300000	1.15377e+09	779060000	857980000	948640000	8.61893e+08	592750000	683300000	590060000	6.22037e+08	1.33864	1.85482	1.3856	20	20	20	15	16	16
4115	Aspartate--tRNA ligase;Aspartyl-tRNA synthetase, mitochondrial	30.1411	30.1486	29.5115	28.7081	28.7972	29.0487	28.6081	28.8891	28.8559	+		+		18	16	15	11	11	7	9	7	6	7	41.4	41.4	73.562	3.0194e-280	1184100000	1190200000	765320000	1046540000	438520000	466460000	555310000	4.86763e+08	409160000	497150000	485840000	464050000	2.15	2.25523	1.04895	21	19	13	14	9	11
2249	Lysyl hydroxylase 3;Procollagen-lysine,2-oxoglutarate 5-dioxygenase 3	29.7847	29.7868	29.4196	29.971	29.905	30.0562	30.6204	30.3905	30.5231	+		+		19	13	15	13	16	13	16	18	17	15	38.8	38.8	84.784	8.1566e-239	924870000	926250000	718090000	8.56403e+08	1052400000	1005300000	1116400000	1.05803e+09	1650700000	1407500000	1543000000	1.53373e+09	0.809429	0.558378	0.689842	17	19	18	20	16	20
2830	ERT2;Extracellular signal-regulated kinase 1;Insulin-stimulated MAP2 kinase;MAP kinase isoform p44;Microtubule-associated protein 2 kinase;Mitogen-activated protein kinase 1;Mitogen-activated protein kinase 3;p44-ERK1;cDNA FLJ33690 fis, clone BRAWH2002967, highly similar to Mitogen-activated protein kinase 3 (EC 2.7.11.24);Mitogen-activated protein kinase 3, isoform CRA_b	29.2809	28.9665	29.1141	30.5389	30.0288	29.9201	30.5408	30.3253	29.8931	+		+		19	9	9	11	15	15	12	14	13	12	51.5	51.5	43.135	3.941e-152	652250000	524560000	581040000	585950000	1560000000	1095400000	1015900000	1.22377e+09	1562100000	1345300000	997080000	1.30149e+09	0.478809	0.450214	0.940279	11	11	12	23	17	16
3008	DNA mismatch repair protein Msh2;MutS protein homolog 2;cDNA FLJ51193, highly similar to DNA mismatch repair protein Msh2;cDNA FLJ57316, highly similar to DNA mismatch repair protein Msh2;cDNA FLJ51069, highly similar to DNA mismatch repair protein Msh2	27.9221	27.685	27.7013	27.4636	27.5505	27.7036	27.2662	27.2498	27.3799	+		+		19	13	12	11	9	9	13	7	10	9	26.8	26.8	104.74	1.2496e-213	254330000	215780000	218230000	2.29447e+08	185080000	196570000	218590000	200080000	161410000	159590000	174650000	1.65217e+08	1.14677	1.38876	1.21102	16	15	12	11	11	15
4908	Meg-3;Niban-like protein 1;Protein FAM129B	30.1023	30.1586	30.0106	30.3282	30.0461	30.4326	30.6589	30.8169	31.0283	+		+		19	14	13	12	13	13	16	14	16	17	40.3	40.3	84.137	0	1152600000	1198500000	1081700000	1.14427e+09	1348000000	1108600000	1449200000	1.30193e+09	1695300000	1891500000	2190000000	1925600000	0.878898	0.594239	0.676118	21	19	21	24	17	25
501	Complex I-75kD;NADH-ubiquinone oxidoreductase 75 kDa subunit, mitochondrial;cDNA FLJ53201, highly similar to NADH-ubiquinone oxidoreductase 75 kDa subunit, mitochondrial (EC 1.6.5.3);cDNA FLJ55879, highly similar to NADH-ubiquinone oxidoreductase 75 kDa subunit, mitochondrial (EC 1.6.5.3);cDNA FLJ60586, highly similar to NADH-ubiquinone oxidoreductase 75 kDa subunit, mitochondrial (EC 1.6.5.3)	30.3453	30.3335	30.0811	29.7849	29.9141	30.0268	29.8801	29.751	29.8092	+		+		20	15	16	14	11	8	15	14	14	11	36.5	36.5	79.467	7.5692e-233	1364100000	1353000000	1135800000	1284300000	925000000	1011700000	1093900000	1010200000	988080000	903530000	940730000	9.44113e+08	1.27133	1.36032	1.07	21	19	17	14	10	18
2274	Actin-interacting protein 1;NORI-1;WD repeat-containing protein 1;Putative uncharacterized protein WDR1;cDNA FLJ58303, highly similar to WD repeat protein 1	31.0337	31.2823	31.2682	31.4417	31.1453	31.3824	31.7185	31.7589	31.612	+		+		20	14	14	15	16	14	16	17	18	15	48	48	66.193	0	2198300000	2611700000	2586300000	2.46543e+09	2916700000	2375000000	2799200000	2.69697e+09	3533700000	3634000000	3282200000	3483300000	0.91415	0.707787	0.774256	22	22	22	24	20	22
3489	Natural killer cell-enhancing factor A;Peroxiredoxin-1;Proliferation-associated gene protein;Thioredoxin peroxidase 2;Thioredoxin-dependent peroxide reductase 2	34.1893	34.0542	34.4392	34.9262	35.1502	34.8143	35.1261	35.058	35.1016	+		+		20	14	17	15	16	15	16	17	19	15	86.9	86.9	22.11	0	19588000000	17838000000	23293000000	2.02397e+10	32646000000	38130000000	30209000000	3.36617e+10	37499000000	35769000000	36868000000	36712000000	0.601268	0.551309	0.916912	86	73	105	144	112	103
4807	Dehydrogenase E1 and transketolase domain-containing protein 1;Probable 2-oxoglutarate dehydrogenase E1 component DHKTD1, mitochondrial	30.7192	30.9061	30.569	30.2964	29.6811	30.2364	29.5831	29.4633	30.0072	+		+		20	10	13	12	10	10	9	7	9	9	38.3	38.3	103.08	3.2987e-266	1767700000	2012100000	1592900000	1790900000	1318600000	860820000	1264900000	1.14811e+09	804250000	740160000	1079100000	8.74503e+08	1.55987	2.04791	1.31287	17	19	15	14	10	12
715	Glycine hydroxymethyltransferase;Serine hydroxymethyltransferase, mitochondrial;Serine methylase;Serine hydroxymethyltransferase;cDNA FLJ58585, highly similar to Serine hydroxymethyltransferase, mitochondrial (EC 2.1.2.1);Serine hydroxymethyltransferase 2 (Mitochondrial), isoform CRA_h	33.7445	33.758	33.5365	33.1738	33.3544	33.0526	33.0986	33.0329	33.1029	+		+		21	15	21	17	16	17	18	17	15	18	53.2	53.2	55.992	0	14392000000	14527000000	12459000000	1.37927e+10	9689500000	10982000000	8909200000	9.86023e+09	9197700000	8788000000	9225300000	9.07033e+09	1.39882	1.52064	1.08709	54	58	51	43	37	45
2502	Ornithine aminotransferase, hepatic form;Ornithine aminotransferase, mitochondrial;Ornithine aminotransferase, renal form;Ornithine delta-aminotransferase;Ornithine--oxo-acid aminotransferase;cDNA FLJ57880, highly similar to Ornithine aminotransferase, mitochondrial (EC 2.6.1.13);cDNA, FLJ78846, highly similar to Ornithine aminotransferase, mitochondrial (EC 2.6.1.13);Putative uncharacterized pro…	29.535	30.1898	28.9296	30.8234	30.8287	30.9275	31.2944	31.2043	31.2657	+		+		21	11	9	11	15	14	15	19	17	17	59	59	48.534	3.2897e-263	777900000	1224700000	511310000	837970000	1900100000	1907100000	2042200000	1949800000	2633600000	2474100000	2581800000	2.56317e+09	0.429772	0.326928	0.7607	11	12	10	22	21	22
2826	Threonine--tRNA ligase;Threonyl-tRNA synthetase, cytoplasmic;cDNA FLJ53464, highly similar to Threonyl-tRNA synthetase, cytoplasmic (EC 6.1.1.3)	31.271	31.0513	30.8555	30.5463	30.4765	30.56	30.2869	30.4412	30.4812	+		+		21	18	18	17	15	13	15	11	15	11	38	38	83.434	1.8456e-250	2591300000	2225200000	1942800000	2253100000	1568000000	1494000000	1583000000	1.54833e+09	1310000000	1457900000	1498800000	1.42223e+09	1.45518	1.5842	1.08866	23	20	21	17	15	18
5316		27.8619	28.1662	27.8241	28.3219	28.4541	28.7806	28.7053	28.8328	29.023	+		+		21	7	10	9	10	11	12	11	16	12	21.4	21.4	141.72	4.5608e-290	243930000	301210000	237630000	2.60923e+08	335530000	367750000	461120000	3.88133e+08	437680000	478130000	545500000	4.87103e+08	0.672252	0.535663	0.796819	7	10	9	12	12	14
3095	153 kDa nucleoporin;Nuclear pore complex protein Nup153;Nucleoporin Nup153;NUP153 variant protein	28.8338	28.8359	29.0624	28.3944	28.6676	28.3959	28.0931	27.9392	28.3145	+		+		22	15	17	14	9	9	9	11	8	7	24.3	24.3	153.94	0	478440000	479150000	560610000	5.06067e+08	352840000	426380000	353190000	377470000	286320000	257360000	333810000	2.92497e+08	1.34068	1.73016	1.29051	19	22	19	8	10	11
1088	Dynamin-like 120 kDa protein, form S1;Dynamin-like 120 kDa protein, mitochondrial;Optic atrophy protein 1	30.542	30.5897	30.3202	29.1687	29.6254	29.724	29.8252	29.7039	29.9087	+		+		23	14	19	16	6	10	12	12	11	13	30.1	30.1	117.74	0	1563400000	1615900000	1340600000	1.50663e+09	603450000	828210000	886810000	7.72823e+08	951190000	874490000	1007900000	9.44527e+08	1.94952	1.59512	0.818212	19	24	21	7	11	14
1833	Tight junction protein 1;Tight junction protein ZO-1;Zona occludens protein 1;Zonula occludens protein 1	28.9614	29.7563	29.3824	27.4935	25.8392	27.1337	26.6065	24.7666	26.402	+		+		23	14	15	14	6	4	6	4	2	3	20.7	20.7	197.46	6.5069e-122	522700000	906830000	699840000	709790000	188960000	60033000	147250000	132081000	102180000	28543000	88675000	7.31327e+07	5.3739	9.70551	1.80605	16	19	18	7	4	7
2229	Sucrose nonfermenting protein 2 homolog;SWI/SNF-related matrix-associated actin-dependent regulator of chromatin subfamily A member 5	30.0194	29.9035	29.6854	28.677	29.2402	29.1245	28.7711	28.7568	28.6697	+		+		23	14	19	13	12	9	10	10	11	9	27.4	27.4	121.9	1.8405e-201	1088300000	1004300000	863360000	985320000	429170000	634130000	585250000	5.49517e+08	458100000	453580000	427010000	446230000	1.79307	2.2081	1.23147	19	23	17	13	10	12
3018	Deubiquitinating enzyme 5;Isopeptidase T;Ubiquitin carboxyl-terminal hydrolase 5;Ubiquitin thioesterase 5;Ubiquitin-specific-processing protease 5	31.4719	31.2603	31.317	31.6758	31.6325	31.8914	31.811	31.7665	31.8009	+		+		23	17	16	16	15	15	18	16	17	19	39.9	39.9	95.785	0	2978500000	2572100000	2675300000	2.74197e+09	3430500000	3329100000	3983600000	3.58107e+09	3767600000	3653200000	3741400000	3.72073e+09	0.765684	0.736943	0.962463	27	25	25	22	23	26
3139	C1 factor;CFF;HCF C-terminal chain 1;HCF C-terminal chain 2;HCF C-terminal chain 3;HCF C-terminal chain 4;HCF C-terminal chain 5;HCF C-terminal chain 6;HCF N-terminal chain 1;HCF N-terminal chain 2;HCF N-terminal chain 3;HCF N-terminal chain 4;HCF N-terminal chain 5;HCF N-terminal chain 6;Host cell factor 1;VCAF;VP16 accessory protein;Putative uncharacterized protein HCFC1	29.278	29.5957	29.5571	28.9605	28.8392	29.0218	28.6612	28.7819	28.9092	+		+		23	15	17	17	14	11	10	12	13	12	19.3	19.3	208.73	0	650940000	811330000	789910000	7.50727e+08	522370000	480260000	545050000	5.15893e+08	424510000	461540000	504130000	4.63393e+08	1.4552	1.62006	1.11329	24	32	34	30	21	22
4551	Nuclear envelope pore membrane protein POM 210;Nuclear pore membrane glycoprotein 210;Nucleoporin Nup210;Pore membrane protein of 210 kDa	29.8817	29.6196	29.1863	28.2523	28.0202	28.5273	27.9935	28.2436	28.0168	+		+		23	18	17	15	10	7	6	7	6	5	19	19	205.11	1.3594e-244	989220000	824890000	610870000	8.08327e+08	319740000	272210000	386890000	326280000	267230000	317810000	271580000	285540000	2.4774	2.83087	1.14268	18	18	16	10	7	7
2523	La autoantigen;La ribonucleoprotein;Lupus La protein;Sjoegren syndrome type B antigen	31.7268	32.0247	31.9817	31.4879	31.2701	31.6113	31.2875	31.2315	31.369	+		+		24	14	22	18	11	15	14	13	15	14	55.4	55.4	46.836	6.4333e-292	3554000000	4369200000	4240900000	4054700000	3011600000	2589700000	3280500000	2960600000	2621100000	2521300000	2773300000	2.63857e+09	1.36955	1.53671	1.12205	35	39	39	19	24	23
3011	Nicotinamide phosphoribosyltransferase;Pre-B-cell colony-enhancing factor 1;Visfatin;Novel protein similar to Pre-B cell enhancing factor (PBEF)	29.9392	29.9276	30.2057	30.5421	30.4938	30.784	30.9657	30.716	31.2381	+		+		24	13	14	13	14	12	17	19	16	15	57.6	57.6	55.52	3.9209e-292	1029400000	1021200000	1238300000	1096300000	1563500000	1512000000	1848900000	1.64147e+09	2097000000	1763800000	2532800000	2131200000	0.667878	0.514405	0.770208	17	19	22	21	23	25
3088	Nuclear protein ZAP3;YLP motif-containing protein 1;ZAP113	29.5203	30.0279	30.179	29.0464	29.3433	28.8086	28.7387	28.5476	28.1487	+		+		24	11	15	20	8	11	7	8	10	5	19.5	19.5	241.64	0	770030000	1094700000	1215600000	1.02678e+09	554400000	681120000	470180000	5.68567e+08	447930000	392350000	297580000	3.79287e+08	1.8059	2.70713	1.49904	14	20	25	9	13	8
3173	96 kDa nucleoporin;98 kDa nucleoporin;Nuclear pore complex protein Nup96;Nuclear pore complex protein Nup98;Nuclear pore complex protein Nup98-Nup96;Nucleoporin Nup96;Nucleoporin Nup98	28.0045	28.4341	28.0065	27.1993	27.6482	27.1034	26.8631	27.195	26.9204	+		+		24	13	17	12	7	6	7	4	6	8	18.3	18.3	197.58	1.6067e-291	269270000	362680000	269650000	3.00533e+08	154100000	210350000	144190000	1.69547e+08	122070000	153640000	127010000	134240000	1.77257	2.23878	1.26301	13	19	12	7	6	7
2494	Catalase	32.297	32.4203	31.8323	31.6622	31.6977	31.2144	31.1672	31.1403	31.0528	+		+		25	22	23	21	20	20	18	19	20	19	55.8	55.8	59.755	0	5276800000	5747700000	3823700000	4949400000	3398400000	3483100000	2491500000	3.12433e+09	2411400000	2366800000	2227600000	2.33527e+09	1.58415	2.11942	1.33789	34	43	33	29	33	26
3839	HBEBP2-binding protein C;Inverted formin-2	29.2011	29.2736	29.3583	29.4189	29.5817	29.668	29.6309	29.6843	29.7744	+		+		25	11	15	13	11	8	12	10	16	14	30.3	30.3	135.62	0	617160000	648980000	688210000	651450000	717750000	803500000	853040000	791430000	831340000	862720000	918290000	8.70783e+08	0.82313	0.74812	0.908871	14	17	15	13	12	15
5212	Activity-dependent neuroprotective protein;Activity-dependent neuroprotector homeobox protein	30.2231	30.1587	30.3126	29.7458	30.0898	29.4944	29.1821	28.9367	28.965	+		+		25	18	20	20	16	18	12	13	11	10	31.7	31.7	123.56	2.4023e-231	1253300000	1198600000	1333500000	1261800000	900270000	1142700000	756320000	9.33097e+08	609110000	513840000	523990000	548980000	1.35227	2.29844	1.69969	30	30	30	22	24	18
2547	Calcium-activated neutral proteinase 1;Calpain mu-type;Calpain-1 catalytic subunit;Calpain-1 large subunit;Cell proliferation-inducing gene 30 protein;Micromolar-calpain	30.8294	30.3281	30.5219	31.4952	31.2145	31.3565	31.3511	31.3169	31.1683	+		+		26	16	15	16	20	18	20	19	19	16	37.7	37.7	81.889	0	1908000000	1347900000	1541700000	1599200000	3027000000	2491700000	2749400000	2.75603e+09	2739100000	2675100000	2413200000	2.60913e+09	0.580254	0.612924	1.0563	27	25	25	34	26	34
3750	Pre-mRNA-splicing factor SF3b 130 kDa subunit;Spliceosome-associated protein 130;Splicing factor 3B subunit 3;STAF130	32.0687	31.5545	31.5575	30.7974	30.7614	30.9655	30.7883	30.7078	30.7023	+		+		26	23	20	22	19	15	19	17	18	17	26.5	26.5	135.58	0	4504300000	3154000000	3160500000	3.60627e+09	1866100000	1820100000	2096800000	1.92767e+09	1854400000	1753700000	1747100000	1.78507e+09	1.87079	2.02024	1.07988	39	32	35	25	22	28
1709	Aspartate carbamoyltransferase;CAD protein;Dihydroorotase;Glutamine-dependent carbamoyl-phosphate synthase	29.0991	29.0049	28.7927	28.267	28.1191	28.4977	27.9672	28.2575	28.0397	+		+		27	19	16	17	13	14	17	17	15	14	19.2	19.2	242.98	1.8516e-282	575060000	538700000	465020000	526260000	323010000	291530000	379010000	3.31183e+08	262400000	320890000	275920000	2.86403e+08	1.58903	1.83748	1.15635	22	17	21	14	15	18
4289	ATP-dependent RNA helicase DDX42;DEAD box protein 42;RNA helicase-like protein;RNA helicase-related protein;SF3b DEAD box protein;Splicing factor 3B-associated 125 kDa protein	29.9197	29.9822	29.5755	28.628	28.9577	29.1685	28.7088	28.6809	28.9349	+		+		27	18	23	13	8	9	11	10	11	8	42.4	42.4	102.97	0	1015600000	1060600000	800030000	9.58743e+08	414840000	521340000	603390000	513190000	438740000	430350000	513170000	4.60753e+08	1.8682	2.08082	1.11381	19	30	15	8	10	13
1930	Deubiquitinating enzyme 7;Herpesvirus-associated ubiquitin-specific protease;Ubiquitin carboxyl-terminal hydrolase 7;Ubiquitin thioesterase 7;Ubiquitin-specific-processing protease 7;Ubiquitin carboxyl-terminal hydrolase	29.678	29.6908	29.6449	29.1551	29.0279	29.3808	28.958	28.9913	29.2208	+		+		28	15	17	18	14	13	15	13	12	15	35.9	35.9	128.91	3.4167e-263	858960000	866590000	839480000	855010000	597820000	547350000	699030000	6.14733e+08	521470000	533630000	625640000	5.60247e+08	1.39086	1.52613	1.09725	19	25	24	16	13	19
1266	150 kDa dynein-associated polypeptide;DAP-150;Dynactin subunit 1;p135;p150-glued;Putative uncharacterized protein DCTN1	29.6909	29.2417	29.3959	30.1939	29.952	30.3296	30.3677	30.1818	30.2847	+		+		29	8	8	5	11	12	18	15	17	13	33.9	33.9	139.09	9.1685e-185	866660000	634800000	706400000	7.35953e+08	1228200000	1038600000	1349300000	1.20537e+09	1385400000	1217900000	1308000000	1.30377e+09	0.610564	0.564482	0.924526	9	9	8	14	13	21
1669	ATP-dependent RNA helicase #46;DEAH box protein 15;Putative pre-mRNA-splicing factor ATP-dependent RNA helicase DHX15	30.7441	30.5926	30.6426	30.4539	30.1385	30.0844	30.0152	29.8536	29.984	+		+		29	21	21	22	19	18	19	17	17	16	42.3	42.3	90.932	0	1798400000	1619200000	1676300000	1.69797e+09	1470700000	1181900000	1138400000	1.26367e+09	1085100000	970140000	1061900000	1.03905e+09	1.34368	1.63416	1.21618	30	28	33	25	24	24
2730	Metavinculin;Vinculin	28.8923	29.1972	29.2814	29.7364	29.5206	29.92	29.8487	29.9113	29.935	+		+		29	17	13	20	22	22	23	26	18	21	37.4	37.4	123.8	0	498260000	615490000	652500000	588750000	894430000	770150000	1015800000	893460000	966820000	1009700000	1026400000	1.00097e+09	0.658955	0.588178	0.892591	19	21	27	29	28	35
3077	Elongation factor Tu, mitochondrial;P43	34.0526	34.2123	33.9661	33.8258	33.6297	33.3536	33.5352	33.3339	33.1926	+		+		29	22	26	24	24	22	24	23	22	22	63.9	63.9	49.541	0	17818000000	19904000000	16781000000	1.81677e+10	15226000000	13291000000	10976000000	1.31643e+10	12448000000	10827000000	9816800000	11030600000	1.38007	1.64702	1.19344	46	49	49	43	37	39
3365	Elongation factor 1-alpha 1;Elongation factor Tu;Eukaryotic elongation factor 1 A-1;Leukocyte receptor cluster member 7;Eukaryotic elongation factor 1 A-like 3;Putative elongation factor 1-alpha-like 3;Elongation factor 1-alpha	34.3055	34.1168	34.4759	34.8493	34.9578	35.1518	35.1403	35.028	35.1122	+		+		29	18	23	26	24	23	25	22	23	24	72.7	72.7	50.14	0	21232000000	18628000000	23893000000	21251000000	30952000000	33370000000	38173000000	34165000000	37870000000	35034000000	37139000000	36681000000	0.622011	0.579346	0.931409	551	408	629	647	653	721
958	Cadherin-associated Src substrate;Catenin delta-1;p120 catenin;p120(cas);Putative uncharacterized protein CTNND1	31.1132	31.3198	31.275	30.9622	30.8791	30.6749	30.8893	30.6735	30.8364	+		+		30	21	26	21	19	17	20	17	17	17	43.4	43.4	108.17	0	2322700000	2680400000	2598500000	2.53387e+09	2092000000	1974800000	1714200000	1927000000	1988900000	1712500000	1917300000	1872900000	1.31493	1.35291	1.02889	38	36	32	28	26	28
3595	Pre-mRNA-splicing factor SF3b 145 kDa subunit;SF3b150;Spliceosome-associated protein 145;Splicing factor 3B subunit 2	31.2112	31.6297	31.3386	30.6685	30.7308	30.8564	30.453	30.4917	30.6068	+		+		31	16	27	22	15	13	15	13	18	15	44.5	44.5	100.23	0	2486100000	3322600000	2715600000	2.84143e+09	1706600000	1781900000	1944100000	1.81087e+09	1469800000	1509800000	1635200000	1.53827e+09	1.5691	1.84717	1.17721	21	34	27	18	17	22
4947	Aconitate hydratase, mitochondrial;Citrate hydro-lyase;Aconitase 2, mitochondrial;cDNA FLJ50886, highly similar to Aconitate hydratase, mitochondrial(EC 4.2.1.3)	32.4413	32.4962	32.2054	32.1426	32.1697	32.0853	31.9789	31.8494	31.8329	+		+		31	24	24	23	26	25	24	24	28	23	56.2	56.2	85.424	0	5831800000	6057900000	4952000000	5613900000	4741300000	4831000000	4556700000	4.70967e+09	4232700000	3869100000	3825300000	3975700000	1.192	1.41205	1.18461	39	45	42	44	39	40
669	75 kDa glucose-regulated protein;Heat shock 70 kDa protein 9;Mortalin;Peptide-binding protein 74;Stress-70 protein, mitochondrial;cDNA FLJ51907, highly similar to Stress-70 protein, mitochondrial	33.8228	34.0266	33.9109	33.125	33.4878	33.5268	33.4375	33.576	33.5096	+		+		32	24	27	26	24	24	25	23	25	22	54.5	54.5	73.68	0	15194000000	17500000000	16151000000	1.62817e+10	9367600000	12046000000	12376000000	11263200000	11633000000	12805000000	12229000000	1.22223e+10	1.44556	1.33212	0.921526	70	93	103	63	74	73
2930	Beta-coat protein;Coatomer subunit beta;p102;cDNA FLJ56271, highly similar to Coatomer subunit beta;Coatomer protein complex, subunit beta 2 (Beta prime), isoform CRA_b	30.5334	30.3477	30.3731	31.2272	30.8309	30.8128	30.8328	30.8664	30.9212	+		+		32	21	20	18	25	24	25	24	23	25	53.1	53.1	102.49	0	1554100000	1366400000	1390600000	1.43703e+09	2513800000	1910000000	1886100000	2103300000	1912500000	1957500000	2033300000	1.96777e+09	0.683228	0.730286	1.06888	26	26	28	32	34	36
3421	High density lipoprotein-binding protein;Vigilin	30.0076	30.1016	30.111	30.4099	30.4065	30.6448	30.504	30.4512	30.572	+		+		34	11	22	21	17	22	24	22	24	21	35.1	35.1	141.45	0	1079400000	1152100000	1159600000	1.13037e+09	1426600000	1423200000	1678800000	1.50953e+09	1522700000	1468000000	1596200000	1.52897e+09	0.748819	0.739301	0.98729	13	27	25	20	26	30
2543	Cellular thyroid hormone-binding protein;p55;Prolyl 4-hydroxylase subunit beta;Protein disulfide-isomerase;cDNA FLJ59430, highly similar to Protein disulfide-isomerase (EC 5.3.4.1)	33.7243	34.134	34.2666	34.6621	34.7936	34.7895	35.0688	34.8984	34.9903	+		+		35	26	25	30	28	26	26	30	27	30	62.4	62.4	57.116	0	14191000000	18852000000	20667000000	1.79033e+10	27186000000	29779000000	29694000000	2.88863e+10	36037000000	32022000000	34130000000	34063000000	0.619786	0.525595	0.848027	78	69	94	115	82	90
2525	Cell proliferation-inducing gene 46 protein;Cytokeratin-18;Keratin, type I cytoskeletal 18;Keratin-18	35.5067	35.2993	35.5338	34.792	35.0901	34.8291	34.8614	35.0976	34.8385	+		+		36	30	31	26	25	23	23	25	24	23	80	76.3	48.057	0	48817000000	42281000000	49745000000	4.69477e+10	29746000000	36573000000	30522000000	3.22803e+10	31212000000	36765000000	30721000000	3.28993e+10	1.45437	1.42701	0.981185	384	411	578	239	315	321
3502	ATP-dependent RNA helicase A;DEAH box protein 9;Nuclear DNA helicase II	32.6062	32.0227	32.1365	31.641	31.421	31.3999	31.2624	31.2525	30.993	+		+		38	31	31	28	27	27	24	24	25	19	36.1	36.1	140.96	0	6537900000	4363200000	4721100000	5207400000	3348800000	2875200000	2833400000	3.01913e+09	2575900000	2558300000	2137100000	2.42377e+09	1.7248	2.14847	1.24564	51	53	53	44	42	39
3096	358 kDa nucleoporin;E3 SUMO-protein ligase RanBP2;Nuclear pore complex protein Nup358;Nucleoporin Nup358;p270;Ran-binding protein 2	29.6827	29.989	29.8556	29.4354	29.4439	29.474	29.1817	29.0666	29.0754	+		+		41	22	27	21	17	15	14	16	11	8	19.5	19.5	358.2	0	861760000	1065600000	971440000	9.66267e+08	726020000	730280000	745700000	734000000	608910000	562220000	565670000	5.78933e+08	1.31644	1.66905	1.26785	26	30	25	20	17	17
1500	ATP-dependent helicase CHD4;Chromodomain-helicase-DNA-binding protein 4;Mi-2 autoantigen 218 kDa protein;Mi2-beta	31.0434	30.7584	30.529	30.1655	30.1725	30.2272	30.0271	29.795	29.7887	+		+		42	30	31	27	28	24	23	20	16	14	28.3	28.3	220.85	0	2213100000	1816300000	1549300000	1.85957e+09	1204300000	1210100000	1256900000	1.22377e+09	1094100000	931510000	927430000	9.84347e+08	1.51954	1.88914	1.24323	41	41	36	35	29	27
3184	Alpha-coat protein;Coatomer subunit alpha;HEP-COP;Proxenin;Xenin;Xenopsin-related peptide	30.8384	30.7337	30.7906	31.7156	31.2727	31.4036	31.3073	31.4824	31.4937	+		+		44	29	32	29	37	30	35	36	34	33	49.2	49.2	139.32	0	1919900000	1785500000	1857300000	1.85423e+09	3526600000	2594300000	2840800000	2.98723e+09	2657300000	3000100000	3023700000	2893700000	0.620719	0.640783	1.03232	38	45	44	57	49	55
3701	Nuclear mitotic apparatus protein 1;SP-H antigen	32.0701	31.8456	31.7552	31.4889	31.5554	31.2949	31.1452	30.7796	30.4968	+		+		68	52	47	48	44	42	43	37	36	26	40.9	40.9	238.26	0	4508900000	3859000000	3624700000	3.99753e+09	3013700000	3155900000	2634500000	2934700000	2374800000	1843300000	1515100000	1.91107e+09	1.36216	2.09178	1.53563	76	70	66	62	59	56
5248	Optic atrophy 3 protein	17.4709	17.2312	17.0078	24.6309	24.8767	24.4618	16.7853	16.7983	17.5516	+	+		+	2	0	1	1	2	2	2	1	0	0	13.4	13.4	19.996	0.00016569	0	0	0	0	25980000	30806000	23107000	26631000	0	0	0	0	3.75502e-08	1	26631001	0	1	1	2	2	2
3500	Amino-terminal enhancer of split;Amino-terminal enhancer of split, isoform CRA_g;cDNA FLJ37272 fis, clone BRAMY2012091, highly similar to Homo sapiens amino-terminal enhancer of split (AES), transcript variant 1, mRNA;Gp130-associated protein GAM;Protein ESP1;Protein GRG	16.5799	16.1895	15.5753	27.0862	26.7038	25.9808	17.4289	17.1953	15.5473	+	+		+	3	1	0	1	3	2	2	1	0	1	20.5	20.5	29.091	2.4906e-17	0	0	0	0	142480000	109310000	66221000	1.06004e+08	0	0	0	0	9.43364e-09	1	1.06004e+08	2	0	2	4	2	2
5757	Deubiquitinating enzyme 24;Ubiquitin carboxyl-terminal hydrolase 24;Ubiquitin thioesterase 24;Ubiquitin-specific-processing protease 24;Ubiquitin carboxyl-terminal hydrolase	26.264	25.7275	25.5049	17.1212	16.9297	17.0246	26.4078	25.8119	25.9997	+	+		+	5	4	3	2	1	1	1	4	4	2	3.2	3.2	294.36	9.6131e-36	80586000	55557000	47613000	61252000	0	0	0	0	89032000	58904000	67097000	7.16777e+07	61252001	0.854548	1.39513e-08	4	3	2	1	0	1
3063	DNA polymerase delta subunit 2;DNA polymerase delta subunit p50;Putative uncharacterized protein POLD2	25.508	25.8517	24.1016	17.8825	16.5702	17.4001	24.9334	25.098	24.3287	+	+		+	6	5	4	2	1	0	0	2	3	2	19.6	19.6	51.289	2.4062e-55	47717000	60554000	18002000	42091000	0	0	0	0	32041000	35913000	21070000	2.96747e+07	42091001	1.41842	3.36988e-08	5	4	2	1	0	0
3734	Hemidesmosomal protein 1;Plectin-1	30.9538	30.846	31.1156	31.5813	31.5964	31.5803	30.4364	30.6434	30.6679	+	+		+	90	48	49	53	55	52	59	36	46	30	24.2	24.2	531.78	0	2079800000	1930100000	2326700000	2112200000	3213000000	3246900000	3210900000	3223600000	1453000000	1677200000	1705900000	1.61203e+09	0.65523	1.31027	1.99971	58	60	66	63	65	72
5432	L1;Protein FAM49B;cDNA FLJ10364 fis, clone NT2RM2001319	28.9811	28.8086	28.8171	28.578	28.5488	28.6398	29.0414	29.1276	29.1198	+			+	10	9	8	9	9	5	9	9	8	9	43.8	43.8	36.748	3.9844e-184	529890000	470170000	472940000	491000000	400720000	392680000	418250000	4.03883e+08	552490000	586520000	583360000	5.74123e+08	1.2157	0.855217	0.703478	11	9	12	10	5	11
2699	NADPH--cytochrome P450 reductase	30.3371	30.2715	30.7383	30.6462	30.6156	30.6128	31.0732	31.0326	30.9676	+			+	25	17	18	18	19	18	16	16	18	21	49.3	49.3	76.689	0	1356400000	1296100000	1791200000	1.48123e+09	1680400000	1645200000	1642000000	1.65587e+09	2259200000	2196500000	2099800000	2.18517e+09	0.894537	0.677858	0.757776	35	30	37	36	31	30
5041	Ribonuclease P protein subunit p25	26.0766	25.9951	25.3997	15.4942	16.857	17.8784	18.6497	25.1843	25.8673	+	+			2	2	2	2	1	1	1	1	2	2	13.6	13.6	20.632	5.3909e-76	70766000	66881000	44265000	6.06373e+07	0	0	0	0	0	38128000	61211000	33113000	6.06373e+07	1.83122	3.01996e-08	2	4	4	1	2	1
504	cDNA FLJ56180, highly similar to Negative elongation factor E;Negative elongation factor E;RNA-binding protein RD;cDNA FLJ52247, highly similar to Negative elongation factor E;RD RNA binding protein	26.5519	26.2163	26.1992	25.5826	25.6056	25.591	25.8385	25.7448	25.4844	+	+			5	5	4	4	3	3	2	2	3	3	21.7	21.7	43.924	2.8604e-275	98379000	77963000	77045000	8.44623e+07	50249000	51055000	50543000	5.06157e+07	60003000	56227000	46943000	54391000	1.6687	1.55287	0.930589	5	4	5	3	3	2
908	60S ribosomal protein L24;60S ribosomal protein L30;Putative uncharacterized protein RPL24;Ribosomal protein L24, isoform CRA_e	29.1898	28.7312	28.9239	29.7296	30.0276	29.8045	29.6809	29.3836	29.3158	+	+			5	4	4	4	5	4	4	4	4	4	30.6	30.6	17.779	1.0844e-84	612350000	445600000	509270000	5.22407e+08	890240000	1094500000	937690000	9.74143e+08	860660000	700380000	668220000	7.43087e+08	0.536273	0.703023	1.31094	9	7	9	12	12	10
2302	Core histone macro-H2A.1;Histone H2A.y;Medulloblastoma antigen MU-MB-50.205;Histone H2A	27.8148	28.8189	26.6966	17.4302	15.9681	15.997	16.4826	25.1807	17.9515	+	+			5	5	3	3	0	1	0	1	2	1	23.9	23.9	39.617	8.5285e-29	236090000	473530000	108760000	2.72793e+08	0	0	0	0	0	38032000	0	1.26773e+07	2.72793e+08	21.5182	7.88809e-08	5	4	3	0	1	0
5490	5-oxoprolyl-peptidase;Pyroglutamyl aminopeptidase I;Pyroglutamyl-peptidase 1;Pyroglutamyl-peptidase I;Pyrrolidone-carboxylate peptidase	25.1626	25.2131	24.8816	26.068	26.0849	26.206	25.714	26.6568	26.3373	+	+			5	3	3	2	4	2	3	4	2	2	45.5	45.5	23.138	9.4781e-61	37557000	38896000	30910000	3.57877e+07	70346000	71175000	77409000	7.29767e+07	55041000	105800000	84784000	81875000	0.490399	0.437101	0.891318	3	3	2	4	2	3
1399	Lysosomal acid phosphatase;cDNA FLJ51131, highly similar to Lysosomal acid phosphatase (EC 3.1.3.2);cDNA FLJ51107, highly similar to Lysosomal acid phosphatase (EC 3.1.3.2)	26.9472	26.9632	26.9424	27.2699	27.328	27.3166	27.1703	27.0888	26.9598	+	+			6	5	3	4	6	5	4	4	3	4	16.3	16.3	48.344	4.4729e-35	129390000	130840000	128960000	129730000	161830000	168480000	167160000	1.65823e+08	151030000	142740000	130530000	1.41433e+08	0.782339	0.917252	1.17245	5	4	4	6	5	5
2498	CPI-B;Cystatin-B;Liver thiol proteinase inhibitor;Stefin-B	32.1519	32.4355	32.7259	33.316	33.4012	33.2625	33.7226	33.2017	33.8328	+	+			6	5	5	5	5	5	5	5	5	6	79.6	79.6	11.139	4.6825e-163	4771900000	5808400000	7103500000	5894600000	10693000000	11344000000	10304000000	1.07803e+10	14175000000	9879100000	15300000000	1.3118e+10	0.546792	0.449351	0.821795	23	18	19	25	18	26
4477	Nucleoporin Nup43;Nup107-160 subcomplex subunit Nup43;p42;cDNA FLJ53749, moderately similar to Nucleoporin Nup43	27.4914	27.7698	27.4921	26.6277	26.7665	26.7028	27.228	26.9757	27.0422	+	+			6	5	3	4	4	4	3	3	3	4	25.3	25.3	42.15	7.1901e-69	188680000	228840000	188780000	202100000	103690000	114160000	109230000	1.09027e+08	157200000	131980000	138200000	142460000	1.85367	1.41864	0.765314	6	4	5	4	4	3
4699	39S ribosomal protein L24, mitochondrial	29.4658	29.2367	29.2354	28.5945	28.6888	28.4421	28.7208	28.2897	27.9432	+	+			6	2	5	5	3	4	4	3	4	3	31.5	31.5	24.915	4.5801e-27	741450000	632600000	632010000	6.68687e+08	405320000	432690000	364680000	4.00897e+08	442420000	328130000	258070000	3.42873e+08	1.66798	1.95024	1.16923	2	7	7	3	4	4
5075	Adenosine diphosphoribose pyrophosphatase;ADP-ribose diphosphatase;ADP-ribose phosphohydrolase;ADP-ribose pyrophosphatase, mitochondrial;Nucleoside diphosphate-linked moiety X motif 9	28.3312	28.4983	28.4486	28.6879	28.7654	28.7237	29.2289	28.7845	29.2066	+	+			6	3	6	3	4	5	5	5	5	6	23.4	23.4	39.125	7.8426e-67	337710000	379180000	366340000	3.61077e+08	432430000	456300000	443290000	4.44007e+08	629160000	462380000	619540000	570360000	0.813224	0.633068	0.778467	3	6	3	5	5	6
4928	Protein S100-A13;S100 calcium-binding protein A13	32.2705	32.214	31.9443	33.7742	33.4141	33.2146	33.8582	33.5823	32.8856	+	+			7	3	5	5	5	5	4	6	6	4	60.2	60.2	11.471	7.4803e-112	5180600000	4981600000	4132200000	4764800000	14691000000	11446000000	9967400000	12034800000	15572000000	12861000000	7934900000	1.21226e+10	0.395919	0.39305	0.992755	11	11	14	19	16	13
5357	Probable fructose-2,6-bisphosphatase TIGAR;TP53-induced glycolysis and apoptosis regulator	26.6951	26.6667	26.8277	27.7611	27.9099	27.5408	26.9967	26.812	27.4658	+	+			7	5	4	6	5	5	6	5	6	5	34.1	34.1	30.062	7.4389e-113	108650000	106530000	119110000	111430000	227470000	252190000	195260000	2.24973e+08	133910000	117820000	185370000	145700000	0.495303	0.764791	1.54409	5	4	6	5	5	6
2297	Apoptosis-linked gene 2 protein;Probable calcium-binding protein ALG-2;Programmed cell death protein 6;HCG1985580, isoform CRA_f;Programmed cell death 6	28.9896	29.06	29.4231	28.3411	28.3198	28.2319	28.5673	28.6474	28.2949	+	+			8	5	8	6	5	4	6	5	5	5	50.8	50.8	21.868	7.9119e-75	533000000	559670000	719820000	6.04163e+08	340040000	335050000	315250000	3.30113e+08	397760000	420460000	329320000	3.82513e+08	1.83017	1.57946	0.863011	8	10	10	6	6	7
2948	Glutathione peroxidase 4;Phospholipid hydroperoxide glutathione peroxidase, mitochondrial	27.5156	27.3861	27.7509	28.7123	28.5162	28.4531	28.3019	28.0013	28.2891	+	+			8	3	4	3	6	6	5	4	7	5	36.5	36.5	22.192	2.0514e-28	191870000	175400000	225870000	1.97713e+08	439810000	383920000	367480000	397070000	330910000	268680000	328000000	3.09197e+08	0.497931	0.639442	1.2842	4	5	4	7	7	8
5276	PH and FYVE domain-containing protein 2;Phafin-2;Pleckstrin homology domain-containing family F member 2;Zinc finger FYVE domain-containing protein 18	27.0827	27.7819	27.9006	29.6005	29.4506	28.9499	29.0674	28.6193	28.508	+	+			8	4	5	5	7	7	6	6	7	5	43	43	27.797	1.7426e-196	142140000	230770000	250560000	2.07823e+08	814010000	733720000	518550000	688760000	562550000	412350000	381740000	4.52213e+08	0.301735	0.459569	1.52309	4	6	5	11	10	8
277	GRIP1-associated protein 1;GRIP1 associated protein 1	25.2384	25.2059	25.5851	26.0837	26.3527	26.1162	26.3832	26.2538	25.7396	+	+			9	4	3	3	4	4	6	4	4	3	14.3	14.3	95.988	1.1171e-141	39583000	38701000	50336000	4.28733e+07	71120000	85694000	72735000	7.65163e+07	87525000	80014000	56027000	74522000	0.560316	0.575311	1.02676	4	3	3	4	4	6
3032	40S ribosomal protein S9;Putative uncharacterized protein RPS9;Ribosomal protein S9, isoform CRA_e;Ribosomal protein S9, isoform CRA_c	30.2652	30.2685	30.6455	31.0802	31.1786	31.3699	30.853	30.6564	30.8429	+	+			9	5	7	7	6	9	8	9	8	8	33	33	22.591	8.6347e-27	1290400000	1293400000	1679600000	1.42113e+09	2270200000	2430400000	2775200000	2.49193e+09	1939500000	1692400000	1925900000	1852600000	0.570293	0.767102	1.3451	11	10	13	11	15	19
4226	Carbonyl reductase II;Dicarbonyl/L-xylulose reductase;Kidney dicarbonyl reductase;L-xylulose reductase;Sperm surface protein P34H	31.7861	32.3207	32.2593	33.1887	33.1015	33.1737	32.954	32.66	32.9357	+	+			9	7	6	6	7	5	6	7	7	7	53.7	53.7	25.913	8.8681e-163	3703100000	5364100000	5140700000	4.73597e+09	9790500000	9215900000	9688700000	9.56503e+09	8320400000	6786500000	8215200000	7.77403e+09	0.495133	0.609203	1.23038	15	16	17	20	18	21
2467	Hypoxanthine-guanine phosphoribosyltransferase	31.5479	31.61	31.6125	31.968	31.8646	31.9747	32.224	31.9607	32.4375	+	+			10	8	9	7	10	10	10	10	10	9	50.5	50.5	24.579	1.4849e-204	3139600000	3277700000	3283300000	3.23353e+09	4200800000	3910200000	4220200000	4110400000	5016300000	4179500000	5816600000	5.00413e+09	0.786671	0.646172	0.821401	13	15	15	17	14	20
3531	Transducin beta-like protein 3;WD repeat-containing protein SAZD	28.4086	28.2542	28.0665	16.7089	17.259	16.5637	17.214	26.0122	17.3014	+	+			10	3	8	8	1	0	1	1	2	1	18.8	18.8	89.034	9.1376e-51	356310000	320150000	281100000	3.19187e+08	0	0	0	0	0	67678000	0	2.25593e+07	3.19187e+08	14.1488	4.43275e-08	4	7	8	1	0	1
3582	Dehydrogenase/reductase SDR family member 2;Dicarbonyl reductase HEP27;Protein D	30.3272	29.5122	31.2762	26.6006	27.0971	27.2222	27.6883	27.4492	28.5285	+	+			10	4	9	7	3	3	3	3	4	4	47.7	47.7	27.438	4.1253e-104	1347100000	765680000	2600600000	1.57113e+09	101760000	143560000	156570000	1.33963e+08	216270000	183250000	387190000	2.62237e+08	11.728	5.99125	0.510849	7	13	15	3	4	4
1280	Epithelial splicing regulatory protein 1;RNA-binding motif protein 35A;RNA-binding protein 35A	27.2603	27.1019	27.413	26.2816	26.4602	26.5622	26.4852	26.8311	26.8889	+	+			11	7	6	8	2	7	5	5	4	5	24.2	24.2	75.585	1.1496e-163	160760000	144040000	178700000	1.61167e+08	81572000	92327000	99085000	9.09947e+07	93939000	119390000	124270000	112533000	1.77117	1.43217	0.808604	8	6	8	2	8	5
2319	Complex I-30kD;NADH dehydrogenase [ubiquinone] iron-sulfur protein 3, mitochondrial;NADH-ubiquinone oxidoreductase 30 kDa subunit	29.4533	29.6172	29.3409	28.6726	28.8966	28.6923	28.7408	29.0931	29.0267	+	+			11	9	10	9	6	8	6	8	9	7	48.1	48.1	30.241	1.3217e-242	735060000	823490000	679970000	7.46173e+08	427860000	499730000	433750000	453780000	448600000	572650000	546910000	522720000	1.64435	1.42748	0.868113	10	12	13	8	11	7
5697	Protein CDV3 homolog	30.3599	30.4792	30.9828	29.1797	29.1908	29.2484	29.2418	29.6617	29.7433	+	+			11	7	11	9	6	8	4	6	7	7	72.1	72.1	27.335	0	1378000000	1496800000	2122000000	1665600000	608100000	612780000	637760000	6.19547e+08	634840000	849320000	898750000	7.94303e+08	2.68842	2.09693	0.779987	15	19	20	10	13	8
5942	Adaptor protein complex AP-1 mu-2 subunit;Adaptor-related protein complex 1 mu-2 subunit;AP-1 complex subunit mu-2;AP-mu chain family member mu1B;Clathrin assembly protein complex 1 medium chain 2;Golgi adaptor HA1/AP1 adaptin mu-2 subunit;Mu1B-adaptin;Mu-adaptin 2	27.4692	27.5069	27.5029	27.8798	27.992	28.115	27.9727	27.7441	27.6438	+	+			11	8	3	7	7	7	8	6	6	8	31.7	31.7	48.108	3.7531e-127	185800000	190720000	190190000	1.88903e+08	246970000	266960000	290700000	268210000	263410000	224810000	209700000	232640000	0.704311	0.811999	1.1529	10	6	6	10	10	11
489	54 kDa nucleoporin;Nucleoporin p54;cDNA FLJ52746, highly similar to Nucleoporin p54	29.108	29.2161	29.098	28.3714	28.6144	28.5742	28.5853	28.462	28.8406	+	+			12	9	8	8	6	7	8	7	8	8	28.2	28.2	55.435	0	578610000	623620000	574590000	5.92273e+08	347250000	410950000	399650000	385950000	402740000	369760000	480700000	4.17733e+08	1.53459	1.41783	0.923915	10	10	10	7	9	9
2293	Complex I-49kD;NADH dehydrogenase [ubiquinone] iron-sulfur protein 2, mitochondrial;NADH-ubiquinone oxidoreductase 49 kDa subunit	30.0517	29.9237	29.9222	29.265	29.4069	29.508	29.6061	29.3445	29.6806	+	+			12	8	9	8	6	7	6	4	8	3	38.2	38.2	52.545	2.1263e-89	1112900000	1018400000	1017400000	1.04957e+09	645120000	711810000	763460000	7.06797e+08	817170000	681660000	860500000	7.86443e+08	1.48496	1.33457	0.898725	9	12	10	6	9	7
2614	cAMP-dependent protein kinase type I-alpha regulatory subunit;Tissue-specific extinguisher 1	28.1099	27.6755	27.2822	29.6269	29.3443	29.6466	29.6386	28.4589	29.3054	+	+			12	5	5	3	8	8	6	7	8	5	36.5	36.5	42.981	1.2846e-36	289690000	214370000	163220000	2.22427e+08	829080000	681580000	840480000	7.83713e+08	835790000	368970000	663440000	6.22733e+08	0.283811	0.357178	1.25851	7	5	3	12	9	8
5098	Cat eye syndrome critical region protein 5	29.629	29.9676	29.922	29.1907	29.2485	29.1805	29.0277	29.22	29.4586	+	+			12	11	11	9	10	7	7	8	9	9	45.2	45.2	46.321	5.4585e-255	830260000	1049900000	1017200000	9.65787e+08	612720000	637780000	608420000	619640000	547280000	625320000	737790000	6.36797e+08	1.55863	1.51663	0.973058	14	14	11	14	7	10
2459	53 kDa BRG1-associated factor A;Actin-like protein 6A;Actin-related protein Baf53a;ArpNbeta;BRG1-associated factor 53A;INO80 complex subunit K	30.0274	30.0785	29.7805	29.4235	29.4157	29.3453	29.6211	29.6898	29.5453	+	+			13	12	12	12	10	9	12	8	9	11	44.5	44.5	47.46	8.7234e-211	1094300000	1133800000	922180000	1.05009e+09	720020000	716160000	682050000	7.06077e+08	825720000	866000000	783480000	8.25067e+08	1.48722	1.27274	0.855781	15	16	15	11	12	13
5642	Humb5R2;NAD(P)H:quinone oxidoreductase type 3 polypeptide A2;NADH-cytochrome b5 reductase 1	28.6129	28.8407	28.6186	29.8113	29.6229	29.3942	29.7487	29.1959	29.2456	+	+			13	6	9	7	9	8	8	9	9	11	49.5	49.5	34.094	1.2497e-149	410530000	480730000	412160000	4.34473e+08	942110000	826750000	705570000	824810000	902120000	614940000	636490000	717850000	0.526756	0.605243	1.149	9	12	10	16	14	11
2363	ATP-dependent Clp protease ATP-binding subunit clpX-like, mitochondrial;Putative uncharacterized protein DKFZp586J151	28.3603	28.4839	28.4162	27.6997	27.7105	27.4224	27.4844	27.6144	26.7776	+	+			14	9	7	8	3	6	6	6	8	2	30	30	69.223	4.2728e-99	344580000	375420000	358200000	359400000	217990000	219630000	179870000	205830000	187770000	205480000	115040000	169430000	1.7461	2.12123	1.21484	11	9	11	4	7	6
1	Monocyte protein 4;Ubiquitin-activating enzyme E1-like protein 2;Ubiquitin-like modifier-activating enzyme 6	27.8412	27.7499	27.9076	28.8463	28.623	28.5396	28.5116	27.947	28.477	+	+			16	6	7	8	9	6	11	9	8	9	23.2	23.2	117.97	2.3534e-83	240460000	225710000	251780000	2.39317e+08	482620000	413420000	390180000	428740000	382680000	258750000	373620000	338350000	0.558186	0.707305	1.26715	8	7	12	11	8	14
5729	Nuclear matrix protein 200;Pre-mRNA-processing factor 19;PRP19/PSO4 homolog;Senescence evasion factor	30.9974	30.9228	30.9678	30.098	29.8635	30.1322	30.0508	30.7804	30.3327	+	+			16	12	14	11	10	8	11	8	8	10	58.9	58.9	55.18	5.5209e-221	2143600000	2035600000	2100100000	2093100000	1149200000	976830000	1176800000	1.10094e+09	1112200000	1844300000	1352200000	1.43623e+09	1.90119	1.45735	0.766549	17	22	19	12	10	14
5197	EH domain-containing protein 4;Hepatocellular carcinoma-associated protein 10/11;PAST homolog 4	28.0179	27.9983	28.1048	28.6156	28.8053	28.7782	28.5889	28.5867	29.116	+	+			17	7	6	5	11	9	14	13	12	11	40.3	40.3	61.174	6.5466e-265	271790000	268120000	288670000	2.76193e+08	411290000	469080000	460370000	4.46913e+08	403760000	403150000	581800000	4.62903e+08	0.618002	0.596654	0.965457	7	6	6	13	13	19
5599	Anthracycline-associated resistance ARX;SUMO-activating enzyme subunit 2;Ubiquitin-like 1-activating enzyme E1B;cDNA FLJ42740 fis, clone BRAWH2016655, highly similar to Ubiquitin-like 1-activating enzyme E1B	29.9424	30.0624	29.9392	29.5086	29.6939	29.6501	29.6145	29.4352	29.7005	+	+			18	10	13	12	10	11	10	9	11	10	45.6	45.6	71.223	0	1031700000	1121200000	1029400000	1.06077e+09	763770000	868470000	842490000	824910000	821960000	725890000	872460000	806770000	1.28592	1.31483	1.02248	12	16	16	12	15	14
2545	Cathepsin D;Cathepsin D heavy chain;Cathepsin D light chain;Putative uncharacterized protein CTSD	34.9752	35.1196	35.3739	33.768	34.1816	33.9347	34.2321	34.3201	34.8177	+	+			19	17	18	17	12	15	15	15	15	16	49	49	44.552	0	33774000000	37329000000	44524000000	3.85423e+10	14628000000	19485000000	16420000000	1.68443e+10	20178000000	21447000000	30282000000	23969000000	2.28815	1.60801	0.702755	114	88	123	50	57	53
2806	DNA-directed RNA polymerase II subunit A;DNA-directed RNA polymerase II subunit RPB1;DNA-directed RNA polymerase III largest subunit;RNA-directed RNA polymerase II subunit RPB1	27.6202	27.5983	27.6488	26.8573	26.8457	27.2162	27.191	26.7199	26.5805	+	+			22	13	13	8	9	4	7	8	8	5	19.8	19.8	217.17	7.0777e-204	206310000	203200000	210430000	2.06647e+08	121580000	120600000	155920000	132700000	153220000	110530000	100350000	1.21367e+08	1.55725	1.70266	1.09338	14	16	10	10	4	7
4165	Protein FAM83H	28.3896	28.0944	28.5169	29.4438	29.6363	29.1522	28.8831	29.1943	28.7578	+	+			23	7	9	10	16	11	12	8	11	9	30.2	30.2	127.12	1.2032e-296	351660000	286590000	384110000	3.40787e+08	730240000	834450000	596600000	720430000	495080000	614250000	453900000	5.21077e+08	0.473032	0.654005	1.38258	8	10	12	19	12	12
327	Lon protease homolog, mitochondrial;Lon protease-like protein;LONHs;Mitochondrial ATP-dependent protease Lon;Serine protease 15;Lon protease homolog	29.5721	29.6137	29.579	29.2736	28.9893	29.0133	29.0373	28.9434	29.3182	+	+			24	15	18	17	15	12	12	14	16	13	35.8	35.8	106.49	2.5866e-295	798170000	821530000	801970000	8.07223e+08	648980000	532900000	541860000	574580000	550920000	516220000	669370000	5.78837e+08	1.40489	1.39456	0.992646	21	24	23	20	13	14
1144	136 kDa double-stranded RNA-binding protein;Double-stranded RNA-specific adenosine deaminase;Interferon-inducible protein 4;K88DSRBP	31.1551	30.8899	30.8425	30.4491	30.3344	30.3807	30.2157	30.4668	30.4848	+	+			25	19	18	23	17	15	17	14	14	12	31.8	31.8	140.83	0	2391200000	1989700000	1925400000	2102100000	1465900000	1353800000	1398000000	1405900000	1246900000	1484000000	1502600000	1.41117e+09	1.4952	1.48962	0.996268	32	26	33	25	19	26
2252	UDP-glucose 6-dehydrogenase;cDNA FLJ60093, highly similar to UDP-glucose 6-dehydrogenase (EC 1.1.1.22)	32.7776	32.7243	33.2552	30.7169	31.2737	31.4951	31.7031	31.653	32.2576	+	+			28	23	22	26	17	19	22	19	21	22	57.3	57.3	55.023	0	7362600000	7095800000	10252000000	8236800000	1764900000	2596100000	3026700000	2.46257e+09	3496000000	3376800000	5134500000	4.00243e+09	3.3448	2.05795	0.615267	51	45	58	21	34	37
2207	Alpha-actinin-4;F-actin cross-linking protein;Non-muscle alpha-actinin 4	32.5893	32.5511	32.1623	31.4682	31.645	31.6255	32.0611	31.7781	31.5967	+	+			49	38	40	31	34	32	30	37	36	30	70.1	70.1	104.85	0	6461900000	6293200000	4806200000	5.85377e+09	2970700000	3358200000	3313000000	3.21397e+09	4480900000	3682700000	3247600000	3.80373e+09	1.82135	1.53895	0.844951	58	69	52	45	40	39
2758	Actin-binding protein 280;Alpha-filamin;Endothelial actin-binding protein;Filamin-1;Filamin-A;Non-muscle filamin;Filamin A, alpha (Actin binding protein 280)	35.185	34.9981	35.0537	35.5495	35.4248	35.4519	35.7795	35.5875	35.4279	+	+			106	85	94	87	91	89	91	92	94	86	54.5	54.5	280.74	0	39060000000	34314000000	35662000000	3.63453e+10	50287000000	46125000000	46998000000	4.78033e+10	58980000000	51630000000	46224000000	52278000000	0.76031	0.695232	0.914406	206	194	205	218	200	212
2540	Histone H2B type 1-J;Histone H2B.1;Histone H2B.r;Histone H2B type 1-O;Histone H2B.2;Histone H2B.n;Histone H2B type 1-B;Histone H2B.f;Histone H2B type 2-E;Histone H2B.q;Histone H2B-GL105;H2B type 12;Histone H2B type 3-B	28.9301	28.8268	29.3951	25.3859	26.3454	27.3872	28.0643	28.5286	28.6338	+				2	2	2	2	2	2	2	2	2	2	46.8	7.9	13.904	7.1612e-221	511460000	476140000	705980000	5.64527e+08	43846000	85264000	175540000	101550000	280670000	387230000	416510000	361470000	5.5591	1.56175	0.280936	6	7	8	3	3	5
3411	Histone H3.3	29.163	29.7311	28.3413	27.0871	26.6893	27.1289	28.0385	27.6289	27.1205	+				2	2	2	2	2	2	2	2	2	2	28.7	28.7	15.328	1.7388e-81	601100000	891140000	340090000	6.10777e+08	142570000	108210000	146760000	1.32513e+08	275690000	207550000	145910000	2.09717e+08	4.60917	2.91239	0.631868	7	7	3	3	3	3
1533	Succinate dehydrogenase assembly factor 2, mitochondrial;Succinate dehydrogenase subunit 5, mitochondrial	26.8427	27.748	26.4044	28.1298	28.2889	28.3517	28.4804	28.5198	28.38	+				4	3	2	2	4	2	2	3	2	2	25.9	25.9	19.599	6.909e-30	120350000	225410000	88819000	1.4486e+08	293710000	327940000	342540000	3.21397e+08	374510000	384860000	349320000	3.69563e+08	0.450719	0.391975	0.869666	3	3	2	4	3	3
267	Guanylate kinase 1;GMP kinase;Guanylate kinase	29.0448	28.7703	29.2696	29.7605	29.4878	29.6479	29.5837	29.7636	30.0105	+				5	3	4	2	4	3	3	3	4	4	27.3	27.3	27.578	4.0808e-102	553800000	457850000	647200000	552950000	909530000	752840000	841240000	8.34537e+08	804600000	911470000	1081600000	9.32557e+08	0.662583	0.59294	0.894891	5	5	4	6	6	5
1352	Antigen MLAA-34;Calcium-binding protein 39-like;Mo25-like protein;Calcium binding protein 39-like	17.1175	23.4497	17.0378	27.2867	26.3484	26.0081	26.396	26.1658	26.1086	+				5	0	2	0	4	4	4	3	4	3	20.8	18.1	39.087	1.6059e-39	0	11457000	0	3819000	163720000	85441000	67485000	1.05549e+08	88308000	75284000	72355000	78649000	0.0361824	0.0485575	1.34202	0	2	0	6	5	4
2096	AU-rich element RNA-binding factor;Heterogeneous nuclear ribonucleoprotein D-like;JKT41-binding protein;Protein laAUF1	29.892	29.7722	29.0492	28.8817	28.9908	28.5048	28.399	28.2046	27.5138	+				5	3	4	3	3	2	3	3	2	3	15	10.7	46.437	1.4566e-69	996310000	916940000	555490000	8.22913e+08	494590000	533470000	380900000	4.69653e+08	353950000	309330000	191630000	284970000	1.75217	2.88772	1.64808	5	6	4	5	3	4
3231	Complex I-B14;LYR motif-containing protein 6;NADH dehydrogenase [ubiquinone] 1 alpha subcomplex subunit 6;NADH-ubiquinone oxidoreductase B14 subunit	28.4187	28.5485	28.2745	28.5624	28.4116	28.3561	28.7899	28.717	28.7993	+				5	3	3	4	5	2	4	4	5	4	33.8	33.8	17.871	2.6201e-66	358820000	392610000	324690000	3.58707e+08	396420000	357060000	343580000	3.65687e+08	464120000	441250000	467130000	457500000	0.980913	0.784058	0.799315	4	6	6	7	2	5
3570	FAS-associated death domain protein;FAS-associating death domain-containing protein;Growth-inhibiting gene 3 protein;Mediator of receptor induced toxicity;Protein FADD	26.2162	26.6837	27.3505	27.9845	28.2745	27.8827	28.2746	28.4883	28.0184	+				5	3	4	4	5	4	5	4	5	4	40.9	40.9	23.279	1.6494e-77	77961000	107790000	171130000	1.1896e+08	265560000	324700000	247470000	2.79243e+08	324710000	376550000	271880000	324380000	0.42601	0.366731	0.860852	3	4	5	7	6	6
4723	Hcp beta-lactamase-like protein C1orf163	27.7188	28.074	27.4469	27.0113	27.0735	26.7938	27.1043	26.8508	26.936	+				5	4	4	3	3	2	4	4	4	3	30.7	30.7	25.709	2.1233e-56	220890000	282560000	182950000	228800000	135270000	141230000	116340000	1.30947e+08	144280000	121030000	128390000	1.31233e+08	1.74728	1.74346	0.997816	5	5	4	3	2	4
5295	H-Lse;Sialate O-acetylesterase;Sialic acid-specific 9-O-acetylesterase	26.1985	25.31	25.6822	26.6476	26.4802	26.2368	26.792	26.8153	27.0553	+				5	2	2	3	3	4	5	4	4	4	18	18	58.314	2.1298e-159	77006000	41597000	53843000	57482000	105130000	93615000	79080000	9.26083e+07	116200000	118090000	139460000	1.24583e+08	0.6207	0.461394	0.743344	4	3	5	4	6	9
5383	Arsenic-transactivated protein;Chromatin accessibility complex 17 kDa protein;DNA polymerase epsilon subunit 3;DNA polymerase epsilon subunit p17;DNA polymerase II subunit 3	27.4597	27.4647	27.2881	27.7497	27.5648	27.674	27.8377	27.9637	28.3311	+				5	2	4	3	3	3	3	3	2	4	44.2	44.2	16.859	2.3087e-109	184580000	185230000	163880000	1.77897e+08	225680000	198530000	214140000	2.12783e+08	239870000	261760000	337690000	2.79773e+08	0.836046	0.63586	0.760556	3	6	4	5	4	4
2697	Histone H1.5;Histone H1a	32.2611	31.8551	31.6494	30.3805	31.0033	30.4765	31.6468	31.2197	31.1194	+				6	6	6	6	5	6	6	6	6	6	22.1	22.1	22.58	3.2815e-125	5147100000	3884500000	3368400000	4.13333e+09	1397800000	2152400000	1494000000	1681400000	3362300000	2500700000	2332800000	2.73193e+09	2.45827	1.51297	0.615462	30	23	28	14	18	21
3566	TAR DNA-binding protein 43;TAR DNA binding protein;cDNA FLJ58188, highly similar to TAR DNA-binding protein 43	30.1665	29.8634	30.0842	29.2425	29.1772	29.5679	29.3855	29.3203	29.7148	+				6	6	6	6	6	6	6	5	6	5	22.6	22.6	44.991	0	1205100000	976720000	1138300000	1.10671e+09	635140000	607050000	795840000	6.79343e+08	701300000	670340000	881130000	7.50923e+08	1.62908	1.47379	0.904677	14	14	15	11	12	15
3887	2,4-dienoyl-CoA reductase 2;Peroxisomal 2,4-dienoyl-CoA reductase;2,4-dienoyl CoA reductase 2, peroxisomal	27.7195	28.1433	27.7334	27.1885	27.418	27.1713	27.1501	26.9787	27.3543	+				6	5	5	3	4	5	3	4	5	2	25	25	30.777	3.3081e-48	221000000	296460000	223140000	2.46867e+08	152950000	179330000	151140000	161140000	148930000	132250000	171580000	150920000	1.532	1.63575	1.06772	6	6	4	5	5	4
4780	LAG1 longevity assurance homolog 2;SP260;Tumor metastasis-suppressor gene 1 protein;LAG1 homolog, ceramide synthase 2	31.9552	31.5951	31.8817	32.3104	32.3114	32.3224	32.285	32.4815	32.3474	+				6	5	6	4	3	6	4	4	5	4	16.8	16.8	44.876	1.5355e-157	4163800000	3244000000	3956700000	3.78817e+09	5326100000	5329800000	5370300000	5.34207e+09	5232900000	5996700000	5464400000	5.56467e+09	0.70912	0.680754	0.959998	7	7	7	6	9	7
5806	Calcium-regulated heat stable protein 1;Calcium-regulated heat-stable protein of 24 kDa	29.976	30.9954	31.1311	32.2125	31.6659	31.8668	32.0892	32.2232	32.3396	+				6	4	4	4	4	4	4	4	5	3	66	66	15.892	1.846e-94	1056000000	2140600000	2351700000	1.84943e+09	4976500000	3407000000	3916200000	4099900000	4568800000	5013500000	5435000000	5.00577e+09	0.451092	0.369461	0.819035	6	7	7	14	7	9
544	Chronic renal failure gene protein;GTP-binding protein NGB;Nucleolar GTP-binding protein 1;cDNA FLJ55652, highly similar to Nucleolar GTP-binding protein 1;cDNA FLJ56266, highly similar to Nucleolar GTP-binding protein 1	27.2699	27.0396	27.0884	26.562	26.2757	26.6702	26.419	25.8712	26.4652	+				7	3	5	4	3	4	3	2	3	2	15.5	15.5	73.964	4.9026e-85	161830000	137950000	142700000	1.47493e+08	99075000	81240000	106790000	9.57017e+07	89722000	61379000	92647000	8.12493e+07	1.54118	1.81532	1.17788	3	5	4	3	4	3
720	Calcium-activated neutral proteinase 2;Calpain large polypeptide L2;Calpain M-type;Calpain-2 catalytic subunit;Calpain-2 large subunit;Millimolar-calpain;cDNA, FLJ79110, highly similar to Calpain-2 catalytic subunit (EC 3.4.22.53)	25.6877	26.454	26.1199	25.175	25.5748	25.6833	26.8457	27.0933	27.4166	+				7	2	3	4	3	3	4	4	4	4	14.7	14.7	79.994	2.0175e-82	54045000	91928000	72927000	7.29667e+07	37881000	49978000	53881000	4.72467e+07	120600000	143180000	179150000	1.47643e+08	1.54438	0.494209	0.320005	3	5	5	4	4	4
1267	CHL12;Chromosome transmission fidelity protein 18 homolog	26.5458	26.5172	26.4717	25.8567	25.8698	26.1797	26.455	26.184	26.179	+				7	5	5	3	3	5	4	3	2	2	8.8	8.8	129.4	0	97969000	96041000	93060000	95690000	60762000	61318000	76013000	66031000	91989000	76238000	75973000	81400000	1.44917	1.17555	0.811192	7	7	4	3	5	4
1305	Eukaryotic translation initiation factor 2-alpha kinase 2;Interferon-induced, double-stranded RNA-activated protein kinase;Interferon-inducible RNA-dependent protein kinase;P1/eIF-2A protein kinase;p68 kinase;Protein kinase RNA-activated;EIF2AK2 protein	26.8729	26.2924	26.4157	27.9637	27.349	27.5236	27.1321	26.6976	26.9461	+				7	3	3	4	4	5	4	5	4	7	19.6	19.6	62.094	2.1334e-47	122900000	82187000	89518000	9.82017e+07	261760000	170950000	192950000	2.08553e+08	147090000	108840000	129300000	128410000	0.470871	0.764751	1.62412	3	3	4	5	5	5
2190	Peptidyl-prolyl cis-trans isomerase H;Rotamase H;Small nuclear ribonucleoprotein particle-specific cyclophilin H;U-snRNP-associated cyclophilin SnuCyp-20;Peptidyl-prolyl cis-trans isomerase	28.1886	28.4293	28.1011	27.8482	27.9637	27.6563	27.5382	27.0352	27.5446	+				7	5	6	5	4	4	3	3	4	2	59.3	52.5	19.208	6.0891e-89	305930000	361470000	287930000	3.18443e+08	241630000	261770000	211530000	238310000	194900000	137530000	195770000	1.76067e+08	1.33626	1.80865	1.35352	6	8	6	5	5	4
2375	Myosin-Id	27.9238	27.412	27.2595	26.7343	26.5059	26.8573	26.5851	26.3186	26.7256	+				7	5	5	4	4	3	3	3	3	3	10.1	10.1	116.2	8.5761e-103	254630000	178580000	160670000	197960000	111640000	95293000	121580000	1.09504e+08	100670000	83695000	110970000	98445000	1.80778	2.01087	1.11234	5	6	5	4	3	3
2478	GTPase NRas;Transforming protein N-Ras	29.3437	29.485	29.3617	28.6	28.9139	28.9879	29.2986	29.2477	29.1855	+				7	6	6	5	6	6	5	7	7	7	52.4	52.4	21.229	1.7565e-294	681290000	751400000	689850000	7.07513e+08	406860000	505750000	532380000	4.81663e+08	660330000	637420000	610530000	6.36093e+08	1.4689	1.11228	0.757221	6	6	8	7	6	5
3197	UV excision repair protein RAD23 homolog A	27.4758	26.7303	27.2014	28.3842	28.4603	28.1412	28.3581	28.7869	29.4455	+				7	4	2	3	4	3	3	3	6	3	49	42.7	39.609	6.0991e-164	186660000	111330000	154330000	1.50773e+08	350340000	369310000	296040000	3.38563e+08	344060000	463140000	731090000	5.12763e+08	0.445333	0.294041	0.660272	5	3	5	8	4	4
4758	Glucosamine 6-phosphate N-acetyltransferase;Phosphoglucosamine acetylase;Phosphoglucosamine transacetylase	28.8912	28.3385	28.5417	29.1341	29.153	29.0003	29.377	29.1984	29.2535	+				7	5	6	6	7	5	7	7	7	6	65.2	65.2	20.749	5.7004e-183	497860000	339430000	390750000	4.09347e+08	589170000	596950000	536990000	574370000	697200000	616010000	639980000	6.51063e+08	0.712688	0.628736	0.882203	7	8	7	9	7	9
5386	ATP-dependent chromatin-remodeling protein;ATP-utilizing chromatin assembly and remodeling factor 1;Bromodomain adjacent to zinc finger domain protein 1A;CHRAC subunit ACF1;hWALp1;Williams syndrome transcription factor-related chromatin-remodeling factor 180	26.4698	27.0892	26.2778	25.6249	25.8432	25.5936	25.3258	25.2809	25.6404	+				7	3	4	4	2	3	3	2	2	2	7.3	7.3	178.7	4.3916e-14	92941000	142780000	81359000	1.05693e+08	51745000	60196000	50633000	5.41913e+07	42056000	40768000	52302000	45042000	1.95037	2.34655	1.20313	4	4	4	2	3	3
5838	Methionine-R-sulfoxide reductase B2, mitochondrial	28.1814	28.7661	28.0051	27.1001	27.3004	26.9531	27.0321	27.4323	27.1678	+				7	6	6	6	5	6	6	3	3	2	71.4	71.4	19.536	1.4033e-83	304410000	456530000	269390000	3.43443e+08	143860000	165290000	129920000	1.46357e+08	137240000	181110000	150770000	1.56373e+08	2.34662	2.1963	0.935944	9	10	8	7	7	8
750	PTPRK protein;Protein tyrosine phosphatase, receptor type, K;Receptor-type tyrosine-protein phosphatase kappa	28.1632	28.7721	28.2375	27.7296	27.9114	27.5628	27.5397	27.4843	27.6013	+				8	4	6	4	4	4	5	4	4	4	7.3	7.3	166.03	3.2381e-31	300580000	458410000	316480000	358490000	222560000	252440000	198260000	224420000	195110000	187760000	203620000	1.95497e+08	1.59741	1.83374	1.14795	5	8	5	3	4	6
1532	Cadherin-1;CAM 120/80;E-Cad/CTF1;E-Cad/CTF2;E-Cad/CTF3;Epithelial cadherin;Uvomorulin;Cadherin 1, type 1, E-cadherin (Epithelial), isoform CRA_c;E-cadherin	29.5659	29.4695	29.0882	28.37	28.7543	28.6578	28.732	29.012	28.7538	+				8	5	4	7	4	5	6	5	6	4	15.9	15.9	99.577	2.634e-285	794720000	743370000	570710000	7.02933e+08	346920000	452810000	423520000	407750000	445860000	541370000	452660000	4.79963e+08	1.72393	1.46456	0.849544	6	7	7	4	7	6
1725	Phosphate carrier protein, mitochondrial;Phosphate transport protein;Solute carrier family 25 member 3	30.8355	30.1966	30.095	29.2046	29.3059	29.3009	29.563	29.7925	29.4855	+				8	6	5	8	6	6	7	6	8	6	28.3	28.3	39.958	2.2714e-175	1916100000	1230500000	1146800000	1.43113e+09	618660000	663680000	661390000	647910000	793160000	929890000	751630000	8.24893e+08	2.20885	1.73493	0.785447	13	13	15	9	9	10
2470	Adenylate kinase 1;Adenylate kinase isoenzyme 1;ATP-AMP transphosphorylase 1;Myokinase	28.18	28.824	28.8871	29.5773	30.0398	29.7456	29.4518	29.8491	29.8843	+				8	7	7	7	7	7	7	7	7	8	48.6	48.6	23.411	1.0534e-127	304110000	475200000	496460000	4.25257e+08	801070000	1103800000	900140000	9.35003e+08	734280000	967110000	990970000	8.97453e+08	0.454818	0.473848	1.04184	8	10	11	10	13	11
2582	14 kDa laminin-binding protein;14 kDa lectin;Beta-galactoside-binding lectin L-14-I;Galaptin;Galectin-1;HBL;HPL;Lactose-binding lectin 1;Lectin galactoside-binding soluble 1;Putative MAPK-activating protein PM12;S-Lac lectin 1	32.1952	32.9471	32.994	33.6798	33.5368	33.4197	33.7149	33.5901	33.7439	+				8	6	6	6	7	6	6	6	6	7	76.3	76.3	14.716	0	4917100000	8280500000	8554200000	7250600000	13760000000	12462000000	11490000000	1.25707e+10	14099000000	12931000000	14385000000	13805000000	0.576787	0.525216	0.910588	27	29	29	51	38	39
3159	Rho GDP-dissociation inhibitor 1;Rho-GDI alpha;cDNA FLJ50748, highly similar to Rho GDP-dissociation inhibitor 1;Putative uncharacterized protein ARHGDIA	30.0756	29.421	29.8578	30.2983	30.9195	30.8959	31.0101	31.0115	31.8377	+				8	5	6	6	8	5	8	7	8	7	70.1	70.1	23.207	2.1336e-251	1131500000	718810000	972980000	9.41097e+08	1320400000	2031000000	1998000000	1.78313e+09	2162600000	2164700000	3838100000	2721800000	0.527777	0.345763	0.65513	11	10	11	27	9	14
4980	14 kDa thioredoxin-related protein;Protein 42-9-9;Thioredoxin domain-containing protein 17;Thioredoxin-like protein 5	29.2612	29.2926	30.1711	30.6294	30.6538	30.9739	31.2967	30.782	30.9473	+				8	7	7	7	8	7	7	8	8	7	60.2	60.2	13.941	4.4793e-183	643430000	657570000	1208900000	8.36633e+08	1661000000	1689300000	2109000000	1.81977e+09	2637800000	1846300000	2070400000	2.18483e+09	0.459748	0.382928	0.832909	10	11	18	47	23	27
183	Putative uncharacterized protein PLRG1;Pleiotropic regulator 1	28.6988	28.6399	28.0496	27.6407	27.6553	27.4391	27.6025	27.1598	27.5033	+				9	8	7	6	3	3	3	3	5	5	34.2	34.2	57.181	1.9687e-160	435700000	418290000	277830000	3.77273e+08	209250000	211390000	181970000	200870000	203790000	149940000	190250000	1.81327e+08	1.8782	2.08063	1.10778	13	11	8	4	4	3
2049	Pirin	26.8377	27.4998	27.7022	28.4696	28.6277	28.7227	28.1222	27.9005	28.1674	+				9	3	4	3	5	5	6	5	7	5	52.8	52.8	32.113	1.6244e-40	119940000	189790000	218370000	1.76033e+08	371700000	414750000	442990000	4.09813e+08	292170000	250540000	301470000	2.81393e+08	0.429545	0.625577	1.45637	3	4	4	6	7	8
4021	Rho guanine nucleotide exchange factor 16	26.8094	27.7917	26.9255	28.2441	28.0848	28.1105	28.6433	28.4933	28.5975	+				9	3	5	4	6	6	6	6	8	5	20.3	20.3	80.104	1.11e-86	117610000	232350000	127460000	159140000	317930000	284690000	289800000	2.97473e+08	419280000	377870000	406170000	4.01107e+08	0.534972	0.396752	0.741631	2	8	4	7	9	7
4214	Pogo transposable element with ZNF domain	27.5236	27.2743	26.7986	26.327	26.2427	26.1291	26.1745	25.5385	26.0468	+				9	5	7	4	5	4	3	4	4	2	11.2	11.2	155.34	3.5149e-58	192940000	162320000	116730000	157330000	84182000	79402000	73392000	78992000	75740000	48735000	69322000	64599000	1.99172	2.43549	1.22281	5	8	4	5	4	3
4734	CoaC;Phosphopantothenoylcysteine decarboxylase	26.7693	27.2159	27.5601	28.1163	28.1137	27.9005	28.491	28.1486	28.0959	+				9	4	4	5	8	7	5	6	8	7	71.1	71.1	22.395	3.8553e-166	114380000	155880000	197890000	156050000	290960000	290440000	250550000	2.77317e+08	377270000	297570000	286880000	3.20573e+08	0.562714	0.486784	0.865065	4	4	6	9	8	7
5084	Chitinase domain-containing protein 1;Stabilin-1-interacting chitinase-like protein	26.8875	27.111	26.5908	26.3613	26.229	26.2349	26.4296	26.2642	26.4273	+				9	6	6	5	5	5	4	3	4	3	32.8	32.8	47.615	0	124150000	144950000	101070000	123390000	86207000	78651000	78977000	8.12783e+07	90386000	80595000	90240000	8.70737e+07	1.51812	1.41708	0.933443	7	7	6	7	7	4
5723	Apoptosis-associated speck-like protein containing a CARD;Caspase recruitment domain-containing protein 5;PYD and CARD domain-containing protein;Target of methylation-induced silencing 1	30.3213	30.8195	31.2875	31.6059	32.1185	32.0422	31.8279	32.2731	32.1627	+				9	5	6	6	6	7	7	6	9	7	59	59	21.627	2.0141e-220	1341600000	1895000000	2621100000	1.95257e+09	3268200000	4662800000	4422500000	4.11783e+09	3812100000	5190100000	4807700000	4603300000	0.474173	0.424167	0.894539	9	13	15	14	20	17
5918	Phosphohydroxythreonine aminotransferase;Phosphoserine aminotransferase	28.8549	29.3627	28.565	28.0016	27.5022	27.5415	27.8967	27.3297	27.7905	+				9	6	7	6	3	3	4	2	3	4	28.4	28.4	40.422	6.0801e-65	485490000	690350000	397130000	5.24323e+08	268740000	190100000	195350000	2.18063e+08	249880000	168680000	232150000	2.16903e+08	2.40445	2.41731	1.00535	7	7	7	4	3	4
418	cDNA FLJ60124, highly similar to Mitochondrial dicarboxylate carrier;cDNA FLJ61034, highly similar to Mitochondrial dicarboxylate carrier	31.7936	31.873	31.513	31.1915	31.295	31.2395	31.406	31.4173	31.52	+				10	9	8	6	6	7	6	7	9	7	31.9	31.9	48.099	0	3722500000	3933000000	3064600000	3.57337e+09	2452300000	2634700000	2535200000	2.54073e+09	2845500000	2867800000	3079400000	2930900000	1.40643	1.2192	0.866878	18	19	14	12	15	13
482	cDNA FLJ54536, highly similar to Mitochondrial 28S ribosomal protein S27;28S ribosomal protein S27, mitochondrial	27.7755	28.3489	27.3043	26.5586	26.4624	26.3059	26.3267	26.7116	26.3776	+				10	5	9	6	3	2	4	3	4	2	31.3	31.3	49.149	3.012e-131	229750000	341880000	165740000	245790000	98843000	92466000	82961000	9.14233e+07	84162000	109900000	87189000	9.37503e+07	2.68848	2.62175	0.975179	8	12	8	5	4	5
703	cDNA FLJ55884, highly similar to RNA-binding protein 16;CDC5L complex-associated protein 7;Putative RNA-binding protein 16;RNA-binding motif protein 16;SR-like CTD-associated factor 8	28.1861	28.9259	28.3932	27.8085	27.6956	27.5111	27.2333	27.4857	27.6209	+				10	8	7	7	6	7	5	5	4	7	11.7	11.7	147.34	4.2888e-106	305390000	509990000	352550000	389310000	235070000	217380000	191280000	2.14577e+08	157780000	187940000	206410000	1.84043e+08	1.81432	2.11532	1.1659	9	9	11	7	10	6
1903	Aminoacylproline aminopeptidase;Cytosolic aminopeptidase P;Soluble aminopeptidase P;Xaa-Pro aminopeptidase 1;X-Pro aminopeptidase 1;X-prolyl aminopeptidase 1, soluble;X-prolyl aminopeptidase (Aminopeptidase P) 1, soluble	26.7244	27.4867	27.2242	28.2403	27.9374	27.9468	28.3151	28.6358	27.9952	+				10	6	6	5	6	6	6	5	4	6	23.6	23.6	74.797	3.3163e-43	110880000	188070000	156780000	151910000	317090000	257040000	258720000	2.77617e+08	333970000	417090000	267540000	3.39533e+08	0.547193	0.447408	0.817642	6	7	6	10	7	8
3073	Deoxyhypusine synthase	25.5342	26.3412	26.4603	27.0386	27.5657	27.4066	27.0019	27.5625	27.4091	+				10	3	4	5	7	9	9	8	7	7	41.2	41.2	40.97	5.6382e-179	48590000	85017000	92331000	7.53127e+07	137860000	198660000	177920000	171480000	134390000	198220000	178220000	1.70277e+08	0.439192	0.442296	1.00707	3	5	5	7	11	11
3230	C-terminal binding protein 2;C-terminal-binding protein 2	29.7195	29.1569	28.8815	28.6754	28.4167	28.6419	28.062	28.0569	28.3302	+				10	6	9	7	6	7	8	6	5	7	22.8	20.9	106.19	3.6908e-179	884030000	598550000	494540000	659040000	428710000	358330000	418860000	4.01967e+08	280230000	279230000	337470000	2.98977e+08	1.63954	2.20432	1.34448	11	13	9	6	9	10
422	Azoreductase;DT-diaphorase;Menadione reductase;NAD(P)H dehydrogenase [quinone] 1;NAD(P)H:quinone oxidoreductase 1;Phylloquinone reductase;Quinone reductase 1;cDNA, FLJ79145, highly similar to Homo sapiens NAD(P)H dehydrogenase, quinone 1 (NQO1);NAD(P)H dehydrogenase, quinone 1, isoform CRA_b;cDNA FLJ50573, highly similar to Homo sapiens NAD(P)H dehydrogenase, quinone 1 (NQO1), transcript variant …	30.5093	30.8701	30.7026	31.1122	31.2958	31.2506	31.126	31.1141	31.0513	+				11	8	9	8	8	10	9	8	9	10	36.1	36.1	30.867	5.5596e-181	1528300000	1962600000	1747500000	1.74613e+09	2321100000	2636100000	2554900000	2.50403e+09	2343400000	2324200000	2225200000	2297600000	0.697328	0.759981	1.08985	20	14	15	15	20	17
1115	COP9 signalosome complex subunit 6;JAB1-containing signalosome subunit 6;MOV34 homolog;Vpr-interacting protein	28.9017	28.7937	28.9435	29.0529	29.0678	29.1313	29.1329	29.4755	29.3262	+				11	5	7	9	8	9	11	8	7	7	49.2	49.2	36.163	1.1946e-173	501500000	465330000	516240000	4.94357e+08	556930000	562700000	588030000	569220000	588660000	746490000	673090000	6.69413e+08	0.868481	0.738492	0.850327	6	8	10	9	10	13
1530	Acid beta-glucosidase;Alglucerase;Beta-glucocerebrosidase;D-glucosyl-N-acylsphingosine glucohydrolase;Glucosylceramidase;Imiglucerase	27.01	26.5886	27.6448	28.3429	28.1809	27.7935	28.3441	28.4013	28.3874	+				11	4	4	4	7	8	7	7	8	8	31.3	31.3	59.716	3.3147e-260	135150000	100920000	209850000	148640000	340450000	304290000	232630000	2.92457e+08	340750000	354520000	351130000	348800000	0.508246	0.426147	0.838465	5	4	7	10	9	9
2362	Annexin A9;Annexin XXXI;Annexin-31;Annexin-9;Pemphaxin	28.3775	28.0101	28.1095	28.2971	28.3231	28.4359	28.6682	28.5915	28.8462	+				11	6	5	4	5	6	4	6	8	7	44.9	44.9	38.363	1.2241e-77	348730000	270330000	289610000	302890000	329830000	335810000	363120000	342920000	426560000	404480000	482580000	4.37873e+08	0.883267	0.69173	0.783149	9	7	6	8	8	5
2514	Adenylate cyclase-inhibiting G alpha protein;Guanine nucleotide-binding protein G(i) subunit alpha-2;cDNA FLJ38980 fis, clone NT2RI2004884, highly similar to Guanine nucleotide-binding protein G(i), alpha-2 subunit;cDNA FLJ39276 fis, clone OCBBF2010843, highly similar to Guanine nucleotide-binding protein G(i), alpha-2 subunit;Guanine nucleotide binding protein (G protein), alpha inhibiting activ…	28.4917	29.1274	29.0038	28.0859	27.85	28.1845	28.2738	28.1132	28.0782	+				11	6	8	6	5	3	5	5	8	5	43.4	40.3	40.45	8.9679e-241	377450000	586430000	538300000	5.00727e+08	284900000	241930000	305060000	2.77297e+08	324540000	290340000	283390000	2.99423e+08	1.80574	1.6723	0.926102	9	11	9	8	5	6
5139	Ubiquitin carrier protein O;Ubiquitin-conjugating enzyme E2 O;Ubiquitin-conjugating enzyme E2 of 230 kDa;Ubiquitin-protein ligase O	26.4407	26.3762	25.8269	27.216	26.8764	27.232	27.0765	26.8717	26.9497	+				11	5	3	4	3	8	6	3	5	4	12.2	12.2	141.29	3.0524e-39	91086000	87104000	59519000	7.92363e+07	155900000	123200000	157630000	1.45577e+08	141530000	122800000	129620000	1.31317e+08	0.544293	0.603399	1.10859	5	3	4	3	10	7
2016	AH receptor-interacting protein;Aryl-hydrocarbon receptor-interacting protein;HBV X-associated protein 2;Immunophilin homolog ARA9	28.061	28.9387	28.6518	29.8981	29.9563	29.8508	30.1089	29.613	29.9073	+				12	6	7	6	10	8	9	10	9	9	45.8	45.8	37.636	3.9371e-190	280030000	514550000	421740000	405440000	1000500000	1041700000	968270000	1003490000	1157900000	821100000	1006900000	995300000	0.40403	0.407355	1.00823	6	9	6	13	13	12
2915	Prohibitin;Putative uncharacterized protein PHB;cDNA FLJ51562, highly similar to Prohibitin	32.0666	32.126	31.8865	31.135	31.4507	31.4908	31.4694	31.1648	31.5645	+				12	10	11	10	10	10	11	9	9	10	64.7	64.7	29.804	0	4497900000	4687100000	3969900000	4.38497e+09	2358200000	2935000000	3017600000	2.77027e+09	2973200000	2407300000	3175900000	2.85213e+09	1.58287	1.53743	0.971296	37	37	32	26	23	29
4942	Gamma-soluble NSF attachment protein;N-ethylmaleimide-sensitive factor attachment protein gamma;cDNA FLJ61104, highly similar to Gamma-soluble NSF attachment protein	28.038	28.4976	28.2852	28.8282	29.0926	28.7677	28.9315	28.8269	28.7762	+				12	5	10	11	11	7	8	10	9	9	38.1	38.1	34.746	5.8683e-136	275600000	379000000	327110000	3.27237e+08	476590000	572470000	457030000	502030000	511970000	476160000	459730000	482620000	0.651827	0.678042	1.04022	7	13	13	12	10	10
66	Putative uncharacterized protein NUDT5;ADP-sugar pyrophosphatase;Nucleoside diphosphate-linked moiety X motif 5;YSA1H	30.1618	30.2685	30.5552	30.8936	30.9557	30.9486	30.7319	30.6183	30.8161	+				13	12	12	12	12	12	12	12	12	13	53.4	53.4	25.895	0	1201200000	1293400000	1577700000	1.35743e+09	1994800000	2082500000	2072300000	2.04987e+09	1783300000	1648300000	1890500000	1.77403e+09	0.662206	0.765168	1.15548	22	24	32	38	27	36
212	Putative uncharacterized protein PSME2;11S regulator complex subunit beta;Activator of multicatalytic protease subunit 2;Proteasome activator 28 subunit beta;Proteasome activator complex subunit 2	30.9354	31.3914	31.5818	32.0973	31.9773	32.0097	32.0494	32.4012	32.1984	+				13	7	10	10	10	8	11	10	9	10	58.7	58.7	29.126	2.9954e-265	2053400000	2816800000	3214200000	2694800000	4594500000	4227900000	4324100000	4.38217e+09	4444600000	5672100000	4928100000	5.01493e+09	0.614947	0.537355	0.873824	25	18	25	30	24	29
310	Calcyclin-binding protein;S100A6-binding protein;Siah-interacting protein;cDNA FLJ36106 fis, clone TESTI2021531, highly similar to Calcyclin-binding protein;Calcyclin binding protein	30.5622	30.5716	29.9491	31.1534	31.0272	31.2258	31.1539	31.0335	31.2603	+				13	8	9	9	11	11	10	10	11	10	57.5	57.5	26.21	3.8371e-246	1585400000	1595800000	1036500000	1405900000	2388400000	2188400000	2511300000	2362700000	2389200000	2197900000	2572100000	2386400000	0.59504	0.58913	0.990069	15	15	13	19	20	21
2928	4-alpha-glucanotransferase;Amylo-alpha-1,6-glucosidase;Dextrin 6-alpha-D-glucosidase;Glycogen debrancher;Glycogen debranching enzyme;Oligo-1,4-1,4-glucantransferase	26.0746	25.4293	25.9224	26.6951	26.3717	26.8024	26.5521	26.5105	26.5148	+				13	3	3	5	9	5	9	5	4	3	14.2	14.2	174.76	2.7667e-94	70671000	45183000	63593000	5.98157e+07	108650000	86832000	117040000	104174000	98393000	95600000	95883000	9.66253e+07	0.57419	0.619047	1.07812	3	3	5	9	5	9
3194	Deubiquitinating enzyme 14;Ubiquitin carboxyl-terminal hydrolase 14;Ubiquitin thioesterase 14;Ubiquitin-specific-processing protease 14;Ubiquitin carboxyl-terminal hydrolase	28.3236	28.3167	28.5272	29.0055	28.7515	28.8828	28.7111	29.014	28.7887	+				13	5	10	9	9	11	12	10	9	10	38.1	38.1	56.068	0	335930000	334330000	386850000	352370000	538920000	451930000	494980000	4.95277e+08	439440000	542110000	463730000	481760000	0.711461	0.731422	1.02806	5	13	11	11	13	14
79	Adenylate cyclase-stimulating G alpha protein;Extra large alphas protein;Guanine nucleotide-binding protein G(s) subunit alpha isoforms XLas;Putative uncharacterized protein GNAS;Guanine nucleotide-binding protein G(s) subunit alpha isoforms short	30.6169	30.7033	30.2792	30.0155	29.8317	29.5364	29.9986	30.05	30.0246	+				14	12	12	12	11	8	11	13	11	11	17	15.9	111.02	6.6706e-168	1646700000	1748300000	1303000000	1566000000	1085300000	955530000	778640000	9.39823e+08	1072700000	1111600000	1092200000	1.09217e+09	1.66627	1.43385	0.860513	17	18	15	15	9	14
2473	Carbonate dehydratase II;Carbonic anhydrase 2;Carbonic anhydrase C;Carbonic anhydrase II	29.964	29.9677	31.0883	31.4009	31.7527	31.4541	31.809	31.7672	32.0707	+				14	9	10	12	11	12	13	13	12	13	68.1	68.1	29.246	3.0365e-220	1047300000	1050000000	2283100000	1.46013e+09	2835400000	3618400000	2941900000	3131900000	3762300000	3654900000	4510600000	3.97593e+09	0.466213	0.367243	0.787714	15	13	24	24	28	20
4189	Basic leucine zipper and W2 domain-containing protein 1;Protein Orf;Putative uncharacterized protein BZW1	26.7671	27.6286	27.937	28.7653	29.003	28.6732	28.689	28.914	29.1465	+				14	2	6	5	8	7	6	7	7	8	29.4	29.4	48.043	7.2761e-23	114210000	207510000	256960000	1.92893e+08	456270000	538000000	428050000	4.74107e+08	432760000	505810000	594270000	5.10947e+08	0.406856	0.377521	0.927899	2	7	7	10	10	8
563	cDNA FLJ54528, highly similar to Serine/threonine-protein kinase MST4 (EC 2.7.11.1);cDNA, FLJ79036, highly similar to Serine/threonine-protein kinase MST4 (EC 2.7.11.1);Mammalian STE20-like protein kinase 4;Mst3 and SOK1-related kinase;Serine/threonine-protein kinase MASK;Serine/threonine-protein kinase MST4;STE20-like kinase MST4;cDNA FLJ90669 fis, clone PLACE1005519, moderately similar to Homo …	27.3218	27.3443	27.0608	27.5386	27.5033	27.7281	27.7268	27.6802	27.6126	+				15	5	8	2	8	7	7	5	6	4	42.9	42.9	49.183	5.678e-201	167760000	170400000	140000000	1.59387e+08	194960000	190240000	222330000	202510000	222130000	215060000	205220000	2.14137e+08	0.787056	0.744322	0.945704	5	9	2	8	7	6
938	Duranin;L-2-hydroxyglutarate dehydrogenase, mitochondrial;Putative uncharacterized protein L2HGDH	29.1256	28.8865	28.6691	28.2959	28.0176	28.1526	28.2889	28.2779	28.3467	+				15	11	12	12	11	10	8	11	10	10	49.5	49.5	50.315	0	585720000	496270000	426850000	5.02947e+08	329550000	271740000	298380000	299890000	327960000	325460000	341360000	3.31593e+08	1.6771	1.51676	0.904391	13	15	16	12	10	9
2144	Branched-chain-amino-acid aminotransferase, mitochondrial;Placental protein 18;Branched-chain-amino-acid aminotransferase	31.4705	31.5663	30.8248	30.5595	29.9983	30.227	30.2303	30.429	30.3656	+				15	14	11	12	13	10	12	9	12	10	51.5	51.5	44.287	0	2975600000	3179900000	1901900000	2685800000	1582400000	1072500000	1256700000	1.30387e+09	1259600000	1445600000	1383400000	1.36287e+09	2.05987	1.9707	0.956709	19	18	16	16	13	15
2499	Annexin A1;Annexin I;Annexin-1;Calpactin II;Calpactin-2;Chromobindin-9;Lipocortin I;p35;Phospholipase A2 inhibitory protein	29.7174	30.1843	29.4147	30.1168	29.7654	30.1034	30.9496	31.725	32.101	+				15	9	10	8	9	7	6	10	12	12	42.8	42.8	38.714	0	882760000	1220100000	715680000	9.39513e+08	1164300000	912570000	1153500000	1076790000	2073700000	3549700000	4606300000	3409900000	0.872513	0.275525	0.315783	12	14	11	12	10	9
2524	Fibronectin receptor subunit beta;Integrin beta-1;VLA-4 subunit beta	29.2959	29.749	29.6983	28.3694	28.7394	28.7963	28.8895	28.9139	29.1112	+				15	10	9	11	4	5	8	7	9	9	26.6	26.6	88.414	2.2665e-135	659070000	902250000	871100000	8.10807e+08	346760000	448150000	466160000	4.20357e+08	497280000	505770000	579900000	527650000	1.92885	1.53664	0.796658	14	11	15	6	5	10
3523	Adapter-related protein complex 1 subunit beta-1;Adaptor protein complex AP-1 subunit beta-1;AP-1 complex subunit beta-1;Beta-1-adaptin;Beta-adaptin 1;Clathrin assembly protein complex 1 beta large chain;Golgi adaptor HA1/AP1 adaptin beta subunit;Putative uncharacterized protein AP1B1	27.5225	27.6962	27.4803	27.958	28.3389	28.156	28.0717	28.1069	27.8632	+				15	9	10	9	12	7	11	10	11	10	39.6	20.9	103.56	0	192790000	217460000	187240000	1.99163e+08	260730000	339510000	299090000	2.99777e+08	282120000	289090000	244150000	2.71787e+08	0.664372	0.732793	1.10299	10	13	10	14	10	12
4396	Glycerol-3-phosphate dehydrogenase 1-like protein;Putative uncharacterized protein GPD1L	28.9483	29.1852	29.5771	29.8492	29.7746	29.7414	29.9732	30.0129	30.1623	+				15	7	11	9	13	9	14	13	13	14	55.6	55.6	38.418	1.1641e-298	517960000	610430000	800910000	643100000	967180000	918440000	897520000	9.27713e+08	1054000000	1083400000	1201600000	1113000000	0.69321	0.577808	0.833525	7	15	13	19	12	18
4936	B-cell receptor-associated protein BAP37;D-prohibitin;Prohibitin-2;Repressor of estrogen receptor activity;cDNA FLJ56579, highly similar to Prohibitin-2;cDNA FLJ60175, highly similar to Prohibitin-2	31.2849	30.8561	30.7707	30.3221	30.4311	30.4354	30.3751	30.2613	30.3977	+				15	11	12	9	11	8	10	10	10	11	58.5	58.5	33.296	0	2616400000	1943600000	1831900000	2.13063e+09	1342300000	1447700000	1452000000	1414000000	1392600000	1286900000	1414600000	1364700000	1.50681	1.56125	1.03613	28	25	24	21	21	22
5709	Megakaryoblastic leukemia 2;MKL/myocardin-like protein 2;Myocardin-related transcription factor B	27.498	27.7797	27.521	27.7469	27.4727	27.5871	27.2186	26.9644	26.9487	+				15	7	11	7	7	6	6	5	3	2	19.9	19.9	118.13	4.3696e-119	189550000	230430000	192590000	204190000	225250000	186250000	201620000	2.04373e+08	156180000	130950000	129530000	1.38887e+08	0.999103	1.47019	1.47151	7	13	10	10	7	8
4	Shootin-1;cDNA FLJ58712, highly similar to Mus musculus myosin, heavy polypeptide 9, non-muscle (Myh9), transcript variant 1, mRNA	29.249	29.37	29.2042	29.5266	29.5983	29.7118	29.1784	29.1699	29.2535	+				16	10	10	8	10	10	11	8	9	9	33.7	33.7	73.608	0	638000000	693820000	618520000	6.50113e+08	773380000	812760000	879340000	8.21827e+08	607540000	603950000	640010000	6.17167e+08	0.791059	1.05338	1.33161	10	11	10	11	12	14
2691	15-hydroxyprostaglandin dehydrogenase [NADP+];Carbonyl reductase [NADPH] 1;NADPH-dependent carbonyl reductase 1;Prostaglandin 9-ketoreductase;Prostaglandin-E(2) 9-reductase;Putative uncharacterized protein CBR1;Carbonyl reductase 1, isoform CRA_c;cDNA FLJ60474, highly similar to Carbonyl reductase	31.2454	31.4367	31.5887	32.0508	31.9434	31.8581	31.7855	31.9216	32.1429	+				16	12	12	13	12	15	14	16	14	14	72.6	72.6	30.375	0	2545700000	2906700000	3229600000	2894000000	4448800000	4129600000	3892700000	4.15703e+09	3701700000	4067700000	4742300000	4.17057e+09	0.69617	0.69391	0.996755	22	24	22	27	24	29
4332	Calcium homeostasis endoplasmic reticulum protein;ERPROT 213-21;SR-related CTD-associated factor 6	29.6608	30.1796	29.5664	28.9271	29.1219	29.1038	28.7386	29.022	28.4441	+				16	11	12	14	8	11	8	7	8	6	23.9	23.9	103.7	2.4138e-102	848760000	1216100000	794990000	9.53283e+08	510430000	584220000	576900000	5.57183e+08	447900000	545100000	365190000	452730000	1.7109	2.10563	1.23072	16	17	20	12	15	12
4425	ADP-ribosylation factor GTPase-activating protein 2;GTPase-activating protein ZNF289;Zinc finger protein 289	28.3321	28.4585	28.817	29.1352	29.4736	29.2326	29.1099	28.9314	29.129	+				16	4	7	7	11	7	9	7	9	9	42.6	42.6	56.72	3.8061e-205	337920000	368870000	472900000	393230000	589610000	745490000	630800000	655300000	579360000	511930000	587090000	559460000	0.600076	0.702874	1.17131	4	9	9	13	9	12
4567	Inhibitor of ASPP protein;NFkB-interacting protein 1;PPP1R13B-like protein;RelA-associated inhibitor	28.07	28.3354	28.3181	28.7917	28.584	28.7857	28.5909	28.8873	28.6719	+				16	7	6	9	13	9	9	11	9	9	30.7	30.7	89.09	1.9225e-143	281780000	338700000	334650000	3.18377e+08	464680000	402370000	462760000	443270000	404320000	496510000	427670000	4.42833e+08	0.718245	0.718954	1.00099	7	8	10	12	10	8
2251	47 kDa mannose 6-phosphate receptor-binding protein;Cargo selection protein TIP47;Mannose-6-phosphate receptor-binding protein 1;Perilipin-3;Placental protein 17	30.3081	30.5056	30.8459	31.0574	31.042	31.1887	31.139	31.1902	31.2383	+				18	15	17	16	17	17	16	14	16	17	66.6	66.6	47.074	0	1329400000	1524400000	1929900000	1.59457e+09	2234600000	2210900000	2447500000	2.29767e+09	2364600000	2450100000	2533200000	2449300000	0.693994	0.65103	0.938091	26	30	31	34	29	31
2593	Leukotriene A(4) hydrolase;Leukotriene A-4 hydrolase	30.2085	29.9021	30.0072	30.321	30.3485	30.4148	30.4599	30.4074	30.5359	+				20	14	15	9	17	14	13	15	15	15	45.2	45.2	69.284	0	1240700000	1003300000	1079100000	1107700000	1341300000	1367100000	1431400000	1.37993e+09	1476900000	1424100000	1556800000	1.48593e+09	0.80272	0.745457	0.928664	20	20	13	22	23	19
2825	Polypyrimidine tract binding protein 1;Polypyrimidine tract binding protein 1, isoform CRA_c;57 kDa RNA-binding protein PPTB-1;Heterogeneous nuclear ribonucleoprotein I;Polypyrimidine tract-binding protein 1	33.3282	33.6586	33.118	32.7054	32.6659	32.7925	32.708	32.7314	32.8772	+				20	18	17	18	18	19	18	16	16	18	57.3	57.3	59.632	0	10784000000	13560000000	9322300000	11222100000	7003600000	6814000000	7439300000	7.08563e+09	7016100000	7130700000	7889000000	7.34527e+09	1.58378	1.5278	0.964653	81	76	68	57	52	59
3684	Sb1.8;Structural maintenance of chromosomes protein 1A	28.0173	28.5242	27.7165	27.1646	27.2797	27.2882	26.9988	27.0966	26.336	+				20	10	13	7	7	4	5	5	4	2	18.1	18.1	143.23	2.2794e-132	271670000	386060000	220550000	292760000	150440000	162930000	163890000	1.59087e+08	134110000	143510000	84706000	1.20775e+08	1.84025	2.424	1.31721	10	14	7	7	5	5
1760	Dnm1p/Vps1p-like protein;Dynamin family member proline-rich carboxyl-terminal domain less;Dynamin-1-like protein;Dynamin-like protein;Dynamin-like protein 4;Dynamin-like protein IV;Dynamin-related protein 1;cDNA FLJ59504, highly similar to Dynamin-1-like protein (EC 3.6.5.5)	28.7587	29.1305	28.7682	29.5327	29.4739	29.3308	29.3492	29.2331	29.1955	+				21	12	14	17	15	14	16	13	18	16	36.3	36.3	87.991	0	454190000	587700000	457190000	4.99693e+08	776640000	745640000	675210000	7.32497e+08	683890000	631010000	614800000	6.43233e+08	0.682178	0.776846	1.13877	14	21	18	21	19	20
5418	GTP-binding protein 9;Obg-like ATPase 1	31.1577	31.4454	31.6017	31.9942	32.0237	31.8392	31.844	31.7585	31.8247	+				21	14	19	13	16	14	13	12	12	15	58.8	58.8	44.743	0	2395500000	2924200000	3258800000	2859500000	4277800000	4366200000	3841900000	4.16197e+09	3854900000	3633100000	3803500000	3.76383e+09	0.687055	0.759731	1.10578	35	34	35	39	34	35
2440	Double-stranded RNA-binding protein Staufen homolog 1;Staufen, RNA binding protein, homolog 1 (Drosophila)	30.0196	29.9449	29.9058	30.4958	30.4523	30.2214	30.1854	30.0392	30.0153	+				22	11	16	13	17	18	12	15	15	10	44.9	44.9	63.182	0	1088400000	1033500000	1005900000	1042600000	1514100000	1469100000	1251800000	1.41167e+09	1221000000	1103300000	1085200000	1136500000	0.73856	0.917378	1.24212	13	19	16	24	23	15
2932	214 kDa nucleoporin;Nuclear pore complex protein Nup214;Nucleoporin Nup214;Protein CAN;Nucleoporin 214kDa	28.1388	28.661	28.5947	28.2468	28.3656	28.015	27.4906	27.7982	27.6161	+				22	13	15	14	13	8	8	9	6	8	18.7	18.7	213.69	0	295550000	424460000	405390000	3.75133e+08	318510000	345860000	271250000	3.11873e+08	188580000	233400000	205720000	2.09233e+08	1.20284	1.79289	1.49055	15	19	18	17	9	11
4087	HGL;Lethal(2) giant larvae protein homolog 2	30.6998	30.2399	30.1056	29.603	29.5575	29.6866	29.6006	29.8919	29.5952	+				22	11	13	13	12	11	11	14	14	15	34.4	34.4	113.45	7.3486e-298	1744100000	1268000000	1155300000	1.38913e+09	815450000	790120000	864060000	823210000	814100000	996250000	811030000	8.73793e+08	1.68746	1.58977	0.942111	20	19	17	15	13	12
2643	Actinin alpha 1 isoform b;Alpha-actinin cytoskeletal isoform;Alpha-actinin-1;F-actin cross-linking protein;Non-muscle alpha-actinin-1;Actinin alpha 1 isoform 3	31.0629	31.0528	30.8088	30.4149	30.5772	30.3861	30.5977	30.4529	30.2695	+				24	16	19	16	17	17	16	16	17	16	51.5	32.7	105.57	0	2243200000	2227500000	1880900000	2117200000	1431500000	1602000000	1403200000	1478900000	1624900000	1469700000	1294300000	1.46297e+09	1.4316	1.4472	1.01089	23	32	28	24	27	23
2672	Aspartate--tRNA ligase;Aspartyl-tRNA synthetase, cytoplasmic;Cell proliferation-inducing gene 40 protein;Putative uncharacterized protein DKFZp781B11202	30.4457	30.421	30.7471	30.9484	31.1099	31.1481	30.9538	31.1134	31.2141	+				24	14	14	19	18	17	20	22	20	17	53.9	53.9	57.136	7.3272e-284	1462400000	1437600000	1802200000	1567400000	2072000000	2317400000	2379600000	2.25633e+09	2079800000	2323100000	2491000000	2.29797e+09	0.694667	0.682081	0.981883	18	19	25	25	24	28
3193	Tyrosyl--tRNA ligase;Tyrosyl-tRNA synthetase, cytoplasmic	30.6264	30.5793	30.3292	30.0448	29.7667	29.9215	30.1282	29.9528	29.7683	+				30	19	21	19	18	13	18	15	17	17	54.2	54.2	59.143	4.7062e-183	1657600000	1604300000	1349000000	1.53697e+09	1107600000	913420000	1016900000	1012640000	1173500000	1039200000	914460000	1.04239e+09	1.51778	1.47447	0.971463	22	23	21	18	13	20
2138	Inositol polyphosphate 4-phosphatase type II;Type II inositol-3,4-bisphosphate 4-phosphatase	29.4749	29.6568	29.915	28.5582	28.7145	29.0294	29.2554	29.5961	29.4517	+				32	22	22	20	12	8	11	11	16	14	45	45	104.74	0	746180000	846400000	1012300000	8.68293e+08	395250000	440490000	547940000	4.61227e+08	640840000	811550000	734270000	7.28887e+08	1.88257	1.19126	0.632782	23	26	26	12	10	13
1251	Myosin-VI;Unconventional myosin-6	30.3643	30.0802	30.1163	30.5758	30.5413	30.7653	30.2515	30.3406	30.2694	+				33	24	20	18	24	20	23	20	21	18	32.9	32.9	148.83	0	1382200000	1135100000	1163900000	1.22707e+09	1600400000	1562600000	1825100000	1662700000	1278200000	1359700000	1294200000	1310700000	0.737996	0.936192	1.26856	34	26	23	32	25	31
1379	Eukaryotic translation initiation factor 4 gamma 1;p220;Putative uncharacterized protein EIF4G1	29.8444	29.4331	29.7547	30.2008	30.2428	30.4271	30.3263	30.1681	30.2359	+				34	21	27	18	20	22	23	21	23	22	28.3	28.3	176.23	0	963970000	724860000	905840000	864890000	1234100000	1270500000	1443700000	1316100000	1346200000	1206400000	1264500000	1.27237e+09	0.657161	0.679749	1.03437	24	31	25	24	29	30
2239	190 kDa paraneoplastic pemphigus antigen;195 kDa cornified envelope precursor protein;Periplakin	30.1696	30.4192	30.1834	29.8702	29.9361	30.028	29.9635	29.7878	29.8437	+				39	21	26	23	20	19	27	21	19	20	31.5	31.5	204.74	0	1207700000	1435800000	1219300000	1287600000	981360000	1027200000	1094800000	1.03445e+09	1046900000	926890000	963470000	9.79087e+08	1.24472	1.3151	1.05655	24	34	30	23	24	31
2687	250/210 kDa paraneoplastic pemphigus antigen;Desmoplakin	28.1318	28.4423	29.0686	30.0899	29.7065	29.558	29.15	29.139	28.911	+				47	9	12	24	33	24	27	18	24	12	22.2	22.2	331.77	0	294120000	364740000	563030000	4.07297e+08	1142800000	876060000	790410000	9.36423e+08	595690000	591160000	504740000	5.63863e+08	0.434949	0.722332	1.66073	9	12	25	35	25	26
1431		17.472	17.5744	16.7974	17.5235	16.8728	26.3121	26.092	25.7773	26.3576			+		2	0	1	1	1	1	2	2	2	2	3.3	3.3	128.46	1.2205e-10	0	0	0	0	0	0	83315000	2.77717e+07	71530000	57508000	85989000	7.16757e+07	3.60079e-08	1.39517e-08	0.387463	0	1	2	1	1	2
1879	39S ribosomal protein L52, mitochondrial;Mitochondrial ribosomal protein L52, isoform CRA_c;Putative uncharacterized protein MRPL52	27.5625	28.4243	26.8947	16.6468	26.463	16.8098	17.1344	18.6277	16.3971			+		2	2	2	2	1	2	1	1	1	1	41.5	41.5	13.664	1.9329e-69	198220000	360210000	124770000	2.27733e+08	0	92501000	0	3.08337e+07	0	0	0	0	7.38587	2.27733e+08	3.08337e+07	3	5	2	1	2	1
2823	Calvasculin;Metastasin;Placental calcium-binding protein;Protein Mts1;Protein S100-A4;S100 calcium-binding protein A4	17.2174	15.8523	16.2967	29.7883	17.2587	29.5113	31.8566	31.4894	32.1755			+		2	0	1	0	2	1	2	2	2	2	18.8	18.8	11.728	0.00029277	0	0	0	0	927180000	0	765200000	5.64127e+08	3888500000	3014800000	4850600000	3.91797e+09	1.77265e-09	2.55234e-10	0.143985	0	1	0	4	2	4
4359	EF-hand domain-containing family member A1	27.0796	26.1038	25.7652	25.6804	16.6337	15.6517	17.5658	17.2807	16.2711			+		2	2	2	2	2	1	1	0	1	0	7.6	7.6	49.666	9.735e-15	141830000	72114000	57031000	90325000	53774000	0	0	1.79247e+07	0	0	0	0	5.03915	90325001	1.79247e+07	3	2	2	2	1	1
387	Dolichyl-phosphate-mannose--protein mannosyltransferase 1;Protein O-mannosyl-transferase 1;cDNA FLJ59530, highly similar to Protein O-mannosyl-transferase 1 (EC 2.4.1.109);Protein-O-mannosyltransferase 1	25.8403	26.2898	26.3604	16.4885	17.3858	25.0852	16.9092	17.1955	17.3211			+		3	2	2	3	1	1	2	1	1	1	5.1	5.1	84.88	1.3466e-16	60077000	82040000	86150000	76089000	0	0	35596000	1.18653e+07	0	0	0	0	6.41271	76089001	1.18653e+07	2	2	3	1	1	2
577	ATPase family AAA domain-containing protein 1;cDNA FLJ54240, highly similar to ATPase family AAA domain-containing protein 1	23.8456	24.7398	24.2224	24.1806	16.8651	17.2185	17.6121	17.2116	16.8682			+		3	2	3	3	2	1	1	1	1	0	10	10	40.744	1.2176e-08	15074000	28017000	19573000	20888000	19015000	0	0	6.33833e+06	0	0	0	0	3.2955	20888001	6.33833e+06	2	4	4	3	2	1
647	39S ribosomal protein L50, mitochondrial;cDNA FLJ52265, highly similar to Homo sapiens mitochondrial ribosomal protein L50 (MRPL50), mRNA	29.6402	29.8183	29.675	28.9055	29.1868	28.2835	28.5758	28.4255	27.5787			+		3	3	3	3	3	3	3	3	3	3	27.2	27.2	18.325	5.267e-90	836760000	946650000	857140000	8.80183e+08	502840000	611090000	326730000	480220000	400100000	360530000	200450000	320360000	1.83288	2.74748	1.499	7	8	9	5	5	6
2054	Acyl-CoA desaturase;Delta(9)-desaturase;Fatty acid desaturase;Stearoyl-CoA desaturase	16.2366	17.2518	17.8978	16.1512	28.0161	27.5883	27.5948	27.8784	28.8665			+		3	0	0	1	0	2	2	2	3	2	15.9	15.9	41.522	1.3236e-30	0	0	0	0	0	271450000	201790000	1.57747e+08	202710000	246740000	489420000	3.12957e+08	6.33928e-09	3.19533e-09	0.504053	0	0	1	0	2	3
2240	Mannosidase alpha class 1A member 2;Mannosyl-oligosaccharide 1,2-alpha-mannosidase IB;Processing alpha-1,2-mannosidase IB	26.1773	26.8565	26.5415	26.0718	16.9757	26.214	17.0726	16.4518	15.7211			+		3	3	2	2	3	1	2	1	1	1	8.1	8.1	73.003	2.3646e-29	75885000	121510000	97675000	9.83567e+07	70535000	0	77839000	49458000	0	0	0	0	1.98869	9.83567e+07	49458001	3	2	3	3	1	2
2391	Cardiac lineage protein 1;Estrogen down-regulated gene 1 protein;Hexamethylene bis-acetamide-inducible protein 1;Menage a quatre protein 1;Protein HEXIM1	26.9815	27.04	27.008	16.8672	17.0772	27.0163	17.7336	15.2798	16.5621			+		3	2	2	2	1	1	3	1	0	1	15.6	15.6	40.623	3.8924e-29	132510000	137990000	134960000	1.35153e+08	0	0	135740000	4.52467e+07	0	0	0	0	2.98703	1.35153e+08	4.52467e+07	2	2	2	1	1	3
2508	Metastatic lymph node gene 19 protein;p185erbB2;Proto-oncogene c-ErbB-2;Proto-oncogene Neu;Receptor tyrosine-protein kinase erbB-2;Tyrosine kinase-type cell surface receptor HER2;cDNA FLJ59426, highly similar to Receptor tyrosine-protein kinase erbB-2 (EC 2.7.10.1)	26.6146	26.444	25.399	26.2055	16.3241	16.3567	16.9825	15.9395	16.5161			+		3	2	2	2	2	1	1	1	2	1	3.5	3.5	137.91	3.4745e-14	102750000	91294000	44246000	79430000	77385000	0	0	25795000	0	0	0	0	3.07928	79430001	25795001	2	2	2	2	1	1
2544	Histone H1;Histone H1(0);Histone H1.0	28.1452	27.0481	25.8562	16.8496	26.774	25.9198	17.9075	16.7556	18.7406			+		3	2	3	2	1	2	2	1	1	1	19.1	19.1	20.863	3.4744e-55	296850000	138770000	60743000	1.65454e+08	0	114760000	63481000	5.94137e+07	0	0	0	0	2.78479	1.65454e+08	5.94137e+07	5	7	2	1	2	2
3744	RNA-binding protein with serine-rich domain 1;SR-related protein LDC2	28.6546	28.9296	28.9559	25.6053	28.0841	28.2084	27.1861	26.0525	27.0418			+		3	3	3	3	2	2	3	2	3	2	15.4	15.4	34.208	1.2164e-39	422550000	511300000	520710000	4.84853e+08	51045000	284540000	310160000	2.15248e+08	152700000	69594000	138160000	1.20151e+08	2.25253	4.03536	1.79148	5	6	5	2	3	5
5018	UPF0557 protein C10orf119	25.7924	26.889	26.426	16.2209	17.0161	25.008	17.2906	16.854	17.332			+		3	2	3	2	1	0	2	1	1	1	7.5	7.5	72.979	0.00013585	58116000	124280000	90158000	9.08513e+07	0	0	33741000	11247000	0	0	0	0	8.07783	9.08513e+07	11247001	2	3	2	1	0	2
5247	Coiled-coil domain-containing protein 86;Cytokine-induced protein with coiled-coil domain	25.1322	25.4494	26.2169	18.1481	17.171	24.786	17.3599	16.7361	17.9393			+		3	2	3	2	0	1	2	1	1	0	11.7	11.7	40.235	3.4305e-18	36774000	45818000	77994000	5.35287e+07	0	0	28929000	9643000	0	0	0	0	5.55104	5.35287e+07	9643001	2	3	2	0	1	2
5538	Transmembrane protein 111;Putative uncharacterized protein TMEM111	26.9976	27.442	27.0951	26.8985	15.7413	16.9164	18.8361	17.3344	16.1565			+		3	2	2	2	2	1	2	1	1	1	15.7	15.7	29.952	1.6128e-08	133990000	182330000	143360000	1.53227e+08	125100000	0	0	41700000	0	0	0	0	3.6745	1.53227e+08	41700001	3	3	3	3	2	3
5592	Spastic paraplegia 4 protein;Spastin	25.5488	25.4144	25.8004	25.171	15.5631	25.8091	15.3244	16.414	15.575			+		3	2	2	3	2	1	2	1	1	1	8.9	8.9	67.196	3.1126e-05	49085000	44721000	58436000	5.07473e+07	37778000	0	58793000	3.21903e+07	0	0	0	0	1.57648	5.07473e+07	3.21903e+07	2	2	3	2	1	2
118	Splicing factor 9G8;Splicing factor, arginine/serine-rich 7;Putative uncharacterized protein SFRS7	28.4345	28.5266	27.694	17.0215	27.5098	17.0135	17.4274	16.9718	16.9092			+		4	3	3	3	1	3	1	1	1	0	20.6	14.7	27.366	6.8216e-41	362770000	386690000	217130000	3.22197e+08	0	191100000	0	63700000	0	0	0	0	5.05803	3.22197e+08	63700001	3	6	4	1	3	1
2234	80 kDa MCM3-associated protein;Protein GANP	24.1957	24.7592	24.8723	17.0123	15.7967	24.2173	17.3824	16.6649	17.444			+		4	3	2	3	1	1	2	1	0	0	3.4	3.4	218.4	4.2453e-08	19214000	28397000	30712000	2.61077e+07	0	0	19504000	6.50133e+06	0	0	0	0	4.01574	2.61077e+07	6.50133e+06	3	2	4	2	1	2
2265	Acetylcholinesterase-associated protein;Brain acetylcholinesterase putative membrane anchor;Protein CutA;Putative uncharacterized protein CUTA	28.2584	28.3318	27.7195	27.759	28.4132	28.8006	29.3152	29.2676	29.5641			+		4	3	3	3	3	2	3	4	3	3	36.9	36.9	20.925	7.2673e-118	321100000	337860000	221010000	2.93323e+08	227140000	357460000	467560000	350720000	667950000	646310000	793720000	702660000	0.836346	0.417447	0.499132	5	6	7	7	5	6
2434	Ribonuclease P protein subunit p29;cDNA FLJ57473, highly similar to Ribonuclease P protein subunit p29 (EC 3.1.26.5);Putative uncharacterized protein POP4	26.2724	25.7771	26.3623	17.2076	25.8046	25.6758	16.6993	16.4344	16.9133			+		4	2	4	3	1	3	2	1	1	1	23.2	23.2	25.424	1.7133e-12	81053000	57501000	86264000	7.49393e+07	0	58608000	53602000	3.74033e+07	0	0	0	0	2.00355	7.49393e+07	3.74033e+07	3	5	4	1	3	2
3767	TNFRSF1A-associated via death domain;Tumor necrosis factor receptor type 1-associated DEATH domain protein	16.6377	16.7223	16.2116	16.4373	25.1022	25.3686	25.8735	26.1161	26.0988			+		4	1	0	1	2	2	3	3	3	2	18.9	18.9	34.247	3.7753e-32	0	0	0	0	0	36018000	43321000	2.64463e+07	61476000	72732000	71864000	6.86907e+07	3.78124e-08	1.4558e-08	0.385006	1	0	1	3	2	3
3857	M1G-methyltransferase;tRNA (guanine-N(1)-)-methyltransferase;tRNA [GM37] methyltransferase;tRNA methyltransferase 5	24.6868	24.5529	24.8651	24.3934	16.818	17.1766	18.2983	15.9529	17.5768			+		4	2	2	4	2	1	1	1	1	0	14.7	14.7	58.246	1.3499e-33	27006000	24612000	30559000	2.73923e+07	22036000	0	0	7.34533e+06	0	0	0	0	3.72922	2.73923e+07	7.34533e+06	2	2	4	2	1	1
4107	Round spermatid basic protein 1-like protein	25.8059	26.0271	25.6504	16.0887	25.3468	16.8782	16.9617	16.3369	17.0212			+		4	4	3	2	1	2	1	0	1	0	7.3	7.3	94.868	1.2299e-28	58660000	68380000	52667000	5.99023e+07	0	42674000	0	1.42247e+07	0	0	0	0	4.21116	5.99023e+07	1.42247e+07	4	3	2	1	2	1
4456	Protein FAM98A;cDNA FLJ52744, highly similar to Protein FAM98A	15.2045	18.3774	16.6651	16.7595	26.799	26.2678	27.0626	26.4863	27.0909			+		4	1	1	1	1	3	3	3	2	2	17.7	11.4	55.4	6.034e-165	0	0	0	0	0	116760000	80796000	65852000	140170000	94011000	142950000	1.2571e+08	1.51856e-08	7.9548e-09	0.523839	1	1	1	1	3	3
4956	Growth/differentiation factor 15;Macrophage inhibitory cytokine 1;NSAID-activated gene 1 protein;NSAID-regulated gene 1 protein;Placental bone morphogenetic protein;Placental TGF-beta;Prostate differentiation factor	18.22	16.4345	16.0445	26.6101	26.3244	17.4561	27.0795	27.3838	27.2741			+		4	0	0	0	2	2	3	2	3	2	19.5	19.5	34.14	1.1243e-10	0	0	0	0	102430000	84029000	0	62153000	141820000	175130000	162300000	159750000	1.60893e-08	6.25978e-09	0.389064	0	0	0	2	2	2
5019	Protein FAM103A1	27.721	26.3008	26.8379	17.1845	26.151	26.4532	15.7191	17.2568	16.779			+		4	2	2	3	1	2	3	0	2	1	50	50	14.381	1.4363e-92	221230000	82666000	119950000	141282000	0	74513000	91875000	5.54627e+07	0	0	0	0	2.54734	141282001	5.54627e+07	3	2	4	1	2	3
5053	THUMP domain-containing protein 3	17.0385	17.4832	17.909	16.8902	25.3081	17.4501	25.8524	25.0931	24.8006			+		4	1	1	1	2	2	2	2	3	2	9.7	9.7	57.002	1.7063e-19	0	0	0	0	0	41543000	0	1.38477e+07	60582000	35791000	29223000	4.18653e+07	7.22143e-08	2.38861e-08	0.330767	1	1	2	2	2	2
5544	39S ribosomal protein L27, mitochondrial;cDNA FLJ13514 fis, clone PLACE1005557, highly similar to Homo sapiens mitochondrial ribosomal protein L27 (MRPL27), nuclear gene encoding mitochondrial protein, transcript variant 2, mRNA;Mitochondrial ribosomal protein L27, isoform CRA_a	26.3417	26.6477	25.9598	16.4888	17.1406	24.9008	15.4974	16.6654	17.7145			+		4	3	2	3	1	2	2	1	0	1	29.1	29.1	16.073	3.0743e-48	85046000	105140000	65263000	8.51497e+07	0	0	31325000	1.04417e+07	0	0	0	0	8.1548	8.51497e+07	1.04417e+07	3	3	3	1	2	2
5856	NOC2-like protein;Nucleolar complex protein 2 homolog	28.6918	28.7533	28.5402	17.2137	26.6602	16.773	17.2183	16.3389	17.7634			+		4	3	2	3	1	2	1	1	1	1	6	6	84.918	1.0168e-06	433610000	452470000	390350000	4.25477e+08	0	106050000	0	35350000	0	0	0	0	12.0361	4.25477e+08	35350001	4	4	4	1	2	2
269	CD55 molecule, decay accelerating factor for complement (Cromer blood group);Decay-accelerating factor splicing variant 1;Decay-accelerating factor splicing variant 3;Complement decay-accelerating factor;Decay-accelerating factor splicing variant 2;CD55 antigen, decay accelerating factor for complement (Cromer blood group), isoform CRA_d	25.8394	26.2713	25.955	26.1677	17.1949	16.3371	27.1364	26.7213	27.1168			+		5	2	2	3	3	1	2	2	3	2	17.6	17.6	49.338	1.8586e-17	60040000	80993000	65047000	6.86933e+07	75381000	0	0	25127000	147530000	110640000	145540000	134570000	2.73385	0.510465	0.186721	2	2	3	3	1	2
1295	Cathepsin H;Cathepsin H heavy chain;Cathepsin H light chain;Cathepsin H mini chain	26.6553	27.0169	27.1681	27.7232	27.7326	27.0233	28.1579	27.8699	27.915			+		5	2	4	2	3	3	3	3	3	4	16.4	16.4	37.393	2.5369e-68	105690000	135800000	150800000	1.30763e+08	221570000	223020000	136400000	1.93663e+08	299480000	245290000	253070000	2.65947e+08	0.67521	0.49169	0.728204	2	4	3	4	3	2
1330	RNA-binding motif protein 28;RNA-binding protein 28	26.0662	26.0526	25.3116	18.2114	17.3271	25.7904	16.663	17.4878	16.7952			+		5	3	5	4	0	0	2	1	1	1	8.8	8.8	85.737	2.2287e-157	70260000	69603000	41643000	60502000	0	0	58036000	1.93453e+07	0	0	0	0	3.12747	60502001	1.93453e+07	3	8	4	0	0	2
1774	Exocyst complex component 5;Exocyst complex component Sec10	25.7293	25.5606	25.7803	25.4553	16.679	17.5208	25.2754	25.1765	25.3847			+		5	2	3	3	4	1	1	3	2	3	7.9	7.9	81.852	1.2241e-09	55629000	49489000	57631000	5.42497e+07	46005000	0	0	15335000	40611000	37920000	43808000	4.07797e+07	3.53764	1.33031	0.376045	2	3	3	4	1	1
1836	NOGO-interacting mitochondrial protein;Reticulon-4-interacting protein 1, mitochondrial	27.4326	27.6167	27.5088	27.158	16.9339	27.1028	26.7017	26.5802	26.577			+		5	3	4	4	3	1	2	2	2	2	19.2	19.2	43.589	1.1108e-50	181150000	205800000	190970000	192640000	149750000	0	144130000	97960000	109150000	100330000	100110000	1.03197e+08	1.96652	1.86673	0.949255	3	4	4	3	1	2
1887	BRG1-associated factor 47;Integrase interactor 1 protein;SNF5 homolog;SWI/SNF-related matrix-associated actin-dependent regulator of chromatin subfamily B member 1;Putative uncharacterized protein SMARCB1	27.0995	27.0314	26.9951	25.8267	26.4346	26.3958	25.9927	26.5614	26.1073			+		5	2	4	5	2	3	5	2	3	2	21.6	21.6	45.05	4.6528e-31	143800000	137170000	133760000	1.38243e+08	59514000	90698000	88295000	7.95023e+07	66772000	99033000	72290000	79365000	1.73886	1.74187	1.00173	3	4	5	2	3	5
1991	4Ig-B7-H3;B7 homolog 3;CD276 antigen;Costimulatory molecule	25.8512	26.1197	27.6533	16.7297	16.4307	26.19	18.0655	16.068	16.3907			+		5	3	5	2	1	1	2	1	1	1	29.2	29.2	57.235	3.3169e-174	60533000	72912000	211090000	114845000	0	0	76557000	25519000	0	0	0	0	4.50037	114845001	25519001	3	5	3	2	2	3
2476	Erythroid-potentiating activity;Fibroblast collagenase inhibitor;Metalloproteinase inhibitor 1;Tissue inhibitor of metalloproteinases 1;TIMP metallopeptidase inhibitor 1	17.1516	16.5972	15.9069	26.8998	26.9791	17.2374	27.0584	27.3517	28.1634			+		5	1	1	0	4	3	1	5	5	4	40.1	40.1	23.171	2.6132e-62	0	0	0	0	125210000	132290000	0	8.58333e+07	139760000	171270000	300620000	2.03883e+08	1.16505e-08	4.90477e-09	0.420992	1	1	0	4	3	1
3074	39S ribosomal protein L15, mitochondrial;39S ribosomal protein L19, mitochondrial	28.0331	27.586	27.5125	26.4169	16.5538	26.7124	26.6352	26.6925	26.5896			+		5	4	5	3	3	1	3	2	2	3	15.4	15.4	33.535	2.8892e-16	274660000	201470000	191460000	222530000	89592000	0	109960000	6.65173e+07	104230000	108450000	100990000	1.04557e+08	3.34544	2.12832	0.636185	4	6	4	4	1	3
3563	Cytokine IK;IK factor;Protein Red;Protein RER;Clone TCCCIA00142 mRNA sequence	28.6264	29.0583	28.4577	27.3103	27.6928	16.3819	27.5853	27.6965	27.92			+		5	4	4	3	4	3	1	2	3	2	11	11	65.601	6.6173e-20	414380000	559020000	368650000	447350000	166430000	216950000	0	1.27793e+08	201370000	217510000	253950000	2.24277e+08	3.50057	1.99463	0.569802	5	6	4	4	3	1
3737	NDR1 protein kinase;Nuclear Dbf2-related kinase 1;Serine/threonine-protein kinase 38	26.1349	26.0307	26.0736	26.0339	25.849	17.374	26.5736	26.5185	26.4065			+		5	3	3	3	2	3	1	2	3	5	15.1	15.1	54.19	7.9228e-82	73685000	68554000	70622000	7.09537e+07	68705000	60441000	0	4.30487e+07	99875000	96128000	88950000	9.49843e+07	1.64822	0.747004	0.453219	3	3	3	2	3	1
3923	Adracalin;Aladin;Achalasia variant	24.9695	24.7092	24.5234	17.1645	23.241	23.9183	17.5151	16.7467	16.469			+		5	2	3	3	2	3	2	1	1	1	22.9	22.9	59.573	2.5214e-73	32853000	27428000	24114000	2.81317e+07	0	9913700	15853000	8588900	0	0	0	0	3.27535	2.81317e+07	8588901	2	3	3	2	3	2
4056	60S ribosomal protein L7-like 1	25.3811	26.0522	25.0707	17.5147	16.6306	24.2968	16.8194	17.2523	15.9998			+		5	3	4	2	1	0	3	0	1	1	28.9	28.9	28.661	4.0678e-17	43699000	69579000	35239000	4.95057e+07	0	0	20609000	6.86967e+06	0	0	0	0	7.20641	4.95057e+07	6.86967e+06	3	4	2	1	0	3
4759	Protein KTI12 homolog	17.4198	16.2209	16.1966	17.0136	25.0759	24.2878	25.2178	24.4742	25.6079			+		5	0	1	1	1	2	2	3	4	2	31.4	31.4	38.615	1.4814e-34	0	0	0	0	0	35366000	20482000	18616000	39022000	23306000	51140000	3.78227e+07	5.37172e-08	2.64392e-08	0.492192	0	1	1	2	2	2
4921	Adipophilin;Adipose differentiation-related protein;Perilipin-2	17.0783	17.4594	16.6556	17.4018	17.58	25.8238	26.687	27.2408	28.1667			+		5	0	0	0	1	1	3	4	3	5	22.4	22.4	48.075	1.9139e-42	0	0	0	0	0	0	59395000	1.97983e+07	108040000	158600000	301310000	1.89317e+08	5.05093e-08	5.28216e-09	0.104578	0	0	0	1	3	4
5027	Alpha-L-fucoside fucohydrolase 2;Plasma alpha-L-fucosidase	17.0091	16.2074	17.761	25.7675	15.8603	25.1073	25.6504	25.1047	25.7029			+		5	1	0	0	3	0	4	3	3	4	19.3	19.3	54.066	1.5976e-80	0	0	0	0	57121000	0	36145000	3.10887e+07	52666000	36080000	54619000	4.77883e+07	3.21661e-08	2.09256e-08	0.650549	1	0	0	3	0	4
5037	Uncharacterized protein C9orf142	27.2007	27.2524	27.2668	26.6351	27.1998	27.3193	27.4616	27.4669	27.587			+		5	5	4	3	4	3	4	3	5	3	33.8	33.8	21.639	1.8296e-157	154250000	159880000	161480000	1.58537e+08	104220000	154150000	167470000	1.41947e+08	184830000	185510000	201610000	190650000	1.11687	0.831559	0.744541	5	5	4	4	3	4
5187	Activating signal cointegrator 1 complex subunit 2;ASC-1 complex subunit p100;Trip4 complex subunit p100	16.5534	17.3486	15.5988	26.4011	18.0264	27.3454	25.9569	26.8681	26.2907			+		5	1	1	1	4	1	3	2	2	2	7.5	7.5	86.359	7.4153e-16	0	0	0	0	88619000	0	170530000	86383000	65135000	122490000	82090000	89905000	1.15764e-08	1.11229e-08	0.960825	1	1	1	4	1	3
5850	F-box only protein 7;F-box protein 7	25.5238	24.7442	25.6035	25.9817	16.9638	25.9885	17.2212	16.9005	16.2985			+		5	4	2	3	4	1	2	1	1	1	17.2	17.2	58.502	5.6716e-19	48243000	28103000	50983000	42443000	66265000	0	66577000	4.42807e+07	0	0	0	0	0.9585	42443001	4.42807e+07	4	2	4	5	1	2
205	Putative uncharacterized protein ZNF326;Zinc finger protein 326	26.8376	27.0791	26.8684	16.7672	17.319	25.5434	16.1559	17.0411	16.4971			+		6	3	5	3	1	0	2	1	0	0	15.6	15.6	65.695	3.773e-34	119930000	141780000	122520000	1.28077e+08	0	0	48903000	16301000	0	0	0	0	7.85698	1.28077e+08	16301001	3	5	3	1	0	2
1568	Kinesin-like protein KIF2;Kinesin-like protein KIF21A;Renal carcinoma antigen NY-REN-62	16.4297	16.9592	16.6836	25.5488	16.9299	25.6705	25.8926	26.2408	25.6003			+		6	0	1	1	3	1	2	3	4	2	6.5	6.5	187.46	6.022e-65	0	0	0	0	49085000	0	53406000	3.41637e+07	62293000	79297000	50869000	64153000	2.92709e-08	1.55877e-08	0.532534	0	1	1	3	1	2
3269	Ras-related protein Rab-10	28.5763	28.6499	28.4529	28.7521	28.3624	28.8592	28.8657	29.0429	29.1337			+		6	6	6	4	5	3	5	5	5	5	48	36	22.541	2.5736e-136	400240000	421190000	367430000	3.96287e+08	452110000	345080000	486940000	4.28043e+08	489150000	553080000	589000000	5.43743e+08	0.92581	0.728812	0.787216	8	8	6	6	4	7
3390	28S ribosomal protein S28, mitochondrial;28S ribosomal protein S35, mitochondrial	27.5325	27.819	27.4637	26.2798	27.2695	27.0199	26.978	27.1237	27.0943			+		6	5	6	6	5	4	3	4	4	3	31.3	31.3	36.844	2.0715e-116	194140000	236780000	185090000	2.05337e+08	81470000	161780000	136080000	1.26443e+08	132190000	146230000	143280000	1.40567e+08	1.62394	1.46078	0.899526	7	11	7	6	6	4
4755	Nucleoporin SEH1;Nup107-160 subcomplex subunit SEH1;SEC13-like protein	27.5505	27.1663	27.1428	16.9902	26.5501	16.7938	17.9244	16.6821	16.3437			+		6	3	4	2	1	2	1	1	2	1	24.9	24.9	46.578	3.0259e-34	196570000	150620000	148180000	1.65123e+08	0	98261000	0	3.27537e+07	0	0	0	0	5.04137	1.65123e+08	3.27537e+07	4	5	3	2	3	2
5181	Anaphase-promoting complex subunit 1;Cyclosome subunit 1;Mitotic checkpoint regulator;Testis-specific gene 24 protein	26.0311	25.8003	26.399	15.8653	17.3897	25.6603	16.9003	16.1551	15.4064			+		6	2	4	4	1	0	3	0	1	0	5.8	5.8	216.5	1.157e-24	68573000	58434000	88488000	7.18317e+07	0	0	53028000	17676000	0	0	0	0	4.0638	7.18317e+07	17676001	2	4	4	1	0	3
5302	Peptide deformylase, mitochondrial;Polypeptide deformylase	26.8335	26.6245	26.0089	25.3949	16.5688	25.5206	15.8507	15.982	16.9158			+		6	3	6	2	4	1	2	1	1	1	35	35	27.013	3.1753e-20	119590000	103460000	67523000	9.68577e+07	44119000	0	48134000	30751000	0	0	0	0	3.14974	9.68577e+07	30751001	3	6	2	4	1	2
5629	AF4/FMR2 family member 4;ALL1-fused gene from chromosome 5q31 protein;Major CDK9 elongation factor-associated protein	25.3227	24.81	25.7189	24.7196	18.161	24.5946	18.1081	16.3369	16.8888			+		6	2	3	4	4	0	2	0	0	2	7.3	7.3	127.46	0	41966000	29413000	55229000	4.22027e+07	27628000	0	25335000	1.76543e+07	0	0	0	0	2.3905	4.22027e+07	1.76543e+07	2	4	4	3	0	2
5880	Glycine-rich protein;U6 snRNA-associated Sm-like protein LSm4	30.6984	31.0223	31.0445	30.1797	30.4803	29.6448	30.3101	30.0836	29.7827			+		6	6	6	4	6	3	5	4	5	5	46	46	15.35	1.3118e-92	1742400000	2181000000	2214700000	2.04603e+09	1216200000	1497900000	839400000	1184500000	1331200000	1137800000	923610000	1130870000	1.72734	1.80926	1.04742	11	12	12	10	7	6
65	Septin-8;Putative uncharacterized protein SEPT8	30.2007	30.2655	30.0864	30.4235	30.1316	30.475	30.6028	30.4295	30.5634			+		7	5	6	5	5	5	7	5	6	5	34.6	24.4	55.756	0	1234000000	1290700000	1140000000	1.22157e+09	1440100000	1176300000	1492400000	1369600000	1630600000	1446100000	1586700000	1.55447e+09	0.891915	0.785843	0.881074	9	11	9	9	9	11
68	Sodium/potassium-dependent ATPase subunit beta-1;Sodium/potassium-transporting ATPase subunit beta-1;Putative uncharacterized protein ATP1B1;cDNA, FLJ78942, highly similar to Sodium/potassium-transporting ATPase subunit beta-1	27.3537	27.4266	27.2089	27.27	27.7762	27.4726	28.1511	27.7576	28.1688			+		7	7	7	5	7	5	6	7	7	6	28.7	28.7	35.061	1.0038e-87	171510000	180400000	155130000	1.69013e+08	161840000	229860000	186240000	1.92647e+08	298070000	226920000	301750000	275580000	0.877323	0.6133	0.699059	8	9	7	8	7	8
545	35 kDa nucleoporin;Mitotic phosphoprotein 44;Nuclear pore complex protein Nup53;Nucleoporin Nup35;Nucleoporin NUP53;cDNA FLJ57668, highly similar to Nucleoporin NUP53;Putative uncharacterized protein NUP35	26.8849	27.4815	27.0564	26.3606	26.5869	25.5344	26.2693	26.362	26.0562			+		7	5	6	5	3	4	3	4	5	3	36.5	36.5	34.773	1.5627e-94	123930000	187390000	139570000	1.50297e+08	86163000	100800000	48599000	7.85207e+07	80879000	86246000	69776000	78967000	1.9141	1.90328	0.994348	6	10	8	4	6	4
2527	Alpha-D-galactosidase A;Alpha-D-galactoside galactohydrolase;Alpha-galactosidase A;Melibiase	28.3718	28.3717	28.6313	16.3414	17.0329	26.6811	27.3238	27.5239	27.1679			+		7	4	3	7	1	1	2	4	4	5	23.8	23.8	48.766	1.735e-71	347350000	347330000	415790000	3.70157e+08	0	0	107600000	3.58667e+07	167990000	192990000	150780000	1.70587e+08	10.3204	2.1699	0.210255	4	4	8	1	1	2
3167	Hexokinase type II;Hexokinase-2;Muscle form hexokinase	18.2266	16.5389	16.7351	24.9102	17.9459	25.5676	25.2244	25.6379	26.5195			+		7	0	0	0	2	0	3	3	5	5	14.9	10.8	102.38	2.996e-67	0	0	0	0	31530000	0	49728000	27086000	39200000	52214000	96196000	6.25367e+07	3.69194e-08	1.59906e-08	0.433122	0	0	0	2	0	3
3415	Baculoviral IAP repeat-containing protein 4;E3 ubiquitin-protein ligase XIAP;IAP-like protein;Inhibitor of apoptosis protein 3;X-linked inhibitor of apoptosis protein	16.7096	16.4132	17.6306	27.0707	17.1588	26.5594	26.6682	26.7643	26.9062			+		7	0	0	0	4	1	5	5	4	3	20.7	20.7	56.684	8.2066e-67	0	0	0	0	140960000	0	98897000	7.99523e+07	106640000	113990000	125770000	1.15467e+08	1.25075e-08	8.66051e-09	0.692428	0	0	0	5	1	5
3425	DNA-binding factor KBF2;H2TF1;Lymphocyte translocation chromosome 10 protein;Nuclear factor NF-kappa-B p100 subunit;Nuclear factor NF-kappa-B p52 subunit;Nuclear factor of kappa light polypeptide gene enhancer in B-cells 2;Oncogene Lyt-10	16.1337	16.8918	16.6259	26.7141	24.8241	15.5696	25.213	26.0052	26.5106			+		7	2	2	2	3	3	1	4	2	2	14.4	14.4	96.748	5.3506e-33	0	0	0	0	110090000	29703000	0	4.65977e+07	38892000	67350000	95605000	6.72823e+07	2.14603e-08	1.48627e-08	0.692569	2	2	2	4	3	1
3557	Bifunctional coenzyme A synthase;Dephospho-CoA kinase;Dephospho-CoA pyrophosphorylase;Dephosphocoenzyme A kinase;NBP;Pantetheine-phosphate adenylyltransferase;Phosphopantetheine adenylyltransferase;POV-2	27.9806	27.8825	28.163	28.6139	28.6322	29.2433	28.5581	28.4684	28.7278			+		7	4	4	6	5	7	7	7	6	6	24.3	24.3	65.339	5.0644e-118	264840000	247440000	300540000	270940000	410800000	416050000	635490000	4.87447e+08	395230000	371410000	444560000	4.03733e+08	0.555835	0.671087	1.20735	6	6	9	8	9	11
3806	39S ribosomal protein L23, mitochondrial;L23 mitochondrial-related protein;Ribosomal protein L23-like;Putative uncharacterized protein MRPL23	28.4298	28.8948	28.6548	26.0232	27.8891	27.8373	27.2454	27.7043	27.5151			+		7	6	6	6	4	5	4	4	4	4	40.5	40.5	17.781	5.5067e-73	361600000	499130000	422630000	4.27787e+08	68197000	248570000	239800000	1.85522e+08	159100000	218690000	191810000	1.89867e+08	2.30585	2.25309	0.977119	9	9	8	5	5	5
4575	Mesenchymal stem cell protein DSCD75;UPF0670 protein C8orf55	29.4729	29.4748	29.1949	30.2699	30.1939	29.5535	30.3322	30.2334	30.1992			+		7	6	5	4	7	6	6	7	6	5	38.9	38.9	23.865	2.8788e-60	745110000	746130000	614510000	7.01917e+08	1294600000	1228200000	787950000	1.10358e+09	1351800000	1262300000	1232700000	1.28227e+09	0.636034	0.547403	0.86065	11	8	6	10	8	8
4817	Biorientation defective protein 1;Biorientation of chromosomes in cell division protein 1;Protein FAM44B	26.5969	26.9716	26.819	26.0289	26.353	17.3218	16.6617	16.879	16.6212			+		7	2	5	6	2	2	0	0	0	1	38.9	38.9	19.196	2.9482e-109	101500000	131600000	118390000	1.17163e+08	68466000	85713000	0	51393000	0	0	0	0	2.27975	1.17163e+08	51393001	2	6	7	2	2	0
5076	Threonine--tRNA ligase;Threonyl-tRNA synthetase, mitochondrial;Threonyl-tRNA synthetase-like 1;cDNA FLJ12528 fis, clone NT2RM4000155, moderately similar to THREONYL-TRNA SYNTHETASE, CYTOPLASMIC (EC 6.1.1.3);Threonyl-tRNA synthetase 2, mitochondrial (Putative);Threonyl-tRNA synthetase-like 1, isoform CRA_b	28.2678	28.5287	28.4607	26.7563	27.6897	27.5843	27.3797	27.7524	27.4608			+		7	6	4	4	4	2	3	3	2	3	13.1	13.1	81.035	2.6738e-74	323200000	387260000	369410000	3.59957e+08	113360000	216490000	201230000	1.77027e+08	174630000	226100000	184730000	1.95153e+08	2.03335	1.84448	0.907116	7	6	6	4	3	3
5342	28S ribosomal protein S30, mitochondrial;Programmed cell death protein 9	27.0167	26.8324	26.1012	25.4635	16.9642	25.2606	16.6388	17.5185	16.6795			+		7	3	4	3	2	1	3	1	2	1	20	20	50.364	9.2816e-16	135780000	119500000	71986000	1.09089e+08	46267000	0	40197000	2.88213e+07	0	0	0	0	3.785	1.09089e+08	2.88213e+07	3	5	3	2	1	3
5667	DEAD box protein 41;DEAD box protein abstrakt homolog;Probable ATP-dependent RNA helicase DDX41	25.3072	26.4164	26.0662	15.8563	25.9322	18.12	15.6795	16.5619	18.0607			+		7	2	6	3	2	2	1	1	1	1	17.4	17.4	69.837	3.5023e-12	41517000	89562000	70260000	67113000	0	64030000	0	2.13433e+07	0	0	0	0	3.14445	67113001	2.13433e+07	2	6	3	2	2	1
5722	A-kinase anchor protein 8-like;Helicase A-binding protein 95;Homologous to AKAP95 protein;Neighbor of A-kinase-anchoring protein 95	26.4219	27.0851	26.6057	25.6433	17.3374	17.2503	18.1346	15.6003	18.2951			+		7	2	5	4	2	1	0	1	1	0	15.8	15.8	71.648	1.4523e-20	89904000	142370000	102120000	1.11465e+08	52407000	0	0	17469000	0	0	0	0	6.38071	1.11465e+08	17469001	2	6	5	2	1	0
229	Myoglobin;cDNA FLJ55163, highly similar to Myoglobin;MB protein	28.34	27.8826	28.1851	29.4053	28.7118	28.4734	29.5435	29.0738	29.7022			+		8	3	5	6	5	5	5	6	6	6	64.9	64.9	17.184	3.7807e-255	339770000	247460000	305190000	2.97473e+08	711020000	439660000	372690000	507790000	782470000	565060000	873510000	7.40347e+08	0.58582	0.401803	0.685881	6	7	9	8	9	8
335	L-UBC;UbcH7;Ubiquitin carrier protein L3;Ubiquitin-conjugating enzyme E2 L3;Ubiquitin-conjugating enzyme E2-F1;Ubiquitin-protein ligase L3;Ubiquitin carrier protein	30.5466	30.5158	30.5859	31.7326	31.1865	30.8327	31.3988	31.2335	31.3586			+		8	5	8	6	4	6	7	5	7	7	35.4	35.4	24.003	2.6567e-177	1568400000	1535200000	1611600000	1.57173e+09	3568300000	2443900000	1912400000	2.64153e+09	2831300000	2524800000	2753500000	2703200000	0.595008	0.581434	0.977188	19	19	18	19	17	17
961	B-cell CLL/lymphoma 9-like protein;Protein BCL9-2;Putative uncharacterized protein BCL9L	28.6745	28.7188	28.7095	28.4886	28.9259	28.5405	28.4144	28.3021	28.4223			+		8	6	7	5	5	3	4	4	4	5	14	14	157.13	1.04e-91	428420000	441780000	438940000	436380000	376640000	509990000	390430000	4.25687e+08	357750000	330960000	359720000	3.49477e+08	1.02512	1.24867	1.21807	7	7	5	6	4	4
1616	Chondroitinsulfatase;Galactose-6-sulfate sulfatase;N-acetylgalactosamine-6-sulfatase;N-acetylgalactosamine-6-sulfate sulfatase	27.9118	27.9937	27.7818	28.2131	28.2714	28.0363	28.1793	28.2391	28.3419			+		8	5	5	6	7	5	7	7	7	8	25.7	25.7	58.025	1.8344e-300	252510000	267260000	230750000	2.50173e+08	311160000	324000000	275270000	3.03477e+08	303970000	316830000	340210000	3.20337e+08	0.824358	0.78097	0.947368	6	6	8	8	6	8
1769	50 kDa nuclear polyadenylated RNA-binding protein;Bruno-like protein 2;CUG triplet repeat RNA-binding protein 1;CUG-BP- and ETR-3-like factor 1;CUGBP Elav-like family member 1;Deadenylation factor CUG-BP;Embryo deadenylation element-binding protein homolog;RNA-binding protein BRUNOL-2	30.1173	29.935	30.0198	29.6973	29.3647	29.2352	29.3774	29.5977	29.1525			+		8	6	5	7	6	6	7	7	3	6	22.8	22.8	55.142	2.1387e-139	1164700000	1026400000	1088600000	1.09323e+09	870500000	691280000	631940000	731240000	697420000	812460000	596740000	7.02207e+08	1.49504	1.55685	1.04135	7	7	11	7	8	8
2605	Histone H1.4;Histone H1b;Histone H1.3;Histone H1c;Histone H1.1;Histone H1t;Testicular H1 histone	32.6056	32.2649	32.2414	31.2399	32.3497	31.505	31.7958	31.523	31.4698			+		8	6	8	6	6	6	6	5	6	6	24.7	24.7	21.865	3.9561e-77	6535100000	5160800000	5077200000	5.59103e+09	2536000000	5473000000	3047500000	3685500000	3728200000	3085700000	2974100000	3.26267e+09	1.51704	1.71364	1.1296	19	19	19	13	14	15
2816	Macropain subunit C8;Multicatalytic endopeptidase complex subunit C8;Proteasome component C8;Proteasome subunit alpha type-3	29.6964	29.3002	29.5779	30.1516	29.549	29.9559	30.2517	30.0653	30.124			+		8	6	7	7	6	8	8	6	7	8	32.2	32.2	28.433	4.8629e-100	869970000	661080000	801370000	7.77473e+08	1192700000	785480000	1041400000	1.00653e+09	1278400000	1123500000	1170100000	1.19067e+09	0.772432	0.652973	0.845347	11	11	13	13	11	14
3676	ATP-dependent RNA helicase DHX8;DEAH box protein 8;RNA helicase HRH1	25.1123	24.6548	25.0558	16.9405	16.9023	23.9967	15.7454	16.576	16.0988			+		8	5	3	2	2	2	2	1	0	0	9.4	8.7	139.31	5.6888e-72	36272000	26414000	34879000	3.25217e+07	0	0	16739000	5.57967e+06	0	0	0	0	5.8286	3.25217e+07	5.57967e+06	5	3	2	1	2	2
4063	Uncharacterized protein C2orf79	28.3615	29.2356	29.0818	30.2121	29.6724	29.2995	30.3377	30.2336	30.375			+		8	5	5	4	6	5	6	6	6	6	71.4	71.4	15.805	2.8852e-116	344880000	632120000	568190000	5.15063e+08	1243800000	855630000	660730000	9.20053e+08	1356900000	1262500000	1392500000	1337300000	0.559819	0.385152	0.687993	8	9	8	15	10	10
4120	HEAT repeat-containing protein C7orf27	26.0199	25.7797	26.1475	24.9251	25.3559	25.8074	24.4368	24.8428	25.0091			+		8	5	3	5	3	3	3	3	4	3	20.6	20.6	88.118	2.843e-56	68040000	57604000	74335000	6.66597e+07	31858000	42944000	58723000	4.45083e+07	22709000	30091000	33767000	2.88557e+07	1.49769	2.31011	1.54245	5	3	7	3	3	3
4770	Enhancer of mRNA-decapping protein 3;LSM16 homolog;YjeF domain-containing protein 1;YjeF N-terminal domain-containing protein 2	27.8641	27.9779	27.7671	28.5105	27.9734	28.3111	28.3205	28.1556	28.2672			+		8	3	5	5	5	4	4	3	6	5	28	28	56.077	7.3998e-74	244300000	264360000	228420000	2.45693e+08	382410000	263530000	333030000	3.26323e+08	335220000	299010000	323050000	3.19093e+08	0.752914	0.769973	1.02266	5	7	7	8	7	6
4998	Nucleoside triphosphate phosphohydrolase;Nucleoside-triphosphatase C1orf57;Chromosome 1 open reading frame 57;Chromosome 1 open reading frame 57, isoform CRA_a	27.8206	27.9155	28.0552	27.7455	27.9047	27.5679	27.5469	27.3808	27.5199			+		8	6	6	5	6	5	6	5	5	4	58.9	58.9	20.713	4.1257e-81	237050000	253160000	278900000	256370000	225020000	251270000	198960000	2.25083e+08	196080000	174760000	192450000	1.87763e+08	1.139	1.36539	1.19876	12	10	11	11	9	8
5325	Cadherin EGF LAG seven-pass G-type receptor 2;Cadherin family member 10;Epidermal growth factor-like protein 2;Flamingo homolog 3;Multiple epidermal growth factor-like domains protein 3	26.7073	26.3033	25.9075	15.8675	16.9965	25.1848	16.1139	14.8822	17.9349			+		8	3	4	3	1	2	2	0	1	0	4.2	4.2	317.45	6.5952e-31	109570000	82810000	62940000	8.51067e+07	0	0	38141000	1.27137e+07	0	0	0	0	6.69411	8.51067e+07	1.27137e+07	3	4	3	1	2	2
5331	39S ribosomal protein L47, mitochondrial;Nasopharyngeal carcinoma metastasis-related protein 1	28.8004	28.7036	28.6603	28.1068	28.606	28.3655	28.2304	28.1992	28.3006			+		8	5	6	5	5	5	5	5	4	4	29.2	29.2	29.45	1.0551e-58	467510000	437160000	424230000	4.42967e+08	289070000	408580000	345830000	3.47827e+08	314910000	308180000	330610000	317900000	1.27353	1.39342	1.09414	7	7	8	7	7	7
5604	COP9 signalosome complex subunit 7a;Dermal papilla-derived protein 10;JAB1-containing signalosome subunit 7a	27.6461	27.5179	27.6627	27.7771	27.8123	28.1247	27.9299	27.9718	27.9332			+		8	3	4	4	4	7	6	6	6	5	32.7	32.7	30.276	4.9317e-93	210040000	192180000	212470000	2.04897e+08	230000000	235690000	292680000	252790000	255710000	263240000	256280000	258410000	0.810541	0.792913	0.978252	3	4	4	4	7	6
5775	BCS1-like protein;Mitochondrial chaperone BCS1;Putative uncharacterized protein BCS1L	27.2416	27.2075	26.9386	25.9312	16.1395	26.3855	26.0875	25.9057	25.8825			+		8	7	7	5	2	1	3	3	4	3	30.3	30.3	47.534	8.7912e-132	158690000	154980000	128630000	1.47433e+08	63982000	0	87665000	50549000	71306000	62862000	61861000	65343000	2.91664	2.2563	0.773595	8	8	6	3	2	4
665	cDNA FLJ55988, highly similar to RNA-binding protein Luc7-like 2;cDNA FLJ55994, highly similar to RNA-binding protein Luc7-like 2	28.8872	28.782	28.9342	28.6974	28.0711	28.1493	28.6482	28.4803	28.5214			+		9	5	8	7	5	5	6	6	4	5	21.4	21.4	54.223	7.5992e-200	496480000	461580000	512950000	4.90337e+08	435300000	282000000	297710000	3.38337e+08	420700000	374470000	385290000	3.93487e+08	1.44926	1.24613	0.859843	7	11	8	8	5	8
846	Putative uncharacterized protein NMD3;60S ribosomal export protein NMD3;cDNA FLJ57520, highly similar to Homo sapiens NMD3 homolog (NMD3), mRNA	27.5888	27.2478	27.5723	27.2929	27.9241	28.1947	28.4782	28.3185	28.3358			+		9	3	5	3	6	5	6	7	7	5	27.4	27.4	60.125	1.5231e-115	201860000	159370000	199560000	186930000	164430000	254670000	307230000	242110000	373930000	334750000	338790000	3.49157e+08	0.772087	0.535376	0.693414	3	5	3	6	6	8
1373	ATP-dependent helicase CHD3;Chromodomain-helicase-DNA-binding protein 3;Mi-2 autoantigen 240 kDa protein;Mi2-alpha;Zinc finger helicase	28.5186	28.277	27.6492	27.4546	17.4428	18.4512	16.023	17.8376	16.3528			+		9	2	7	3	2	0	1	1	2	1	8.9	5.7	233.03	7.171e-115	384540000	325250000	210490000	306760000	183930000	0	0	61310000	0	0	0	0	5.00343	306760001	61310001	2	7	3	2	0	1
1434	F-box only protein 20;LIM domain only protein 7;LOMP	16.6415	15.515	16.7702	25.6486	16.9292	17.867	25.8516	25.7308	25.5839			+		9	2	1	1	2	1	1	3	4	5	6.2	6.2	192.69	9.7761e-90	0	0	0	0	52600000	0	0	1.75333e+07	60549000	55687000	50296000	5.55107e+07	5.70342e-08	1.80146e-08	0.315855	2	1	1	2	1	1
1923	TESS;Testin	26.8583	26.8399	26.705	27.2625	26.7501	16.1563	27.4865	27.5131	27.6873			+		9	2	5	2	4	3	1	6	6	4	29	29	48.01	1.4719e-57	121660000	120120000	109400000	117060000	161000000	112870000	0	91290000	188040000	191550000	216120000	198570000	1.28229	0.589515	0.459737	2	6	2	4	3	1
2296	Glioblastoma-amplified sequence;Protein NipSnap homolog 2;Glioblastoma amplified sequence, isoform CRA_a;Putative uncharacterized protein GBAS	29.7645	30.2517	29.9776	30.1471	29.4005	28.9403	28.8151	28.8012	29.0778			+		9	5	8	7	4	5	5	7	6	5	50.3	48.3	33.742	7.9038e-148	912050000	1278400000	1057200000	1082550000	1189000000	708660000	515110000	8.04257e+08	472290000	467750000	566600000	5.02213e+08	1.34603	2.15556	1.60142	6	10	11	6	7	6
3284	10 kDa chaperonin;10 kDa heat shock protein, mitochondrial;Chaperonin 10;Early-pregnancy factor;Heat shock 10kDa protein 1 (Chaperonin 10), isoform CRA_b;Putative uncharacterized protein HSPE1	34.0421	33.9273	34.1243	33.5991	33.9597	33.3996	33.6519	33.6749	33.6471			+		9	8	8	8	8	9	8	7	9	8	62.7	62.7	10.932	3.1826e-163	17688000000	16336000000	18726000000	1.75833e+10	13012000000	16706000000	11331000000	13683000000	13497000000	13714000000	13452000000	1.35543e+10	1.28505	1.29725	1.00949	169	150	151	111	142	93
4766	DnaJ homolog subfamily A member 3, mitochondrial;DnaJ protein Tid-1;Hepatocellular carcinoma-associated antigen 57;Tumorous imaginal discs protein Tid56 homolog	29.3634	29.6337	29.071	26.8329	28.5591	28.1977	28.2697	28.0349	28.0507			+		9	3	7	4	2	4	3	4	3	2	28.1	28.1	52.488	4.3187e-68	690660000	832960000	563950000	6.95857e+08	119540000	395510000	307860000	2.74303e+08	323610000	275000000	278030000	2.92213e+08	2.53681	2.38133	0.938709	3	9	7	2	5	4
5255	Lysine-specific demethylase NO66;Nucleolar protein 66	27.2645	27.6442	27.2118	17.9157	25.5376	15.9255	24.5236	24.7462	23.9213			+		9	6	5	8	1	2	1	2	2	2	18.1	18.1	71.085	4.8187e-61	161220000	209770000	155440000	1.75477e+08	0	48706000	0	1.62353e+07	24118000	28141000	15886000	22715000	10.8083	7.72514	0.714741	8	7	9	1	2	1
5600	mRNA export factor TAP;Nuclear RNA export factor 1;Tip-associated protein;Tip-associating protein	25.2924	25.5065	25.9043	16.2692	16.9308	25.4087	17.5169	17.3771	16.3932			+		9	5	5	5	1	0	2	2	1	0	21	21	70.182	7.814e-52	41093000	47666000	62802000	5.05203e+07	0	0	44542000	1.48473e+07	0	0	0	0	3.40265	5.05203e+07	1.48473e+07	5	5	5	1	0	2
241	SMARCA4 isoform 2;SWI/SNF related, matrix associated, actin dependent regulator of chromatin, subfamily a, member 4, isoform CRA_c;ATP-dependent helicase SMARCA4;BRG1-associated factor 190A;Mitotic growth and transcription activator;Protein brahma homolog 1;Protein BRG-1;SNF2-beta;SWI/SNF-related matrix-associated actin-dependent regulator of chromatin subfamily A member 4;Transcription activator…	28.6108	28.3686	28.3018	27.7288	16.8076	27.9595	27.642	27.0013	27.314			+		10	8	6	6	5	1	3	5	2	2	8.2	8.2	188.86	1.1025e-154	409930000	346590000	330900000	3.62473e+08	222430000	0	261010000	1.61147e+08	209440000	134340000	166850000	170210000	2.24934	2.12957	0.946752	11	6	7	6	1	3
1108	Adapter-related protein complex 3 subunit beta-1;Adaptor protein complex AP-3 subunit beta-1;AP-3 complex subunit beta-1;Beta-3A-adaptin;Clathrin assembly protein complex 3 beta-1 large chain	28.354	28.3285	28.3429	28.8476	28.3211	28.871	28.7058	28.6575	28.9561			+		10	4	6	5	4	6	7	6	7	5	14.1	14.1	121.32	2.7299e-131	343080000	337080000	340460000	3.40207e+08	483060000	335360000	490940000	4.36453e+08	437840000	423410000	520780000	4.60677e+08	0.77948	0.738493	0.947418	4	7	5	4	6	8
2858	Alu corepressor 1;Antioxidant enzyme B166;Liver tissue 2D-page spot 71B;Peroxiredoxin V;Peroxiredoxin-5, mitochondrial;Peroxisomal antioxidant enzyme;PLP;Thioredoxin peroxidase PMP20;Thioredoxin reductase;TPx type VI;Putative uncharacterized protein PRDX5	31.7753	32.1348	31.9432	32.5009	32.7313	32.045	32.6209	32.6746	32.5261			+		10	7	8	8	7	9	9	9	8	9	46.3	46.3	22.086	1.1804e-81	3675600000	4715700000	4129100000	4.17347e+09	6077700000	7130000000	4431100000	5879600000	6605100000	6855600000	6184700000	6.54847e+09	0.709822	0.63732	0.897859	21	26	22	22	28	23
3494	GAP-associated tyrosine phosphoprotein p62;KH domain-containing, RNA-binding, signal transduction-associated protein 1;p21 Ras GTPase-activating protein-associated p62;p68;Src-associated in mitosis 68 kDa protein	31.2711	31.4969	31.7007	30.5079	31.5059	30.6153	30.4889	30.5628	30.8592			+		10	8	9	9	8	9	6	7	8	5	27.8	27.8	48.227	4.8195e-167	2591500000	3030500000	3490400000	3.03747e+09	1526800000	3049500000	1644900000	2.07373e+09	1506900000	1586100000	1947800000	1.68027e+09	1.46473	1.80773	1.23417	28	24	25	18	20	15
4608	Embryonic large molecule derived from yolk sac;Protein ELYS;Protein MEL-28;Putative AT-hook-containing transcription factor 1	25.962	25.997	26.4287	16.0201	25.6164	16.8702	16.7036	17.4904	17.0012			+		10	5	6	4	2	2	1	1	1	1	5.6	5.6	256	4.431e-43	65362000	66970000	90330000	7.42207e+07	0	51441000	0	17147000	0	0	0	0	4.32849	7.42207e+07	17147001	5	6	5	2	2	1
4674	Importin beta-2;Karyopherin beta-2;M9 region interaction protein;Transportin-1	27.5089	27.5344	27.7643	27.1359	26.9115	27.3565	26.9109	27.1591	27.0327			+		10	5	8	8	8	7	8	5	6	6	23.3	15.3	102.35	0	190990000	194400000	227970000	2.04453e+08	147470000	126230000	171840000	1.48513e+08	126180000	149870000	137290000	137780000	1.37667	1.48391	1.0779	6	9	12	10	8	10
121	Tumor suppressor p53-binding protein 1;Putative uncharacterized protein TP53BP1	26.7362	27.0282	26.9119	26.2416	26.494	26.9513	26.273	26.2383	26.0321			+		11	4	7	5	3	3	5	2	6	3	10.4	10.4	214.11	1.9806e-73	111790000	136870000	126270000	1.24977e+08	79343000	94514000	129760000	1.01206e+08	81090000	79163000	68618000	7.62903e+07	1.23488	1.63817	1.32659	4	7	5	3	3	5
2714	cAMP-dependent protein kinase catalytic subunit alpha;cDNA FLJ52554, highly similar to cAMP-dependent protein kinase, beta-catalytic subunit (EC 2.7.11.11);Putative uncharacterized protein PRKACB;cAMP-dependent protein kinase catalytic subunit beta;cDNA FLJ34101 fis, clone FCBBF3007631, highly similar to cAMP-dependent protein kinase, beta-catalytic subunit (EC 2.7.11.11);Protein kinase, cAMP-dep…	28.6952	28.516	28.6145	29.651	28.949	29.3531	29.6237	29.3686	29.1608			+		11	5	6	7	7	8	8	5	8	9	38.7	38.7	40.589	6.0508e-80	434620000	383860000	410990000	4.09823e+08	843000000	518210000	685770000	6.82327e+08	827230000	693140000	600150000	706840000	0.600626	0.579796	0.96532	6	6	7	9	8	8
2747	Macropain subunit C5;Multicatalytic endopeptidase complex subunit C5;Proteasome component C5;Proteasome gamma chain;Proteasome subunit beta type-1	31.0425	30.8644	30.9527	30.9333	30.9057	31.3625	31.5259	31.4991	31.4084			+		11	7	9	8	8	9	9	9	8	10	66	66	26.489	8.9593e-294	2211700000	1954800000	2078200000	2.08157e+09	2050500000	2011600000	2760900000	2.27433e+09	3092100000	3035000000	2850100000	2992400000	0.915243	0.695618	0.760037	15	17	17	15	13	17
3177	ADP-ribosylation factor-interacting protein 1;Arfaptin-1	26.9987	27.1917	27.4716	27.216	28.172	27.975	28.1006	28.4793	28.2933			+		11	3	5	5	8	6	5	5	7	4	39.9	39.9	41.738	4.1659e-61	134100000	153290000	186110000	1.57833e+08	155900000	302430000	263820000	2.40717e+08	287830000	374210000	328950000	330330000	0.655681	0.477805	0.728716	3	6	5	8	6	5
3894	Acylglycerol kinase, mitochondrial;Multiple substrate lipid kinase	29.4367	29.4742	29.108	28.9775	28.2882	28.3769	28.289	28.2012	28.6998			+		11	6	10	4	5	4	3	4	4	5	35.5	35.5	47.137	6.9539e-98	726630000	745770000	578590000	6.83663e+08	528560000	327780000	348580000	401640000	327980000	308600000	436020000	3.57533e+08	1.70218	1.91217	1.12336	9	13	6	7	6	5
4125	AAA nuclear coregulator cancer-associated protein;ATPase family AAA domain-containing protein 2	25.946	27.2271	26.6862	16.9966	25.569	26.2288	15.9536	16.1806	16.4978			+		11	4	8	3	1	2	2	1	2	0	11.9	11.9	158.55	5.3671e-15	64644000	157100000	107980000	109908000	0	49777000	78644000	42807000	0	0	0	0	2.56752	109908001	42807001	4	8	3	1	2	3
4825	CDK5 activator-binding protein C53;CDK5 regulatory subunit-associated protein 3;Protein HSF-27	27.673	27.5286	27.4536	27.123	27.4171	27.3714	27.0389	27.2425	27.0937			+		11	6	8	5	8	3	6	3	6	4	23.5	23.5	56.92	1.0748e-75	213990000	193620000	183800000	1.97137e+08	146160000	179210000	173630000	1.66333e+08	137890000	158790000	143220000	1.46633e+08	1.18519	1.34442	1.13435	7	9	5	8	3	6
4836	Zinc finger protein 512B	27.2671	27.1835	26.9517	26.9198	27.2272	26.4159	26.047	26.3447	26.1676			+		11	6	8	5	4	7	5	4	3	2	19.8	19.8	97.263	7.1668e-88	161510000	152420000	129800000	147910000	126960000	157110000	89531000	1.24534e+08	69333000	85222000	75377000	76644000	1.18771	1.92983	1.62483	6	8	5	4	8	5
1212	Treacher Collins syndrome protein;Treacle protein	28.7628	28.8152	28.9743	26.2322	27.6	27.8244	27.7331	27.9097	27.195			+		12	9	8	7	2	4	4	3	4	5	11.2	11.2	156.06	0	455460000	472310000	527400000	4.85057e+08	78827000	203440000	237680000	1.73316e+08	223100000	252150000	153640000	209630000	2.79869	2.31387	0.826769	11	13	10	2	5	6
2589	U2 small nuclear ribonucleoprotein A	30.7965	30.5854	31.0297	30.3189	30.4763	29.8513	30.1163	29.9285	30.0331			+		12	8	11	10	8	9	9	9	11	8	45.5	45.5	28.415	4.1179e-295	1865000000	1611100000	2192200000	1.88943e+09	1339400000	1493800000	968600000	1.26727e+09	1163900000	1021800000	1098700000	1094800000	1.49095	1.72583	1.15753	12	15	21	13	14	13
2767	L-isoaspartyl protein carboxyl methyltransferase;Protein L-isoaspartyl/D-aspartyl methyltransferase;Protein-beta-aspartate methyltransferase;Protein-L-isoaspartate(D-aspartate) O-methyltransferase;Protein-L-isoaspartate O-methyltransferase	31.89	31.5772	31.5699	32.7097	32.0437	31.8735	32.4858	32.173	32.3599			+		12	11	9	12	12	12	11	11	11	12	60.5	60.5	24.679	0	3979800000	3203900000	3187700000	3.45713e+09	7024500000	4427000000	3934500000	5.12867e+09	6014300000	4842000000	5512100000	5.45613e+09	0.67408	0.633623	0.939982	20	21	21	28	24	25
2814	30 kDa prosomal protein;Macropain subunit C2;Multicatalytic endopeptidase complex subunit C2;Proteasome component C2;Proteasome nu chain;Proteasome subunit alpha type-1;Proteasome subunit alpha type	30.9427	31.1036	31.2505	31.6928	31.8994	31.3731	31.7618	31.5659	31.7611			+		12	7	11	10	11	11	12	12	12	11	59.1	59.1	30.239	6.7955e-231	2063800000	2307300000	2554600000	2.30857e+09	3471100000	4005700000	2781300000	3.41937e+09	3641300000	3179000000	3639400000	3.48657e+09	0.675145	0.662132	0.980726	21	21	20	27	20	22
3341	Cyclophilin A;Cyclosporin A-binding protein;Peptidyl-prolyl cis-trans isomerase A;Rotamase A;Peptidyl-prolyl cis-trans isomerase;cDNA FLJ75025, highly similar to Homo sapiens peptidylprolyl isomerase A (cyclophilin A) (PPIA), transcript variant 2, mRNA;Peptidylprolyl isomerase A (Cyclophilin A)	34.5851	34.428	34.5964	35.0026	35.1575	34.7976	34.9733	34.933	35.2171			+		12	12	12	12	12	12	12	12	12	12	78.8	71.5	18.012	0	25772000000	23114000000	25975000000	2.49537e+10	34421000000	38323000000	29863000000	3.42023e+10	33730000000	32800000000	39940000000	35490000000	0.72959	0.703118	0.963717	91	96	123	174	222	130
4489	76 kDa protein;LAMA-like protein 2;Lamina ancestor homolog 2;Phospholipase B domain-containing protein 2;Putative phospholipase B-like 2;Putative phospholipase B-like 2 32 kDa form;Putative phospholipase B-like 2 45 kDa form	28.5695	28.4055	28.5371	29.513	29.4266	28.7896	29.1005	29.656	29.3767			+		12	4	5	4	8	7	5	9	10	9	26	26	65.471	1.1823e-178	398350000	355560000	389520000	3.81143e+08	766140000	721600000	464030000	650590000	575620000	845940000	697060000	7.06207e+08	0.585843	0.539705	0.921246	5	8	5	10	8	6
29	Uncharacterized protein KIAA0564	27.8955	28.0875	27.9725	25.896	26.9671	27.0267	27.0249	27.1289	26.971			+		13	6	10	8	2	2	3	2	3	3	8.7	8.7	214.82	1.156e-32	249670000	285210000	263360000	266080000	62441000	131190000	136720000	110117000	136550000	146760000	131550000	1.38287e+08	2.41634	1.92412	0.796295	6	11	9	2	2	3
2797	dTMP kinase;Thymidylate kinase	29.0302	28.9805	28.8873	29.8098	29.4418	29.0983	29.4964	29.3616	29.4308			+		13	7	11	8	7	9	9	10	7	8	63.2	63.2	23.819	3.1802e-120	548240000	529660000	496520000	5.24807e+08	941090000	729230000	574710000	7.48343e+08	757380000	689810000	723690000	7.23627e+08	0.701291	0.725245	1.03416	9	14	8	10	9	11
3625	Functional spliceosome-associated protein 79;hTREX90;NF2/meningioma region protein pK1.3;Placental protein 39.2;THO complex subunit 5 homolog	28.4008	27.6354	27.7708	26.5759	25.6683	22.6428	26.3206	25.9495	25.8644			+		13	10	6	10	5	4	2	3	3	2	31.5	31.5	78.507	5.9169e-105	354390000	208490000	229010000	2.63963e+08	100030000	53323000	6548700	5.33006e+07	83806000	64799000	61090000	6.98983e+07	4.95236	3.77639	0.762544	12	7	11	5	4	2
4252	Pumilio domain-containing protein C14orf21;Putative uncharacterized protein C14orf21	26.917	27.169	27.8101	25.1013	26.5588	26.8103	25.7043	25.8093	25.9818			+		13	8	7	11	5	5	4	3	5	5	36.2	36.2	69.437	5.6033e-164	126710000	150900000	235320000	1.70977e+08	35994000	98853000	117680000	8.41757e+07	54671000	58801000	66267000	59913000	2.03119	2.85375	1.40496	10	10	11	5	5	4
5925	Chloride intracellular channel protein 4;Intracellular chloride ion channel protein p64H1	30.3678	30.5614	30.3968	30.4595	29.7237	29.3001	29.6369	29.2506	29.6977			+		13	8	10	6	10	6	10	5	3	4	65.6	65.6	28.772	1.3845e-145	1385500000	1584500000	1413700000	1.46123e+09	1476500000	886570000	661030000	1.00803e+09	834840000	638700000	870780000	781440000	1.44959	1.86992	1.28997	16	15	14	16	7	11
313	cDNA FLJ38069 fis, clone CTONG2015434, highly similar to DOUBLE-STRAND BREAK REPAIR PROTEIN MRE11A;Double-strand break repair protein MRE11A;Meiotic recombination 11 homolog 1;Meiotic recombination 11 homolog A	27.0153	26.7841	27.2789	25.8347	26.3432	16.6359	15.8744	16.6367	16.0776			+		14	4	6	8	2	2	2	1	2	1	25.2	25.2	81.069	7.3125e-46	135650000	115560000	162840000	1.38017e+08	59844000	85129000	0	4.83243e+07	0	0	0	0	2.85605	1.38017e+08	4.83243e+07	4	6	9	2	2	2
880	Putative uncharacterized protein NDUFA10;Complex I-42kD;NADH dehydrogenase [ubiquinone] 1 alpha subcomplex subunit 10, mitochondrial;NADH-ubiquinone oxidoreductase 42 kDa subunit;NADH dehydrogenase ubiquinone 1 alpha subcomplex	29.1361	28.8195	29.0884	28.0903	28.5575	28.4739	28.5069	28.3254	28.5235			+		14	11	9	9	8	7	6	6	9	6	36.7	36.7	44.738	8.7829e-166	589970000	473750000	570790000	5.44837e+08	285780000	395070000	372810000	351220000	381450000	336360000	385860000	367890000	1.55127	1.48098	0.954688	12	9	11	9	8	7
2118	Actin-related protein 2/3 complex subunit 2;Arp2/3 complex 34 kDa subunit	31.7834	31.7609	31.7864	31.655	31.2561	31.1917	31.6366	31.5585	31.5069			+		14	10	12	12	12	9	12	10	12	12	63.3	63.3	34.333	3.1555e-210	3696100000	3639000000	3703900000	3.67967e+09	3381500000	2564600000	2452600000	2.79957e+09	3338700000	3162700000	3051500000	3184300000	1.31437	1.15557	0.879178	16	17	18	17	13	14
2663	Alcohol dehydrogenase [NADP+];Aldehyde reductase;Aldo-keto reductase family 1 member A1	29.7484	29.7784	29.7127	30.3936	30.0729	29.8648	30.2884	30.094	30.2449			+		14	10	10	11	14	10	11	12	12	9	57.2	57.2	36.573	4.8006e-209	901930000	920850000	879890000	900890000	1410500000	1129400000	977660000	1172520000	1311300000	1146000000	1272400000	1.24323e+09	0.768337	0.724635	0.943121	13	14	13	20	14	15
2865	HCNPpp;Hippocampal cholinergic neurostimulating peptide;Neuropolypeptide h3;Phosphatidylethanolamine-binding protein 1;Prostatic-binding protein;Raf kinase inhibitor protein;cDNA FLJ51535, highly similar to Phosphatidylethanolamine-binding protein 1	33.9177	33.9385	33.9387	34.3417	34.2204	34.0779	34.1597	34.3084	34.3796			+		14	11	12	13	12	13	11	11	12	11	78.1	78.1	21.057	0	16227000000	16463000000	16465000000	16385000000	21771000000	20016000000	18133000000	1.99733e+10	19191000000	21275000000	22351000000	20939000000	0.820344	0.782511	0.953882	43	40	44	44	43	41
3463	Lamin-B2	30.1034	29.8512	29.5523	15.9541	26.8373	16.3711	17.0974	17.6707	17.3502			+		14	6	12	9	0	2	1	0	0	0	25.8	24.7	67.688	3.379e-126	1153500000	968510000	787300000	969770000	0	119900000	0	3.99667e+07	0	0	0	0	24.2645	969770001	3.99667e+07	9	17	11	0	2	1
3697	Cutaneous T-cell lymphoma-associated antigen se33-1;Nuclear protein 220;Zinc finger matrin-like protein;Zinc finger protein 638;Putative uncharacterized protein ZNF638	27.7761	27.9232	27.8158	27.0459	27.6065	27.2404	26.5059	27.2057	26.8911			+		14	9	8	10	6	5	7	3	7	4	10.5	10.5	220.62	1.8131e-99	229840000	254520000	236260000	2.40207e+08	138560000	204350000	158560000	1.67157e+08	95296000	154790000	124460000	1.24849e+08	1.43702	1.92398	1.33887	10	8	11	6	5	7
4927	Ribonucleases P/MRP protein subunit POP1	33.7607	33.7722	33.3857	32.7978	33.0198	33.4318	32.8518	32.9177	32.8157			+		14	10	9	8	7	7	5	5	5	5	20.7	20.7	114.71	5.8353e-92	14554000000	14671000000	11223000000	1.34827e+10	7466400000	8708600000	11587000000	9254000000	7751500000	8113800000	7559900000	7808400000	1.45696	1.72669	1.18513	11	18	15	10	12	11
2215	Cleavage and polyadenylation specificity factor 25 kDa subunit;Cleavage and polyadenylation specificity factor subunit 5;Nucleoside diphosphate-linked moiety X motif 21;Pre-mRNA cleavage factor Im 25 kDa subunit	31.7254	31.7826	31.5216	31.1541	31.2255	30.4196	30.8397	30.7585	30.9295			+		15	9	12	11	10	10	12	11	11	12	61.2	61.2	26.227	6.2582e-234	3550600000	3694100000	3082700000	3.44247e+09	2389600000	2510800000	1436200000	2112200000	1921600000	1816500000	2045100000	1.92773e+09	1.6298	1.78576	1.09569	29	34	32	21	21	24
502	CF-1 64 kDa subunit;Cleavage stimulation factor 64 kDa subunit;Cleavage stimulation factor subunit 2;cDNA FLJ58787, highly similar to Cleavage stimulation factor 64 kDa subunit	30.9331	31.2831	31.3874	30.8861	30.9919	30.381	30.4804	30.2876	30.5499			+		16	9	14	10	9	8	9	10	10	12	40.2	40.2	60.959	3.1557e-245	2050200000	2613000000	2808900000	2490700000	1984500000	2135400000	1398300000	1839400000	1498000000	1310600000	1571900000	1.46017e+09	1.35408	1.70576	1.25972	13	20	17	14	13	11
2650	Placental ribonuclease inhibitor;Ribonuclease inhibitor;Ribonuclease/angiogenin inhibitor 1	29.3394	29.5007	29.5887	30.4948	29.7667	30.1291	30.197	30.33	30.2203			+		16	10	11	11	11	13	13	13	14	13	60.7	60.7	49.973	0	679250000	759640000	807380000	7.48757e+08	1513000000	913410000	1174300000	1.20024e+09	1230800000	1349700000	1250900000	1.27713e+09	0.623841	0.586279	0.93979	14	17	14	22	17	17
3241	70 kDa WD repeat tumor rejection antigen homolog;Coronin-7;cDNA FLJ37277 fis, clone BRAMY2012581, highly similar to Coronin-7;HCG1787779, isoform CRA_b	27.6572	27.8695	27.6449	27.8572	27.9147	28.1924	28.132	28.1982	28.2234			+		16	7	7	7	6	8	10	8	7	9	31.7	31.7	100.6	3.0379e-147	211660000	245220000	209860000	2.22247e+08	243140000	253020000	306730000	267630000	294150000	307970000	313390000	305170000	0.830425	0.728272	0.876987	8	8	8	7	8	10
2337	155 kDa nucleoporin;Nuclear pore complex protein Nup155;Nucleoporin Nup155;cDNA FLJ56637, highly similar to Nuclear pore complex protein Nup155	27.414	27.2951	27.4679	24.8811	26.2081	26.336	25.755	25.85	26.2307			+		17	9	8	9	2	6	4	3	2	3	20.6	20.6	155.2	0	178830000	164680000	185630000	176380000	30899000	77522000	84706000	6.43757e+07	56629000	60482000	78743000	6.52847e+07	2.73986	2.70171	0.986076	10	9	10	2	6	4
2802	ATP synthase subunit b, mitochondrial;ATP synthase, H+ transporting, mitochondrial F0 complex, subunit B1	32.3145	32.1645	32.1365	32.7508	32.7466	32.2138	32.462	32.6436	32.6273			+		18	9	14	11	11	9	12	12	15	11	55.5	55.5	28.908	1.4782e-226	5341000000	4813800000	4721200000	4.95867e+09	7227400000	7206200000	4980900000	6471500000	5916000000	6709500000	6634300000	6.41993e+09	0.766231	0.772386	1.00803	22	24	22	24	22	26
3687	NF-kappa-B-binding protein;Programmed cell death protein 11;Protein RRP5 homolog	28.3594	27.3602	28.1164	24.7102	24.2358	15.798	24.3481	25.8013	24.3358			+		18	10	13	10	2	2	0	2	3	2	13.4	13.4	208.7	2.3289e-108	344380000	172280000	290990000	2.69217e+08	27449000	19756000	0	15735000	21355000	58475000	21174000	33668000	17.1094	7.99622	0.467358	12	14	12	2	2	0
4089	Hepatocarcinoma high expression protein;Putative deoxyribonuclease TATDN1	30.3493	30.377	30.5247	30.5597	29.9962	29.5928	29.6597	29.7905	29.766			+		18	10	12	11	9	7	8	8	9	8	59.9	59.9	33.601	1.4412e-298	1367900000	1394400000	1544700000	1.43567e+09	1582700000	1070900000	809670000	1.15442e+09	848110000	928630000	912980000	8.96573e+08	1.24362	1.60128	1.28759	16	15	18	14	13	12
1265	Nucleolin;Protein C23;NCL protein	32.6643	32.7921	33.1682	31.581	32.1402	32.2804	32.111	32.1099	32.1183			+		19	15	18	15	14	14	14	14	16	15	25.6	25.6	76.613	0	6806600000	7437000000	9652300000	7965300000	3212400000	4733400000	5216300000	4.38737e+09	4638400000	4634900000	4662100000	4.64513e+09	1.81551	1.71476	0.944508	45	52	62	29	31	39
3022	Ran GTPase-activating protein 1	29.1809	29.2886	29.1656	28.4113	28.9178	28.9956	28.6476	28.816	28.7561			+		19	12	14	11	10	10	11	11	12	11	43.1	43.1	63.541	1.8583e-263	608610000	655780000	602190000	6.22193e+08	356980000	507130000	535220000	4.66443e+08	420530000	472570000	453370000	4.48823e+08	1.33391	1.38628	1.03926	16	21	15	11	13	16
5297	Exportin-5;Ran-binding protein 21;Putative uncharacterized protein XPO5	28.0663	27.6453	28.0619	27.1929	26.9367	27.7984	26.9525	27.0448	26.644			+		19	16	15	10	14	9	8	8	10	4	20.3	20.3	136.31	7.8368e-217	281060000	209930000	280210000	2.57067e+08	153420000	128460000	233430000	171770000	129870000	138450000	104870000	1.24397e+08	1.49657	2.06651	1.38082	22	20	17	17	11	10
1630	Myosin I beta;Myosin-Ic	28.3498	28.1958	28.1877	28.2256	27.6415	27.8283	27.8851	27.9465	27.9228			+		20	12	13	13	8	7	7	9	10	8	25.7	25.7	121.68	6.9962e-285	342090000	307450000	305740000	3.18427e+08	313870000	209380000	238310000	2.53853e+08	247890000	258670000	254450000	253670000	1.25437	1.25528	1.00072	12	14	16	10	10	7
2373	Mitochondrial import receptor subunit TOM70;Mitochondrial precursor proteins import receptor;Translocase of outer membrane 70 kDa subunit;cDNA FLJ57240, highly similar to Mitochondrial proteins import receptor	30.3651	30.3613	30.6001	29.6237	30.2971	29.7787	29.7604	30.0074	29.9168			+		20	13	17	13	10	12	13	12	15	12	53.5	53.5	67.454	0	1382900000	1379300000	1627600000	1.46327e+09	827240000	1319300000	921060000	1.02253e+09	909440000	1079300000	1013600000	1000780000	1.43102	1.46213	1.02174	21	28	26	17	20	19
2772	Nucleoside diphosphate kinase;C-myc purine-binding transcription factor PUF;nm23-H2;Nucleoside diphosphate kinase B	34.2127	34.252	34.2078	34.2764	34.6499	34.3434	34.7954	34.5662	34.5927			+		20	16	18	18	17	15	18	16	17	18	74.3	74.3	32.642	0	19909000000	20459000000	19842000000	20070000000	20808000000	26956000000	21796000000	2.31867e+10	29816000000	25437000000	25909000000	27054000000	0.865584	0.74185	0.857051	90	102	96	107	90	88
5706	Aspartyl aminopeptidase	30.8941	30.9326	31.0557	31.6586	31.217	31.3623	31.4355	31.4282	31.306			+		20	14	15	16	16	18	16	16	17	16	56.4	56.4	52.428	0	1995500000	2049500000	2232100000	2.09237e+09	3390000000	2496100000	2760600000	2.88223e+09	2904200000	2889600000	2654800000	2816200000	0.725953	0.742975	1.02345	20	21	24	25	27	27
463	6-phosphogluconate dehydrogenase, decarboxylating	31.6534	31.669	31.5845	32.624	31.904	32.3577	32.4804	32.1469	32.3378			+		21	15	14	10	16	13	16	12	14	15	55.5	55.5	53.139	0	3377800000	3414500000	3220200000	3337500000	6619200000	4018500000	5503500000	5380400000	5992100000	4755200000	5428100000	5391800000	0.620307	0.618996	0.997886	23	18	22	28	21	29
5924	Coatomer subunit gamma;Gamma-coat protein	29.4476	29.1333	29.5564	29.533	29.5375	30.1532	30.0165	29.9477	30.0835			+		22	14	13	15	15	15	14	13	14	19	35.5	35.5	97.717	0	732150000	588840000	789540000	703510000	776840000	779250000	1194000000	9.16697e+08	1086100000	1035500000	1137700000	1.08643e+09	0.76744	0.647541	0.843767	22	20	27	23	23	29
3698	Importin subunit beta-1;Importin-90;Karyopherin subunit beta-1;Nuclear factor p97;Pore targeting complex 97 kDa subunit;cDNA, FLJ79320, highly similar to Importin beta-1 subunit	31.4518	31.3225	31.3626	31.4721	30.8426	31.2329	31.1393	31.0526	31.1122			+		25	20	20	20	18	16	20	14	20	20	38.9	38.9	97.169	0	2937200000	2685500000	2761200000	2.79463e+09	2978800000	1925500000	2523800000	2.47603e+09	2365100000	2227200000	2321100000	2.30447e+09	1.12867	1.2127	1.07445	39	43	46	33	32	45
2512	Dolichyl-diphosphooligosaccharide--protein glycosyltransferase 67 kDa subunit;Dolichyl-diphosphooligosaccharide--protein glycosyltransferase subunit 1;Ribophorin I;Ribophorin-1;cDNA FLJ50809, highly similar to Dolichyl-diphosphooligosaccharide--protein glycosyltransferase 67 kDa subunit (EC 2.4.1.119);cDNA FLJ51908, highly similar to Dolichyl-diphosphooligosaccharide--proteinglycosyltransferase 6…	32.761	32.6419	32.6414	32.8801	32.6314	32.6925	32.875	32.888	32.868			+		26	22	24	18	20	22	20	23	23	19	53.2	53.2	68.569	0	7278600000	6701800000	6699300000	6.89323e+09	7905000000	6653100000	6941100000	7166400000	7876900000	7948300000	7838800000	7888000000	0.961882	0.873889	0.908519	48	43	41	41	36	39
2097	Chromosome region maintenance 1 protein homolog;Exportin-1	31.2597	31.0675	31.2124	30.9673	29.9822	30.3876	30.3604	30.6204	30.5611			+		27	19	21	21	14	14	18	17	14	11	35.5	35.5	123.38	0	2571100000	2250300000	2488100000	2436500000	2099400000	1060600000	1404700000	1.52157e+09	1378400000	1650700000	1584200000	1.53777e+09	1.60131	1.58444	0.989465	28	26	31	21	19	25
5004	Extended synaptotagmin-1;Membrane-bound C2 domain-containing protein;cDNA FLJ46898 fis, clone UTERU3022168, highly similar to Protein FAM62A	30.8221	30.7646	30.9233	30.8201	31.0899	31.1498	31.0953	31.164	31.271			+		31	15	18	19	19	25	22	19	20	24	38.7	38.7	124	0	1898400000	1824200000	2036300000	1.91963e+09	1895700000	2285600000	2382400000	2187900000	2294100000	2406100000	2591200000	2.43047e+09	0.877386	0.789821	0.900197	21	25	31	27	32	32
2771	Protein A1S9;Ubiquitin-activating enzyme E1;Ubiquitin-like modifier-activating enzyme 1;cDNA FLJ54582, highly similar to Ubiquitin-activating enzyme E1	32.9518	32.7899	32.6552	33.1413	33.1444	33.4929	33.2999	33.3505	33.2181			+		37	22	26	25	27	27	29	31	28	30	52.7	52.7	117.85	0	8307500000	7425700000	6763900000	7.49903e+09	9473800000	9494100000	12088000000	1.0352e+10	10575000000	10952000000	9992100000	1.05064e+10	0.724407	0.713761	0.985304	56	54	57	69	60	77
5364	Chronic myelogenous leukemia tumor antigen 28;Exosome complex exonuclease RRP46;Exosome component 5;p12B;Ribosomal RNA-processing protein 46	17.0271	26.6072	26.2558	25.7048	26.0447	26.1082	17.2599	17.6371	18.7392				+	3	2	2	2	2	2	2	1	1	1	20	20	25.249	6.0968e-13	0	102230000	80129000	6.07863e+07	54690000	69221000	72337000	65416000	0	0	0	0	0.929227	6.07863e+07	65416001	3	2	2	2	2	2
1931	Toll-interacting protein;cDNA FLJ33531 fis, clone BRAMY2007255, highly similar to Toll-interacting protein;cDNA FLJ45180 fis, clone BRAWH3047565, highly similar to Toll-interacting protein	16.3982	27.9479	16.2127	15.0628	15.9637	15.9067	28.1251	28.0896	28.0781				+	4	1	2	1	1	2	1	3	3	2	16.2	16.2	38.894	2.2281e-20	0	258920000	0	8.63067e+07	0	0	0	0	292760000	285630000	283360000	287250000	8.63067e+07	0.300458	3.48129e-09	1	2	1	2	2	1
1651	hTREX45;TEX1 homolog;THO complex subunit 3;THOC3 protein	16.961	17.0873	24.6822	16.4353	18.1865	17.0222	26.1098	25.6423	26.4348				+	5	2	2	2	1	1	2	2	4	2	28.8	28.8	38.771	1.2741e-56	0	0	26920000	8.97333e+06	0	0	0	0	72414000	52371000	90713000	7.18327e+07	8.97333e+06	0.12492	1.39212e-08	6	7	6	3	3	2
3912	MCP-induced protein 1;Ribonuclease ZC3H12A;Zinc finger CCCH domain-containing protein 12A	16.5814	22.9049	15.8025	18.1768	17.2238	16.7633	24.2288	23.9796	23.6452				+	5	1	2	0	2	2	2	3	2	2	12.5	12.5	65.698	8.5672e-46	0	7853500	0	2.61783e+06	0	0	0	0	19661000	16542000	13119000	1.64407e+07	2.61783e+06	0.159229	6.08248e-08	1	2	0	3	2	2
4411	Dilute suppressor protein homolog;Melanoregulin;Putative uncharacterized protein MREG	16.6056	27.1321	27.4695	16.2224	16.7741	16.2929	26.6554	26.6182	26.4643				+	6	2	3	4	0	0	1	2	4	3	39.7	39.7	26.043	1.2084e-44	0	147090000	185840000	1.10977e+08	0	0	0	0	105700000	103010000	92587000	1.00432e+08	1.10977e+08	1.10499	9.95695e-09	2	3	5	0	0	2
5567	HEAT repeat-containing protein 5B	25.216	17.5845	24.9234	25.421	25.3138	25.5127	16.3986	16.9837	18.2458				+	6	3	1	2	5	3	2	1	1	2	4.7	4.7	224.3	3.312e-17	38975000	0	31819000	23598000	44924000	41708000	47871000	4.48343e+07	0	0	0	0	0.526338	23598001	4.48343e+07	3	1	2	5	3	2
3444	DNA repair protein complementing XP-C cells;p125;Xeroderma pigmentosum group C-complementing protein	25.9483	18.3864	25.3774	25.9803	24.641	24.5455	16.1288	17.0236	16.4367				+	7	5	2	3	2	2	2	1	1	1	12.8	12.8	105.95	3.895e-36	64747000	0	43588000	3.61117e+07	66199000	26162000	24487000	3.89493e+07	0	0	0	0	0.927145	3.61117e+07	3.89493e+07	5	2	3	3	2	2
1037	Ubiquitin carrier protein D3;Ubiquitin-conjugating enzyme E2 D3;Ubiquitin-conjugating enzyme E2(17)KB 3;Ubiquitin-conjugating enzyme E2-17 kDa 3;Ubiquitin-protein ligase D3;Ubiquitin carrier protein D2;Ubiquitin-conjugating enzyme E2 D2;Ubiquitin-conjugating enzyme E2(17)KB 2;Ubiquitin-conjugating enzyme E2-17 kDa 2;Ubiquitin-protein ligase D2;Ubiquitin carrier protein	28.8035	28.5437	28.9103	29.8098	29.7585	29.4483	29.749	29.1206	29.9262		+			2	2	2	2	2	2	2	2	2	2	19.5	19.5	16.893	9.3376e-58	468500000	391300000	504510000	454770000	941120000	908220000	732520000	860620000	902250000	583680000	1020200000	8.35377e+08	0.528421	0.544389	1.03022	5	5	6	8	8	7
1674	Prostate epithelium-specific Ets transcription factor;Prostate-derived Ets factor;SAM pointed domain-containing Ets transcription factor	16.7203	15.5195	16.015	25.1576	25.3447	24.9718	25.0253	17.4205	17.7765		+			2	1	0	0	2	2	2	2	1	1	7.8	7.8	37.517	0.001444	0	0	0	0	37428000	42611000	32904000	3.76477e+07	34149000	0	0	11383000	2.65621e-08	8.78503e-08	3.30736	1	0	0	2	2	2
2259	Mitochondrial import inner membrane translocase subunit Tim17-B	25.801	25.5342	25.7061	24.6905	24.143	24.069	24.787	24.4591	16.6551		+			2	2	2	2	2	2	2	2	2	0	21.5	21.5	18.273	6.7109e-32	58462000	48591000	54742000	5.39317e+07	27076000	18525000	17599000	2.10667e+07	28949000	23064000	0	1.73377e+07	2.56005	3.11066	1.21508	2	4	4	2	2	2
3828	Histone H2A type 2-A;Histone H2A.2;Histone H2A/o;Histone H2A type 2-C;Histone H2A/q;Histone H2A-GL101	31.3095	30.8911	30.2922	16.6846	16.8844	17.0863	28.7532	30.6069	16.6038		+			2	2	2	2	1	1	1	2	2	1	54.6	36.9	14.095	5.4697e-159	2661300000	1991300000	1314800000	1.98913e+09	0	0	0	0	452450000	1635300000	0	6.95917e+08	1.98913e+09	2.85829	1.43695e-09	28	38	24	7	6	11
4710	Estrogen-regulated transcript 45 protein;Interferon-stimulated gene 20 kDa protein;Promyelocytic leukemia nuclear body-associated protein ISG20	16.6458	16.5594	17.3043	25.0118	25.0494	24.3285	16.6934	16.3047	26.1708		+			2	0	0	0	2	2	2	0	0	2	12.2	12.2	20.363	2.7221e-05	0	0	0	0	33831000	34724000	21068000	2.98743e+07	0	0	75544000	2.51813e+07	3.34735e-08	3.9712e-08	1.18637	0	0	0	2	3	2
4853	Uncharacterized protein C17orf56	17.2941	16.7119	15.5699	24.1038	24.4476	23.9887	22.7901	16.4331	24.3582		+			2	1	1	1	2	2	2	2	1	2	11.3	11.3	45.755	4.0244e-38	0	0	0	0	18029000	22881000	16646000	1.91853e+07	7252900	0	21506000	9586300	5.21231e-08	1.04316e-07	2.00133	1	1	1	2	2	2
4960	RNA-binding motif protein 30;RNA-binding motif protein 4B;RNA-binding protein 30;RNA-binding protein 4B	25.4841	26.6067	26.9685	17.3011	17.0266	16.7804	16.7531	25.2945	25.4275		+			2	2	2	2	1	1	1	1	2	2	30.4	12.3	40.149	6.3316e-80	46934000	102190000	131320000	9.34813e+07	0	0	0	0	0	41154000	45127000	2.87603e+07	9.34813e+07	3.25036	3.47701e-08	2	2	2	1	1	1
122	F-box only protein 2;Putative uncharacterized protein FBXO2	17.157	17.2307	16.2627	25.4751	25.1461	25.3141	25.0705	25.1045	17.1833		+			3	0	0	0	2	2	3	3	3	1	13.9	13.9	33.327	2.6185e-24	0	0	0	0	46642000	37130000	41717000	4.18297e+07	35235000	36076000	0	2.37703e+07	2.39065e-08	4.20692e-08	1.75974	0	0	0	2	2	3
362	COMM domain-containing protein 1;Protein Murr1;cDNA FLJ56664, highly similar to COMM domain-containing protein 1	15.9383	16.8619	16.4743	25.2625	25.9931	25.2559	25.7861	17.8379	26.3501		+			3	0	1	1	2	2	2	3	1	2	36.8	36.8	21.178	2.2082e-30	0	0	0	0	40249000	66788000	40068000	49035000	57860000	0	85540000	47800000	2.03936e-08	2.09205e-08	1.02584	0	1	1	3	3	3
596	Mitochondrial 18 kDa protein;Putative uncharacterized protein ENSP00000383926	16.6618	16.375	17.2755	23.7727	24.9141	24.6644	17.9777	24.3522	25.5214		+			3	1	1	1	2	2	2	0	3	2	20.5	20.5	18.01	5.9766e-26	0	0	0	0	14332000	31614000	26590000	2.41787e+07	0	21416000	48163000	23193000	4.13588e-08	4.31165e-08	1.0425	1	1	1	2	2	2
1463	Retinoic acid-induced gene B protein;UbcH8;Ubiquitin carrier protein L6;Ubiquitin/ISG15-conjugating enzyme E2 L6;Ubiquitin-protein ligase L6	16.2596	16.8047	16.9907	25.9917	25.3473	24.8809	16.9234	26.0916	25.8617		+			3	0	0	1	2	3	2	1	2	2	38.6	38.6	17.769	1.2425e-08	0	0	0	0	66723000	42686000	30896000	4.67683e+07	0	71510000	60976000	44162000	2.1382e-08	2.26439e-08	1.05902	0	0	1	3	5	2
1799	39S ribosomal protein L40, mitochondrial;Nuclear localization signal-containing protein deleted in velocardiofacial syndrome;Up-regulated in metastasis	26.7209	27.0559	26.5341	25.7382	25.8496	25.7508	25.0681	16.8871	25.7177		+			3	2	3	2	2	2	2	2	1	2	20.4	20.4	24.49	1.5524e-15	110610000	139520000	97173000	1.15768e+08	55973000	60466000	56463000	57634000	35177000	0	55181000	3.01193e+07	2.00867	3.84363	1.91352	2	3	2	2	2	2
1866	Double FYVE-containing protein 1;SR3;Tandem FYVE fingers-1;Zinc finger FYVE domain-containing protein 1	17.0334	16.2736	16.2491	24.7551	24.8216	25.2526	18.5	16.1292	25.0069		+			3	0	0	1	2	3	3	1	1	2	5.3	5.3	88.422	8.6644e-13	0	0	0	0	28316000	29652000	39976000	32648000	0	0	33715000	1.12383e+07	3.06297e-08	8.89812e-08	2.90506	0	0	1	2	3	3
5348	H/ACA ribonucleoprotein complex subunit 3;Nucleolar protein 10;Nucleolar protein family A member 3;snoRNP protein NOP10	28.1911	28.0061	27.8079	24.3063	25.2529	25.1677	25.5233	25.4136	17.3739		+			3	2	3	2	2	2	2	2	2	1	45.3	45.3	7.7059	3.5465e-134	306460000	269570000	234970000	2.70333e+08	20745000	39983000	37691000	3.28063e+07	48226000	44696000	0	30974000	8.24028	8.72775	1.05916	3	5	4	2	3	3
678	cDNA FLJ54854, highly similar to Junctional adhesion molecule A;Junctional adhesion molecule 1;Junctional adhesion molecule A;Platelet adhesion molecule 1;Platelet F11 receptor;cDNA FLJ59609, highly similar to Junctional adhesion molecule A	27.0034	26.9431	26.1737	16.2689	16.7118	16.2543	17.9063	26.8254	18.0554		+			4	4	3	2	1	1	1	1	3	1	16.8	16.8	32.858	1.9293e-69	134530000	129030000	75697000	1.13086e+08	0	0	0	0	0	118920000	0	39640000	1.13086e+08	2.85282	2.5227e-08	4	3	2	2	1	2
800	Nuclear-interacting partner of ALK;Nuclear-interacting partner of anaplastic lymphoma kinase;Zinc finger C3HC-type protein 1;Putative uncharacterized protein ZC3HC1	25.7981	25.906	25.8044	17.3285	16.5351	16.4609	24.8091	24.6274	16.9726		+			4	2	4	2	1	1	1	2	2	1	9.8	9.8	55.261	1.1297e-22	58346000	62877000	58602000	5.99417e+07	0	0	0	0	29395000	25918000	0	1.84377e+07	5.99417e+07	3.25104	5.42368e-08	2	4	3	2	1	2
837	Deoxynucleotidyltransferase terminal-interacting protein 1;Terminal deoxynucleotidyltransferase-interacting factor 1;Putative uncharacterized protein DNTTIP1	26.5171	26.6002	26.5707	25.7826	25.9808	25.7056	25.0569	17.7599	25.7004		+			4	2	4	3	2	2	2	4	1	2	14.9	14.9	37.013	5.8245e-12	96039000	101730000	99674000	9.91477e+07	57721000	66223000	54720000	5.95547e+07	34905000	0	54523000	2.98093e+07	1.66482	3.32606	1.99785	2	4	3	2	2	2
2000	mRNA-decapping enzyme 1A;Smad4-interacting transcriptional co-activator;Transcription factor SMIF	16.4027	17.0939	17.9679	26.33	27.0718	25.1986	18.1529	26.6776	15.6747		+			4	1	1	2	2	3	2	1	3	2	11.5	11.5	63.352	2.5556e-65	0	0	0	0	84358000	141070000	38507000	8.79783e+07	0	107340000	0	35780000	1.13664e-08	2.79486e-08	2.45887	1	1	2	2	4	2
4025	Round spermatid basic protein 1	25.5044	25.5911	25.5787	16.9641	15.6583	17.0751	25.9695	25.1721	17.4898		+			4	2	4	2	1	0	0	2	2	1	7.4	7.4	90.071	5.1765e-22	47597000	50545000	50113000	4.94183e+07	0	0	0	0	65703000	37805000	0	3.45027e+07	4.94183e+07	1.4323	2.89833e-08	2	4	2	1	0	0
4080	Armadillo repeat-containing protein 6;cDNA FLJ50945, highly similar to Armadillo repeat-containing protein 6	25.9168	24.9227	26.7424	16.9763	18.0454	17.33	26.2018	25.9451	16.9604		+			4	2	3	3	1	1	1	3	2	0	19.4	19.4	54.141	8.177e-35	63347000	31804000	112270000	6.91403e+07	0	0	0	0	77183000	64604000	0	4.72623e+07	6.91403e+07	1.46291	2.11585e-08	2	3	5	1	1	2
4440	Leucine-rich repeat-containing protein 57	16.6262	17.3556	16.6951	26.1404	26.4536	25.8873	26.3262	17.699	16.8637		+			4	1	1	2	3	2	3	2	1	1	18.8	18.8	26.754	2.8963e-09	0	0	0	0	73969000	91902000	62066000	75979000	84133000	0	0	2.80443e+07	1.31615e-08	3.56578e-08	2.70925	1	1	2	3	2	3
5192	APG5-like;Apoptosis-specific protein;Autophagy protein 5	16.4737	15.2818	18.1058	27.9626	28.1698	27.0907	28.3656	16.9016	27.7441		+			4	1	1	1	2	3	2	2	1	3	21.8	21.8	32.447	1.7299e-10	0	0	0	0	261560000	301970000	142930000	2.35487e+08	345870000	0	224810000	1.90227e+08	4.24652e-09	5.25689e-09	1.23793	1	2	1	3	4	2
5622	Rotavirus X-associated non-structural protein;Zinc finger CCCH domain-containing protein 7B	16.7197	16.2328	16.84	23.6659	23.8877	24.1347	17.2485	16.5277	25.5561		+			4	0	1	1	3	2	3	2	1	2	7.2	7.2	111.58	3.2121e-19	0	0	0	0	13309000	15521000	18419000	1.57497e+07	0	0	49334000	1.64447e+07	6.34934e-08	6.081e-08	0.957737	0	1	1	3	2	3
49	Paralemmin-3	16.5248	16.414	16.7109	24.4999	25.9119	26.1727	25.5068	16.6159	26.6418		+			5	1	3	1	2	3	3	2	1	2	14.4	14.4	71.695	5.1585e-37	0	0	0	0	23725000	63131000	75641000	5.41657e+07	47678000	0	104710000	50796000	1.84619e-08	1.96866e-08	1.06634	1	3	1	2	4	3
604	Pescadillo homolog;Putative uncharacterized protein PES1	26.9941	26.8476	27.3467	25.6203	25.7264	25.9513	16.5052	26.2404	15.9081		+			5	3	3	5	2	2	2	1	2	1	11.1	11.1	68.002	2.3528e-12	133670000	120760000	170680000	1.41703e+08	51581000	55518000	64879000	57326000	0	79277000	0	2.64257e+07	2.47189	5.36234	2.16933	6	5	8	3	3	3
2477	Cystatin-3;Cystatin-C;Gamma-trace;Neuroendocrine basic polypeptide;Post-gamma-globulin	27.9064	28.174	27.9047	28.7028	28.9931	28.714	29.0998	28.0024	29.4082		+			5	2	2	3	3	2	2	2	3	4	44.5	44.5	15.799	4.4897e-18	251580000	302840000	251270000	2.68563e+08	436920000	534310000	440340000	4.70523e+08	575340000	268890000	712430000	5.18887e+08	0.570776	0.517576	0.906794	2	3	4	3	3	2
5905	Binder of OVCA1-1;Ribonucleoprotein RBM8A;RNA-binding motif protein 8A;RNA-binding protein 8A;RNA-binding protein Y14	29.4059	29.3308	29.3396	28.7811	28.7573	28.6635	28.9161	28.5553	27.444		+			5	2	5	3	2	3	3	3	3	3	29.9	29.9	19.889	2.5615e-33	711290000	675220000	679350000	688620000	461300000	453760000	425190000	446750000	506540000	394460000	182580000	3.61193e+08	1.5414	1.90651	1.23687	4	6	4	3	4	4
626	Putative uncharacterized protein TCEB2;Transcription elongation factor B (SIII), polypeptide 2 (18kDa, elongin B), isoform CRA_a;Elongin 18 kDa subunit;Elongin-B;RNA polymerase II transcription factor SIII subunit B;SIII p18;Transcription elongation factor B polypeptide 2;Transcription elongation factor B (SIII), polypeptide 2 (18kDa, elongin B), isoform CRA_b	28.8648	28.5373	28.7129	29.5795	29.3769	29.2902	29.6233	29.2836	29.0691		+			6	4	4	5	3	5	5	3	6	5	32.9	32.9	17.911	3.807e-115	488830000	389560000	440000000	4.39463e+08	802250000	697140000	656500000	718630000	826970000	653480000	563220000	6.81223e+08	0.611529	0.645109	1.05491	7	6	6	6	7	8
1611	PRP4 kinase;PRP4 pre-mRNA-processing factor 4 homolog;Serine/threonine-protein kinase PRP4 homolog	28.0254	27.8033	27.9664	26.4882	25.6398	26.1939	16.0668	25.5769	17.6663		+			6	5	4	6	3	2	5	1	2	1	8.1	8.1	116.99	1.1974e-141	273210000	234220000	262250000	256560000	94134000	52283000	76764000	7.43937e+07	0	50050000	0	1.66833e+07	3.44868	15.3782	4.45916	7	5	8	3	2	5
2091	MLC-2A;Myosin regulatory light chain 12B;Myosin regulatory light chain 20 kDa;Myosin regulatory light chain 2-B, smooth muscle isoform;Myosin regulatory light chain MRLC2;SHUJUN-1;MLC-2B;Myosin regulatory light chain 12A;Myosin regulatory light chain 2, nonsarcomeric;Myosin regulatory light chain MRLC3;Myosin RLC;20 kDa myosin light chain;MLC-2C;Myosin regulatory light chain 2, smooth muscle isof…	30.0113	29.9611	29.947	30.4665	30.5294	30.4524	30.7322	30.1901	30.2858		+			6	5	6	5	4	6	4	5	5	5	37.8	37.8	19.779	1.3965e-264	1082200000	1045200000	1035000000	1.05413e+09	1483600000	1549800000	1469200000	1.50087e+09	1783600000	1225000000	1309000000	1439200000	0.70235	0.732444	1.04285	9	10	8	7	11	7
2307	Peroxin-14;Peroxisomal membrane anchor protein PEX14;Peroxisomal membrane protein PEX14;PTS1 receptor-docking protein	25.963	26.3405	24.9609	17.1385	16.6194	16.4318	25.6754	17.3714	26.7028		+			6	3	2	3	1	2	1	2	1	3	30.2	30.2	41.236	2.3966e-166	65410000	84971000	32657000	6.10127e+07	0	0	0	0	53587000	0	109230000	5.42723e+07	6.10127e+07	1.12419	1.84256e-08	3	2	3	1	2	1
2488	Ferritin light chain	27.0385	26.3878	27.0993	15.7622	16.6535	17.0418	16.6238	25.4219	16.5817		+			6	2	4	3	1	2	1	0	2	1	36	36	20.019	1.5628e-14	137850000	87802000	143780000	123144000	0	0	0	0	0	44952000	0	14984000	123144001	8.21837	6.67378e-08	3	4	4	1	2	1
3436	Epidermal-type fatty acid-binding protein;Fatty acid-binding protein 5;Fatty acid-binding protein, epidermal;Psoriasis-associated fatty acid-binding protein homolog	28.1326	28.0814	28.0978	27.69	27.3087	27.3583	27.5153	27.74	28.0172		+			6	3	5	6	5	2	4	3	6	5	60	60	15.164	3.8823e-126	294280000	284020000	287260000	288520000	216530000	166240000	172050000	184940000	191840000	224160000	271650000	2.29217e+08	1.56007	1.25872	0.806835	3	6	9	5	3	4
3586	PP2A B subunit isoform B56-gamma;PP2A B subunit isoform B-gamma;PP2A B subunit isoform PR61-gamma;PP2A B subunit isoform R5-gamma;Renal carcinoma antigen NY-REN-29;Serine/threonine-protein phosphatase 2A 56 kDa regulatory subunit gamma isoform;Protein phosphatase 2, regulatory subunit B, gamma isoform;cDNA FLJ16473 fis, clone BRHIP3026052, highly similar to Serine/threonine protein phosphatase 2A…	25.6764	25.6943	25.6691	25.2935	25.1907	25.2373	24.5393	25.2218	25.2581		+			6	5	5	4	4	3	3	3	3	3	25.8	17.4	61.06	4.3477e-73	53625000	54294000	53353000	5.37573e+07	41124000	38295000	39553000	3.96573e+07	24382000	39132000	40127000	34547000	1.35555	1.55606	1.14792	6	5	4	4	4	3
4011	Vacuolar protein sorting-associated protein 53 homolog	27.1641	27.1615	27.0962	26.882	26.903	26.8358	16.5841	26.6928	27.0418		+			6	2	3	4	2	3	3	1	4	2	14.5	14.5	94.404	2.4136e-99	150390000	150120000	143470000	1.47993e+08	123680000	125490000	119780000	1.22983e+08	0	108480000	138160000	8.22133e+07	1.20336	1.80011	1.4959	2	4	5	2	3	3
4057	Tetratricopeptide repeat protein 19	25.3303	28.0028	26.6283	16.525	16.6532	17.4293	15.3474	16.1967	25.9935		+			6	2	5	3	1	1	1	1	1	2	21.3	21.3	42.456	2.0986e-08	42186000	268960000	103730000	138292000	0	0	0	0	0	0	66808000	2.22693e+07	138292001	6.20997	4.49048e-08	2	7	4	3	2	2
4883	BTB/POZ domain-containing protein 14B;Nucleus accumbens-associated protein 1	25.1934	25.1875	25.4501	26.2534	26.1595	26.0925	25.9056	25.4603	17.0358		+			6	4	3	3	5	3	2	2	4	1	13.1	13.1	57.258	5.5259e-124	38369000	38212000	45841000	4.08073e+07	79992000	74955000	71553000	75500000	62857000	46164000	0	3.63403e+07	0.540494	1.12292	2.07758	3	3	3	5	4	2
2173	Hepatocyte growth factor activator inhibitor type 2;Kunitz-type protease inhibitor 2;Placental bikunin;cDNA FLJ52992, highly similar to Kunitz-type protease inhibitor 2;Serine peptidase inhibitor, Kunitz type, 2, isoform CRA_b	28.5155	28.0854	28.0497	28.9994	29.0127	29.0682	29.9413	29.459	28.4834		+			7	4	5	4	5	3	3	3	4	4	37.7	37.7	28.228	2.1411e-72	383720000	284810000	277850000	315460000	536640000	541630000	562860000	5.47043e+08	1030900000	737950000	375290000	7.14713e+08	0.576664	0.44138	0.765402	4	6	5	5	4	4
4542	Brix domain-containing protein 2;Ribosome biogenesis protein BRX1 homolog	28.8091	28.9947	28.5834	27.4417	27.1877	27.1963	27.0387	26.7383	17.0632		+			7	7	6	5	4	3	2	3	2	1	30.3	30.3	41.401	1.5712e-55	470340000	534900000	402220000	4.69153e+08	182300000	152870000	153780000	1.62983e+08	137870000	111950000	0	8.32733e+07	2.87854	5.6339	1.95721	8	8	7	4	3	2
5851	Ras-related protein Rap-2c	27.8346	27.7698	27.6202	26.9864	27.0997	27.2783	26.4998	26.8761	16.483		+			7	4	5	4	4	3	4	3	3	1	61.7	61.7	20.745	3.1046e-112	239360000	228850000	206310000	224840000	132960000	143820000	162770000	1.46517e+08	94891000	123170000	0	72687000	1.53457	3.09326	2.01572	4	6	4	4	4	4
4287	Coactivator-associated arginine methyltransferase 1;Histone-arginine methyltransferase CARM1;Protein arginine N-methyltransferase 4	28.9735	28.566	28.6044	27.7154	27.6858	27.8311	26.3844	28.6169	28.1601		+			8	5	5	6	4	3	5	3	5	6	25.8	25.8	65.853	5.3381e-89	527110000	397390000	408110000	4.44203e+08	220380000	215900000	238780000	225020000	87595000	411670000	299940000	2.66402e+08	1.97406	1.66742	0.844664	10	7	10	5	6	8
5784	Carbonate dehydratase VB;Carbonic anhydrase 5B, mitochondrial;Carbonic anhydrase VB	17.3279	17.4438	17.3004	27.3619	27.5596	27.045	27.6054	27.1701	18.093		+			8	0	1	0	4	6	4	5	5	2	29.7	29.7	36.433	2.4027e-50	0	0	0	0	172490000	197820000	138470000	1.69593e+08	204200000	151010000	0	1.18403e+08	5.89646e-09	8.44571e-09	1.43234	0	1	0	5	7	5
2387		26.558	27.0347	26.5417	24.706	25.2881	25.5246	16.5634	26.1813	25.3467		+			9	4	5	8	2	2	4	0	3	3	21.1	21.1	65.459	1.8393e-70	98802000	137490000	97687000	1.11326e+08	27368000	40970000	48268000	3.88687e+07	0	76098000	42670000	3.95893e+07	2.86417	2.81203	0.981796	4	7	8	2	2	4
5745	COP9 signalosome complex subunit 3;JAB1-containing signalosome subunit 3;cDNA FLJ51147, highly similar to COP9 signalosome complex subunit 3;cDNA, FLJ79299, highly similar to COP9 signalosome complex subunit 3	28.0036	27.8306	27.9071	28.6538	28.3592	28.4527	28.2133	27.962	28.8043		+			9	4	7	6	7	6	6	8	7	7	35.9	35.9	47.873	1.5524e-295	269110000	238700000	251700000	253170000	422320000	344330000	367380000	378010000	311200000	261450000	468780000	3.47143e+08	0.669744	0.729295	1.08892	4	7	8	11	7	8
413	ATP synthase subunit gamma, mitochondrial;F-ATPase gamma subunit;ATP synthase gamma chain	30.2881	30.165	30.1879	29.8576	29.8401	29.8165	29.7823	29.8185	30.1023		+			10	9	10	9	7	6	6	6	9	8	38.3	38.3	32.996	1.1593e-151	1311100000	1203800000	1223100000	1246000000	972850000	961100000	945470000	9.59807e+08	923340000	946810000	1152600000	1.00758e+09	1.29818	1.23662	0.952583	15	12	14	10	8	9
702	24-dehydrocholesterol reductase;3-beta-hydroxysterol delta-24-reductase;Diminuto/dwarf1 homolog;Seladin-1;cDNA FLJ53870, highly similar to 24-dehydrocholesterol reductase (EC1.3.1.-)	28.489	28.2398	28.2525	29.4425	29.2661	29.1113	29.6043	28.6416	29.6351		+			10	5	4	3	4	3	5	5	7	7	28.5	28.5	60.101	7.3327e-113	376730000	316970000	319780000	3.37827e+08	729570000	645630000	579930000	651710000	816170000	418770000	833810000	6.89583e+08	0.51837	0.4899	0.945078	5	7	4	6	6	7
5761	Brain-specific angiogenesis inhibitor 1-associated protein 2;Fas ligand-associated factor 3;Insulin receptor substrate p53/p58;Insulin receptor substrate protein of 53 kDa;cDNA FLJ55181, highly similar to Brain-specific angiogenesis inhibitor1-associated protein 2	27.3841	27.3362	27.4066	27.8236	27.9829	27.7181	27.4971	27.7839	27.9551		+			10	5	6	7	6	5	7	7	6	6	22.6	22.6	60.867	6.8675e-106	175160000	169440000	177920000	1.74173e+08	237540000	265270000	220790000	241200000	189430000	231090000	260210000	226910000	0.722112	0.767588	1.06298	5	7	7	6	6	7
4596	Cofactor of BRCA1;Negative elongation factor B	27.2871	27.3541	27.4065	26.5561	26.7547	26.5865	25.9446	26.7206	27.1786		+			11	5	6	8	7	6	7	5	6	5	29.8	29.8	65.697	5.0474e-88	163770000	171550000	177900000	1.71073e+08	98672000	113230000	100770000	104224000	64579000	110590000	151910000	1.09026e+08	1.6414	1.5691	0.955953	6	8	10	8	7	7
5068	E2-induced gene 3 protein;Guanine nucleotide-binding protein-like 3;Novel nucleolar protein 47;Nucleolar GTP-binding protein 3;Nucleostemin	27.7487	27.8654	27.5421	26.691	26.5986	26.6512	17.8586	25.1943	16.2592		+			11	6	8	7	3	3	2	2	2	1	26.6	26.6	61.992	1.8382e-184	225520000	244520000	195440000	2.21827e+08	108340000	101620000	105390000	1.05117e+08	0	38391000	0	12797000	2.11029	17.3343	8.21416	8	10	8	5	4	4
5573	RNA-binding motif protein 27;RNA-binding protein 27	25.7964	25.7314	26.4416	17.6668	16.3726	16.0408	16.6054	24.7633	16.02		+			11	3	4	7	1	2	1	0	3	2	17.1	17.1	118.72	1.1387e-37	58275000	55708000	91139000	68374000	0	0	0	0	0	28478000	0	9.49267e+06	68374001	7.20282	1.05344e-07	3	4	7	1	2	1
239	Flotillin-1;Flotillin 1;cDNA FLJ54943, highly similar to Flotillin-1	28.3442	28.0218	28.3172	27.3399	27.3758	27.5232	27.0071	27.3003	25.4854		+			12	7	8	9	5	6	5	2	5	3	40	40	47.355	0	340770000	272530000	334440000	3.15913e+08	169870000	174160000	192890000	1.78973e+08	134880000	165280000	46976000	115712000	1.76514	2.73017	1.54671	12	10	11	9	8	6
1683	Hepatocyte growth factor activator inhibitor type 1;Kunitz-type protease inhibitor 1	26.8963	26.8376	26.7077	27.6184	27.4988	27.2582	27.9843	27.7906	26.9769		+			12	4	6	2	6	6	4	4	6	5	31.2	31.2	58.397	5.4094e-112	124910000	119930000	109600000	1.18147e+08	206050000	189650000	160520000	1.85407e+08	265540000	232170000	132090000	2.09933e+08	0.63723	0.562782	0.883169	4	6	2	6	6	4
1921	Nucleolar protein 6;Nucleolar RNA-associated protein	28.1113	27.2822	27.3396	25.8889	26.0328	25.7188	25.7078	17.0832	16.0798		+			12	8	7	9	3	2	2	2	1	0	16.6	16.6	127.59	2.6895e-124	289960000	163220000	169840000	2.07673e+08	62136000	68654000	55224000	6.20047e+07	54803000	0	0	1.82677e+07	3.34932	11.3684	3.39423	10	8	9	3	2	2
3867	Partner of ARF;Putative GTP-binding protein Parf;Putative uncharacterized protein C9orf86	25.446	25.2417	25.1157	25.9319	26.2675	26.0991	25.6028	26.1636	26.3575		+			12	4	4	3	8	6	5	5	7	5	21.7	21.7	79.548	3.5045e-89	45710000	39675000	36357000	4.05807e+07	64016000	80780000	71880000	7.22253e+07	50959000	75168000	85981000	7.07027e+07	0.561862	0.573962	1.02154	4	4	3	8	7	5
455	65 kDa eukaryotic translation initiation factor 2A;Eukaryotic translation initiation factor 2A;cDNA FLJ58035, highly similar to Homo sapiens eukaryotic translation initiation factor (eIF) 2A (eIF2A), mRNA;cDNA FLJ57962, highly similar to Homo sapiens eukaryotic translation initiation factor (eIF) 2A (eIF2A), mRNA	28.5441	28.3559	28.4673	28.9762	28.9249	29.0214	28.962	28.5536	28.9397		+			13	8	9	11	10	10	11	10	10	9	36.1	36.1	64.989	1.4712e-288	391420000	343530000	371130000	3.68693e+08	528080000	509630000	544910000	527540000	522900000	393990000	514900000	4.77263e+08	0.698892	0.772516	1.10534	8	9	12	11	11	13
3013	Elongation factor Ts, mitochondrial;Elongation factor Ts	29.2709	29.1927	29.1205	28.9113	28.7162	28.718	28.5951	28.3763	28.9252		+			13	9	11	10	9	10	7	6	8	8	48.6	48.6	37.656	2.1159e-107	647790000	613590000	583640000	6.15007e+08	504850000	441000000	441540000	4.62463e+08	405490000	348440000	509760000	421230000	1.32985	1.46003	1.09789	10	12	12	10	12	8
5024	Protein LUMA;Transmembrane protein 43	29.0734	28.9247	29.4246	28.2188	28.1036	28.0281	27.778	28.5238	28.5476		+			13	7	8	8	4	5	6	3	6	8	40	40	44.875	3.6865e-122	564880000	509570000	720570000	598340000	312390000	288430000	273710000	291510000	230150000	385930000	392360000	3.36147e+08	2.05255	1.78	0.867211	11	11	11	5	7	6
3751	HBV XAg-transactivated protein 5;HBV X-transactivated gene 5 protein;Minor histocompatibility antigen HA-8;Pumilio domain-containing protein KIAA0020	27.7569	27.6026	27.8344	26.0149	25.281	26.2262	25.8868	16.2345	17.513		+			14	7	8	9	2	2	2	2	2	1	30.1	30.1	73.584	1.9737e-121	226800000	203800000	239320000	2.23307e+08	67804000	40769000	78502000	6.23583e+07	62045000	0	0	2.06817e+07	3.58102	10.7973	3.01515	7	9	9	2	2	2
4901	Spermatid perinuclear RNA-binding protein	28.2998	28.3889	28.5955	26.8585	27.1531	26.9778	26.7407	26.4607	16.6779		+			15	10	11	12	6	4	4	4	3	1	33.5	26	73.652	3.4412e-148	330440000	351480000	405610000	362510000	121680000	149240000	132170000	1.34363e+08	112140000	92353000	0	6.81643e+07	2.69798	5.31818	1.97117	12	16	15	7	4	4
[truncated: 2,583 more rows]
[truncated: 14 more columns]

## Sheet: Sheet2-P5-Adh Significant
id	t-test Significant_Adh-P5	Mol. Weight [kDa]	LFQ Intensity Adherent3	LFQ Intensity Adherent6	LFQ Intensity Adherent9	Av.LFQ Intensity Adherent	LFQ Intensity Passage5-3	LFQ Intensity Passage5-6	LFQ Intensity Passage5-9	Av.LFQ Intensity Passage5	ratio (Adh+1)/(P5+1)	MS/MS Count Adherent3	MS/MS Count Adherent6	MS/MS Count Adherent9	MS/MS Count Passage2-3	MS/MS Count Passage2-6	MS/MS Count Passage2-9	MS/MS Count Passage5-3	MS/MS Count Passage5-6	MS/MS Count Passage5-9	ratio (P5+1)/(Adh+1)	t-test p value_P5-Adh	t-test Difference_P5-Adh	Protein IDs	Protein Names	Gene Names	id	1st Gene name	1st-Protein_ID
[truncated: 746 more rows]

[truncated: 3 more sheets: Sheet3-P2-Adh Significant, Sheet4-P5-P2 Significant, Sheet5-ANOVA Significant]
